# Supplementary material for: Deep Sequencing of Human Nuclear and Cytoplasmic Small RNAs Reveals an Unexpectedly Complex Subcellular Distribution of miRNAs and tRNA 3′ Trailers
Source: PLoS One. 2010 May 14;5(5):e10563. doi: 10.1371/journal.pone.0010563 (PMC2871053; doi:10.1371/journal.pone.0010563)
Supplement: Table S1 — The N/C values of diverse sRNAs. sRNAs with raw read counts (non-normalized) more than 10 in at least one library were listed. N/C indicates the ratio of nuclear sRNA library count to cytoplasmic sRNA library count of each unique sequence. Nuclear and cytoplasmic indicate the read counts in the nuclear and cytoplasmic sRNA libraries, respectively. Read count of each sRNA were normalized to reads per million (RPM). (2.43 MB XLS) [file pone.0010563.s003.xls]

## Sheet: microRNA
Sequence	Nuclear	Cytoplsamic	N/C	Gene
AUAUAUGAUGACUUAGCUUUUUUC	6.76	0	N.A.	hsa-mir-1259
AUAUAUGAUGACUUAGCUUUUU	6.39	0	N.A.	hsa-mir-1259
AUAUAUGAUGACUUAGCUUUUUUCC	5.07	0	N.A.	hsa-mir-1259
GGUUUUGUUUGGGUUUGUU	4.13	0	N.A.	hsa-mir-331
AUAUAUGAUGACUUAGCUUU	3.57	0	N.A.	hsa-mir-1259
CGGGGCGCCGCGGGACCGC	3.19	0	N.A.	hsa-mir-663
AUAUAUGAUGACUUAGCUUUUUUCCCC	2.44	0	N.A.	hsa-mir-1259
UCAGUGCAUCACAGAACU	2.44	0	N.A.	hsa-mir-148b
GUUUUGUUUGGGUUUGUU	2.25	0	N.A.	hsa-mir-331
UGAGGUAGUAGGUUGUAUAGUUUGG	2.25	0	N.A.	hsa-let-7a-3
GGGAUUACAGGCAUGAGCCA	1.88	0	N.A.	hsa-mir-619
GGUAGGAGGUUGUAUAGUU	1.88	0	N.A.	hsa-let-7e
CCUGUCUGAGCGUCGCU	344.43	8.58	40.1434	hsa-mir-1826
CCUGUCUGAGCGUCGCUU	95.64	2.7	35.4222	hsa-mir-1826
CGGGGCGCCGCGGGACCGCCC	5.07	0.25	20.28	hsa-mir-663
AGGCAAGAUGGUGGACUA	3.95	0.25	15.8	hsa-mir-1181
AUAUAUGAUGACUUAGCUUUUUU	9.02	0.74	12.1892	hsa-mir-1259
AGGCAAGAUGCUGGCA	2.82	0.25	11.28	hsa-mir-31
AACCUGGCAUACAAUGUAGAUUUC	2.63	0.25	10.52	hsa-mir-221
UAGUAGGUUGUGUGGUUU	2.63	0.25	10.52	hsa-let-7b
GGUAGUAGGUUGUGUGGU	4.7	0.49	9.59184	hsa-let-7b
GCUGGGAUUACAGGCAUG	2.25	0.25	9	hsa-mir-619
AUAUAUGAUGACUUAGC	6.2	0.74	8.37838	hsa-mir-1259
AUAUAUGAUGACUUAGCUUUU	6.2	0.74	8.37838	hsa-mir-1259
AAAGUGCUGUUCGUGCAGGUA	2.07	0.25	8.28	hsa-mir-93
UCAGUCGGAUGUUUACAG	2.07	0.25	8.28	hsa-mir-30e
GGUAGUAGGUUGUAUAGUUUG	16.16	1.96	8.2449	hsa-let-7a-3
CAGUUACCGCUUCCGCUACCGC	3.95	0.49	8.06122	hsa-mir-935
UGAGGUAGUAGAUUGUAUAGUUGUGG	3.95	0.49	8.06122	hsa-let-7f-1
AGGCAGUGUAGUUAGCUGAUUGC	1.88	0.25	7.52	hsa-mir-34c
CAAGUCACUAGUGGUUCCG	1.88	0.25	7.52	hsa-mir-224
CUGGGAUUACAGGCAUGAG	1.88	0.25	7.52	hsa-mir-619
GCACCAUCUGAAAUCGGUUA	1.88	0.25	7.52	hsa-mir-29a
GUUGAGGUAGUAGGUUGUAUGGU	1.88	0.25	7.52	hsa-let-7c
UAGCAGCACAUAAUGGUUUGUGGAU	1.88	0.25	7.52	hsa-mir-15a
UAAUGCCCCUAAAAAUCCUUAU	6.76	0.98	6.89796	hsa-mir-365-2,hsa-mir-365-1
UGGGUUUACGUUGGGAGAAC	4.89	0.74	6.60811	hsa-mir-629
UGAGGUAGUAGAUUGUAUAGUUGUGGG	3.19	0.49	6.5102	hsa-let-7f-1
UAUUGCACAUUACUAAGUUGCAU	15.6	2.45	6.36735	hsa-mir-32
AGGAAGCCCUGGAGGGGCUGGAGGU	3.01	0.49	6.14286	hsa-mir-671
GGUUGAGGUAGUAGGUUGU	3.01	0.49	6.14286	hsa-let-7a-2,hsa-let-7c
AUGGGUGAAUUUGUAGAAGGAU	4.32	0.74	5.83784	hsa-mir-1262
UUAUUGCUUAAGAAUACGCGUA	2.82	0.49	5.7551	hsa-mir-137
GAGGUAGUAGGUUGUGUG	3.95	0.74	5.33784	hsa-let-7b
GUAGUAGGUUGUGUGGUU	3.95	0.74	5.33784	hsa-let-7b
AGGUAGUAGUUUGUACAGUU	2.63	0.49	5.36735	hsa-let-7g
AGGUUGUAUAGUUGAGG	2.63	0.49	5.36735	hsa-let-7e
UAAAGUGCUUAUAGUGCAGG	2.63	0.49	5.36735	hsa-mir-20a
UAAGGUGCAUCUAGUGCAGAUA	6.2	1.23	5.04065	hsa-mir-18a
UAGCACCAUUUGAAAUCAGUGUUU	37.02	7.35	5.03673	hsa-mir-29b-2
AUGGCACUGGUAGAAUUCACU	2.44	0.49	4.97959	hsa-mir-183
GUAUGUGCCUUUGGACUACAUCGU	2.44	0.49	4.97959	hsa-mir-455
UCAGUGCACUACAGAACUUUGU	41.9	8.58	4.88345	hsa-mir-148a
AAGCAGCAUUGUACAGGGCUAU	3.57	0.74	4.82432	hsa-mir-103-1,hsa-mir-107,hsa-mir-103-2
UCUGGGCAACAAAGUGAGACCUU	7.89	1.72	4.58721	hsa-mir-1285-1
AGCAGCAUUGUACAGGGCUAUGAAG	2.25	0.49	4.59184	hsa-mir-103-1
CGCAUCCCCUAGGGCAUUGGUGU	2.25	0.49	4.59184	hsa-mir-324
UAGCACCAUUUGAAAUCAGUGUU	355.33	78.19	4.54444	hsa-mir-29b-2,hsa-mir-29b-1
ACCUGGCAUACAAUGUAGAUUUCU	22.92	5.15	4.45049	hsa-mir-221
UAGCACCAUUUGAAAUCAGU	19.17	4.41	4.34694	hsa-mir-29b-2,hsa-mir-29b-1
AUAUAUGAUGACUUAGCUUUUUUCCC	3.19	0.74	4.31081	hsa-mir-1259
UAGCACCAUUUGAAAUCAGUG	10.52	2.45	4.29388	hsa-mir-29b-1,hsa-mir-29b-2
CCACAGGGUAGAACCACGGAC	5.26	1.23	4.27642	hsa-mir-140
ACCUUGGCUCUAGACUGCUUACUG	4.13	0.98	4.21429	hsa-mir-212
UGAGGUAGUAGAUUGUAUAGUUGUG	4.13	0.98	4.21429	hsa-let-7f-1
AAGUUCUGUUAUACACUCAGGCU	2.07	0.49	4.22449	hsa-mir-148b
ACAGUGAACCGGUCUCUUU	2.07	0.49	4.22449	hsa-mir-128-1,hsa-mir-128-2
UCAGUGCACUACAGAA	2.07	0.49	4.22449	hsa-mir-148a
UCGACCGGACCUCGACCGGC	2.07	0.49	4.22449	hsa-mir-1307
UUCAAGUAAUUCAGGAUAGGUUGU	2.07	0.49	4.22449	hsa-mir-26b
UAGCACCAUUUGAAAUCAGUGU	41.15	9.81	4.1947	hsa-mir-29b-2,hsa-mir-29b-1
GCCUGUCUGAGCGUCGCUU	62.95	15.2	4.14145	hsa-mir-1826
UGAGGUAGUAGGUUGUAUAGUUUAG	3.01	0.74	4.06757	hsa-let-7a-2
GGUAGUAGGUUGUGUGGUU	15.41	3.92	3.93112	hsa-let-7b
UAGCAGCACAUCAUGGUUUAC	12.21	3.19	3.82759	hsa-mir-15b
GGUAGUAGGUUGUGUGGUUU	5.64	1.47	3.83673	hsa-let-7b
UGAGGUAGUAGGUUGUAUAGUUUUA	4.7	1.23	3.82114	hsa-let-7a-1
AACCUGGCAUACAAUGUAGAUUUCU	1.88	0.49	3.83673	hsa-mir-221
AACUGGCCCUCAAAGUCCCGCUU	1.88	0.49	3.83673	hsa-mir-193b
UAUGGCUUUUCAUUCCUAUGU	1.88	0.49	3.83673	hsa-mir-135b
UCAGUGCAUCACAGAACUUUGU	145.06	38.97	3.72235	hsa-mir-148b
CAAGUAAUUCAGGAUAGGUU	4.51	1.23	3.66667	hsa-mir-26b
UAGCAGCACAUAAUGGUUUG	4.51	1.23	3.66667	hsa-mir-15a
AGCAGCAUUGUACAGGGCUAUCAA	7.14	1.96	3.64286	hsa-mir-107
AAGGCAGGGCCCCCGCUCCCC	3.57	0.98	3.64286	hsa-mir-940
UUCAAGUAAUUCAGGAUA	2.63	0.74	3.55405	hsa-mir-26b
UUCAAGUAAUUCAGGAUAG	4.32	1.23	3.5122	hsa-mir-26b
GGUAGUAGGUUGUAUAGUU	18.79	5.39	3.48609	hsa-let-7a-1,hsa-let-7a-2,hsa-let-7a-3
UGGAAUGUAAAGAAGUAUGUAU	43.41	12.5	3.4728	hsa-mir-1-2,hsa-mir-1-1
GCCCCUGGGCCUAUCCUAGA	6.76	1.96	3.44898	hsa-mir-331
AAGGAGCUCACAGUCUAUUG	3.38	0.98	3.44898	hsa-mir-28
GAGGUAGUAGGUUGUAUGGU	3.38	0.98	3.44898	hsa-let-7c
AGAGGUAGUAGGUUGCA	69.34	20.59	3.36765	hsa-let-7d
AGGUAGUAGGUUGUAUAGUUUG	4.13	1.23	3.35772	hsa-let-7a-3
UUGGGUUCCUGGCAUGCUGAUU	4.13	1.23	3.35772	hsa-mir-23b
AAGAUGUGGAAAAAUUGGAAUC	2.44	0.74	3.2973	hsa-mir-576
CAGUGCAAUGAUAUUGUCAAAGCAU	2.44	0.74	3.2973	hsa-mir-301b
CGGCUCUGGGUCUGUGGGGA	2.44	0.74	3.2973	hsa-mir-760
AGCAUUGUACAGGGCUAUGA	8.08	2.45	3.29796	hsa-mir-103-2,hsa-mir-103-1
AGGUAGUAGAUUGUAUAGUUGU	3.19	0.98	3.2551	hsa-let-7f-1
UUGUUCGUUCGGCUCGCGUGA	3.19	0.98	3.2551	hsa-mir-375
UCUGGGCAACAAAGUGAGACCU	18.98	5.88	3.22789	hsa-mir-1285-2,hsa-mir-1285-1
AACAUUCAUUGCUGUCGGU	11.09	3.43	3.23324	hsa-mir-181b-2,hsa-mir-181b-1
AACAUUCAACCUGUCGGUGAGUUU	6.2	1.96	3.16327	hsa-mir-181c
UAGUAGGUUGUGUGGUU	6.2	1.96	3.16327	hsa-let-7b
UCAGUGCAUCACAGAACUU	6.01	1.96	3.06633	hsa-mir-148b
UUUCAGUCGGAUGUUUGCAGCU	5.26	1.72	3.05814	hsa-mir-30a
UCCCUGUCCUCCAGGAGCUCACGU	4.51	1.47	3.06803	hsa-mir-339
GUAGUAGGUUGUAUAGUU	3.76	1.23	3.05691	hsa-let-7a-2,hsa-let-7a-3,hsa-let-7a-1
UAGCAGCACAUAAUGGUUUGUGG	2.25	0.74	3.04054	hsa-mir-15a
CAAGUCACUAGUGGUUCCGUUUAGU	6.58	2.21	2.97738	hsa-mir-224
CCACGGAUGUUUGAGCAUGUG	8.64	2.94	2.93878	hsa-mir-105-2,hsa-mir-105-1
AGGAUGAGCAAAGAAAGUAGAU	4.32	1.47	2.93878	hsa-mir-1255a
UAGCACCAUUUGAAAUCAG	4.32	1.47	2.93878	hsa-mir-29b-2,hsa-mir-29b-1
AAUGGCGCCACUAGGGUUGUG	10.71	3.68	2.91033	hsa-mir-652
AGCAUUGUACAGGGCUAU	2.82	0.98	2.87755	hsa-mir-103-1,hsa-mir-107,hsa-mir-103-2
AGGAGGAAUUGGUGCUGGUCU	2.82	0.98	2.87755	hsa-mir-766
GAGGUAGUAAGUUGUAUUGUU	2.82	0.98	2.87755	hsa-mir-98
GAGGUAGUAGGUUGUAUA	2.82	0.98	2.87755	hsa-let-7a-3,hsa-let-7a-1,hsa-let-7a-2
UAGCACCAUUUGAAAUCGGUUA	222.67	78.44	2.83873	hsa-mir-29c
CAGCAGCAAUUCAUGUUUUGA	6.95	2.45	2.83673	hsa-mir-424
UCUGGGUGGUCUGGAGAUUUGU	8.27	2.94	2.81293	hsa-mir-1293
UCAAAGUGCUUACAGUGCAGGUA	4.13	1.47	2.80952	hsa-mir-17
CAGCAUUGUACAGGGCUAUGAA	2.07	0.74	2.7973	hsa-mir-103-2,hsa-mir-103-1
UCAGUGCAUGACAGAACUUG	2.07	0.74	2.7973	hsa-mir-152
UUAUGGUUUGCCUGGGACU	2.07	0.74	2.7973	hsa-mir-584
UACAGUACUGUGAUAACUGAA	131.91	47.8	2.75962	hsa-mir-101-1,hsa-mir-101-2
GAGGUAGUAGAUUGUAUA	3.38	1.23	2.74797	hsa-let-7f-2,hsa-let-7f-1
UGGAAGACUAGUGAUUUUG	3.38	1.23	2.74797	hsa-mir-7-3,hsa-mir-7-2,hsa-mir-7-1
UAGCAGCACAUCAUGGUUUACA	52.61	19.12	2.75157	hsa-mir-15b
GCCUGUCUGAGCGUCGCU	145.44	53.19	2.73435	hsa-mir-1826
UUUGGCAAUGGUAGAACUCACACUGGU	22.74	8.33	2.72989	hsa-mir-182
AAGCUCGGUCUGAGGCCCCUCA	7.89	2.94	2.68367	hsa-mir-423
CUAGACUGAAGCUCCUUGA	6.58	2.45	2.68571	hsa-mir-151
GACCUAUGAAUUGACAGCC	2.63	0.98	2.68367	hsa-mir-192
UGUAAACAUCCUCGACUGGAAGCUGU	2.63	0.98	2.68367	hsa-mir-30a
UGAGGUAGUAGGUUGUAUAGUUUG	11.09	4.17	2.65947	hsa-let-7a-3
UGAGGUAGUAAGUUGUAUUGUUG	5.83	2.21	2.63801	hsa-mir-98
GAGGUAGUAGGUUGUAUAGUUU	46.98	17.89	2.62605	hsa-let-7a-3,hsa-let-7a-1,hsa-let-7a-2
UAUGGCUUUUCAUUCCUAUGUGA	13.53	5.15	2.62718	hsa-mir-135b
GGUAGUAGAUUGUAUAGUUU	9.58	3.68	2.60326	hsa-let-7f-2
UGCUAUGCCAACAUAUUGCCAU	3.19	1.23	2.5935	hsa-mir-31
CUGACCUAUGAAUUGACAGCCAGU	10.15	3.92	2.58929	hsa-mir-192
UGGAAGACUAGUGAUUUUGUUGU	164.23	64.22	2.5573	hsa-mir-7-2,hsa-mir-7-1,hsa-mir-7-3
ACCUGGCAUACAAUGUAGAUUUC	23.86	9.31	2.56284	hsa-mir-221
AACUGGCCUACAAAGUCCCAG	1.88	0.74	2.54054	hsa-mir-193a
ACCACAGGGUAGAACCAC	1.88	0.74	2.54054	hsa-mir-140
AGGCAUUGACUUCUCACUAGCU	1.88	0.74	2.54054	hsa-mir-1256
AUAUAUGAUGACUUAGCUU	1.88	0.74	2.54054	hsa-mir-1259
CUGAGGUAGUAGUUUGUGCUGUU	1.88	0.74	2.54054	hsa-let-7i
UAACAGUCUACAGCCAUGGU	1.88	0.74	2.54054	hsa-mir-132
UCAGGCUCAGUCCCCUCCCGAU	1.88	0.74	2.54054	hsa-mir-484
UGAGGUAGUAGGUUGUAUAGUUUU	321.88	126.48	2.54491	hsa-let-7a-1
AUGAGGUAGUAGAUUGUAUAGUU	69.15	27.21	2.54135	hsa-let-7f-2
CUGGACUUGGAGUCAGAAGG	25.55	10.05	2.54229	hsa-mir-378
UGAGGUAGUAGAUUGUAUAGUUU	4682	1876.68	2.49483	hsa-let-7f-2
UAGCAGCACAUCAUGGUUU	4.89	1.96	2.4949	hsa-mir-15b
CGCGGGUGCUUACUGACCCUUUU	2.44	0.98	2.4898	hsa-mir-886
UAAUUUUAUGUAUAAGCUAGU	2.44	0.98	2.4898	hsa-mir-590
UCAGUGCAUGACAGAACUUGGG	197.86	80.16	2.46831	hsa-mir-152
UCGACCGGACCUCGACCGGCUC	77.98	31.87	2.44682	hsa-mir-1307
AGGUAGUAGGUUGUAUAGUUU	3.01	1.23	2.44715	hsa-let-7a-3,hsa-let-7a-1,hsa-let-7a-2
UAGCAGCACAUAAUGGUUUGU	45.47	18.63	2.44069	hsa-mir-15a
GAGGUAGUAGAUUGUAUAGUUU	28	11.52	2.43056	hsa-let-7f-2
UCAGUGCAUCACAGAACUUU	3.57	1.47	2.42857	hsa-mir-148b
UCAGUGCAUGACAGAACUUGG	239.01	99.28	2.40743	hsa-mir-152
UUUGUUCGUUCGGCUCGCGUGA	73.85	30.64	2.41025	hsa-mir-375
UCAGUGCACUACAGAACUUUG	12.4	5.15	2.40777	hsa-mir-148a
UGAGGUAGUAGGUUGUGU	1462.83	611.59	2.39185	hsa-let-7b
UGAGGUAGUAGAUUGUAUAGUUUU	65.58	27.45	2.38907	hsa-let-7f-2
AGGUAGUAGGUUGCAUAGUU	5.83	2.45	2.37959	hsa-let-7d
UGGAAGACUAGUGAUUUUGUUGUUU	13.34	5.64	2.36525	hsa-mir-7-1
GAGGUAGUAGGUUGUAUAGUU	471.08	201.25	2.34077	hsa-let-7a-1,hsa-let-7a-2,hsa-let-7a-3
GCCCCUGGGCCUAUCCUAGAA	21.23	9.07	2.34068	hsa-mir-331
AACUGGCCCUCAAAGUCCCGCU	10.9	4.66	2.33906	hsa-mir-193b
UGUAAACAUCCUCGACUGGAAGCU	1364.18	586.58	2.32565	hsa-mir-30a
GUGCAUUGUAGUUGCAUUGCA	121.95	52.46	2.32463	hsa-mir-33a
UGGAAGACUAGUGAUUUUGUUG	24.99	10.79	2.31603	hsa-mir-7-1,hsa-mir-7-3,hsa-mir-7-2
UAGCACCAUCUGAAAUCGG	246.53	107.12	2.30144	hsa-mir-29a
AGGAUGAGCAAAGAAAGUAGAUU	10.15	4.41	2.30159	hsa-mir-1255a
UGCUAUGCCAACAUAUUGCCAUC	6.76	2.94	2.29932	hsa-mir-31
UUGGGUUCCUGGCAUGCUGAUUU	3.95	1.72	2.29651	hsa-mir-23b
AGCCUGGAAGCUGGAGCCUGCAGU	2.82	1.23	2.29268	hsa-mir-1254
UAUGGCACUGGUAGAAUUCACUGU	2.82	1.23	2.29268	hsa-mir-183
UAACUGGUUGAACAACUGAAC	2.25	0.98	2.29592	hsa-mir-582
UGGCUAGGGAAAAUGAUUGGA	2.25	0.98	2.29592	hsa-mir-664
UUUGGCACUAGCACAUUUUUG	2.25	0.98	2.29592	hsa-mir-96
CUGGACUUGGAGUCAGAAGGC	166.11	72.56	2.28928	hsa-mir-378
UGAGGUAGUAAGUUGUAU	56	24.51	2.28478	hsa-mir-98
UACAGUACUGUGAUAACUGA	27.43	12.01	2.28393	hsa-mir-101-1,hsa-mir-101-2
CAUUGCACUUGUCUCGGU	31	13.73	2.25783	hsa-mir-25
ACUGGACUUGGAGUCAGAA	9.96	4.41	2.2585	hsa-mir-378
CAGUGCAAUGUUAAAAGGGCAUU	56.56	25.25	2.24	hsa-mir-130a
GUAAACAUCCUCGACUGGAAGCU	9.21	4.17	2.20863	hsa-mir-30a
UCCUUCAUUCCACCGGAGU	4.89	2.21	2.21267	hsa-mir-205
GAGGUAGUAGUUUGUGCUGUU	12.4	5.64	2.19858	hsa-let-7i
CUGGACUUGGAGUCAGAAGGCC	3.76	1.72	2.18605	hsa-mir-378
UGAGGUAGUAGGUUGUAUAGUUU	15061.6	6899.78	2.18291	hsa-let-7a-1,hsa-let-7a-2,hsa-let-7a-3
UGAGGUAGUAAGUUGUAUUGUU	930.31	430.44	2.1613	hsa-mir-98
GAGGUAGUAGAUUGUAUAGUU	499.07	230.91	2.16132	hsa-let-7f-2,hsa-let-7f-1
AAAAGUAAUUGCGGUCUUUGGU	8.46	3.92	2.15816	hsa-mir-548j
AACUGGCCUACAAAGUCCCAGU	5.83	2.7	2.15926	hsa-mir-193a
UGAGGUAGUAGUUUGUGC	41.15	19.12	2.1522	hsa-let-7i
UGAGACCUCUGGGUUCUGAGCU	10.52	4.9	2.14694	hsa-mir-769
CAGUGCAAUAGUAUUGUCAAAGCAU	5.26	2.45	2.14694	hsa-mir-301a
CCGCACUGUGGGUACUUGCU	5.26	2.45	2.14694	hsa-mir-106b
UCGACCGGACCUCGACCGGCUCGU	2.63	1.23	2.13821	hsa-mir-1307
UGAGAACUGAAUUCCAU	2.63	1.23	2.13821	hsa-mir-146b,hsa-mir-146a
ACUGGACUUGGAGUCAGAAG	99.21	46.82	2.11897	hsa-mir-378
UCAGUGCAUCACAGAACUUUG	8.83	4.17	2.11751	hsa-mir-148b
CGGAUGAGCAAAGAAAGUGGUU	6.76	3.19	2.11912	hsa-mir-1255b-1,hsa-mir-1255b-2
AUGCACCUGGGCAAGGAUUCU	4.13	1.96	2.10714	hsa-mir-500
ACUGCAGUGAAGGCACUUG	2.07	0.98	2.11224	hsa-mir-17
AGGGGGAAAGUUCUAUAGUCCU	2.07	0.98	2.11224	hsa-mir-625
CAGCAGCAAUUCAUGUUUUG	2.07	0.98	2.11224	hsa-mir-424
GAGGUAGUAGGUUGUAUAGUUUU	2.07	0.98	2.11224	hsa-let-7a-1
GCGGGGCUAGGGCUAACAGC	2.07	0.98	2.11224	hsa-mir-744
GUACAGUACUGUGAUAACU	2.07	0.98	2.11224	hsa-mir-101-2,hsa-mir-101-1
UAAAGUGCUUAUAGUGCAG	2.07	0.98	2.11224	hsa-mir-20a
UAACACUGUCUGGUAACGAUGUUC	2.07	0.98	2.11224	hsa-mir-200a
UUUGUUCGUUCGGCUCGCGU	2.07	0.98	2.11224	hsa-mir-375
UGAGGUAGUAGAUUGUAUAGUU	120792	57411.2	2.10397	hsa-let-7f-2,hsa-let-7f-1
AGGUAGUAGAUUGUAUAGUU	25.18	12.01	2.09659	hsa-let-7f-1,hsa-let-7f-2
AACAUUCAUUGCUGUCGGUGG	11.84	5.64	2.09929	hsa-mir-181b-2,hsa-mir-181b-1
UAGCAGCACAGAAAUAUUGGCA	5.64	2.7	2.08889	hsa-mir-195
UGAGGUAGUAGAUUGUAUAGUUG	696.75	335.58	2.07626	hsa-let-7f-1
UGGGUGGUCUGGAGAUUUGUGCA	3.57	1.72	2.07558	hsa-mir-1293
UGAGGUAGUAGGUUGUAUAGUU	214530	103456	2.07364	hsa-let-7a-1,hsa-let-7a-2,hsa-let-7a-3
AGCAGCAUUGUACAGGGCUAUGA	8420.54	4075.7	2.06604	hsa-mir-103-2,hsa-mir-103-1
GAGGUAGUAGAUUGUAUAG	5.07	2.45	2.06939	hsa-let-7f-1,hsa-let-7f-2
UCACAUUGCCAGGGAUUUCCAA	5.07	2.45	2.06939	hsa-mir-23a
UGGAAGACUAGUGAUUUUGUUGUU	291.25	141.68	2.05569	hsa-mir-7-3,hsa-mir-7-2,hsa-mir-7-1
UUGAGGUAGUAGGUUGUAUGGUU	30.25	14.71	2.05642	hsa-let-7c
GUACAGUACUGUGAUAACUGA	75.54	36.77	2.05439	hsa-mir-101-2,hsa-mir-101-1
GUGAGGUAGUAGGUUGUAUAGUUU	6.01	2.94	2.04422	hsa-let-7a-3
UUGAGGUAGUAGGUUGUAUAGUU	4.51	2.21	2.04072	hsa-let-7a-2
UGGGUUUACGUUGGGAG	55.62	27.45	2.02623	hsa-mir-629
ACUGGACUUGGAGUCAGAAGG	853.27	422.84	2.01795	hsa-mir-378
UACAGUACUGUGAUAACUGAAG	32.13	15.93	2.01695	hsa-mir-101-1,hsa-mir-101-2
AGCAGCAUUGUACAGGGCUAUGAAA	533.84	265.47	2.01092	hsa-mir-103-2
GUACAGUACUGUGAUAACUGAA	171.37	85.3	2.00903	hsa-mir-101-1,hsa-mir-101-2
ACCUGGCAUACAAUGUAGAUUU	53.18	26.47	2.00907	hsa-mir-221
UUUGGCAAUGGUAGAACUCACACUG	39.84	19.86	2.00604	hsa-mir-182
UAGCACCAUUUGAAAUCGGUU	7.89	3.92	2.01276	hsa-mir-29c
AAAGCUGGGUUGAGAGGGCGAAAA	3.95	1.96	2.01531	hsa-mir-320a
CUGCAGUGAAGGCACUUGUAGC	6.39	3.19	2.00313	hsa-mir-17
UACAGUACUGUGAUAACUGAAGA	6.39	3.19	2.00313	hsa-mir-101-2
AGCUCGGUCUGAGGCCC	13.15	6.62	1.9864	hsa-mir-423
CAGCAGCAAUUCAUGUUUUGAA	4.89	2.45	1.99592	hsa-mir-424
GUGAGGUAGUAGGUUGUAUAGUU	72.34	36.52	1.98083	hsa-let-7a-3
ACUGCAGUGAAGGCACUUGUAGC	46.04	23.29	1.97681	hsa-mir-17
GAGGUAGUAGAUUGUAUAGU	25.18	12.75	1.9749	hsa-let-7f-1,hsa-let-7f-2
UGGAAGACUAGUGAUUU	17.48	8.82	1.98186	hsa-mir-7-2,hsa-mir-7-1,hsa-mir-7-3
UGAAAUGUUUAGGACCACUAGA	9.21	4.66	1.97639	hsa-mir-203
UUUCAGUCGGAUGUUUGCA	8.27	4.17	1.98321	hsa-mir-30a
UUGAGGUAGUAGGUUGUAUGGU	18.79	9.56	1.96548	hsa-let-7c
AAAAGUACUUGCGGAUUUUGCU	14.47	7.35	1.96871	hsa-mir-548k
GAGGUAGUAGGUUGUAUAG	6.76	3.43	1.97085	hsa-let-7a-2,hsa-let-7a-3,hsa-let-7a-1
UAUUGCACAUUACUAAGUUGCA	3.38	1.72	1.96512	hsa-mir-32
GUGAAAUGUUUAGGACCACUA	4.32	2.21	1.95475	hsa-mir-203
AGCUACAUUGUCUGCUGG	64.08	32.85	1.95068	hsa-mir-221
UCUGGGUGGUCUGGAGAUUUGUG	18.04	9.31	1.9377	hsa-mir-1293
CUGACCUAUGAAUUGACAGCCAG	8.08	4.17	1.93765	hsa-mir-192
AGCUCGGUCUGAGGCCCCUCA	17.48	9.07	1.92723	hsa-mir-423
GUGCAUUGCUGUUGCAUUGC	14.66	7.6	1.92895	hsa-mir-33b
UGAGGUAGUAGGUUGUAUGGUUU	944.97	491.72	1.92176	hsa-let-7c
UAGCAGCACAUAAUGGUUUGUGGA	9.4	4.9	1.91837	hsa-mir-15a
UCACACAGAAAUCGCACCCGUCA	7.52	3.92	1.91837	hsa-mir-342
UGGGUUUACGUUGGGAGAACU	5.64	2.94	1.91837	hsa-mir-629
CAGCAUUGUACAGGGCUAU	4.7	2.45	1.91837	hsa-mir-107,hsa-mir-103-2,hsa-mir-103-1
CCACAGGGUAGAACCACGGACA	3.76	1.96	1.91837	hsa-mir-140
UUGAGGUAGUAGGUUGUAUGGUUU	3.76	1.96	1.91837	hsa-let-7c
AGGUAGUAGGUUGUGUGGU	2.82	1.47	1.91837	hsa-let-7b
UACAGUACUGUGAUAACUGAAGAA	2.82	1.47	1.91837	hsa-mir-101-2
AACUGGCCCUCAAAGUCCCGC	1.88	0.98	1.91837	hsa-mir-193b
AGGACCUUCCCUGAACCAAGGA	1.88	0.98	1.91837	hsa-mir-659
CAAAGCACACGGCCUGCAG	1.88	0.98	1.91837	hsa-mir-330
CAACACCAGUCGAUGGGCUGUCU	1.88	0.98	1.91837	hsa-mir-21
GAGGUAGUAGAUUGUAU	1.88	0.98	1.91837	hsa-let-7f-1,hsa-let-7f-2
GGUGAGGUAGUAGGUUGUGU	1.88	0.98	1.91837	hsa-let-7b
GUAGUAGGUUGUAUAGUUUG	1.88	0.98	1.91837	hsa-let-7a-3
UAGCAGCACAUCAUGGUU	1.88	0.98	1.91837	hsa-mir-15b
UGCACCAUGGUUGUCUGAGCA	1.88	0.98	1.91837	hsa-mir-767
ACUGGACUUGGAGUCAGAAGGC	1739.24	917.75	1.89511	hsa-mir-378
CAGCAUUGUACAGGGCUAUG	13.53	7.11	1.90295	hsa-mir-103-1,hsa-mir-103-2
UGAGGUAGUAGUUUGUGCUGUUG	58.81	31.13	1.88917	hsa-let-7i
AGGCAAGAUGCUGGCAUA	12.03	6.37	1.88854	hsa-mir-31
UGAGGUAGUAGUUUGUACAGUUU	520.12	276.01	1.88442	hsa-let-7g
AGGCAAGAUGCUGGCAU	5.07	2.7	1.87778	hsa-mir-31
AUCACAUUGCCAGGGAUUUCCAA	501.33	268.17	1.86945	hsa-mir-23a
AUCACAUUGCCAGGGAUUACCA	186.02	99.28	1.87369	hsa-mir-23b
CAAGUCACUAGUGGUUCCGUUUA	97.9	52.46	1.86618	hsa-mir-224
UGGGUUCCUGGCAUGCUGAUUU	56.75	30.4	1.86678	hsa-mir-23b
UAGCAGCACAUCAUGGUUUA	24.8	13.24	1.87311	hsa-mir-15b
UGGAAGACUAGUGAUUUUGUU	19.73	10.54	1.87192	hsa-mir-7-1,hsa-mir-7-3,hsa-mir-7-2
UGAGGUAGUAGAUUGUAUAGUUGU	35.14	18.87	1.86222	hsa-let-7f-1
UUGAGGUAGUAGGUUGUAUAGU	18.23	9.81	1.85831	hsa-let-7a-2
GAGGUAGGAGGUUGUAUAGUU	9.58	5.15	1.86019	hsa-let-7e
UGGAGAGAAAGGCAGUUCCUGAUG	3.19	1.72	1.85465	hsa-mir-185
UAAAGUGCUUAUAGUGCAGGU	17.66	9.56	1.84728	hsa-mir-20a
GAAGUUCUGUUAUACACUCAGGCU	16.35	8.82	1.85374	hsa-mir-148b
AGAGGUAGUAGGUUGCAUAGUUU	1093.98	593.2	1.8442	hsa-let-7d
AUCACAUUGCCAGGGAUUACCAC	218.91	119.13	1.83757	hsa-mir-23b
AGCUACAUUGUCUGCU	4.51	2.45	1.84082	hsa-mir-221
CUGGACUUGGAGUCAGAAG	2.25	1.23	1.82927	hsa-mir-378
GAGGCAAGAUGCUGGCAUAGCU	2.25	1.23	1.82927	hsa-mir-31
GAGGUAGUAGAUUGUAUAGUUG	2.25	1.23	1.82927	hsa-let-7f-1
GAGGUAGUAGUUUGUGCUGU	2.25	1.23	1.82927	hsa-let-7i
GUAUGUGCCUUUGGACUACAU	2.25	1.23	1.82927	hsa-mir-455
UGUAAACAUCCUUGACUG	2.25	1.23	1.82927	hsa-mir-30e
AGCAGCAUUGUACAGGGCUAUGAA	480.28	262.77	1.82776	hsa-mir-103-1,hsa-mir-103-2
UACCCUGUAGAUCCGAAUUUGU	158.22	86.53	1.8285	hsa-mir-10a
UUUCAGUCGGAUGUUUGCAG	121.95	66.67	1.82916	hsa-mir-30a
CCGGGUCGGAGUUAGCUCAAGCGG	24.24	13.24	1.83082	hsa-mir-886
UGAGGUAGUAGUUUGUA	47.16	25.98	1.81524	hsa-let-7g
UCCUUCAUUCCACCGGAGUCU	39.27	21.57	1.82058	hsa-mir-205
UGAGGUAGUAGUUUGU	3.57	1.96	1.82143	hsa-let-7g,hsa-let-7i
UGAGGUAGUAGUUUGUGCUGUU	8103.74	4465.44	1.81477	hsa-let-7i
CAGUGCAAUGUUAAAAGGGCA	34.2	18.87	1.8124	hsa-mir-130a
UGAGGUAGUAGUUUGUACAGUU	14961.9	8304.59	1.80164	hsa-let-7g
CUAGACUGAAGCUCCUUGAGG	120.26	66.67	1.80381	hsa-mir-151
AGAGGUAGUAGGUUGCAU	105.79	58.83	1.79823	hsa-let-7d
AGCAGCAUUGUACAGGGC	36.27	20.1	1.80448	hsa-mir-103-2,hsa-mir-103-1,hsa-mir-107
UUAUGGUUUGCCUGGGACUG	12.78	7.11	1.79747	hsa-mir-584
UCACAGUGAACCGGUCUCUUUUU	11.46	6.37	1.79906	hsa-mir-128-1
CUAGACUGAAGCUCCUUGAGGA	476.9	266.45	1.78983	hsa-mir-151
UAUUGCACUUGUCCCGGCCUGUU	80.8	45.1	1.79157	hsa-mir-92a-1
CAAAGCACACGGCCUGCAGA	2.63	1.47	1.78912	hsa-mir-330
CAAAGUGCUUACAGUGCAG	2.63	1.47	1.78912	hsa-mir-17
UGUGCAAAUCUAUGCAAAACUGA	2.63	1.47	1.78912	hsa-mir-19a
AACAUUCAUUGCUGUCGGUGGGUUU	122.14	68.64	1.77943	hsa-mir-181b-2
AGGCAAGAUGCUGGCAUAG	67.27	37.75	1.78199	hsa-mir-31
UCGACCGGACCUCGACCGGCU	35.33	19.86	1.77895	hsa-mir-1307
UGAGGUAGUAGUUUGUG	8.27	4.66	1.77468	hsa-let-7i
UUGCAUAUGUAGGAUGUCCCA	8.27	4.66	1.77468	hsa-mir-448
CUGCAGUGAAGGCACUUGUAGCA	5.64	3.19	1.76803	hsa-mir-17
UUUGGCAAUGGUAGAA	5.64	3.19	1.76803	hsa-mir-182
AGGCAAGAUGCUGGCAUAGCU	471.64	268.17	1.75874	hsa-mir-31
GAGGUAGUAGGUUGUGUGGU	18.6	10.54	1.76471	hsa-let-7b
AAGCUCGGUCUGAGGCCCCUCAGU	39.08	22.31	1.75168	hsa-mir-423
UUUGGCAAUGGUAGAACUCACACUGG	35.7	20.35	1.7543	hsa-mir-182
CUGAGGUAGUAGUUUGUACAGU	3.01	1.72	1.75	hsa-let-7g
GCAAAGCACACGGCCUGCAG	3.01	1.72	1.75	hsa-mir-330
UCAAGUAAUUCAGGAUAGGUU	3.01	1.72	1.75	hsa-mir-26b
UGGGUUCCUGGCAUGCUGAU	3.01	1.72	1.75	hsa-mir-23b
UGUUUGCAGAGGAAACUGAGACU	3.01	1.72	1.75	hsa-mir-452
UUGCAGCUGCCUGGGAGUGAC	3.01	1.72	1.75	hsa-mir-1301
CGCGGGUGCUUACUGACCCUUU	17.48	10.05	1.7393	hsa-mir-886
AGAGGUAGUAGGUUGCAUAGUU	11222.8	6486.5	1.73017	hsa-let-7d
UGAGGUAGUAGGUUGUG	483.66	280.18	1.72625	hsa-let-7b
AGAGGUAGUAGGUUGCAUAGUUUU	32.7	18.87	1.73291	hsa-let-7d
AUACUGCCUGGUAAUGAUGAC	30.06	17.4	1.72759	hsa-mir-200b
CAAAGCACACGGCCUGCAGAG	13.15	7.6	1.73026	hsa-mir-330
CAACGGAAUCCCAAAAGCA	11.46	6.62	1.73112	hsa-mir-191
UAGCAGCGGGAACAGUUCUG	8.08	4.66	1.73391	hsa-mir-503
AACAUUCAUUGCUGUCGGUG	21.05	12.26	1.71697	hsa-mir-181b-1,hsa-mir-181b-2
UUUGUUCGUUCGGCUCGCGUG	8.46	4.9	1.72653	hsa-mir-375
GUGGUCUGGAGAUUUGUGCAG	3.38	1.96	1.72449	hsa-mir-1293
GAGGUAGUAGGUUGUGUGGUUU	73.47	42.9	1.71259	hsa-let-7b
ACUGCAGUGAAGGCACUUGUAGCA	25.18	14.71	1.71176	hsa-mir-17
UUUGGCACUAGCACAUUUUUGCU	14.28	8.33	1.71429	hsa-mir-96
UGCGGGGCUAGGGCUAACA	5.45	3.19	1.70846	hsa-mir-744
AGCAGCAUUGUACAGGGCUA	297.45	175.26	1.69719	hsa-mir-107,hsa-mir-103-2,hsa-mir-103-1
AACAUUCAUUGCUGUCGGUGGG	47.54	27.94	1.7015	hsa-mir-181b-1,hsa-mir-181b-2
GUGAGGUAGUAGGUUGUAUAGU	46.79	27.45	1.70455	hsa-let-7a-3
UAGCAGCACGUAAAUAUUG	11.27	6.62	1.70242	hsa-mir-16-2,hsa-mir-16-1
UGGGUUCCUGGCAUGCUGAUU	11.27	6.62	1.70242	hsa-mir-23b
AAGAGGUAGUAGGUUGCAUAGUU	3.76	2.21	1.70136	hsa-let-7d
UAACAGUCUCCAGUCACGGCCA	3.76	2.21	1.70136	hsa-mir-212
AGGCAAGAUGCUGGCAUAGCUGU	838.99	495.15	1.69442	hsa-mir-31
AGCUACAUCUGGCUACUGGGUCUCU	191.29	113.25	1.68909	hsa-mir-222
UGAGGUAGUAGGUUGUAUAGUUUA	138.49	82.12	1.68643	hsa-let-7a-2
UGGGUUUACGUUGGGAGAA	32.7	19.36	1.68905	hsa-mir-629
GAGGUAGUAGUUUGUACAGUU	26.87	15.93	1.68675	hsa-let-7g
GAGGUAGUAGGUUGUAUGGUU	24.8	14.71	1.68593	hsa-let-7c
CAGUGCAAUGUUAAAAGGGC	6.2	3.68	1.68478	hsa-mir-130a
ACUGGACUUGGAGUCAGA	2.07	1.23	1.68293	hsa-mir-378
AUGACACGAUCACUCCCGUUGAG	2.07	1.23	1.68293	hsa-mir-425
CAGUGCAAUGUUAAAAGGG	2.07	1.23	1.68293	hsa-mir-130a
UAGGUAGUUUCAUGUUGUUGGGC	2.07	1.23	1.68293	hsa-mir-196a-1
UAGCACCAUCUGAAAUCGGUUAU	107.29	63.98	1.67693	hsa-mir-29a
AACAUUCAUUGUUGUCGGUGGGUU	65.95	39.22	1.68154	hsa-mir-181d
CUGAGGUAGUAGUUUGUACAGUU	35.89	21.33	1.68261	hsa-let-7g
UGAGGUAGUAAGUUGUAUUG	12.78	7.6	1.68158	hsa-mir-98
UGGAAGACUAGUGAUUUUGU	8.64	5.15	1.67767	hsa-mir-7-2,hsa-mir-7-1,hsa-mir-7-3
UGAGGUAGUAGAUUGUAUAGU	5644.64	3374.39	1.67279	hsa-let-7f-1,hsa-let-7f-2
UGAGGUAGUAGGUUGUAUA	1162	697.38	1.66624	hsa-let-7a-1,hsa-let-7a-2,hsa-let-7a-3
UGAGGUAGUAGGUUGU	176.07	105.65	1.66654	hsa-let-7a-3,hsa-let-7a-1,hsa-let-7c,hsa-let-7b,hsa-let-7a-2
UACCCUGUAGAUCCGAAUUUGUGU	11.84	7.11	1.66526	hsa-mir-10a
GAGGUAGUAGGUUGUGUGG	4.51	2.7	1.67037	hsa-let-7b
GUUGAGGUAGUAGGUUGUAUGGUU	4.51	2.7	1.67037	hsa-let-7c
UUUCAGUCGGAUGUUUACAGC	4.51	2.7	1.67037	hsa-mir-30e
UACCCUGUAGAUCCGAAUUUGUG	118.38	71.33	1.65961	hsa-mir-10a
CAGCAUUGUACAGGGCUAUGA	58.25	35.05	1.66191	hsa-mir-103-1,hsa-mir-103-2
GUGCAUUGUAGUUGCAUUGC	24.05	14.46	1.66321	hsa-mir-33a
CAACACCAGUCGAUGGGCUGU	19.17	11.52	1.66406	hsa-mir-21
UGAGGUAGGAGGUUGUAUAGUUGA	19.17	11.52	1.66406	hsa-let-7e
GACCUAUGAAUUGACAGCCA	2.44	1.47	1.65986	hsa-mir-192
UAAAGUGCUGACAGUGCA	2.44	1.47	1.65986	hsa-mir-106b
AACAUUCAUUGUUGUCGGUGGGU	36.83	22.31	1.65083	hsa-mir-181d
GCGGGGCUAGGGCUAACAGCA	34.76	21.08	1.64896	hsa-mir-744
UGAGGUAGUAGGUUGUAUGGUUUA	28.75	17.4	1.6523	hsa-let-7c
GAGGUAGUAGGUUGCAUAGUU	20.67	12.5	1.6536	hsa-let-7d
AACCUGGCAUACAAUGUAGAUUU	8.08	4.9	1.64898	hsa-mir-221
CAAGUCACUAGUGGUUCCGUUU	84.37	51.48	1.63889	hsa-mir-224
CUGGGAGAAGGCUGUUUACU	12.03	7.35	1.63673	hsa-mir-30c-2
UCCUUCAUUCCACCGGAGUC	6.01	3.68	1.63315	hsa-mir-205
AACAUUCAUUGUUGUCGGUGG	2.82	1.72	1.63953	hsa-mir-181d
UGAGGUAGUAGGUUGUAUGGUU	9087.41	5581.5	1.62813	hsa-let-7c
ACUGCAGUGAAGGCACUUGUAG	148.07	90.7	1.63252	hsa-mir-17
UAGCAGCACGUAAAUAUUGGCGUA	12.4	7.6	1.63158	hsa-mir-16-2
AAAGCUGGGUUGAGAGG	3.19	1.96	1.62755	hsa-mir-320b-1,hsa-mir-320a,hsa-mir-320c-1,hsa-mir-320c-2,hsa-mir-320d-1,hsa-mir-320d-2,hsa-mir-320b-2
AUGACCUAUGAAUUGACAGAC	3.19	1.96	1.62755	hsa-mir-215
ACUGGCUAGGGAAAAUGAUUGGA	7.14	4.41	1.61905	hsa-mir-664
CACGCUCAUGCACACACCCACA	3.57	2.21	1.61538	hsa-mir-574
UGAGGUAGUAGGUUGUGUG	2200.17	1366.33	1.61028	hsa-let-7b
CAAAGCACACGGCCUGCAGAGAG	143.75	89.47	1.60668	hsa-mir-330
CGCGGGUGCUUACUGACCCUU	18.98	11.77	1.61257	hsa-mir-886
AUCACAUUGCCAGGGAUUUCCA	1266.1	793.72	1.59515	hsa-mir-23a
AUAUAAUACAACCUGCUAAGUG	179.82	112.51	1.59826	hsa-mir-374b
CAAGUCACUAGUGGUUCCGUUUAG	101.66	63.73	1.59517	hsa-mir-224
UAGCACCAUCUGAAAUCGGUU	1072.18	672.38	1.5946	hsa-mir-29a
AGCUCGGUCUGAGGCCCCUCAGU	256.86	162.03	1.58526	hsa-mir-423
UUUGGCAAUGGUAGAACUCACACU	46.41	29.17	1.59102	hsa-mir-182
AAGCUGCCAGUUGAAGAACUGUU	15.97	10.05	1.58905	hsa-mir-22
UAGCAGCACGUAAAUAUUGG	10.9	6.86	1.58892	hsa-mir-16-1,hsa-mir-16-2
ACAGUAGUCUGCACAUUGGUUA	6.2	3.92	1.58163	hsa-mir-199b,hsa-mir-199a-2,hsa-mir-199a-1
AACAUUCAACGCUGUCGGUGAG	16.91	10.79	1.56719	hsa-mir-181a-1,hsa-mir-181a-2
UUCAAGUAAUCCAGGAUAGGCUGU	15.03	9.56	1.57218	hsa-mir-26a-2,hsa-mir-26a-1
AUGAGGUAGUAGAUUGUAUAGU	7.33	4.66	1.57296	hsa-let-7f-2
UAGCACCAUCUGAAAUCGGUUA	19074.5	12192.3	1.56447	hsa-mir-29a
AGGCAAGAUGCUGGCAUAGCUG	752.18	482.9	1.55763	hsa-mir-31
AACAUUCAUUGCUGUCGGUGGGUU	185.65	119.38	1.55512	hsa-mir-181b-2,hsa-mir-181b-1
GAGGUAGUAGGUUGUGUGGUU	170.43	109.33	1.55886	hsa-let-7b
CACUAGAUUGUGAGCUCCUGGA	37.2	23.78	1.56434	hsa-mir-28
CUAGACUGAAGCUCCUUGAG	23.3	14.95	1.55853	hsa-mir-151
UCGACCGGACCUCGACCGGCUCG	40.78	26.23	1.55471	hsa-mir-1307
AGCAGCAUUGUACAGGGCUAUCA	554.69	359.35	1.54359	hsa-mir-107
CAGUGCAAUGUUAAAAGGGCAU	337.48	219.63	1.53658	hsa-mir-130a
UUAUGGUUUGCCUGGGACUGA	72.91	47.31	1.54111	hsa-mir-584
AGAGGUAGUAGGUUGCAUAG	184.71	120.85	1.52842	hsa-let-7d
UGAGGUAGUAGGUUGUAUGG	127.77	83.34	1.53312	hsa-let-7c
AACUGUUUGCAGAGGAAACUGA	113.87	74.27	1.53319	hsa-mir-452
AAAGCUGGGUUGAGAGGGCGAAA	37.77	24.76	1.52544	hsa-mir-320a
CAAGCUCGUGUCUGUGGGUCCGU	8.27	5.39	1.53432	hsa-mir-99b
UUAUCAGAAUCUCCAGGGGUA	7.52	4.9	1.53469	hsa-mir-361
AGGGACGGGACGCGGUGCAGU	6.76	4.41	1.53288	hsa-mir-92b
AACAUUCAACGCUGUCGGUGA	6.39	4.17	1.53237	hsa-mir-181a-1,hsa-mir-181a-2
UGCAGUGAAGGCACUUGUAG	5.64	3.68	1.53261	hsa-mir-17
CAGCAUUGUACAGGGCUAUGAAA	4.89	3.19	1.53292	hsa-mir-103-2
GAGCUUAUUCAUAAAAGUGCAG	4.51	2.94	1.53401	hsa-mir-590
UAGCAGCACGUAAAUAUU	4.51	2.94	1.53401	hsa-mir-16-2,hsa-mir-16-1
ACCCGUAGAACCGACCUUGCG	4.13	2.7	1.52963	hsa-mir-99b
GGUAGUAGAUUGUAUAGUU	4.13	2.7	1.52963	hsa-let-7f-2,hsa-let-7f-1
AGCCUGGAAGCUGGAGCCUGCAGUG	3.01	1.96	1.53571	hsa-mir-1254
AACAUUCAACCUGUCGGUGAGUU	2.63	1.72	1.52907	hsa-mir-181c
AACUGUUUGCAGAGGAAACU	2.25	1.47	1.53061	hsa-mir-452
CGGGUCGGAGUUAGCUCAAGC	2.25	1.47	1.53061	hsa-mir-886
CUGUCUGAGCGUCGCU	2.25	1.47	1.53061	hsa-mir-1826
GAGGUAGUAGGUUGUAUGGUUU	2.25	1.47	1.53061	hsa-let-7c
UUACAGUUGUUCAACCAGUUA	2.25	1.47	1.53061	hsa-mir-582
AUACUGCCGGGUAAUGAUGGA	1.88	1.23	1.52846	hsa-mir-200c
UAAAGUGCUGACAGUGCAGAUAGU	1.88	1.23	1.52846	hsa-mir-106b
UAGCACCAUUUGAAAUCGG	1.88	1.23	1.52846	hsa-mir-29c
UCACACAGAAAUCGCACCCGUC	1.88	1.23	1.52846	hsa-mir-342
UUUCAGUCGGAUGUUUACAG	1.88	1.23	1.52846	hsa-mir-30e
UGAGGUAGUAGGUUGUAU	932	614.04	1.51782	hsa-let-7a-2,hsa-let-7a-3,hsa-let-7a-1,hsa-let-7c
UAGCAGCACAUAAUGGUUUGUG	62.76	41.18	1.52404	hsa-mir-15a
AACAUUCAUUGCUGUCGGUGGGU	53.18	35.05	1.51726	hsa-mir-181b-2,hsa-mir-181b-1
UGAGGUAGUAAGUUGUAUUGU	53.18	35.05	1.51726	hsa-mir-98
AGCAGCAUUGUACAGGGCUAUG	3042.92	2010.03	1.51387	hsa-mir-103-2,hsa-mir-103-1
UGAGGUAGUAGAUUGUAUA	578.18	384.11	1.50525	hsa-let-7f-1,hsa-let-7f-2
CAAAGCACACGGCCUGCAGAGAGG	153.33	101.24	1.51452	hsa-mir-330
CCACAGGGUAGAACCACGGA	24.43	16.18	1.50989	hsa-mir-140
AACAUUCAUUGUUGUCGGUGGG	14.47	9.56	1.5136	hsa-mir-181d
UGGUGCGGAGAGGGCCCACAGU	12.59	8.33	1.5114	hsa-mir-675b
UAGCAGCACGUAAAUAUUGGCGU	307.79	205.41	1.49842	hsa-mir-16-1,hsa-mir-16-2
UGAGGUAGUAGUUUGUGCU	157.65	104.91	1.50272	hsa-let-7i
UAAGGUGCAUCUAGUGCAGAU	15.03	10.05	1.49552	hsa-mir-18a
GUGAAAUGUUUAGGACCACUAG	51.11	34.32	1.48922	hsa-mir-203
UAGCAGCACGUAAAUAUUGGCGUU	14.28	9.56	1.49372	hsa-mir-16-1
UGGUGCGGAGAGGGCCCAC	13.53	9.07	1.49173	hsa-mir-675,hsa-mir-675b
UACUAGACUGAAGCUCCUUGAGG	6.95	4.66	1.49142	hsa-mir-151
AGGUAGUAGGUUGUGUGGUUU	6.58	4.41	1.49206	hsa-let-7b
UGAGGUAGGAGGUUGUAUAGUU	3528.27	2390.95	1.47568	hsa-let-7e
AGAGGUAGUAGGUUGCAUAGU	572.73	385.83	1.48441	hsa-let-7d
CUGUGCGUGUGACAGCGGCUGA	196.55	132.61	1.48217	hsa-mir-210
CAAAGUGCUUACAGUGCAGGU	19.54	13.24	1.47583	hsa-mir-17
AAUGACACGAUCACUCCCGUUG	5.07	3.43	1.47813	hsa-mir-425
UGAGGUAGUAGGUUGUA	316.05	214.97	1.47021	hsa-let-7a-3,hsa-let-7a-1,hsa-let-7c,hsa-let-7a-2
UAUGGCACUGGUAGAAUUCACUG	12.59	8.58	1.46737	hsa-mir-183
ACGUUGGCUCUGGUGGUGAUG	9.4	6.37	1.47567	hsa-mir-1306
AGCACCAUCUGAAAUCGGUUA	8.27	5.64	1.46631	hsa-mir-29a
GUGCAUUGCUGUUGCAUUGCA	4.7	3.19	1.47335	hsa-mir-33b
UCACAGUGAACCGGUCU	26.12	17.89	1.46003	hsa-mir-128-1,hsa-mir-128-2
GAGGUAGUAGGUUGUAUAGU	25.74	17.65	1.45836	hsa-let-7a-2,hsa-let-7a-3,hsa-let-7a-1
AAGCUCGGUCUGAGGCCCCU	3.95	2.7	1.46296	hsa-mir-423
AGCAGCAUUGUACAGGGCUAU	3724.82	2562.78	1.45343	hsa-mir-103-2,hsa-mir-103-1,hsa-mir-107
UGAGGUAGUAGUUUGUACA	29.13	20.1	1.44925	hsa-let-7g
UAUUGCACUUGUCCCGGCC	13.15	9.07	1.44983	hsa-mir-92a-2,hsa-mir-92a-1
CUGCAGUGAAGGCACUUGUAG	6.76	4.66	1.45064	hsa-mir-17
UUUUUCAUUAUUGCUCCUGACC	3.19	2.21	1.44344	hsa-mir-335
UUUCAGUCGGAUGUUUGCAGC	127.77	88.49	1.44389	hsa-mir-30a
UCCAGCAUCAGUGAUUUUGUUGA	11.27	7.84	1.4375	hsa-mir-338
ACAGUGGCUAAGUUCCG	8.83	6.13	1.44046	hsa-mir-27a
CUGGGAGGUGGAUGUUUACU	2.82	1.96	1.43878	hsa-mir-30b
UGAGGUAGUAGAUUGUAU	527.82	369.4	1.42886	hsa-let-7f-1,hsa-let-7f-2
UGUGCAAAUCCAUGCAAAACUGA	27.62	19.36	1.42665	hsa-mir-19b-2,hsa-mir-19b-1
UGGGUUUACGUUGGGAGA	17.48	12.26	1.42577	hsa-mir-629
UGAGGUAGUAGUUUGUGCUGU	823.4	581.68	1.41555	hsa-let-7i
AGCUACAUUGUCUGCUGGG	162.91	114.72	1.42007	hsa-mir-221
AGGCAAGAUGCUGGCAUAGCUGUU	41.71	29.42	1.41774	hsa-mir-31
CUAGACUGAAGCUCCUUGAGGAC	9.77	6.86	1.4242	hsa-mir-151
GGAGACUGAUGAGUUCCCGGGA	4.51	3.19	1.41379	hsa-mir-873
GCAAAGCACACGGCCUGCAGAGAG	217.97	154.18	1.41374	hsa-mir-330
ACCACAGGGUAGAACCACGGAC	159.72	113	1.41345	hsa-mir-140
UGAGGUAGUAGGUUGUAUG	57.87	41.18	1.40529	hsa-let-7c
AGGUAGUAGGUUGUAUAGUU	21.42	15.2	1.40921	hsa-let-7a-2,hsa-let-7a-3,hsa-let-7a-1
CUGUGCGUGUGACAGCGGCUGAU	17.29	12.26	1.41028	hsa-mir-210
AAGCUCGGUCUGAGGCCC	6.58	4.66	1.41202	hsa-mir-423
UACCACAGGGUAGAACCACG	4.13	2.94	1.40476	hsa-mir-140
AACGGGUAUUUAUUGAGCA	2.07	1.47	1.40816	hsa-mir-95
ACUAGACUGAAGCUCCUUGAGGA	2.07	1.47	1.40816	hsa-mir-151
UACAGUAGUCUGCACAUUGGUU	2.07	1.47	1.40816	hsa-mir-199b,hsa-mir-199a-2,hsa-mir-199a-1
UAUGGCUUUUCAUUCCUAUGUG	2.07	1.47	1.40816	hsa-mir-135b
UGAAAUGUUUAGGACCACU	2.07	1.47	1.40816	hsa-mir-203
UGAGGUAGUAGGUUGUGUGGUUU	49054.6	35077.7	1.39846	hsa-let-7b
UGAGGUAGUAGGUUGUAUAGU	12770.1	9093.9	1.40425	hsa-let-7a-3,hsa-let-7a-1,hsa-let-7a-2
UGAGGUAGUAGGUUGUAUGGU	742.22	531.43	1.39665	hsa-let-7c
CACCCGUAGAACCGACCUUGCG	401.36	287.53	1.39589	hsa-mir-99b
AGCUACAUCUGGCUACUGG	19.17	13.73	1.39621	hsa-mir-222
AGCAGCAUUGUACAGGGCUAUC	454.35	326.51	1.39153	hsa-mir-107
AGAGGUAGUAGGUUGCAUA	101.84	73.29	1.38955	hsa-let-7d
AUGACCUAUGAAUUGACAGACA	12.59	9.07	1.38809	hsa-mir-215
UGCGGGGCUAGGGCUAACAGCAGU	5.45	3.92	1.39031	hsa-mir-744
AACAUUCAACGCUGUCGGU	3.76	2.7	1.39259	hsa-mir-181a-1,hsa-mir-181a-2
AGCUCGGUCUGAGGCCCCUCAG	40.21	29.17	1.37847	hsa-mir-423
UAUUGCACUUGUCCCGGC	15.22	11.03	1.37987	hsa-mir-92a-1,hsa-mir-92a-2
AAUCACAUUGCCAGGGAUUUCCA	3.38	2.45	1.37959	hsa-mir-23a
UACCCUGUAGAUCCGAAU	3.38	2.45	1.37959	hsa-mir-10a
CGGGUCGGAGUUAGCUCAAGCGG	312.3	227.72	1.37142	hsa-mir-886
UAGCAGCGGGAACAGUUCUGCA	10.71	7.84	1.36607	hsa-mir-503
GUGAGGUAGUAGGUUGUAUAG	8.08	5.88	1.37415	hsa-let-7a-3
CAACGGAAUCCCAAAAGCAGCUG	3060.02	2251.47	1.35912	hsa-mir-191
UGUUUGCAGAGGAAACUGAGAC	83.62	61.28	1.36456	hsa-mir-452
GCAAAGCACACGGCCUGCAGAGAGG	75.91	55.89	1.3582	hsa-mir-330
UGAAAUGUUUAGGACCACUAG	58.63	43.14	1.35906	hsa-mir-203
UUCAAGUAAUCCAGGAUAGGCUG	12.03	8.82	1.36395	hsa-mir-26a-2,hsa-mir-26a-1
UCUCACACAGAAAUCGCACCCGUCA	9.02	6.62	1.36254	hsa-mir-342
AAGCUCGGUCUGAGGCC	8.64	6.37	1.35636	hsa-mir-423
UUAUGGUUUGCCUGGGACUGAG	3.01	2.21	1.36199	hsa-mir-584
UAUUGCACUCGUCCCGGCCUCC	301.59	224.04	1.34614	hsa-mir-92b
CACCCGUAGAACCGACCUUGC	75.35	55.64	1.35424	hsa-mir-99b
UUCACAGUGGCUAAGUUCC	62.57	46.33	1.35053	hsa-mir-27a
AGGGACGGGACGCGGUGCAGUGU	34.2	25.25	1.35446	hsa-mir-92b
AAGUAAUUCAGGAUAGGUU	26.49	19.61	1.35084	hsa-mir-26b
AGCAGCAUUGUACAGGG	21.23	15.69	1.35309	hsa-mir-107,hsa-mir-103-2,hsa-mir-103-1
UUGAGGUAGUAGGUUGU	8.27	6.13	1.3491	hsa-let-7c,hsa-let-7a-2
ACAUUGCCAGGGAUUUCCA	6.95	5.15	1.34951	hsa-mir-23a
AGCAGCAUUGUACAGGGCU	64.64	48.29	1.33858	hsa-mir-103-1,hsa-mir-107,hsa-mir-103-2
UAGCACCAUCUGAAAUCG	28.94	21.57	1.34168	hsa-mir-29a
UUGCAGCUGCCUGGGAGUGACUU	23.3	17.4	1.33908	hsa-mir-1301
ACGGGUUAGGCUCUUGGGAG	2.63	1.96	1.34184	hsa-mir-125b-1
UGUAAACAUCCUCGACUGGAAGCUG	2.63	1.96	1.34184	hsa-mir-30a
CAACGGAAUCCCAAAAGCAGCUGU	2790.19	2091.41	1.33412	hsa-mir-191
AACUGUUUGCAGAGGAAACUGAG	382.76	287.04	1.33347	hsa-mir-452
AGCUACAUCUGGCUACUGGGUC	261.94	197.33	1.32742	hsa-mir-222
UAUGUGCCUUUGGACUACAUCG	4.89	3.68	1.3288	hsa-mir-455
UGAGGUAGUAGGUUGUGUGGUU	127670	96360.2	1.32493	hsa-let-7b
UAUUGCACUUGUCCCGGCCUGU	1705.42	1290.83	1.32118	hsa-mir-92a-2,hsa-mir-92a-1
UUCAAGUAAUUCAGGAUAGGUU	953.05	721.16	1.32155	hsa-mir-26b
UAUUGCACUCGUCCCGGCCUC	248.41	187.77	1.32295	hsa-mir-92b
CAUGCCUUGAGUGUAGGACCGU	33.07	25	1.3228	hsa-mir-532
UCACAUUGCCAGGGAUUACCAC	8.08	6.13	1.31811	hsa-mir-23b
AACAUUCAACGCUGUCGGUG	7.14	5.39	1.32468	hsa-mir-181a-1,hsa-mir-181a-2
GUACAGUACUGUGAUAACUG	3.57	2.7	1.32222	hsa-mir-101-2,hsa-mir-101-1
UGAGGUAGUAGAUUGUAUAG	879.39	672.62	1.30741	hsa-let-7f-2,hsa-let-7f-1
UGAGGGGCAGAGAGCGAGACUUUU	206.88	157.37	1.31461	hsa-mir-423
UCACAGUGAACCGGUCUCUUUU	159.34	121.83	1.30789	hsa-mir-128-1
UGAGGGGCAGAGAGCGAGAC	16.35	12.5	1.308	hsa-mir-423
AUGAGGUAGUAGGUUGU	6.76	5.15	1.31262	hsa-let-7a-1
AGCUCGGUCUGAGGCCCC	5.45	4.17	1.30695	hsa-mir-423
AACAUUCAUUGCUGUCGG	2.25	1.72	1.30814	hsa-mir-181b-1,hsa-mir-181b-2
ACAUUGCCAGGGAUUUCCAA	2.25	1.72	1.30814	hsa-mir-23a
ACCGUGGCUUUCGAUUGUUACU	2.25	1.72	1.30814	hsa-mir-132
CACUAGAUUGUGAGCUCCUGGAG	2.25	1.72	1.30814	hsa-mir-28
GUGAAAUGUUUAGGACCACU	2.25	1.72	1.30814	hsa-mir-203
UCGGGGUUUUGAGGGCGAGAUG	2.25	1.72	1.30814	hsa-mir-193b
UUAUUGCUUAAGAAUACGCGUAG	2.25	1.72	1.30814	hsa-mir-137
UGAGGUAGUAGUUUGUACAGU	636.43	490.74	1.29688	hsa-let-7g
CUGACCUAUGAAUUGACAGCCA	481.97	370.14	1.30213	hsa-mir-192
UAACACUGUCUGGUAACGAUGUU	281.29	215.71	1.30402	hsa-mir-200a
AGCUACAUCUGGCUACUGGGU	246.91	189.97	1.29973	hsa-mir-222
CAACGGAAUCCCAAAAGCAGCUGUU	159.34	122.32	1.30265	hsa-mir-191
CAGUGCAAUGAUGAAAGGGCAU	120.45	92.9	1.29656	hsa-mir-130b
UGGUGCGGAGAGGGCCCA	25.55	19.61	1.30291	hsa-mir-675b
UGCUGGAUCAGUGGUUCGAGUC	9.58	7.35	1.3034	hsa-mir-1287
AGCUCGGUCUGAGGCCCCU	6.39	4.9	1.30408	hsa-mir-423
UUCAAGUAAUCCAGGAUA	3.19	2.45	1.30204	hsa-mir-26a-1,hsa-mir-26a-2
UAUGGCACUGGUAGAAUUCACU	8.83	6.86	1.28717	hsa-mir-183
AUAUAAUACAACCUGCUAAGUGU	6.01	4.66	1.2897	hsa-mir-374b
UUACAGUUGUUCAACCAGUUACU	6.01	4.66	1.2897	hsa-mir-582
GCAAAGCACACGGCCUGCAGAGA	448.53	349.06	1.28497	hsa-mir-330
UGAGGUAGUAGUUUGUGCUG	191.85	150.26	1.27679	hsa-let-7i
UGCGGGGCUAGGGCUAACAGC	79.3	62.02	1.27862	hsa-mir-744
CUUUCAGUCGGAUGUUUACA	3.76	2.94	1.27891	hsa-mir-30e
UAACACUGUCUGGUAACGAU	2.82	2.21	1.27602	hsa-mir-200a
AACAUUCAUUGUUGUCGGUG	1.88	1.47	1.27891	hsa-mir-181d
AAGAUGUGGAAAAAUUGGAAUCC	1.88	1.47	1.27891	hsa-mir-576
UAACACUGUCUGGUAAAGAU	1.88	1.47	1.27891	hsa-mir-141
UACAGUUGUUCAACCAGUUACU	1.88	1.47	1.27891	hsa-mir-582
UCAGAACAAAUGCCGGUUCCCA	1.88	1.47	1.27891	hsa-mir-589
UGAGACCUCUGGGUUCUGAGC	1.88	1.47	1.27891	hsa-mir-769
UAGCAGCACGUAAAUAUUGGC	30.44	24.02	1.26728	hsa-mir-16-2,hsa-mir-16-1
AACAUUCAACGCUGUCGGUGAGU	24.05	18.87	1.27451	hsa-mir-181a-2,hsa-mir-181a-1
UAAUACUGCCUGGUAAUGAUGACG	16.54	12.99	1.27329	hsa-mir-200b
AGGUAGUAGGUUGUGUGGUU	10.9	8.58	1.2704	hsa-let-7b
CUUUCAGUCGGAUGUUUGCAG	132.85	105.65	1.25745	hsa-mir-30a
AAUGACACGAUCACUCCCGUUGAG	5.26	4.17	1.26139	hsa-mir-425
ACGUUGGCUCUGGUGGUGAU	4.32	3.43	1.25948	hsa-mir-1306
UGAGGUAGUAGGUUGUGUGG	2948.97	2359.57	1.24979	hsa-let-7b
UGGAGAGAAAGGCAGUUCCUGAU	815.69	652.52	1.25006	hsa-mir-185
UGAGGUAGGAGGUUGUAUAGUUG	225.3	179.92	1.25222	hsa-let-7e
UGAGGUAGUAGAUUGUA	177.95	142.17	1.25167	hsa-let-7f-1,hsa-let-7f-2
ACCACAGGGUAGAACCACGG	97.33	77.95	1.24862	hsa-mir-140
ACCACAGGGUAGAACCACGGACA	93.76	74.76	1.25415	hsa-mir-140
AAAGCACACGGCCUGCAGAGAGG	55.06	44.12	1.24796	hsa-mir-330
UGGAGAGAAAGGCAGUUC	35.51	28.43	1.24903	hsa-mir-185
AAGCUGGGUUGAGAGGGCGAAA	23.68	18.87	1.2549	hsa-mir-320a
AACUGUUUGCAGAGGAAACUG	6.76	5.39	1.25417	hsa-mir-452
CGGGUCGGAGUUAGCUCAAGCG	5.83	4.66	1.25107	hsa-mir-886
GUGAAAUGUUUAGGACCACUAGA	4.89	3.92	1.24745	hsa-mir-203
CAUCCCUUGCAUGGUGGAGGGU	2.44	1.96	1.2449	hsa-mir-188
UAUUGCACUUGUCCCGG	2.44	1.96	1.2449	hsa-mir-92a-1,hsa-mir-92a-2
UCACAUUGCCAGGGAUUUCCA	2.44	1.96	1.2449	hsa-mir-23a
UGAGGUAGUAGGUUGUAUAG	1891.07	1525.41	1.23971	hsa-let-7a-1,hsa-let-7a-2,hsa-let-7a-3
AACAUUCAACGCUGUCGGUGAGUUU	114.81	92.41	1.2424	hsa-mir-181a-2,hsa-mir-181a-1
UAAAGUGCUUAUAGUGCAGGUA	60.88	49.27	1.23564	hsa-mir-20a
UGAGGUAGUAGGUUGUGUGGUUUCA	18.23	14.71	1.23929	hsa-let-7b
AAAGUGCUGUUCGUGCAGGUAG	10.9	8.82	1.23583	hsa-mir-93
AAGGAGCUCACAGUCUAUUGA	5.45	4.41	1.23583	hsa-mir-28
AAAAGCUGGGUUGAGAGGGCGAAAAA	3.95	3.19	1.23824	hsa-mir-320a
UGAGGUAGUAGGUUGUGUGGUUUC	68.77	55.89	1.23045	hsa-let-7b
AGGCAAGAUGCUGGCAUAGC	24.99	20.35	1.22801	hsa-mir-31
UUCAACGGGUAUUUAUUGAG	9.02	7.35	1.22721	hsa-mir-95
AAGCUCGGUCUGAGGCCCCUCAG	8.46	6.86	1.23324	hsa-mir-423
AUCGGGAAUGUCGUGUCCGC	3.01	2.45	1.22857	hsa-mir-425
AUGAGGUAGUAGAUUGUAUAGUUU	3.01	2.45	1.22857	hsa-let-7f-2
UCAGUGCAUCACAGAA	3.01	2.45	1.22857	hsa-mir-148b
UAGCUUAUCAGACUGAUGUUGACU	696.94	571.14	1.22026	hsa-mir-21
UUAUAAAGCAAUGAGACUGAUU	162.72	133.84	1.21578	hsa-mir-340
CAAAGUGCUGUUCGUGCAGG	6.58	5.39	1.22078	hsa-mir-93
UGUAAACAUCCUCGACUGGAAGC	1373.77	1135.91	1.2094	hsa-mir-30a
UGAGGUAGUAGUUUGUACAG	57.69	47.55	1.21325	hsa-let-7g
CAACGGAAUCCCAAAAG	23.68	19.61	1.20755	hsa-mir-191
CAAAGUGCUUACAGUGCAGG	5.64	4.66	1.2103	hsa-mir-17
ACUGGACUUGGAGUCAGAAGGCC	3.57	2.94	1.21429	hsa-mir-378
UUCAGUCGGAUGUUUGCAGC	3.57	2.94	1.21429	hsa-mir-30a
UAGCAGCACGUAAAUAUUGGCG	965.45	803.03	1.20226	hsa-mir-16-1,hsa-mir-16-2
UGCGGGGCUAGGGCUAACAGCA	589.64	490.5	1.20212	hsa-mir-744
CAAAGCACACGGCCUGCAGAGA	74.97	62.26	1.20414	hsa-mir-330
CAACGGAAUCCCAAAAGCAG	48.67	40.69	1.19612	hsa-mir-191
CCGCACUGUGGGUACUUGCUG	17.66	14.71	1.20054	hsa-mir-106b
AUGGCACUGGUAGAAUUCACUG	6.2	5.15	1.20388	hsa-mir-183
AGGGACGGGACGCGGUGCAGUG	4.7	3.92	1.19898	hsa-mir-92b
UAACACUGUCUGGUAAAGAUGGC	2.07	1.72	1.20349	hsa-mir-141
UAUUGCACUCGUCCCGGCCU	290.88	245.37	1.18547	hsa-mir-92b
CAAAGUGCUUACAGUGCAGGUA	46.22	38.97	1.18604	hsa-mir-17
UGGUGCGGAGAGGGCCCACAGUG	36.83	30.89	1.1923	hsa-mir-675b
UGGAGAGAAAGGCAGUUCC	26.87	22.55	1.19157	hsa-mir-185
UACCCUGUAGAUCCGAAUUUG	5.83	4.9	1.1898	hsa-mir-10a
GGGUGGUCUGGAGAUUUGUGCA	2.63	2.21	1.19005	hsa-mir-1293
UCAGUCGGAUGUUUGCAGC	2.63	2.21	1.19005	hsa-mir-30a
UUGAGGUAGUAGGUUGUAUAG	2.63	2.21	1.19005	hsa-let-7a-2
AACAUUCAACGCUGUCGGUGAGUU	57.12	48.29	1.18285	hsa-mir-181a-1,hsa-mir-181a-2
UGCGGGGCUAGGGCUAACAGCAG	13.34	11.28	1.18262	hsa-mir-744
CAAGCUCGUGUCUGUGGGUCCG	6.39	5.39	1.18553	hsa-mir-99b
UGAGGGGCAGAGAGCGA	4.32	3.68	1.17391	hsa-mir-423
ACUAGAUUGUGAGCUCCUGGAG	3.19	2.7	1.18148	hsa-mir-28
AGCAGCAUUGUACAGG	3.19	2.7	1.18148	hsa-mir-107,hsa-mir-103-2,hsa-mir-103-1
UAACACUGUCUGGUAAAGAUGG	3.19	2.7	1.18148	hsa-mir-141
AGCUACAUCUGGCUACUGGGUCU	2100.77	1789.17	1.17416	hsa-mir-222
UAGUACUGUGCAUAUCAUCUAU	24.05	20.59	1.16804	hsa-mir-1278
UAUUGCACUCGUCCCGGC	23.49	20.1	1.16866	hsa-mir-92b
UGGUGCGGAGAGGGCCCACA	6.01	5.15	1.16699	hsa-mir-675,hsa-mir-675b
UGGAGAGAAAGGCAGUU	44.72	38.48	1.16216	hsa-mir-185
AACCCGUAGAUCCGAACUUGU	27.25	23.53	1.1581	hsa-mir-100
UUAUAAAGCAAUGAGACUGA	8.27	7.11	1.16315	hsa-mir-340
CUGGCUAGGGAAAAUGAUUGGA	7.7	6.62	1.16314	hsa-mir-664
UGAGGGGCAGAGAGCGAGACUUU	840.31	732.92	1.14652	hsa-mir-423
CUAGCACCAUCUGAAAUCGGUUA	117.82	102.46	1.14991	hsa-mir-29a
CAUUGCACUUGUCUCGGUC	28.94	25.25	1.14614	hsa-mir-25
UAGGUAGUUUCAUGUUGUUG	5.07	4.41	1.14966	hsa-mir-196a-2,hsa-mir-196a-1
UGGUGCGGAGAGGGCCCACAG	5.07	4.41	1.14966	hsa-mir-675,hsa-mir-675b
AAAGCUGGGUUGAGAGGGCA	3.38	2.94	1.14966	hsa-mir-320b-2,hsa-mir-320b-1
UCCUGUACUGAGCUGCCCCGAG	3.38	2.94	1.14966	hsa-mir-486
AAAUGCUCAGACUCCUGUGGUG	2.82	2.45	1.15102	hsa-mir-105-1,hsa-mir-105-2
CUUUCAGUCGGAUGUUUG	2.82	2.45	1.15102	hsa-mir-30a
CAUCCCUUGCAUGGUGGAGGG	2.25	1.96	1.14796	hsa-mir-188
CCCGGGUCGGAGUUAGCUCAAGCGGU	2.25	1.96	1.14796	hsa-mir-886
UUUGGCAAUGGUAGAACUCA	2.25	1.96	1.14796	hsa-mir-182
UGAGGUAGUAGGUUGUGUGGU	12372.5	10805.9	1.14499	hsa-let-7b
ACCACAGGGUAGAACCACGGA	1124.98	986.87	1.13995	hsa-mir-140
UCACAGUGAACCGGUCUCUUU	752.18	657.43	1.14412	hsa-mir-128-1,hsa-mir-128-2
UGAGGGGCAGAGAGCGAGACUU	90.57	79.18	1.14385	hsa-mir-423
UGUAAACAUCCUACACUCUCAGCU	66.71	58.34	1.14347	hsa-mir-30c-1,hsa-mir-30c-2
UAUUGCACUCGUCCCGGCC	49.23	43.14	1.14117	hsa-mir-92b
CAACGGAAUCCCAAAAGCAGC	44.53	39.22	1.13539	hsa-mir-191
UGAGGGGCAGAGAGCGAGACU	44.35	38.97	1.13805	hsa-mir-423
AAGCUGGGUUGAGAGGGCGA	36.27	31.87	1.13806	hsa-mir-320a
AAAGCACACGGCCUGCAGAGAG	21.05	18.38	1.14527	hsa-mir-330
UGUAAACAUCCUCGAC	7.52	6.62	1.13595	hsa-mir-30a
CGGGUCGGAGUUAGCUCAAGCGGU	674.76	598.6	1.12723	hsa-mir-886
UCCUUCAUUCCACCGGAGUCUG	156.52	138.01	1.13412	hsa-mir-205
GGCUCAGUUCAGCAGGAACAG	11.09	9.81	1.13048	hsa-mir-24-1,hsa-mir-24-2
CUCGAGGAGCUCACAGUCUAGU	6.39	5.64	1.13298	hsa-mir-151
UGAAAUGUUUAGGACCACUA	5.26	4.66	1.12876	hsa-mir-203
UGAGGUAGGAGGUUGUAUAGU	371.86	331.41	1.12205	hsa-let-7e
UCCUUCAUUCCACCGGAGUCUGU	285.43	255.42	1.11749	hsa-mir-205
UGGAGAGAAAGGCAGUUCCUG	169.3	151.24	1.11941	hsa-mir-185
AGCUACAUUGUCUGCUGGGU	115.94	103.44	1.12084	hsa-mir-221
UCGAGGAGCUCACAGUCUAGUA	79.86	71.58	1.11567	hsa-mir-151
AACGGAAUCCCAAAAGCAGCUGUU	13.15	11.77	1.11725	hsa-mir-191
UUUGGCAAUGGUAGAACUCACA	7.7	6.86	1.12245	hsa-mir-182
CAUUGCACUUGUCUCGGUCUG	822.83	741.99	1.10895	hsa-mir-25
UAUUGCACUUGUCCCGGCCU	65.95	59.32	1.11177	hsa-mir-92a-1,hsa-mir-92a-2
UGGUGCGGAGAGGGCCC	5.45	4.9	1.11224	hsa-mir-675,hsa-mir-675b
CACCCGUAGAACCGACCUUG	2.44	2.21	1.10407	hsa-mir-99b
UCGAGGAGCUCACAGUCUAGU	68.77	62.75	1.09594	hsa-mir-151
CUUUCAGUCGGAUGUUUACAG	40.02	36.52	1.09584	hsa-mir-30e
AGCUACAUCUGGCUACUG	35.7	32.36	1.10321	hsa-mir-222
UGAGCGCCUCGACGACAGAGC	12.4	11.28	1.09929	hsa-mir-339
CACCCGUAGAACCGACCUUGCGG	6.76	6.13	1.10277	hsa-mir-99b
ACCCUGUAGAUCCGAAUUUGUGU	1.88	1.72	1.09302	hsa-mir-10a
AGGGACGGGACGCGGUGCAG	1.88	1.72	1.09302	hsa-mir-92b
CUGGGAGAAGGCUGUUUA	1.88	1.72	1.09302	hsa-mir-30c-2
UAGGUAGUUUCCUGUUGUUG	1.88	1.72	1.09302	hsa-mir-196b
UGACCUAUGAAUUGACAG	1.88	1.72	1.09302	hsa-mir-215,hsa-mir-192
UGAGAACCACGUCUGCUCUGAGC	1.88	1.72	1.09302	hsa-mir-589
GCAAAGCACACGGCCUGCAGAG	64.64	59.32	1.08968	hsa-mir-330
AAAAGCUGGGUUGAGAGGGCGAAAA	20.29	18.63	1.0891	hsa-mir-320a
CUUUCAGUCGGAUGUUUGCA	8.83	8.09	1.09147	hsa-mir-30a
ACUGCAGUGAAGGCACUUGUA	6.39	5.88	1.08673	hsa-mir-17
AACGGAAUCCCAAAAGCAG	3.19	2.94	1.08503	hsa-mir-191
UGCUGGAUCAGUGGUUCGAGU	3.19	2.94	1.08503	hsa-mir-1287
AAAGCACACGGCCUGCAGAGA	12.21	11.28	1.08245	hsa-mir-330
UGAGGGGCAGAGAGCGAGA	9.77	9.07	1.07718	hsa-mir-423
UGGAGUGUGACAAUGGUGUUUG	5.83	5.39	1.08163	hsa-mir-122
AACCCGUAGAUCCGAACUUGUG	225.86	210.32	1.07389	hsa-mir-100
AAAAGCUGGGUUGAGAGGGCGAAA	186.96	174.77	1.06975	hsa-mir-320a
UUCACAGUGGCUAAGUUCUGCA	72.53	67.65	1.07214	hsa-mir-27b
UGAGGUAGGAGGUUGUAU	31.57	29.42	1.07308	hsa-let-7e
UAAUACUGUCUGGUAAAACCGU	30.25	28.19	1.07308	hsa-mir-429
CAUUGCACUUGUCUCGG	17.85	16.67	1.07079	hsa-mir-25
AACAGUCUACAGCCAUGGUCG	2.63	2.45	1.07347	hsa-mir-132
ACCAUCUGAAAUCGGUUA	2.63	2.45	1.07347	hsa-mir-29a
AGGGGCAGAGAGCGAGACUUUU	2.63	2.45	1.07347	hsa-mir-423
AUACUGCCUGGUAAUGAUGACG	2.63	2.45	1.07347	hsa-mir-200b
AUGAGGUAGUAGGUUGUAUAGUU	2.63	2.45	1.07347	hsa-let-7a-1
GCAGGAACUUGUGAGUCUCCUAU	2.63	2.45	1.07347	hsa-mir-873
UUCAGUCGGAUGUUUGCAG	2.63	2.45	1.07347	hsa-mir-30a
AGCUACAUCUGGCUACUGGG	49.79	47.06	1.05801	hsa-mir-222
UGGAGAGAAAGGCAGUUCCUGA	5214.34	4974.81	1.04815	hsa-mir-185
UAUUGCACUUGUCCCGGCCUG	111.99	106.63	1.05027	hsa-mir-92a-2,hsa-mir-92a-1
CAAAGAAUUCUCCUUUUGGG	19.35	18.38	1.05277	hsa-mir-186
CCGCACUGUGGGUACUUGCUGC	16.72	15.93	1.04959	hsa-mir-106b
UAGCUUAUCAGACUGAUGUUGACUGU	10.33	9.81	1.05301	hsa-mir-21
AGCUCGGUCUGAGGCCCCUC	4.89	4.66	1.04936	hsa-mir-423
CACCCGUAGAACCGACC	2.07	1.96	1.05612	hsa-mir-99b
UAGCAGCGGGAACAGUUC	2.07	1.96	1.05612	hsa-mir-503
UCAGUGCAUGACAGAACUU	2.07	1.96	1.05612	hsa-mir-152
AAGCUGGGUUGAGAGGGCGAA	43.97	42.41	1.03678	hsa-mir-320a
UGGCUCAGUUCAGCAGGAA	22.74	21.82	1.04216	hsa-mir-24-2,hsa-mir-24-1
CUGACCUAUGAAUUGACAGCC	382.38	372.1	1.02763	hsa-mir-192
AGUUCUUCAGUGGCAAGCUUU	17.1	16.67	1.02579	hsa-mir-22
AUCAACAGACAUUAAUUGGGCGC	15.41	14.95	1.03077	hsa-mir-421
UGAGGUAGUAAGUUGUAUU	7.33	7.11	1.03094	hsa-mir-98
ACUGGCUAGGGAAAAUGAUUGG	6.58	6.37	1.03297	hsa-mir-664
UAAAGUGCUGACAGUGCAGAUAG	5.07	4.9	1.03469	hsa-mir-106b
UGAGGUAGGAGGUUGUAUA	19.54	19.12	1.02197	hsa-let-7e
UUGCAGCUGCCUGGGAGUGACUUC	14.47	14.22	1.01758	hsa-mir-1301
UUAUCAGAAUCUCCAGGGGUAC	8.27	8.09	1.02225	hsa-mir-361
UUGCAGCUGCCUGGGAGUGACUUCA	4.51	4.41	1.02268	hsa-mir-1301
GUGCAUUGCUGUUGCAUUG	3.76	3.68	1.02174	hsa-mir-33b
ACGGUGCUGGAUGUGGCCUUU	2.25	2.21	1.0181	hsa-mir-1250
AGACUGAAGCUCCUUGAGGAC	2.25	2.21	1.0181	hsa-mir-151
CUUUCAGUCGGAUGUUUGCAGCU	2.25	2.21	1.0181	hsa-mir-30a
UCGUACCGUGAGUAAUAAUGCG	2.25	2.21	1.0181	hsa-mir-126
UGUAAACAUCCUCGACUGGAAG	375.06	373.08	1.00531	hsa-mir-30a
UCCCUGAGACCCUAACUUGUGA	70.65	70.11	1.0077	hsa-mir-125b-2,hsa-mir-125b-1
UACUAGACUGAAGCUCCUUGAGGA	3.95	3.92	1.00765	hsa-mir-151
UUGCAUAUGUAGGAUGUCCC	3.95	3.92	1.00765	hsa-mir-448
CACCCGGCUGUGUGCACAUGUGC	25.37	25.25	1.00475	hsa-mir-941-1,hsa-mir-941-2,hsa-mir-941-3,hsa-mir-941-4
AAUGACACGAUCACUCCCGUUGA	20.11	20.1	1.0005	hsa-mir-425
UAGCAGCGGGAACAGUUCUGCAG	17.48	17.4	1.0046	hsa-mir-503
CUGACCUAUGAAUUGACAG	4.89	4.9	0.997959	hsa-mir-192
UGAGGGGCAGAGAGCGAG	4.89	4.9	0.997959	hsa-mir-423
GUAGCUUAUCAGACUGAUGUU	3.19	3.19	1	hsa-mir-21
UACCCUGUAGAUCCGAAUU	2.44	2.45	0.995918	hsa-mir-10a
UAAAGUGCUGACAGUGCAGAUA	255.36	257.14	0.993078	hsa-mir-106b
UGAGAACUGAAUUCCAUAGGCUGU	173.44	174.77	0.99239	hsa-mir-146b
UGAGAACCACGUCUGCUCUGA	11.84	12.01	0.985845	hsa-mir-589
AACACUGUCUGGUAACGAUGUU	5.83	5.88	0.991497	hsa-mir-200a
GCAGGAACUUGUGAGUCUCCUA	4.13	4.17	0.990408	hsa-mir-873
AGAGCUUAGCUGAUUGGUGAACAG	3.38	3.43	0.985423	hsa-mir-27b
GUAGCUUAUCAGACUGAUGUUGACU	3.38	3.43	0.985423	hsa-mir-21
UGAGGUAGUAGUUUGUAC	62.2	63.24	0.983555	hsa-let-7g
UGAGGUAGGAGGUUGU	2.63	2.7	0.974074	hsa-let-7e
UAAAGUGCUGACAGUGCAGAU	144.31	148.3	0.973095	hsa-mir-106b
UGAGGUAGGAGGUUGUAUAG	70.09	72.31	0.969299	hsa-let-7e
AUCACAUUGCCAGGGAUU	29.5	30.4	0.970395	hsa-mir-23a,hsa-mir-23b
UCUCACACAGAAAUCGCACCCGUC	28.56	29.42	0.970768	hsa-mir-342
UGUUUGCAGAGGAAACUGAGA	20.48	21.08	0.971537	hsa-mir-452
UAGCUUAUCAGACUGAUGUUGACUG	8.83	9.07	0.973539	hsa-mir-21
CAGUGCAAUGAUGAAAGGGCA	8.08	8.33	0.969988	hsa-mir-130b
AAUGCACCUGGGCAAGGAUUCAG	6.2	6.37	0.973312	hsa-mir-502
AGGAGGAAUUGGUGCUGGUCUU	6.2	6.37	0.973312	hsa-mir-766
GCAAAGCACACGGCCUGC	3.57	3.68	0.970109	hsa-mir-330
CAUUGCACUUGUCUCGGUCUGA	4153.99	4322.54	0.961007	hsa-mir-25
GCAAAGCACACGGCCUGCAGA	28.94	30.15	0.959867	hsa-mir-330
ACCUGGCAUACAAUGUAGAUU	5.64	5.88	0.959184	hsa-mir-221
UCACAGUGAACCGGUCUC	5.64	5.88	0.959184	hsa-mir-128-2,hsa-mir-128-1
UUAAGACUUGCAGUGAUGUUUA	4.7	4.9	0.959184	hsa-mir-499
CCAAAGAAUUCUCCUUUUGGGCU	3.76	3.92	0.959184	hsa-mir-186
UAGCACCAUCUGAAAUC	3.76	3.92	0.959184	hsa-mir-29a
CAAAGAAUUCUCCUUUUGG	2.82	2.94	0.959184	hsa-mir-186
ACGGAAUCCCAAAAGCAGCUGU	1.88	1.96	0.959184	hsa-mir-191
ACUCGGCGUGGCGUCGGUC	1.88	1.96	0.959184	hsa-mir-1307
AGGUAGUUUCAUGUUGUUGGG	1.88	1.96	0.959184	hsa-mir-196a-2,hsa-mir-196a-1
AUACUGCCUGGUAAUGAUGACGG	1.88	1.96	0.959184	hsa-mir-200b
CAACGGAAUCCCAAAAGCAGCU	386.14	405.19	0.952985	hsa-mir-191
CUUUCAGUCGGAUGUUUGCAGC	188.28	197.33	0.954138	hsa-mir-30a
CAAAGUGCUGUUCGUGCAGGUA	97.9	102.95	0.950947	hsa-mir-93
UGCGGGGCUAGGGCUAACAG	36.83	38.73	0.950942	hsa-mir-744
CUGGCUCAGUUCAGCAGGAACA	3.95	4.17	0.947242	hsa-mir-24-2,hsa-mir-24-1
AACUGUUUGCAGAGGAAACUGAGA	207.26	220.61	0.939486	hsa-mir-452
AAGCUGCCAGUUGAAGAACUGU	185.27	198.06	0.935424	hsa-mir-22
UGUGCAAAUCCAUGCAAAACUG	16.54	17.65	0.93711	hsa-mir-19b-2,hsa-mir-19b-1
UCAACGGGUAUUUAUUGAGCA	9.21	9.81	0.938838	hsa-mir-95
UCGAGGAGCUCACAGUCUAGUAU	7.14	7.6	0.939474	hsa-mir-151
CUGUUUGCAGAGGAAACUGAGA	4.13	4.41	0.936508	hsa-mir-452
AUAUUGCACUCGUCCCGGCCUCC	3.01	3.19	0.943574	hsa-mir-92b
CAGCAGCACACUGUGGUUUGUA	3.01	3.19	0.943574	hsa-mir-497
ACCCUGUAGAUCCGAAUUUGU	2.07	2.21	0.936652	hsa-mir-10a
UACCACAGGGUAGAACCA	2.07	2.21	0.936652	hsa-mir-140
UGUAAACAUCCUUGACUGGAAGCU	228.49	245.62	0.930258	hsa-mir-30e
AACGGAAUCCCAAAAGCAGCUGU	217.4	233.11	0.932607	hsa-mir-191
CUUUCAGUCGGAUGUUUACAGC	42.47	45.59	0.931564	hsa-mir-30e
AGCUACAUCUGGCUACU	27.62	29.66	0.93122	hsa-mir-222
AUCAACAGACAUUAAUUGGGCG	19.17	20.59	0.931034	hsa-mir-421
AGUUCUUCAGUGGCAAGCUUUA	15.97	17.16	0.930653	hsa-mir-22
UGACCUAUGAAUUGACAGCCA	158.4	171.34	0.924478	hsa-mir-192
UGGAGAGAAAGGCAGUUCCU	100.34	109.08	0.919875	hsa-mir-185
AACCCGUAGAUCCGAUCUUGUG	88.69	96.33	0.920689	hsa-mir-99a
UUCACAGUGGCUAAGUUCUG	56.37	61.53	0.916138	hsa-mir-27b
UUCAAGUAAUUCAGGAUAGG	23.3	25.25	0.922772	hsa-mir-26b
UGAGGUAGGAGGUUGUA	14.47	15.69	0.922243	hsa-let-7e
CGAAUCAUUAUUUGCUGCUCU	4.51	4.9	0.920408	hsa-mir-15b
AACCCGUAGAUCCGAACUUGUGG	3.38	3.68	0.918478	hsa-mir-100
CAACACCAGUCGAUGGGCUG	2.25	2.45	0.918367	hsa-mir-21
CAGUUACCGCUUCCGCUACCG	2.25	2.45	0.918367	hsa-mir-935
UAGAGGAGAUGGCGCAGGGGACA	2.25	2.45	0.918367	hsa-mir-877
UAGUACUGUGCAUAUCAUCU	2.25	2.45	0.918367	hsa-mir-1278
AGCUACAUCUGGCUACUGGGUCUC	714.22	783.67	0.911379	hsa-mir-222
UAGCACCAUCUGAAAUCGGU	46.41	50.99	0.910178	hsa-mir-29a
UGAGCGCCUCGACGACAGAGCCG	27.81	30.4	0.914803	hsa-mir-339
CAAGUCACUAGUGGUUCCGUU	7.33	8.09	0.906057	hsa-mir-224
UCCCUGAGACCCUAACUUGUG	7.14	7.84	0.910714	hsa-mir-125b-2,hsa-mir-125b-1
UCCCUGAGACCCUUUAACCUGU	7.14	7.84	0.910714	hsa-mir-125a
ACCCUGUAGAUCCGAAUUUGUG	4.89	5.39	0.907236	hsa-mir-10a
UCCCUGUCCUCCAGGAGCUCACG	4.89	5.39	0.907236	hsa-mir-339
UCACAUUGCCAGGGAUUACCA	2.44	2.7	0.903704	hsa-mir-23b
UUCACAGUGGCUAAGUUCCG	1193.19	1321.96	0.902592	hsa-mir-27a
UGUAAACAUCCCCGACUGGAAGCU	844.25	937.6	0.900437	hsa-mir-30d
AGCUACAUUGUCUGCUGGGUU	588.52	656.45	0.896519	hsa-mir-221
AAAGCUGGGUUGAGAGGGCGAA	133.41	148.55	0.898081	hsa-mir-320a
AAGCUGCCAGUUGAAGAACU	51.3	57.11	0.898267	hsa-mir-22
CGGGGUUUUGAGGGCGAGAUGA	31.38	34.81	0.901465	hsa-mir-193b
UAACAGUCUACAGCCAUGGUCG	20.86	23.29	0.895663	hsa-mir-132
UAAAGUGCUGACAGUGCAGA	19.73	21.82	0.904216	hsa-mir-106b
AAUGACACGAUCACUCCCGUUGAGU	6.2	6.86	0.90379	hsa-mir-425
CUGUGCGUGUGACAGCGGCU	4.13	4.66	0.886266	hsa-mir-210
GCUUAUCAGACUGAUGUUGA	4.13	4.66	0.886266	hsa-mir-21
ACUGUUUGCAGAGGAAACUGAG	2.63	2.94	0.894558	hsa-mir-452
UCCCUGUUCGGGCGCC	2.63	2.94	0.894558	hsa-mir-1274b
AGCUACAUUGUCUGCUGGGUUU	3737.79	4245.08	0.880499	hsa-mir-221
AGCUACAUUGUCUGCUGGGUUUCA	224.73	256.4	0.876482	hsa-mir-221
UUCACAGUGGCUAAGUU	73.28	83.59	0.87666	hsa-mir-27b,hsa-mir-27a
CUGACCUAUGAAUUGACAGC	52.24	59.32	0.880647	hsa-mir-192
CUGGCUCAGUUCAGCAGGAACAG	8.46	9.56	0.884937	hsa-mir-24-2,hsa-mir-24-1
ACUGUUUGCAGAGGAAACUGAGA	3.01	3.43	0.877551	hsa-mir-452
UGGGUUUACGUUGGGAGAACUU	3.01	3.43	0.877551	hsa-mir-629
ACAGACAUUAAUUGGGCGCCUG	2.82	3.19	0.884013	hsa-mir-421
UCACAGUGAACCGGUCUCUU	77.23	89.23	0.865516	hsa-mir-128-2,hsa-mir-128-1
AUCACAUUGCCAGGGAUUACC	19.73	22.8	0.865351	hsa-mir-23b
CAAAGUGCUGUUCGUGCAGGU	18.23	20.84	0.87476	hsa-mir-93
UCUCACACAGAAAUCGCACCCGU	18.23	20.84	0.87476	hsa-mir-342
UUUGGCAAUGGUAGAACUCACAC	14.09	16.18	0.870828	hsa-mir-182
UGUAAACAUCCUUGACUGGAAG	10.15	11.77	0.862362	hsa-mir-30e
UAAUACUGCCUGGUAAUGAUG	8.83	10.3	0.857282	hsa-mir-200b
AAAAGCUGGGUUGAGAGGGCAAA	6.76	7.84	0.862245	hsa-mir-320b-2,hsa-mir-320b-1
AAAUUAUUGUACAUCGGAUGA	5.45	6.37	0.855573	hsa-mir-944
UACCCAUUGCAUAUCGGAGUUGU	5.07	5.88	0.862245	hsa-mir-660
AAAAGCUGGGUUGAGAGGA	3.38	3.92	0.862245	hsa-mir-320d-1,hsa-mir-320d-2
GUAAACAUCCUCGACUGGAAGC	3.38	3.92	0.862245	hsa-mir-30a
UAAUACUGCCGGGUAAUGAUG	23.86	28.19	0.846399	hsa-mir-200c
UGCACCAUGGUUGUCUGAGCAU	9.77	11.52	0.84809	hsa-mir-767
AAGCUGGGUUGAGAGGGCG	8.08	9.56	0.845188	hsa-mir-320a
AGCUUAUCAGACUGAUGUUG	7.33	8.58	0.854312	hsa-mir-21
AGGAGGAAUUGGUGCUGGUCUUU	3.76	4.41	0.852608	hsa-mir-766
AGGGGCUGGCUUUCCUCUGGU	1.88	2.21	0.850679	hsa-mir-185
AGCUACAUUGUCUGCUGGGUUUC	2205.99	2627.25	0.839657	hsa-mir-221
UGACCUAUGAAUUGACAGCCAGU	102.03	121.34	0.84086	hsa-mir-192
AGGGACGGGACGCGGUGCAGUGUU	33.45	39.96	0.837087	hsa-mir-92b
UAAUACUGCCGGGUAAUGAU	10.71	12.75	0.84	hsa-mir-200c
UGUAAACAUCCUACACUCAGCU	10.33	12.26	0.842577	hsa-mir-30b
AACGGAAUCCCAAAAGCAGC	2.25	2.7	0.833333	hsa-mir-191
ACUGUGCGUGUGACAGCGGCUGA	2.25	2.7	0.833333	hsa-mir-210
CUACAUUGUCUGCUGGGUUU	2.25	2.7	0.833333	hsa-mir-221
GGUGCGGAGAGGGCCCACAGUG	2.07	2.45	0.844898	hsa-mir-675b
UACUAGACUGAAGCUCCUUGA	2.07	2.45	0.844898	hsa-mir-151
UAAUACUGCCUGGUAAUGAUGAC	348.19	419.41	0.83019	hsa-mir-200b
AUCACAUUGCCAGGGAUUUCC	155.58	188.5	0.825358	hsa-mir-23a
UUCACAGUGGCUAAGUUCUGC	127.21	153.94	0.826361	hsa-mir-27b
AAAAGCUGGGUUGAGAGGG	57.69	69.37	0.831628	hsa-mir-320c-1,hsa-mir-320c-2,hsa-mir-320b-2,hsa-mir-320b-1,hsa-mir-320a
CCGGGUCGGAGUUAGCUCAAGCGGU	19.92	24.02	0.829309	hsa-mir-886
UCGAGGAGCUCACAGUCUAG	4.7	5.64	0.833333	hsa-mir-151
CUGUGCGUGUGACAGCGGCUG	2.44	2.94	0.829932	hsa-mir-210
UGCAGCUGCCUGGGAGUGACUUCA	2.44	2.94	0.829932	hsa-mir-1301
CUAGCACCAUCUGAAAUCGGUU	70.65	86.04	0.82113	hsa-mir-29a
AUUGCACUUGUCCCGGCCUGU	31	37.75	0.821192	hsa-mir-92a-2,hsa-mir-92a-1
CUGGGAGAAGGCUGUUUACUCU	8.64	10.54	0.819734	hsa-mir-30c-2
UAGCAGCGGGAACAGUUCU	6.01	7.35	0.817687	hsa-mir-503
ACAUUCAUUGCUGUCGGUGGGUUU	3.01	3.68	0.817935	hsa-mir-181b-2
CAAGUAAUCCAGGAUAGGCU	3.01	3.68	0.817935	hsa-mir-26a-1,hsa-mir-26a-2
UAAAGUGCUGACAGUGCAG	3.01	3.68	0.817935	hsa-mir-106b
UGCGGGGCUAGGGCUAAC	2.82	3.43	0.822157	hsa-mir-744
AGCUUAUCAGACUGAUGUUGACU	49.98	61.53	0.812287	hsa-mir-21
UGAGAACUGAAUUCCAUAGGCUG	27.62	34.07	0.810684	hsa-mir-146b
AAGUAAUCCAGGAUAGGCU	13.72	16.91	0.811354	hsa-mir-26a-1,hsa-mir-26a-2
AAGCUGCCAGUUGAAGAA	7.7	9.56	0.805439	hsa-mir-22
UACUAGACUGAAGCUCCUUGAG	6.39	7.84	0.815051	hsa-mir-151
ACAGUAGUCUGCACAUUGGUU	3.76	4.66	0.806867	hsa-mir-199a-1,hsa-mir-199b,hsa-mir-199a-2
AAAGCUGGGUUGAGAGGGCGA	213.46	266.21	0.801848	hsa-mir-320a
CGGGUCGGAGUUAGCUCAAGCGGUU	160.85	201.74	0.797313	hsa-mir-886
AACGGAAUCCCAAAAGCAGCUG	155.02	193.16	0.802547	hsa-mir-191
AAAGCUGGGUUGAGAGGGCG	73.85	92.17	0.801237	hsa-mir-320a
AUCGGGAAUGUCGUGUCCGCC	9.96	12.5	0.7968	hsa-mir-425
AUAUAAUACAACCUGCUAAGU	8.64	10.79	0.800741	hsa-mir-374b
CUUAUCAGAUUGUAUUGUAAU	4.13	5.15	0.801942	hsa-mir-374a
CGGGUCGGAGUUAGCUCAAGCGGUUA	15.97	20.1	0.794527	hsa-mir-886
UAUUGCACUCGUCCCGG	7.7	9.81	0.784913	hsa-mir-92b
AUCACAUUGCCAGGGAU	6.58	8.33	0.789916	hsa-mir-23a,hsa-mir-23b
GCUGACUCCUAGUCCAGGGCU	6.2	7.84	0.790816	hsa-mir-345
CACCCGGCUGUGUGCACAUGUG	6.01	7.6	0.790789	hsa-mir-941-2,hsa-mir-941-3,hsa-mir-941-4,hsa-mir-941-1
UAGGUAGUUUCAUGUUGUUGGG	332.4	425.29	0.781584	hsa-mir-196a-2,hsa-mir-196a-1
UUCAAGUAAUUCAGGAUAGGU	52.8	68.39	0.772043	hsa-mir-26b
UGUAAACAUCCUACACUCUCAGC	10.71	13.97	0.766643	hsa-mir-30c-2,hsa-mir-30c-1
UGAAUUACCGAAGGGCCAUA	6.58	8.58	0.7669	hsa-mir-183
UCAAGAGCAAUAACGAAAAAUGU	5.64	7.35	0.767347	hsa-mir-335
CUAAUACUGCCGGGUAAUGAUGG	4.7	6.13	0.766721	hsa-mir-200c
AAAAACUGAGACUACUUUUGCA	4.51	5.88	0.767007	hsa-mir-548e
CUCGAGGAGCUCACAGUCUAGUA	3.95	5.15	0.76699	hsa-mir-151
UAAGGUGCAUCUAGUGCAGAUAG	3.76	4.9	0.767347	hsa-mir-18a
GUAAACAUCCUUGACUGGAAGCU	3.38	4.41	0.76644	hsa-mir-30e
UGCGGGGCUAGGGCUAA	2.82	3.68	0.766304	hsa-mir-744
UUCAACGGGUAUUUAUUGAGC	2.82	3.68	0.766304	hsa-mir-95
ACUGCAGUGAAGGCACUUGU	2.63	3.43	0.766764	hsa-mir-17
AUUGCACUCGUCCCGGCCUCC	2.44	3.19	0.76489	hsa-mir-92b
UAGACUGAAGCUCCUUGAGGA	2.25	2.94	0.765306	hsa-mir-151
UGUAAACAUCCUUGACU	2.25	2.94	0.765306	hsa-mir-30e
UGGGAACGGGUUCCGGCAGACGCUG	2.07	2.7	0.766667	hsa-mir-1292
AUAAUACAACCUGCUAAGUG	1.88	2.45	0.767347	hsa-mir-374b
AUCACAUUGCCAGGGAUUAC	19.54	25.74	0.75913	hsa-mir-23b
AAAAGCUGGGUUGAGAGG	17.85	23.53	0.758606	hsa-mir-320c-1,hsa-mir-320c-2,hsa-mir-320d-1,hsa-mir-320d-2,hsa-mir-320b-2,hsa-mir-320b-1,hsa-mir-320a
UUCAAGUAAUCCAGGAUAGGCU	1414.17	1882.81	0.751095	hsa-mir-26a-1,hsa-mir-26a-2
CAAAGUGCUGUUCGUGCAGGUAG	641.5	849.85	0.754839	hsa-mir-93
UAAUACUGCCGGGUAAUGAUGGA	1668.21	2246.33	0.742638	hsa-mir-200c
CAAAGUGCUGUUCGUGCAGGUAGU	38.71	52.46	0.737896	hsa-mir-93
UGUAAACAUCCUUGACUGGAAGC	25.74	34.56	0.744792	hsa-mir-30e
AAGCUGCCAGUUGAAGAAC	5.26	7.11	0.739803	hsa-mir-22
UAACACUGUCUGGUAAAGAUG	5.07	6.86	0.739067	hsa-mir-141
GCUUAUCAGACUGAUGUUGAC	7.14	9.81	0.727829	hsa-mir-21
GUGCCUACUGAGCUGAAACACAG	7.14	9.81	0.727829	hsa-mir-24-2
AGGGACUUUUGGGGGCAGAUGUGU	4.13	5.64	0.73227	hsa-mir-365-1
AGCUUAUCAGACUGAUGUUGAC	207.82	287.29	0.723381	hsa-mir-21
UGUAAACAUCCUCGACUGGAA	29.69	41.43	0.71663	hsa-mir-30a
AAAGCUGGGUUGAGAGGG	6.01	8.33	0.721489	hsa-mir-320c-1,hsa-mir-320c-2,hsa-mir-320b-2,hsa-mir-320b-1,hsa-mir-320a
GAGGCAGAAGCAGGAUGACA	3.19	4.41	0.723356	hsa-mir-1910
AGAGCUUAGCUGAUUGGUGAACAGU	2.82	3.92	0.719388	hsa-mir-27b
CAGUGCAAUGUUAAAAG	2.82	3.92	0.719388	hsa-mir-130a
CCUCAGGGCUGUAGAACAGGGCU	2.63	3.68	0.714674	hsa-mir-1266
UUCAACGGGUAUUUAUUGA	2.63	3.68	0.714674	hsa-mir-95
AUCACAUUGCCAGGGAUUU	228.12	320.13	0.712586	hsa-mir-23a
UUCACAGUGGCUAAGUUCCGC	125.9	178.45	0.70552	hsa-mir-27a
UAGGUAGUUUCCUGUUGUUGGG	66.52	94.13	0.706682	hsa-mir-196b
UUAUCAGACUGAUGUUGACU	7.33	10.3	0.71165	hsa-mir-21
UCCCUGUCCUCCAGGAGCUCA	6.76	9.56	0.707113	hsa-mir-339
UAAUACUGCCGGGUAAUGAUGGAG	4.32	6.13	0.704731	hsa-mir-200c
UAGCUUAUCAGACUGAUGUUG	1472.79	2097.78	0.702071	hsa-mir-21
AAAUUAUUGUACAUCGGAUGAG	72.34	103.93	0.696045	hsa-mir-944
UUAUAAAGCAAUGAGACUGAU	28	40.2	0.696517	hsa-mir-340
AGCUUAUCAGACUGAUGUUGA	27.81	39.47	0.704586	hsa-mir-21
AAUACUGCCGGGUAAUGAUGGA	3.76	5.39	0.697588	hsa-mir-200c
ACUGCCCCAGGUGCUGCUGG	2.07	2.94	0.704082	hsa-mir-324
AGCAUUGUACAGGGCUAUG	2.07	2.94	0.704082	hsa-mir-103-2,hsa-mir-103-1
CACCCGUAGAACCGACCU	2.07	2.94	0.704082	hsa-mir-99b
UCUCACACAGAAAUCGCACCCG	2.07	2.94	0.704082	hsa-mir-342
UGUGCAAAUCCAUGCAAAACU	2.07	2.94	0.704082	hsa-mir-19b-2,hsa-mir-19b-1
AAUCACAUUGCCAGGGAUUUC	1.88	2.7	0.696296	hsa-mir-23a
ACUGAUUUCUUUUGGUGUUCAGA	1.88	2.7	0.696296	hsa-mir-29a
UAGUACUGUGCAUAUCAUCUA	1.88	2.7	0.696296	hsa-mir-1278
UACCACAGGGUAGAACCACGGAC	544.55	786.85	0.692063	hsa-mir-140
UAAUACUGCCGGGUAAUGAUGG	328.08	476.03	0.6892	hsa-mir-200c
AUCACAUUGCCAGGGAUUUC	264.76	381.9	0.69327	hsa-mir-23a
UGACCUAUGAAUUGACAGCCAG	96.77	139.72	0.692599	hsa-mir-192
UAGCUUAUCAGACUGAUGU	77.04	112.02	0.687734	hsa-mir-21
CUAGCACCAUCUGAAAUCGGUUAU	3.57	5.15	0.693204	hsa-mir-29a
CGGCUCUGGGUCUGUGGGGAG	3.38	4.9	0.689796	hsa-mir-760
UACCGCACUGUGGGUACUUGCU	3.19	4.66	0.684549	hsa-mir-106b
CAUCGGGAAUGUCGUGUCCGC	1.69	2.45	0.689796	hsa-mir-425
CCUCCCACACCCAAGGCUUGCA	1.69	2.45	0.689796	hsa-mir-532
UCCUGUACUGAGCUGCCCCGA	1.69	2.45	0.689796	hsa-mir-486
UGUAAACAUCCCCGACUGGAAGCUG	1.69	2.45	0.689796	hsa-mir-30d
UUAAGACUUGCAGUGAUGUUU	1.69	2.45	0.689796	hsa-mir-499
AAAAGCUGGGUUGAGAGGGCGAA	896.11	1325.88	0.675861	hsa-mir-320a
UUCACAGUGGCUAAGUUC	78.92	116.68	0.67638	hsa-mir-27b,hsa-mir-27a
UUAUAAUACAACCUGAUAAGUG	52.43	77.21	0.679057	hsa-mir-374a
AUUGCACUUGUCUCGGUCUGA	5.83	8.58	0.679487	hsa-mir-25
AAGCUGCCAGUUGAAGAACUG	5.07	7.6	0.667105	hsa-mir-22
ACUCGGCGUGGCGUCGGUCGUGGUA	4.13	6.13	0.673736	hsa-mir-1307
UUCAACGGGUAUUUAUUGAGCA	62.38	94.62	0.659269	hsa-mir-95
GUAGCUUAUCAGACUGAUGUUGA	52.43	79.91	0.656113	hsa-mir-21
UCACAGUGAACCGGUCUCU	15.03	22.8	0.659211	hsa-mir-128-2,hsa-mir-128-1
CGGUUUGAGGCUACAGUGAGAU	14.28	21.57	0.662031	hsa-mir-1304
UAAUACUGCCGGGUAAUGA	9.4	14.22	0.661041	hsa-mir-200c
AAGGAGCUCACAGUCUAUUGAG	8.27	12.5	0.6616	hsa-mir-28
UGGAGUGUGACAAUGGUGUUU	6.76	10.3	0.656311	hsa-mir-122
UUCAAGUAAUUCAGGAUAGGUUG	6.76	10.3	0.656311	hsa-mir-26b
ACAGUCUACAGCCAUGGUCG	2.25	3.43	0.655977	hsa-mir-132
AGUGCAAUGAUGAAAGGGCAU	2.25	3.43	0.655977	hsa-mir-130b
UGGACUUGGAGUCAGAAGGC	2.25	3.43	0.655977	hsa-mir-378
AAAAGCUGGGUUGAGAGGGC	39.84	61.04	0.652687	hsa-mir-320a,hsa-mir-320b-2,hsa-mir-320b-1
GCUGACUCCUAGUCCAGGGCUC	17.29	26.72	0.647081	hsa-mir-345
AACCCGUAGAUCCGAUCUUGU	14.84	22.8	0.650877	hsa-mir-99a
CGAAUCAUUAUUUGCUGCUCUA	6.2	9.56	0.648536	hsa-mir-15b
UGAAUUACCGAAGGGCCAU	5.45	8.33	0.654262	hsa-mir-183
GUGCCUACUGAGCUGAAACACA	2.07	3.19	0.648903	hsa-mir-24-2
UGAGCGCCUCGACGACAGAGCC	30.25	47.06	0.642796	hsa-mir-339
UUAUCAGACUGAUGUUGAC	10.71	16.67	0.642472	hsa-mir-21
UAUCAGACUGAUGUUGACU	8.46	13.24	0.638973	hsa-mir-21
CAAAGAAUUCUCCUUUUGGGCUUU	4.89	7.6	0.643421	hsa-mir-186
UCUGGAGAUUUGUGCAGCUUGU	1.88	2.94	0.639456	hsa-mir-1293
UGUAACAGCAACUCCAUGUGGA	1.88	2.94	0.639456	hsa-mir-194-1,hsa-mir-194-2
AUCACAUUGCCAGGGAUUA	27.62	44.12	0.62602	hsa-mir-23b
UUAUCAGACUGAUGUUGA	7.14	11.28	0.632979	hsa-mir-21
UAGGUAGUUUCAUGUUGUUGGGAU	2.63	4.17	0.630695	hsa-mir-196a-2
ACAGGUGAGGUUCUUGGGAG	1.69	2.7	0.625926	hsa-mir-125a
ACCACUGACCGUUGACUGUACC	1.69	2.7	0.625926	hsa-mir-181a-2
GAAAAGCUGGGUUGAGAGGGCGAA	1.69	2.7	0.625926	hsa-mir-320a
UCAAGUAAUCCAGGAUAGGCU	5.64	9.07	0.62183	hsa-mir-26a-1,hsa-mir-26a-2
UUCACAGUGGCUAAGUUCU	101.66	167.91	0.605443	hsa-mir-27b
UGGCUCAGUUCAGCAGGAAC	42.65	70.35	0.606254	hsa-mir-24-2,hsa-mir-24-1
AACGGAAUCCCAAAAGCAGCU	12.03	19.86	0.60574	hsa-mir-191
UACCCAUUGCAUAUCGGAGUUG	7.14	11.77	0.606627	hsa-mir-660
UGGCUCAGUUCAGCAGG	6.76	11.03	0.612874	hsa-mir-24-1,hsa-mir-24-2
GCUCUGACUUUAUUGCACUAC	3.76	6.13	0.613377	hsa-mir-301a
AUGACACGAUCACUCCCGUUGAGU	2.25	3.68	0.611413	hsa-mir-425
GCAAGAUGCUGGCAUAGCUGU	1.5	2.45	0.612245	hsa-mir-31
UAGGUAGUUUCAUGUUGUUGG	27.43	45.35	0.604851	hsa-mir-196a-2,hsa-mir-196a-1
UAAAGUGCUUAUAGUGCAGGUAGU	12.78	21.33	0.599156	hsa-mir-20a
AAAAGCUGGGUUGAGAGGGCG	541.35	918.24	0.589552	hsa-mir-320a
UACCACAGGGUAGAACCACGG	62.76	105.65	0.594037	hsa-mir-140
GCUCUGACUUUAUUGCACUACU	6.76	11.52	0.586806	hsa-mir-301a
UGUAAACAUCCUUGACUGGAAGCUG	2.44	4.17	0.585132	hsa-mir-30e
AAAGAAUUCUCCUUUUGGGCUU	1.88	3.19	0.589342	hsa-mir-186
AAUCACAUUGCCAGGGAUUU	1.88	3.19	0.589342	hsa-mir-23a
AGCUUAUCAGACUGAUGUU	1.88	3.19	0.589342	hsa-mir-21
CAAAGUGCUUACAGUGCA	1.88	3.19	0.589342	hsa-mir-17
UACCACAGGGUAGAACCAC	1.88	3.19	0.589342	hsa-mir-140
UGGCUCAGUUCAGCAGGAACAG	5871.62	10040.6	0.58479	hsa-mir-24-1,hsa-mir-24-2
UACCACAGGGUAGAACCACGGA	666.5	1149.15	0.579994	hsa-mir-140
UGUAAACAUCCCCGACUGGAAGC	230.75	399.31	0.577872	hsa-mir-30d
UGUAAACAUCCCCGACUGGAAG	76.85	133.1	0.577385	hsa-mir-30d
CAUUGCACUUGUCUCGGUCU	56.18	97.31	0.57733	hsa-mir-25
UAAUACUGCCUGGUAAUGAUGA	52.43	90.7	0.57806	hsa-mir-200b
CGGGGUUUUGAGGGCGAGAUG	8.46	14.46	0.585062	hsa-mir-193b
AAUGCACCUGGGCAAGGAUUCA	3.01	5.15	0.584466	hsa-mir-502
UAGCUUAUCAGACUGAUGUUGAC	14296.9	24922.1	0.573661	hsa-mir-21
AAAAGCUGGGUUGAGAGGGCGA	2144.17	3758.99	0.570411	hsa-mir-320a
CAAAGUGCUUACAGUGCAGGUAG	216.28	376.76	0.574052	hsa-mir-17
AAAAGCUGGGUUGAGAGGGCAA	27.62	48.53	0.569132	hsa-mir-320b-2,hsa-mir-320b-1
UGACCUAUGAAUUGACAGCC	19.92	34.81	0.572249	hsa-mir-192
UCCCUGAGACCCUUUAACCUGUG	10.71	18.87	0.567568	hsa-mir-125a
UGGGUCUUUGCGGGCGAGAUGA	10.33	18.14	0.56946	hsa-mir-193a
UAGGUAGUUUCCUGUUGUUGG	10.15	17.65	0.575071	hsa-mir-196b
ACUCGGCGUGGCGUCGGUCGUGGU	9.58	16.91	0.566529	hsa-mir-1307
CAAAGAAUUCUCCUUUUGGGC	5.07	8.82	0.57483	hsa-mir-186
CCGGGUCGGAGUUAGCUCAAGCGGUU	5.07	8.82	0.57483	hsa-mir-886
UAGCUUAUCAGACUGAUGUUGACUGUU	4.51	7.84	0.575255	hsa-mir-21
UAACACUGUCUGGUAACGAUG	3.95	6.86	0.575802	hsa-mir-200a
UGAGUGUGUGUGUGUGAGUGUGUGU	2.25	3.92	0.57398	hsa-mir-574
ACAUUGCCAGGGAUUUC	1.69	2.94	0.57483	hsa-mir-23a
UAACACUGUCUGGUAACGAUGU	18.41	33.09	0.556361	hsa-mir-200a
UAUCAGACUGAUGUUGAC	9.58	17.16	0.558275	hsa-mir-21
AGAGGUAGUAGGUUGC	5.26	9.31	0.564984	hsa-let-7d
CAUUAUUACUUUUGGUACGCG	4.51	8.09	0.557478	hsa-mir-126
UCCCUGAGACCCUUUAACCUGUGA	3.95	7.11	0.555556	hsa-mir-125a
AUUGCACUUGUCCCGGCCUG	2.07	3.68	0.5625	hsa-mir-92a-1,hsa-mir-92a-2
UCACAGUGAACCGGUC	1.5	2.7	0.555556	hsa-mir-128-1,hsa-mir-128-2
UGUAAACAUCCUACACU	1.5	2.7	0.555556	hsa-mir-30c-2,hsa-mir-30b,hsa-mir-30c-1
UAGCUUAUCAGACUGAUGUUGA	6522.52	11789.3	0.553258	hsa-mir-21
UACCACAGGGUAGAACCACGGACA	174.19	317.68	0.548319	hsa-mir-140
UAGCUUAUCAGACUGAUG	75.91	137.02	0.554007	hsa-mir-21
UAGGUAGUUUCAUGUUGUUGGGA	58.44	105.65	0.553147	hsa-mir-196a-2
UUCAAGUAAUCCAGGAUAGGC	44.72	80.89	0.55285	hsa-mir-26a-1,hsa-mir-26a-2
UUCAAGUAAUCCAGGAUAGG	20.29	37.01	0.54823	hsa-mir-26a-2,hsa-mir-26a-1
AAUUAUUGUACAUCGGAUGAG	13.72	25	0.5488	hsa-mir-944
ACUCGGCGUGGCGUCGGUCGU	21.8	40.45	0.538937	hsa-mir-1307
UCAAGAGCAAUAACGAAAAAUG	11.09	20.35	0.544963	hsa-mir-335
AGCUACAUUGUCUGCUG	6.95	12.99	0.535027	hsa-mir-221
AAAGCUGGGUUGAGAGGGC	3.19	5.88	0.542517	hsa-mir-320b-2,hsa-mir-320b-1,hsa-mir-320a
ACAGUGGCUAAGUUCU	1.32	2.45	0.538776	hsa-mir-27b
CUAAUACUGCCGGGUAAUGAUG	1.32	2.45	0.538776	hsa-mir-200c
UCAGACUGAUGUUGACU	1.32	2.45	0.538776	hsa-mir-21
UAGCUUAUCAGACUGAUGUU	387.65	730.23	0.53086	hsa-mir-21
CAAAGUGCUUACAGUGCAGGUAGU	24.24	45.84	0.528796	hsa-mir-17
AAAAGCUGGGUUGAGAGGGCA	21.8	41.43	0.526189	hsa-mir-320b-2,hsa-mir-320b-1
UGAAUUACCGAAGGGCCAUAA	6.39	12.01	0.532057	hsa-mir-183
UGAGAACUGAAUUCCAUAGGCU	3.38	6.37	0.530612	hsa-mir-146b
CUGGGUGGUCUGGAGAUUUGUG	1.69	3.19	0.529781	hsa-mir-1293
UAAAGUGCUUAUAGUGCAGGUAG	98.65	189.97	0.519293	hsa-mir-20a
CUUAUCAGAUUGUAUUGUAAUU	11.27	21.82	0.516499	hsa-mir-374a
UGUAAACAUCCUCGACUGG	7.89	15.2	0.519079	hsa-mir-30a
UUCAAGUAAUCCAGGAUAG	7.14	13.73	0.520029	hsa-mir-26a-1,hsa-mir-26a-2
CUAGCACCAUCUGAAAUCGGU	2.82	5.39	0.523191	hsa-mir-29a
GGGAGCCAGGAAGUAUUGAUGUU	2.82	5.39	0.523191	hsa-mir-505
UGAGGUAGUAGAUUGU	23.3	45.84	0.50829	hsa-let-7f-1,hsa-let-7f-2
UAGCUUAUCAGACUGA	3.76	7.35	0.511565	hsa-mir-21
AUCAGACUGAUGUUGACU	3.38	6.62	0.510574	hsa-mir-21
AACCCGUAGAUCCGAACUUG	1.88	3.68	0.51087	hsa-mir-100
AAAAGUAUUUGCGGGUUUUGUC	3.19	6.37	0.500785	hsa-mir-548l
AAAGCUGGGUUGAGAGGGCAA	3.19	6.37	0.500785	hsa-mir-320b-2,hsa-mir-320b-1
CUGGGAGAAGGCUGUUUACUC	2.82	5.64	0.5	hsa-mir-30c-2
AACCCGUAGAUCCGAAC	2.07	4.17	0.496403	hsa-mir-100
UGGCUCAGUUCAGCAGGA	15.41	31.62	0.48735	hsa-mir-24-1,hsa-mir-24-2
AAAAGCUGGGUUGAGAGGGU	13.53	27.45	0.492896	hsa-mir-320c-1,hsa-mir-320c-2
UGGCUCAGUUCAGCAGGAACAGG	5.64	11.52	0.489583	hsa-mir-24-1,hsa-mir-24-2
ACUCGGCGUGGCGUCGGUCG	5.07	10.3	0.492233	hsa-mir-1307
CGUACCGUGAGUAAUAAUGCG	5.07	10.3	0.492233	hsa-mir-126
AGGGACUUUUGGGGGCAGAUGU	3.01	6.13	0.491028	hsa-mir-365-1
CUGACCUAUGAAUUGACA	1.69	3.43	0.492711	hsa-mir-192
UCAAAGUGCUUACAGUGCAGGUAG	1.69	3.43	0.492711	hsa-mir-17
UUUUUCAUUAUUGCUCCUGAC	1.69	3.43	0.492711	hsa-mir-335
UAGGUAGUUUCCUGUUGUUGGGAU	1.32	2.7	0.488889	hsa-mir-196b
UUCUCUGUUUUGGCCAUGUGUG	1.32	2.7	0.488889	hsa-mir-942
UUAUAAUACAACCUGAUAAGU	14.66	30.4	0.482237	hsa-mir-374a
GUAGCUUAUCAGACUGAUGUUGAC	15.97	34.32	0.465326	hsa-mir-21
UUCACAGUGGCUAAGU	2.07	4.41	0.469388	hsa-mir-27a,hsa-mir-27b
AAAAGUAUUUGCGGGUUUUGU	1.5	3.19	0.470219	hsa-mir-548l
UGUAACAGCAACUCCAUGUGGAA	11.27	24.51	0.459812	hsa-mir-194-2
CUUUCAGUCGGAUGUUUGC	2.25	4.9	0.459184	hsa-mir-30a
AGCGCCUCGACGACAGAGCCGG	1.13	2.45	0.461224	hsa-mir-339
UGGCUCAGUUCAGCAGGAACA	419.97	929.51	0.451819	hsa-mir-24-1,hsa-mir-24-2
UAUCAGACUGAUGUUGA	5.07	11.28	0.449468	hsa-mir-21
CUAAUACUGCCGGGUAAUGAUGGA	3.01	6.62	0.454683	hsa-mir-200c
CGGGGUUUUGAGGGCGAGAU	1.88	4.17	0.450839	hsa-mir-193b
GCUACAUUGUCUGCUGGGUUU	1.88	4.17	0.450839	hsa-mir-221
AAUGGAUUUUUGGAGCAGG	1.32	2.94	0.44898	hsa-mir-1246
UGAGUGUGUGUGUGUGAGUGUGU	1.32	2.94	0.44898	hsa-mir-574
CAAAGAAUUCUCCUUUUGGGCUU	34.57	79.42	0.435281	hsa-mir-186
GAAAAGCUGGGUUGAGAGGGCGA	27.81	63	0.441429	hsa-mir-320a
AAAAGCUGGGUUGAGAG	9.96	22.8	0.436842	hsa-mir-320c-1,hsa-mir-320c-2,hsa-mir-320d-1,hsa-mir-320d-2,hsa-mir-320b-2,hsa-mir-320b-1,hsa-mir-320a
GAAAAGCUGGGUUGAGAGGGCG	8.83	20.1	0.439303	hsa-mir-320a
GUAGAGGAGAUGGCGCAGGGGACA	3.01	6.86	0.438776	hsa-mir-877
AUUGAUCAUCGACACUUCG	1.5	3.43	0.437318	hsa-mir-1826
UGUAAACAUCCUCGACUGGA	10.33	24.27	0.425628	hsa-mir-30a
GUAGCUUAUCAGACUGAUGUUG	6.2	14.46	0.428769	hsa-mir-21
UAAUACUGUCUGGUAAAACCG	3.19	7.35	0.434014	hsa-mir-429
UGACCUAUGAAUUGACAGC	3.19	7.35	0.434014	hsa-mir-192
AGCGCCUCGACGACAGAGCCG	13.15	31.62	0.415876	hsa-mir-339
CAUCUUACUGGGCAGCAUUGG	6.76	16.18	0.4178	hsa-mir-200b
UAGGUAGUUUCCUGUUGUUGGGA	6.76	16.18	0.4178	hsa-mir-196b
CAAAGUGCUGUUCGUGCAG	3.57	8.58	0.416084	hsa-mir-93
GCUCAGUUCAGCAGGAACAG	3.38	8.09	0.4178	hsa-mir-24-2,hsa-mir-24-1
AUGGUAGAACUCACACU	2.44	5.88	0.414966	hsa-mir-182
UAAUACUGCCUGGUAAUGAU	2.44	5.88	0.414966	hsa-mir-200b
UAGCUUAUCAGACUGAU	12.03	29.42	0.408906	hsa-mir-21
CAUCUUACUGGGCAGCAUUGGAU	2.63	6.37	0.412873	hsa-mir-200b
AAUCACAUUGCCAGGGAUUUCC	1.69	4.17	0.405276	hsa-mir-23a
GAGCGCCUCGACGACAGAGCCG	1.69	4.17	0.405276	hsa-mir-339
UAGUACCAGUACCUUGUGUUCA	1.32	3.19	0.413793	hsa-mir-624
UUUAGGAUAAGCUUGACUUUUG	1.32	3.19	0.413793	hsa-mir-651
ACUCGGCGUGGCGUCGGUCGUG	82.3	204.68	0.402091	hsa-mir-1307
GCAUGGGUGGUUCAGUG	3.19	8.09	0.394314	hsa-mir-1308
CAAAGAAUUCUCCUUUUGGGCU	17.48	44.86	0.389657	hsa-mir-186
ACCAAUAUUACUGUGCUGCUU	1.13	2.94	0.384354	hsa-mir-16-2
GGUGGUCUGGAGAUUUGUGCA	0.94	2.45	0.383673	hsa-mir-1293
UGAGUGUGUGUGUGUGAGUGUGUG	0.94	2.45	0.383673	hsa-mir-574
UUAUAAAGCAAUGAGACUG	0.94	2.45	0.383673	hsa-mir-340
CUUAGCAGGUUGUAUUAUCAUU	2.44	6.37	0.383046	hsa-mir-374b
GGGGGUCCCCGGUGCUCGGAU	1.5	3.92	0.382653	hsa-mir-615
CUGGGAGGUGGAUGUUUACUU	3.57	9.56	0.373431	hsa-mir-30b
ACAUUCAUUGCUGUCGGUGGGUU	2.82	7.6	0.371053	hsa-mir-181b-1,hsa-mir-181b-2
CUCGGCGUGGCGUCGGUCGU	2.44	6.62	0.36858	hsa-mir-1307
AUCUUACUGGGCAGCAUUGGA	1.5	4.17	0.359712	hsa-mir-200b
CAUCUUACUGGGCAGCAUUG	1.5	4.17	0.359712	hsa-mir-200b
AAAAGCUGGGUUGAGAGGGUA	1.32	3.68	0.358696	hsa-mir-320c-1
AUGUAGGGCUAAAAGCCAUGGG	1.13	3.19	0.354232	hsa-mir-135b
UGUAAACAUCCCCGACUGGA	4.89	13.97	0.350036	hsa-mir-30d
CUCGGCGUGGCGUCGGUCGUGGU	6.95	19.86	0.34995	hsa-mir-1307
AAAAGUAAUCGCGGUUUUUGU	0.94	2.7	0.348148	hsa-mir-548h-2,hsa-mir-548h-1,hsa-mir-548h-3,hsa-mir-548h-4
ACUCGGCGUGGCGUCGGUCGUGG	34.2	99.77	0.342788	hsa-mir-1307
UGUAAACAUCCCCGACUGGAA	9.58	28.19	0.339837	hsa-mir-30d
GAAAUUAUUGUACAUCGGAUGA	2.07	6.13	0.337684	hsa-mir-944
GGGUCGGAGUUAGCUCAAGCGGUUAC	2.07	6.13	0.337684	hsa-mir-886
AAUACUGCCUGGUAAUGAUGAC	11.46	34.07	0.336366	hsa-mir-200b
CAACAAAUCACAGUCUGCCAUA	1.88	5.64	0.333333	hsa-mir-7-1
GCAUGGGUGGUUCAGU	1.13	3.43	0.329446	hsa-mir-1308
UAGCUUAUCAGACUGAUGUUGACUGUUG	0.94	2.94	0.319728	hsa-mir-21
UCUUCUCUGUUUUGGCCAUGUG	0.94	2.94	0.319728	hsa-mir-942
UGUAAACAUCCUACACUCUCA	1.5	4.9	0.306122	hsa-mir-30c-1,hsa-mir-30c-2
GUAGAGGAGAUGGCGCAGGGGA	0.75	2.45	0.306122	hsa-mir-877
CAUCUUACUGGGCAGCAUUGGA	10.71	36.28	0.295204	hsa-mir-200b
CUGGGAGGUGGAUGUUUACUUC	0.94	3.19	0.294671	hsa-mir-30b
UGAGUGUGUGUGUGUGAGUGU	0.94	3.19	0.294671	hsa-mir-574
GAGGCAGAAGCAGGAUGACAA	0.75	2.7	0.277778	hsa-mir-1910
CUCGGCGUGGCGUCGGUCGUGG	10.33	37.26	0.277241	hsa-mir-1307
AAAGCUGGGUUGAGAGGGU	1.13	4.17	0.270983	hsa-mir-320c-2,hsa-mir-320c-1
ACUGGACUUGGAGUCAG	1.13	4.17	0.270983	hsa-mir-378
GUGCCUACUGAGCUGAAACACAGU	2.44	9.31	0.262084	hsa-mir-24-2
ACCAAUAUUACUGUGCUGCUUU	6.2	24.02	0.258118	hsa-mir-16-2
ACCACUGACCGUUGACUGUAC	0.75	2.94	0.255102	hsa-mir-181a-2
CUCGGCGUGGCGUCGGUCGUG	8.27	32.85	0.25175	hsa-mir-1307
UUGCAGCUGCCUGGGAGUGACU	1.69	6.86	0.246356	hsa-mir-1301
GAAAUUAUUGUACAUCGGAUGAG	8.08	35.3	0.228895	hsa-mir-944
ACCAAUAUUACUGUGCUGCUUUA	3.19	13.97	0.228346	hsa-mir-16-2
GUAGAGGAGAUGGCGCAGGGGAC	1.32	5.88	0.22449	hsa-mir-877
CAUCGGGAAUGUCGUGUCCGCC	2.63	11.77	0.223449	hsa-mir-425
CAACACCAGUCGAUGGGCUGUC	11.65	52.7	0.221063	hsa-mir-21
ACCCGGGUCGGAGUUAGCUCAAGCGGU	1.88	9.56	0.196653	hsa-mir-886
CUAUACGACCUGCUGCCUUUCU	2.07	10.54	0.196395	hsa-let-7d
ACCCGGGUCGGAGUUAGCUCAAGCGG	1.32	6.86	0.19242	hsa-mir-886
GGUCGGAGUUAGCUCAAGCGGU	0.56	2.94	0.190476	hsa-mir-886
AGAGCUUAGCUGAUUGGUGAA	1.13	6.37	0.177394	hsa-mir-27b
AAAAACUGAGACUACUUUUGC	0.56	3.19	0.175549	hsa-mir-548e
GGGUUCCUGGCAUGCUGAUUUG	0.56	3.19	0.175549	hsa-mir-23b
UCCCUGUUCGGGCGCCA	14.84	85.06	0.174465	hsa-mir-1274b
AGCGGAGGAAAAGAAACU	0.56	3.43	0.163265	hsa-mir-923
CAAAACGUGAGGCGCUGCUAU	7.7	48.04	0.160283	hsa-mir-424
AGGGACUUUCAGGGGCAGCUGUG	0.38	2.45	0.155102	hsa-mir-365-2
UAUACGACCUGCUGCCUUUCU	0.38	2.45	0.155102	hsa-let-7d
CCAAUAUUACUGUGCUGCUUUA	1.69	11.03	0.153218	hsa-mir-16-2
ACUCUUUCCCUGUUGCACUACU	0.56	3.68	0.152174	hsa-mir-130b
CAAAUUCGUAUCUAGGGGAAU	0.56	3.68	0.152174	hsa-mir-10a
UCAGCGGAGGAAAAGAAACUAACCAGGA	0.56	3.68	0.152174	hsa-mir-923
CAAAACGUGAGGCGCUGCUAUA	4.13	28.68	0.144003	hsa-mir-424
AGACACAUUUGGAGAGGGAAC	0.56	3.92	0.142857	hsa-mir-642
GGGUUCCUGGCAUGCUGAUUU	13.15	92.9	0.14155	hsa-mir-23b
AGGAGGAAUUGGUGCUGGUCUUUCA	0.38	2.7	0.140741	hsa-mir-766
CUAUACGACCUGCUGCCUUUC	0.38	2.7	0.140741	hsa-let-7d
AGGCGGAGACUUGGGCAAUUGCU	25.55	204.92	0.124683	hsa-mir-25
ACUCGGCGUGGCGUCGG	0.38	3.19	0.119122	hsa-mir-1307
AGGCGGAGACUUGGGCAAUUGC	5.83	49.27	0.118328	hsa-mir-25
AGGGCUUAGCUGCUUGUGAGCA	2.07	18.38	0.112622	hsa-mir-27a
AGGCGGAGACUUGGGCAAUU	0.94	8.82	0.106576	hsa-mir-25
GCAUGGGUGGUUCAGUGG	5.26	49.52	0.10622	hsa-mir-1308
GGGGUUCCUGGGGAUGGGAUU	0.56	5.39	0.103896	hsa-mir-23a
AGGGACUUUUGGGGGCAGAUGUG	1.69	16.91	0.0999409	hsa-mir-365-1
CCCUGUUCGGGCGCCA	3.38	34.56	0.0978009	hsa-mir-1274b
GCGGAGGAAAAGAAACUAACCAGGA	0.38	3.92	0.0969388	hsa-mir-923
AGGCGGAGACUUGGGCAAUUG	4.32	45.1	0.0957871	hsa-mir-25
GGGUCGGAGUUAGCUCAAGCGGU	99.03	1130.03	0.0876348	hsa-mir-886
AGGUUGGGAUCGGUUGCAAUGC	2.63	30.15	0.0872305	hsa-mir-92a-1
GGGUCGGAGUUAGCUCAAGCGGUUA	8.64	100.01	0.0863914	hsa-mir-886
GGGGUUCCUGGGGAUGGGAUUU	1.88	23.04	0.0815972	hsa-mir-23a
AGAGCUUAGCUGAUUGGUGAACA	9.77	120.85	0.080844	hsa-mir-27b
GGGUCGGAGUUAGCUCAAGCGG	39.84	500.79	0.0795543	hsa-mir-886
GAUUUCAGUGGAGUGAAGUU	0.19	2.45	0.077551	hsa-mir-205
GGGGGUCCCCGGUGCUCGGAUC	0.56	7.35	0.0761905	hsa-mir-615
CAGAGCUUAGCUGAUUGGUGAAC	0.19	2.7	0.0703704	hsa-mir-27b
CAGUGCCUCGGCAGUGCAGCC	0.19	2.7	0.0703704	hsa-mir-33b
AGAGCUUAGCUGAUUGGUGA	0.38	5.88	0.0646259	hsa-mir-27b
AGAGCUUAGCUGAUUGGUGAAC	1.13	18.14	0.0622933	hsa-mir-27b
CAGAGCUUAGCUGAUUGGUGAACA	1.13	18.14	0.0622933	hsa-mir-27b
GGGUCGGAGUUAGCUCAAGCGGUU	26.49	455.44	0.0581635	hsa-mir-886
GGGUUCCUGGCAUGCUGAUU	1.69	29.91	0.0565028	hsa-mir-23b
UGUUGUCACGGCCUCAAUG	0.19	3.43	0.0553936	hsa-mir-32
GCUGCGCUUGGAUUUCGUCCC	0.19	4.17	0.0455635	hsa-mir-191
CGUGUGUGAGGCGGGUG	0.38	8.82	0.0430839	hsa-mir-33b
CAUCUCUGUGCUGGGGUU	0.19	4.66	0.0407725	hsa-mir-886
GAUUUCAGUGGAGUGAAGUUCA	1.13	30.64	0.0368799	hsa-mir-205
GUCCCUGUUCGGGCGCCA	0.94	25.74	0.036519	hsa-mir-1274b
GGGUCGGAGUUAGCUCAAGC	0.19	5.64	0.0336879	hsa-mir-886
GUCCCUGUUCAGGCGCCA	0.19	5.64	0.0336879	hsa-mir-1274a
GGGUCGGAGUUAGCUCAAGCG	0.19	5.88	0.0323129	hsa-mir-886
AGGUUGGGAUCGGUUGCAAUGCU	12.21	438.53	0.027843	hsa-mir-92a-1
AGGUUGGGAUCGGUUGCAAUG	0.19	6.86	0.0276968	hsa-mir-92a-1
AUCUCGCUGGGGCCUCCA	0.19	7.6	0.025	hsa-mir-720
UCUCGCUGGGGCCUCCA	0	13.73	0	hsa-mir-720
GAUUUCAGUGGAGUGAAGUUC	0	5.64	0	hsa-mir-205
AGGCGGAGACUUGGGCAAUUGCUGGA	0	3.92	0	hsa-mir-25
GGGGUUCCUGGGGAUGGGAUUUG	0	3.92	0	hsa-mir-23a
AGGUUGGGAUCGGUUGCAAU	0	3.68	0	hsa-mir-92a-1
GAGGUAGUAGGUUGCAUA	0	3.43	0	hsa-let-7d
AGACACAUUUGGAGAGGGAACC	0	2.94	0	hsa-mir-642
CGGGCGUGGUGGUGGGGG	0	2.45	0	hsa-mir-1268

## Sheet: mRNA
Sequence	Nuclear	Cytoplsamic	N/C	Gene
AGGACCCGUGUGAAGACGCUGGCCAUGG	12.4	0	N.A.	NM_005471.4
CCCGUACUAAGCAGACUG	10.71	0	N.A.	NM_021059.2,NM_001005464.2,NM_001123375.1
AAGCCAAGACUGAGCCGG	7.7	0	N.A.	NM_005252.2
ACGAAGACUGAGCGGUUG	7.33	0	N.A.	NM_031314.2,NM_001077443.1,NM_001077442.1,NM_004500.3
GCAGAACGGAUUGCAGGG	7.33	0	N.A.	NM_014316.2
GCUCGUGGGUUGGCAGUA	6.58	0	N.A.	NM_001040437.1,NM_001040438.1
AAGUGUUGGGAUUACAGGCGUGAG	6.01	0	N.A.	NM_133370.2,NM_152263.2,NM_001098414.1,NM_198484.3,NM_001130929.1,NM_032982.2,NM_032983.2,NM_147781.2,NM_147783.2,NM_147780.2,NM_001908.3,NM_147782.2,NM_170774.1,NM_014737.2,NM_145909.2,NM_021061.3,NM_001109689.2,NM_144724.1,NM_138287.3,NM_000140.3,NM_001012515.2,NM_016540.2,NM_002618.3,NM_177966.5,NM_182901.2,NM_020642.3,NM_001678.3,NM_152914.2,NM_014157.2,NM_000440.2,NM_001031732.2
GCGCUAGAGAGAAACAUG	6.01	0	N.A.	NM_001550.2
UAGUCGAGGCAAGACGUG	6.01	0	N.A.	NM_002198.2
UUGCCUGGGCUGGACGUG	6.01	0	N.A.	NM_001827.1
CGGAGGAGGCAGGAACCG	5.83	0	N.A.	NM_001043351.1,NM_001043352.1,NM_153649.3,NM_001043353.1
CUAGAACGAGCUGGAGGA	5.26	0	N.A.	NM_001113182.1,NM_005104.3
UGGAACUGGCAGGCACCG	5.26	0	N.A.	NM_000024.4
AGCGGGAGAACGAUAAUG	5.07	0	N.A.	NM_002923.2
AGAAGACAUGGAUGAUGAGCGCCUUAA	4.89	0	N.A.	NM_030979.2,NM_002568.3
CACGGCGAAAUGAGACUG	4.89	0	N.A.	NM_004990.2
GACGAAGACUGAGCGGUUG	4.89	0	N.A.	NM_001077442.1,NM_004500.3,NM_031314.2,NM_001077443.1
AAGUGUUGGGAUUACAGGUGUG	4.7	0	N.A.	NM_021623.1,NM_024715.3,NM_178126.2,NM_182757.2,NM_030774.2,NM_001040061.1,NM_001130054.1,NM_032378.3
ACAGAUGAUGGUUGUGUCUGAUG	4.51	0	N.A.	NM_004922.2,NM_198597.1
GCCUGACUGAGAAGAGGA	4.51	0	N.A.	NM_002970.1
GGGUGGACAAGUGGCGUG	4.51	0	N.A.	NM_020127.2,NM_001126337.1
GUGGGUUGGCAGUAUGAG	4.51	0	N.A.	NM_001040437.1,NM_001040438.1
ACCGGCGAGGAAUAGGA	4.32	0	N.A.	NM_198589.1,NM_001728.2
ACGGUGUGGAGCGGAGGC	4.32	0	N.A.	NM_003127.2,NM_001130438.1
GCUGGGACUACAGGCAUG	4.32	0	N.A.	NM_001005369.1,NM_005497.3,NM_001080383.1,NM_001678.3,NM_018999.2,NM_001134223.1,NM_022832.3,NM_024636.2,NM_032828.2,NM_080664.2,NM_004101.2,NM_152794.2,NM_022462.3,NM_152795.2,NM_032285.2,NM_001031727.2,NM_001135608.1,NM_015071.4,NM_080863.4,NM_182832.2,NM_022916.4,NM_017712.2,NM_016418.5,NM_181830.2,NM_181829.2,NM_000268.3,NM_181833.2,NM_181828.2,NM_181832.2,NM_032831.2,NM_001126340.1,NM_015276…
AAGUGUUGGGAUUAUAGGCAUG	4.13	0	N.A.	NM_001080435.1,NM_018242.2
CCAGAGAGAACGAACGUG	4.13	0	N.A.	NM_004235.4
CUGACUGGUGUGAGAUGG	4.13	0	N.A.	NM_052941.4
CGGCGAACGCGGAGAGCA	3.95	0	N.A.	NM_000980.2
AGACGAAGACUGAGCGGUUG	3.76	0	N.A.	NM_001077443.1,NM_001077442.1,NM_004500.3,NM_031314.2
AGCGAUGAUGAGAUAGCCAGGCUGAAG	3.76	0	N.A.	NM_001640.3
CCUGAGUAGCUGGGACUA	3.76	0	N.A.	NM_172071.2,NM_018958.2,NM_182832.2,NM_022916.4,NM_017712.2,NM_021915.2,NM_032932.3,NM_207429.2,NM_020375.2,NM_001079512.2,NM_152357.2,NM_153714.2,NM_018999.2,NM_032828.2,NM_012099.1,NM_020922.2,NM_001002838.1,NM_000283.2,NM_001941.3,NM_024423.2,NM_017563.3,NM_030945.2,NM_181435.4,NM_178135.2,NM_007220.3,NM_018138.3,NM_001134415.1,NM_015078.2,NM_000148.3,NM_017853.1,NM_017873.2,NM_177999.1,NM_001…
GCGGAGCAGAACGGAUUG	3.76	0	N.A.	NM_014316.2
CAGCAUGAUGAAGAAGGACGCGCUGACG	3.57	0	N.A.	NM_005354.4
GCAGUUGACUAGCACCUG	3.57	0	N.A.	NM_002928.3
UAGCUGAGCGUUGGGCUG	3.57	0	N.A.	NM_000895.1
AAAGUGUUGGGAUUACAGGCG	3.38	0	N.A.	NM_001012515.2,NM_016540.2,NM_002618.3,NM_177966.5,NM_182901.2,NM_020642.3,NM_001678.3,NM_152914.2,NM_000440.2,NM_001031732.2,NM_133370.2,NM_152263.2,NM_001098414.1,NM_198484.3,NM_001130929.1,NM_032982.2,NM_032983.2,NM_147781.2,NM_147783.2,NM_147780.2,NM_001908.3,NM_147782.2,NM_170774.1,NM_014737.2,NM_145909.2,NM_021061.3,NM_001109689.2,NM_144724.1,NM_138287.3,NM_001040061.1,NM_018340.2,NM_001099…
GACGAUGAUGAAGAUGAUUCUGAUG	3.38	0	N.A.	NM_016312.2
GAGCAGUGAUGAGAUCUGGCUCUGAGCCG	3.38	0	N.A.	NM_032780.2
GCGGCUCGGGACGGAGGA	3.38	0	N.A.	NM_001128148.1,NM_003234.2
GUGACUAAGAUGGAAGCG	3.38	0	N.A.	NM_002796.2
UGGGAUCAUGGUAGAUGG	3.38	0	N.A.	NM_005516.4
CACAGAUGAUGGUUGUGUCUGAUG	3.19	0	N.A.	NM_004922.2,NM_198597.1
CAGUGAGACGGACUUACGCAUCCUGGG	3.19	0	N.A.	NM_020307.2
GCGCGAUCUCGGCUCACUG	3.19	0	N.A.	NM_020552.3,NM_180703.1,NM_180699.1,NM_001130137.1,NM_001130138.1,NM_020851.2,NM_001130136.1,NM_001025266.1,NM_153451.2,NM_001099677.1,NM_020844.2,NM_001135036.1,NM_025115.2,NM_178858.4,NM_004285.3,NM_030774.2,NM_001130842.1,NM_020652.2,NM_001296.4,NM_003309.2,NM_000353.2,NM_020673.2,NM_032423.2,NM_002393.3,NM_032472.3,NM_203342.1,NM_004437.2,NM_203343.1,NM_032833.3,NM_182487.2,NM_020119.3,NM_022…
GCUGGGACUACAGGCGUG	3.19	0	N.A.	NM_001105194.1,NM_173075.3,NM_000051.3,NM_138292.3,NM_017877.3,NM_145298.5,NM_153371.3,NM_016418.5,NM_181830.2,NM_181829.2,NM_000268.3,NM_181833.2,NM_181828.2,NM_181832.2,NM_017994.4,NM_015044.3,NM_176871.2,NM_002393.3,NM_033393.2,NM_020923.1,NM_018931.2,NM_173537.2,NM_152698.2,NM_001105193.1,NM_001105195.1
UCGCUAUGAUGAUGGA	3.19	0	N.A.	NM_024870.2,NM_025170.4
CUCUUAGCUUGUCGGGGA	3.01	0	N.A.	NM_006082.2
CUGUCGCCCAGGCUGGAGUGCAGUG	3.01	0	N.A.	NM_003333.3,NM_001033930.1,NM_019119.3,NM_017644.3,NM_006774.4,NM_025115.2,NM_007054.5,NM_003190.3,NM_001029955.3,NM_005433.3,NM_018138.3,NM_001134415.1,NM_181846.1,NM_024638.2,NM_006496.2,NM_004857.3,NM_001100423.1,NM_001100424.1,NM_001100422.1,NM_015535.2,NM_024865.2,NM_021064.3,NM_022444.3,NM_213598.2,NM_001080480.1,NM_001079525.1,NM_006452.3,NM_001079524.1,NM_033355.3,NM_001080125.1,NM_001080…
GCUGAGAGUGCGGAGUG	3.01	0	N.A.	NM_002568.3
GCUGGAACGGGAGUACUG	3.01	0	N.A.	NM_139014.2,NM_139012.2,NM_139013.2,NM_001315.2
GUCUGGUCGCGGCAAAGG	3.01	0	N.A.	NM_003545.3,NM_003544.2,NM_003542.3
GUGGACAAGUGGCGUGUG	3.01	0	N.A.	NM_020127.2,NM_001126337.1
GCACGAUCUCGGCUCACUGCA	2.82	0	N.A.	NM_017638.2,NM_001127350.1,NM_007350.3,NM_032828.2,NM_198229.2,NM_002926.3,NM_198468.2,NM_001040665.1,NM_152999.3,NM_006774.4,NM_032444.2,NM_144600.2,NM_001993.3,NM_030918.5,NM_000990.4,NM_182612.2,NM_018073.5,NM_002285.2,NM_001025108.1,NM_001005192.1,NM_145309.1,NM_001432.2,NM_152906.4,NM_020826.2,NM_020443.3,NM_014947.3,NM_006502.2,NM_020704.2,NM_201636.1,NM_001060.4,NM_000140.3,NM_001012515.2,…
GCCGGACCCAGACUGGUAG	2.82	0	N.A.	NM_018946.3
UGGACAUCAAGCUGGCAG	2.82	0	N.A.	NM_173354.3
AAAGUGCUGGGAUUAUAGGCGUG	2.63	0	N.A.	NM_017831.3,NM_025073.2,NM_001102396.1,NM_014934.3,NM_198968.2,NM_015110.3,NM_032828.2,NM_001001551.1,NM_024917.4,NM_015276.1,NM_031904.3,NM_016065.3,NM_020714.1,NM_032831.2,NM_001126340.1,NM_001007561.2,NM_018410.3,NM_019067.4
ACCAGAGAGAACGAACGUG	2.63	0	N.A.	NM_004235.4
AGACUGACGAGUGCGGUG	2.63	0	N.A.	NM_005239.4
CCGUAGAGGAAGACACUG	2.63	0	N.A.	NM_015994.2
CGGCAAAUGGCGGACUUC	2.63	0	N.A.	NM_022170.1,NM_031992.1
CUGUUGCCCAGGCUGGAGUGCAGUG	2.63	0	N.A.	NM_001017980.2,NM_003359.2,NM_080671.2,NM_005026.3,NM_144628.2,NM_018225.2,NM_014005.3,NM_138348.4,NM_000786.3,NM_002614.3,NM_001007538.1,NM_138691.2,NM_032317.2,NM_000446.4,NM_021176.2,NM_001081686.1,NM_175883.1,NM_032453.1,NM_001126129.1,NM_000284.2,NM_017924.2,NM_017831.3,NM_178126.2,NM_012096.2,NM_014442.2,NM_015551.1,NM_080660.2,NM_152699.4,NM_001034841.2,NM_032546.2,NM_198450.3,NM_001109754…
GAGACUGACGAGUGCGGUG	2.63	0	N.A.	NM_005239.4
GCAUGAUCAUGGCUCACUG	2.63	0	N.A.	NM_207411.3,NM_207430.2,NM_001776.4,NM_001098175.1,NM_001100624.1,NM_018439.3,NM_001004313.1
GCAUGAUUUUGGCUCACUG	2.63	0	N.A.	NM_012409.2
UAGCUGGGACUACAGGCG	2.63	0	N.A.	NM_173075.3,NM_000051.3,NM_138292.3,NM_017877.3,NM_145298.5,NM_153371.3,NM_016418.5,NM_181830.2,NM_181829.2,NM_000268.3,NM_181833.2,NM_181828.2,NM_181832.2,NM_017994.4,NM_005602.5,NM_001128855.1,NM_032620.2,NM_133644.2,NM_000245.2,NM_001127500.1,NM_001126049.1,NM_024511.5,NM_138400.1,NM_017924.2,NM_001042.2,NM_014388.5,NM_153261.4,NM_018225.2,NM_001080435.1,NM_020922.2,NM_001002838.1,NM_001099414…
GAAGAUGGCGAAGACGUA	2.44	0	N.A.	NM_016530.2
GAGCAGUGAUGAGAUCUGGCUCUGAGCCGA	2.44	0	N.A.	NM_032780.2
GAGGCAGAGCUUGCAGUG	2.44	0	N.A.	NM_153687.2,NM_032180.2,NM_001101653.1,NM_014186.3,NM_001167.2,NM_002198.2,NM_005160.3,NM_005816.4,NM_198196.2,NM_005216.4,NM_001081450.1,NM_006864.2,NM_001047605.1,NM_182612.2,NM_032831.2,NM_001126340.1,NM_213566.1,NM_004401.2,NM_032160.2,NM_005829.4,NM_019046.1,NM_004782.3,NM_032285.2,NM_001031727.2,NM_001128930.1,NM_004901.3,NM_001024215.1,NM_022340.2,NM_015458.3,NM_005707.1
GUGAACGGUGUGGAGCGG	2.44	0	N.A.	NM_003127.2,NM_001130438.1
UCGGAGGAGGCCAAGGUG	2.44	0	N.A.	NM_000976.2
UGAGACUGAAAGAUUUAGCC	2.44	0	N.A.	NM_002467.3
UGGACGCAGGCGGAUCUC	2.44	0	N.A.	NM_001412.3
AGAGACUGACGAGUGCGG	2.25	0	N.A.	NM_005239.4
AUGGACGAAGCGGAUCGG	2.25	0	N.A.	NM_001229.2,NM_032996.1
CAGCGAUGGAUGUGGAUA	2.25	0	N.A.	NM_014248.2
CCCAGGCUGGAGUGCAGUGG	2.25	0	N.A.	NM_004590.2,NM_178126.2,NM_012096.2,NM_014442.2,NM_133272.2,NM_133269.2,NM_133278.2,NM_133274.2,NM_002000.2,NM_133277.2,NM_133271.2,NM_133273.2,NM_012192.3,NM_175883.1,NM_002393.3,NM_001167.2,NM_003342.4,NM_006208.2,NM_001034841.2,NM_032546.2,NM_198450.3,NM_138432.2,NM_032730.4,NM_014586.1,NM_005431.1,NM_001109754.1,NM_002837.3,NM_016575.1,NM_153371.3,NM_003622.2,NM_178542.3,NM_197948.2,NM_197950…
CGGAGCGAAGAGAACCGG	2.25	0	N.A.	NM_014905.3
CGGCGCAGUGUUGGGACUG	2.25	0	N.A.	NM_007355.2
CUCGGAGGAGGCCAAGGUG	2.25	0	N.A.	NM_000976.2
CUCGUGGGUUGGCAGUA	2.25	0	N.A.	NM_001040438.1,NM_001040437.1
GAGCAGUGAUGAGAUCUGGCUCUGAGC	2.25	0	N.A.	NM_032780.2
GCAGCUGGAACGGGAGUA	2.25	0	N.A.	NM_139012.2,NM_139013.2,NM_001315.2,NM_139014.2
GCAGGAGGCUGAUGAAGG	2.25	0	N.A.	NM_198157.1,NM_003347.2
GCCUGCUACGGUGGACUG	2.25	0	N.A.	NM_007021.3
GCGAAGGACAUUUGGGCUG	2.25	0	N.A.	NM_004417.2
GUCUCUGAUGAAGCCUG	2.25	0	N.A.	NM_018214.4
UCCAGUAAGGAGUCGGGG	2.25	0	N.A.	NM_021960.3,NM_182763.1
UCCUGAGAGUCGGAGCCA	2.25	0	N.A.	NM_020892.2,NM_001102595.1,NM_001102594.1
UCUACUGGAGUGGAAGGUCUAUU	2.25	0	N.A.	NM_001964.2
AAUUCGUAGCAAAUUCUGUGGCAGU	2.07	0	N.A.	NM_006597.3,NM_153201.1
AGAAGACAUGGAUGAUGAGCGCC	2.07	0	N.A.	NM_002568.3,NM_030979.2
AGACUGGUAGUGAGGCUU	2.07	0	N.A.	NM_018946.3
AGCGAAGAGAACCGGUCG	2.07	0	N.A.	NM_014905.3
AGUCUAUGAUGAACACUGAGGCAG	2.07	0	N.A.	NM_024037.1
CAGGCUGGAGUGCAGUGGCG	2.07	0	N.A.	NM_181869.1,NM_181861.1,NM_001160.2,NM_013229.2,NM_016206.2,NM_001135036.1,NM_025115.2,NM_004285.3,NM_030774.2,NM_182487.2,NM_020119.3,NM_007054.5,NM_017853.1,NM_005763.3,NM_003190.3,NM_001029955.3,NM_005433.3,NM_018138.3,NM_001134415.1,NM_181846.1,NM_001130137.1,NM_001130138.1,NM_020851.2,NM_001130136.1,NM_001025266.1,NM_024638.2,NM_001013659.2,NM_152608.3,NM_006496.2,NM_000318.2,NM_001079867.1,…
CUUGAUGAUGAAGUAGGUGGUCCUGAAA	2.07	0	N.A.	NM_020673.2
GCUCGGGUCGUUGUGGUG	2.07	0	N.A.	NM_001280.2
UCCGAGUAGCUGGGACUA	2.07	0	N.A.	NM_138368.3,NM_152634.2,NM_080863.4,NM_153261.4,NM_001655.3
AAGCAGAGGUUGUAGUG	1.88	0	N.A.	NM_001122842.1,NM_181782.3
AGACGAAGACUGAGCGGU	1.88	0	N.A.	NM_004500.3,NM_031314.2,NM_001077443.1,NM_001077442.1
AGCGCGGGCUGAGCGCUGCCAGUC	1.88	0	N.A.	NM_032042.4
AGGAAGUAGAACGCCGGC	1.88	0	N.A.	NM_017969.1
CGGGCUGGAACUGGCAGG	1.88	0	N.A.	NM_000024.4
CUGACAUGUUGAGGACUA	1.88	0	N.A.	NM_024537.1
GAGUCUGGAGACGACGUG	1.88	0	N.A.	NM_001025071.1,NM_005617.3,NM_001025070.1
GCAUGAUCUCGGCUCACUGCA	1.88	0	N.A.	NM_007363.3,NM_181489.5,NM_198445.2,NM_022059.2,NM_004464.3,NM_033143.2,NM_001033030.1,NM_006208.2,NM_006750.3,NM_001111283.1,NM_001111284.1,NM_000618.3,NM_001039547.1,NM_014877.3,NM_001100389.1,NM_014573.2,NM_198194.1,NM_004099.4,NM_001100423.1,NM_001100424.1,NM_001100422.1,NM_015535.2,NM_001100876.1,NM_174933.3,NM_001003811.1,NM_001652.3,NM_138403.3,NM_024637.4,NM_022835.2,NM_005506.2,NM_025188…
GCAUUCGGGCCGAGAUGU	1.88	0	N.A.	NM_004048.2
GCCUGGGCUGGACGUGGU	1.88	0	N.A.	NM_001827.1
GUGCUGGGAUUACAGGCGUG	1.88	0	N.A.	NM_001017368.1,NM_057178.3,NM_024541.2,NM_176816.3,NM_020714.1,NM_014484.3,NM_133477.2,NM_004590.2,NM_017644.3,NM_022817.2,NM_012405.3,NM_024989.3,NM_031912.3,NM_001010922.2,NM_014418.3,NM_012468.4,NM_018947.4,NM_152906.4,NM_012164.3,NM_145034.2,NM_178832.3,NM_001098831.1,NM_001167.2,NM_014897.1,NM_144578.3,NM_001004302.2,NM_147187.1,NM_003842.3,NM_145207.2,NM_173558.3,NM_004140.3,NM_002646.3,NM_…
UCGUGGAAGCAGGACUGC	1.88	0	N.A.	NM_001098204.1,NM_004966.3
GCAUGAUCUUGGCUCACUG	9.96	0.25	39.84	NM_001031732.2,NM_133370.2,NM_198581.2,NM_001039709.1,NM_005093.3,NM_001032999.2,NM_020949.2,NM_001039884.2,NM_014005.3,NM_004927.2,NM_019034.2,NM_001097638.2,NM_000511.5,NM_001110781.1,NM_021061.3,NM_001109689.2,NM_001527.2,NM_014352.2,NM_007354.1,NM_207344.3,NM_003423.2,NM_003622.2,NM_030755.4,NM_198839.1,NM_033303.3,NM_001004343.1,NM_152458.5,NM_032831.2,NM_001126340.1
AAGUGUUGGGAUUACAGGCG	7.33	0.25	29.32	NM_147782.2,NM_170774.1,NM_014737.2,NM_145909.2,NM_021061.3,NM_001109689.2,NM_144724.1,NM_138287.3,NM_001040061.1,NM_018340.2,NM_001099455.1,NM_018477.2,NM_007270.3,NM_000140.3,NM_001012515.2,NM_016540.2,NM_002618.3,NM_177966.5,NM_182901.2,NM_020642.3,NM_001678.3,NM_152914.2,NM_014157.2,NM_000440.2,NM_001031732.2,NM_133370.2,NM_152263.2,NM_001098414.1,NM_198484.3,NM_001130929.1,NM_032982.2,NM_032…
GCAUGAUCUCGGCUCACU	6.39	0.25	25.56	NM_001100422.1,NM_015535.2,NM_001100876.1,NM_174933.3,NM_001003811.1,NM_001652.3,NM_138403.3,NM_024637.4,NM_022835.2,NM_005506.2,NM_025188.2,NM_130446.2,NM_182515.2,NM_032116.3,NM_001014380.1,NM_138287.3,NM_133480.1,NM_020714.1,NM_007363.3,NM_181489.5,NM_198445.2,NM_015033.2,NM_001127697.1,NM_001127696.1,NM_004993.5,NM_030660.4,NM_022059.2,NM_004464.3,NM_033143.2,NM_001033030.1,NM_006208.2,NM_006…
AAGUGCUGGGAUUAUAGGCGUG	4.7	0.25	18.8	NM_017831.3,NM_025073.2,NM_001102396.1,NM_014934.3,NM_198968.2,NM_015110.3,NM_032828.2,NM_001001551.1,NM_024917.4,NM_001254.3,NM_015276.1,NM_031904.3,NM_016065.3,NM_020714.1,NM_032831.2,NM_001126340.1,NM_001007561.2,NM_018410.3,NM_019067.4
AAGUGCUGGGAUUACAGGCGUG	22.92	1.23	18.6341	NM_005895.3,NM_182612.2,NM_022463.3,NM_020554.3,NM_020553.3,NM_173657.1,NM_033410.2,NM_001017980.2,NM_152392.2,NM_020710.1,NM_001102421.1,NM_001102420.1,NM_006007.2,NM_001130137.1,NM_001130138.1,NM_020851.2,NM_001130136.1,NM_014732.2,NM_021967.2,NM_022978.1,NM_022549.2,NM_003561.1,NM_018000.2,NM_015197.2,NM_001100913.1,NM_194356.1,NM_001980.2,NM_000767.4,NM_016946.4,NM_002990.3,NM_016217.2,NM_020…
AAGUGUUGGGAUUACAGGCA	4.32	0.25	17.28	NM_030660.4,NM_080863.4,NM_001100389.1,NM_016206.2,NM_018212.4,NM_001008493.1,NM_024620.3,NM_001013659.2,NM_020702.3,NM_024955.5,NM_001102371.1,NM_020894.2,NM_001655.3,NM_006606.2,NM_014877.3,NM_182487.2,NM_001127697.1,NM_001127696.1,NM_004993.5
CCCAGGCUGGAGUGCAGUGGUG	8.27	0.49	16.8776	NM_018189.3,NM_001699.4,NM_021913.3,NM_001135036.1,NM_001017980.2,NM_003359.2,NM_001876.3,NM_080671.2,NM_152475.2,NM_005026.3,NM_000243.2,NM_181724.2,NM_005188.2,NM_144628.2,NM_032828.2,NM_014744.2,NM_001140.3,NM_001008528.1,NM_018225.2,NM_181877.3,NM_014005.3,NM_014828.2,NM_001128855.1,NM_032620.2,NM_133644.2,NM_020714.1,NM_007236.4,NM_000990.4,NM_012241.3,NM_014959.2,NM_138348.4,NM_001010922.2,…
CCAGGCUGGAGUGCAGUGGUG	3.76	0.25	15.04	NM_021642.2,NM_012214.2,NM_021176.2,NM_001081686.1,NM_170774.1,NM_014737.2,NM_130807.2,NM_175883.1,NM_020447.3,NM_001010853.1,NM_032453.1,NM_033410.2,NM_182926.2,NM_001079522.1,NM_024656.2,NM_001126129.1,NM_001004053.2,NM_206914.1,NM_015433.2,NM_018340.2,NM_001099455.1,NM_016496.4,NM_207322.2,NM_000284.2,NM_001130143.1,NM_020714.1,NM_032105.1,NM_002481.2,NM_033103.3,NM_015078.2,NM_012069.2,NM_000…
AAGUGUUGGGAUUACAGGCGUG	14.66	0.98	14.9592	NM_147781.2,NM_147783.2,NM_147780.2,NM_001908.3,NM_147782.2,NM_170774.1,NM_014737.2,NM_145909.2,NM_021061.3,NM_001109689.2,NM_144724.1,NM_138287.3,NM_001040061.1,NM_018477.2,NM_007270.3,NM_000140.3,NM_001012515.2,NM_016540.2,NM_002618.3,NM_177966.5,NM_182901.2,NM_020642.3,NM_001678.3,NM_152914.2,NM_014157.2,NM_000440.2,NM_001031732.2,NM_133370.2,NM_152263.2,NM_001098414.1,NM_198484.3,NM_001130929…
GCUGGAGUGUAGUGGUG	3.57	0.25	14.28	NM_178517.3,NM_014484.3,NM_001127192.1,NM_003418.4,NM_001127195.1,NM_001127193.1,NM_001127196.1,NM_001127194.1,NM_152596.2,NM_032423.2,NM_144707.1
AAGUGUUGGGAUUACAGGCAUGAG	3.38	0.25	13.52	NM_001102371.1,NM_020894.2,NM_001655.3,NM_006606.2,NM_014877.3,NM_182487.2,NM_001127697.1,NM_001127696.1,NM_004993.5,NM_030660.4,NM_080863.4,NM_001100389.1,NM_024620.3,NM_001013659.2,NM_020702.3,NM_024955.5
AUCGAGACCAUCCUGGCUAA	3.38	0.25	13.52	NM_015458.3,NM_198276.1,NM_004782.3,NM_021706.2,NM_002287.3,NM_005440.4,NM_001042480.1,NM_001042479.1,NM_017856.2,NM_001100623.1,NM_017958.2,NM_015147.2,NM_004744.3,NM_001114133.1,NM_024875.3,NM_138801.1,NM_001167.2,NM_030626.1,NM_001099678.1,NM_001080.3,NM_170740.1,NM_001081450.1,NM_006864.2,NM_001128930.1,NM_004901.3,NM_133444.1,NM_020134.3,NM_052941.4,NM_133456.1,NM_033109.3,NM_001083625.1,NM_…
AAGUGUUGGGAUUACAGGCAUG	6.58	0.49	13.4286	NM_020702.3,NM_024955.5,NM_001102371.1,NM_020894.2,NM_001655.3,NM_006606.2,NM_014877.3,NM_182487.2,NM_001127697.1,NM_001127696.1,NM_004993.5,NM_030660.4,NM_080863.4,NM_001100389.1,NM_024620.3,NM_001013659.2
GCAUGAUCUCGGCUCACUG	12.97	0.98	13.2347	NM_025188.2,NM_130446.2,NM_182515.2,NM_032116.3,NM_001014380.1,NM_138287.3,NM_133480.1,NM_020714.1,NM_007363.3,NM_181489.5,NM_198445.2,NM_022059.2,NM_004464.3,NM_033143.2,NM_001033030.1,NM_006208.2,NM_006750.3,NM_001111283.1,NM_001111284.1,NM_000618.3,NM_001039547.1,NM_014877.3,NM_001100389.1,NM_014573.2,NM_198194.1,NM_004099.4,NM_001100423.1,NM_001100424.1,NM_001100422.1,NM_015535.2,NM_001100876…
CAGGCUGGAGUGCAGUGG	3.19	0.25	12.76	NM_183050.2,NM_178520.2,NM_000573.3,NM_000651.4,NM_001776.4,NM_001098175.1,NM_021642.2,NM_012214.2,NM_021176.2,NM_001081686.1,NM_170774.1,NM_014737.2,NM_130807.2,NM_175883.1,NM_020447.3,NM_001010853.1,NM_032453.1,NM_033410.2,NM_182926.2,NM_001079522.1,NM_024656.2,NM_001126129.1,NM_001004053.2,NM_206914.1,NM_015433.2,NM_018340.2,NM_001099455.1,NM_016496.4,NM_207322.2,NM_000284.2,NM_005829.4,NM_001…
UAGAACGAGCUGGAGGAU	3.19	0.25	12.76	NM_001113182.1,NM_005104.3
GCACGAUCUUGGCUCACUG	6.2	0.49	12.6531	NM_032484.3,NM_001134672.1,NM_022063.2,NM_177538.2,NM_138635.3,NM_145309.1,NM_015278.3,NM_014563.4,NM_001011658.2,NM_001042552.1,NM_001042553.1,NM_198584.2,NM_006282.2,NM_145207.2,NM_031485.2,NM_003417.3,NM_012164.3,NM_024753.3,NM_024511.5,NM_144997.5,NM_012193.2,NM_001083621.1,NM_014870.3,NM_020456.2,NM_001127482.1,NM_015026.2,NM_000151.2,NM_030641.3,NM_014056.3,NM_001099668.1,NM_001099669.1,NM_…
CCCAGGCUGGAGUGCAGUGGCA	9.21	0.74	12.4459	NM_173654.1,NM_024511.5,NM_015197.2,NM_001100913.1,NM_178844.2,NM_152357.2,NM_015640.3,NM_001018069.1,NM_001018067.1,NM_001018068.1,NM_021915.2,NM_001033030.1,NM_006750.3,NM_001111283.1,NM_001111284.1,NM_000618.3,NM_001039547.1,NM_001652.3,NM_024637.4,NM_025188.2,NM_130446.2,NM_032116.3,NM_001014380.1,NM_133480.1,NM_022896.1,NM_207344.3,NM_001039709.1,NM_005093.3,NM_001032999.2,NM_020949.2,NM_001…
CUGGAGUGCAGUGGUG	3.01	0.25	12.04	NM_004286.4,NM_017924.2,NM_001123328.1,NM_017831.3,NM_012099.1,NM_001043318.1,NM_194278.3,NM_018129.3,NM_015852.3,NM_080706.3,NM_018727.5,NM_080705.3,NM_080704.3,NM_004590.2,NM_201524.1,NM_005682.4,NM_178126.2,NM_012096.2,NM_138368.3,NM_018212.4,NM_001008493.1,NM_005497.3,NM_001080383.1,NM_152396.2,NM_014601.3,NM_003679.3,NM_017623.4,NM_199078.2,NM_017437.1,NM_002393.3,NM_001100167.1,NM_001100163…
AGUUGGAGGGAGGCAGGGAAU	2.82	0.25	11.28	NM_014470.2
AAGUGUUGGGAUUACAGGUG	5.26	0.49	10.7347	NM_178126.2,NM_182757.2,NM_030774.2,NM_001040061.1,NM_001130054.1,NM_032378.3,NM_021623.1,NM_024715.3
AAAGUGUUGGGAUUACAGGCAUG	2.63	0.25	10.52	NM_182487.2,NM_001127697.1,NM_001127696.1,NM_004993.5,NM_030660.4,NM_080863.4,NM_001100389.1,NM_024620.3,NM_001013659.2,NM_020702.3,NM_024955.5,NM_001102371.1,NM_020894.2,NM_001655.3,NM_006606.2,NM_014877.3
AAAGUGUUGGGAUUACAGGCGUG	2.63	0.25	10.52	NM_032982.2,NM_032983.2,NM_147781.2,NM_147783.2,NM_147780.2,NM_001908.3,NM_147782.2,NM_170774.1,NM_014737.2,NM_145909.2,NM_021061.3,NM_001109689.2,NM_144724.1,NM_138287.3,NM_001040061.1,NM_018477.2,NM_007270.3,NM_000140.3,NM_001012515.2,NM_016540.2,NM_002618.3,NM_177966.5,NM_182901.2,NM_020642.3,NM_001678.3,NM_152914.2,NM_000440.2,NM_001031732.2,NM_133370.2,NM_152263.2,NM_001098414.1,NM_198484.3,…
AGAAUUGAAGAGGAGCUG	2.44	0.25	9.76	NM_080738.3,NM_145861.2,NM_001428.2
CAAUCUCGGCUCACUG	2.44	0.25	9.76	NM_018109.3,NM_016540.2,NM_001111298.1,NM_173672.3,NM_174887.2,NM_003359.2,NM_024809.2,NM_001875.3,NM_001122633.1,NM_001122634.1,NM_001876.3,NM_004845.3,NM_001011657.1,NM_152794.2,NM_022462.3,NM_152795.2,NM_178126.2,NM_080876.2,NM_130807.2,NM_005099.4,NM_001098801.1,NM_152352.3,NM_005038.2,NM_017873.2,NM_177999.1,NM_173511.2,NM_001127899.1,NM_001127898.1,NM_000084.2,NM_007054.5,NM_004696.1,NM_002…
CACCCAGGCUGGAGUGCAGUGGCA	2.44	0.25	9.76	NM_001039591.2,NM_021075.3,NM_001001503.1,NM_001561.4,NM_182609.2,NM_001012659.1,NM_024620.3,NM_015127.3,NM_001048210.1,NM_032797.4,NM_001570.3,NM_012287.4,NM_001007561.2,NM_001010891.3,NM_145309.1,NM_152906.4,NM_032828.2,NM_198229.2,NM_002926.3,NM_001040665.1,NM_152999.3,NM_173531.3,NM_003417.3,NM_144972.3,NM_152426.3,NM_181868.1,NM_181869.1,NM_181861.1,NM_001160.2,NM_013229.2,NM_153346.4,NM_207…
GCACGAUCUCGGCUCACUG	9.21	0.98	9.39796	NM_017831.3,NM_005540.2,NM_017638.2,NM_001127350.1,NM_007350.3,NM_032828.2,NM_198229.2,NM_002926.3,NM_198468.2,NM_001040665.1,NM_152999.3,NM_006774.4,NM_032444.2,NM_144600.2,NM_001993.3,NM_030918.5,NM_000990.4,NM_182612.2,NM_018073.5,NM_002285.2,NM_001025108.1,NM_173531.3,NM_017686.3,NM_001005192.1,NM_145309.1,NM_001432.2,NM_152906.4,NM_020826.2,NM_020443.3,NM_014947.3,NM_006502.2,NM_020704.2,NM_…
UAGCUGGGACUACAGGCA	4.51	0.49	9.20408	NM_000246.3,NM_207309.2,NM_152654.2,NM_003359.2,NM_000961.3,NM_001100423.1,NM_001100424.1,NM_001100422.1,NM_015535.2,NM_004577.3,NM_005763.3,NM_012287.4,NM_213598.2,NM_001018089.1,NM_024611.4,NM_020682.3,NM_020834.2,NM_080723.4,NM_000451.3,NM_018728.2,NM_145060.3,NM_001039535.2,NM_145637.1,NM_030882.2,NM_030780.3,NM_138378.1,NM_013302.3,NM_016952.4,NM_018241.2,NM_017420.3,NM_004230.3,NM_175883.1,…
AAGUGUUGGGAUUACAGGCAU	2.25	0.25	9	NM_001100389.1,NM_016206.2,NM_018212.4,NM_001008493.1,NM_024620.3,NM_001013659.2,NM_020702.3,NM_024955.5,NM_001102371.1,NM_020894.2,NM_001655.3,NM_006606.2,NM_014877.3,NM_182487.2,NM_001127697.1,NM_001127696.1,NM_004993.5,NM_030660.4,NM_080863.4
GGCGGAUGUGGCCAAGUG	2.25	0.25	9	NM_004747.3
GUGGACGCAGGCGGAUCU	2.25	0.25	9	NM_001412.3
UCCUGAUGAUGAAGACUGAAGGUG	4.13	0.49	8.42857	NM_004546.2
AGGGAACGUAGCAGGGCA	2.07	0.25	8.28	NM_021724.2
CAAAUGAACUUCAGACGGACCU	2.07	0.25	8.28	NM_004419.3
AAGUGUUGGGAUUACAGGCGU	1.88	0.25	7.52	NM_147783.2,NM_147780.2,NM_001908.3,NM_147782.2,NM_170774.1,NM_014737.2,NM_145909.2,NM_021061.3,NM_001109689.2,NM_144724.1,NM_138287.3,NM_001040061.1,NM_018340.2,NM_001099455.1,NM_018477.2,NM_007270.3,NM_000140.3,NM_001012515.2,NM_016540.2,NM_002618.3,NM_177966.5,NM_182901.2,NM_020642.3,NM_001678.3,NM_152914.2,NM_014157.2,NM_000440.2,NM_001031732.2,NM_133370.2,NM_152263.2,NM_001098414.1,NM_198484…
AAGUGUUGGGAUUACAGGCGUGA	1.88	0.25	7.52	NM_014157.2,NM_000440.2,NM_001031732.2,NM_133370.2,NM_152263.2,NM_001098414.1,NM_198484.3,NM_001130929.1,NM_032982.2,NM_032983.2,NM_147781.2,NM_147783.2,NM_147780.2,NM_001908.3,NM_147782.2,NM_170774.1,NM_014737.2,NM_145909.2,NM_021061.3,NM_001109689.2,NM_144724.1,NM_138287.3,NM_018477.2,NM_007270.3,NM_000140.3,NM_001012515.2,NM_016540.2,NM_002618.3,NM_177966.5,NM_182901.2,NM_020642.3,NM_001678.3,…
AGUGCAGUGGCGUGAUCUCG	1.88	0.25	7.52	NM_000961.3,NM_182901.2,NM_020642.3,NM_004412.4,NM_176083.2,NM_176081.2,NM_024900.3,NM_005652.2,NM_153717.2,NM_173084.2,NM_152458.5,NM_012164.3,NM_015110.3,NM_001003795.2,NM_173537.2,NM_001135036.1,NM_020710.1,NM_001040441.1,NM_001201.2,NM_033355.3,NM_001080125.1,NM_001080124.1,NM_033356.3,NM_001228.4,NM_004230.3,NM_001007024.1,NM_001007025.1,NM_004871.2,NM_002990.3,NM_000767.4,NM_004602.2,NM_001…
UGAGUUAUUAGAUUGUA	1.88	0.25	7.52	NM_198081.3
AAGUGCUGGGAUUACAGGUG	3.57	0.49	7.28571	NM_000232.3,NM_007054.5,NM_012192.3,NM_020161.2,NM_152826.2,NM_148955.2,NM_003099.3,NM_152608.3,NM_001004313.1,NM_182660.1,NM_013302.3,NM_001130727.1,NM_145048.3,NM_001296.4,NM_018197.2,NM_199426.1,NM_022088.4,NM_007257.5,NM_005955.2,NM_014503.2,NM_006987.2,NM_001104577.1,NM_017986.3,NM_032449.1,NM_152678.2,NM_020748.1,NM_006085.4,NM_015278.3,NM_005668.4,NM_004228.5,NM_017457.4,NM_000961.3,NM_024…
CAGGCUGGAGUGCAGUGGCA	3.38	0.49	6.89796	NM_007220.3,NM_005906.3,NM_001134403.1,NM_001134404.1,NM_001134402.1,NM_182580.2,NM_001134400.1,NM_152426.3,NM_032151.4,NM_001018091.1,NM_001018102.1,NM_001018090.1,NM_015532.3,NM_003764.3,NM_181809.3,NM_181868.1,NM_181869.1,NM_181861.1,NM_001160.2,NM_013229.2,NM_133496.3,NM_001040061.1,NM_001007561.2,NM_001105570.1,NM_145037.2,NM_001134456.1,NM_153346.4,NM_032040.3,NM_013302.3,NM_021020.2,NM_001…
CCAGGCUGGAGUGCAGUGGCA	3.38	0.49	6.89796	NM_153371.3,NM_003622.2,NM_021269.2,NM_178542.3,NM_197948.2,NM_197950.2,NM_022570.4,NM_197949.2,NM_197947.2,NM_001105549.1,NM_001105551.1,NM_001007561.2,NM_021615.4,NM_020853.1,NM_001104546.1,NM_001111298.1,NM_173672.3,NM_001875.3,NM_001122633.1,NM_001122634.1,NM_178126.2,NM_000232.3,NM_001080407.2,NM_001005217.1,NM_207371.3,NM_020714.1,NM_001008530.1,NM_019069.3,NM_020957.1,NM_182612.2,NM_001039…
CCCAGGCUGGAGUGCAGUGGCG	6.58	0.98	6.71429	NM_006879.2,NM_006882.2,NM_018958.2,NM_022151.4,NM_080876.2,NM_006918.4,NM_001024956.2,NM_139242.3,NM_032404.1,NM_024022.1,NM_032401.1,NM_003262.3,NM_001037582.2,NM_178836.2,NM_006733.2,NM_018091.5,NM_001060.4,NM_173827.2,NM_001007559.1,NM_005637.2,NM_024312.3,NM_152654.2,NM_183412.2,NM_033182.5,NM_001014765.1,NM_183413.2,NM_005207.2,NM_000239.2,NM_002644.2,NM_005236.2,NM_001127321.1,NM_001127322…
AAAGUGCUGGGAUUACAGGCGUG	7.89	1.23	6.41463	NM_003622.2,NM_021622.3,NM_001001974.1,NM_020853.1,NM_032173.2,NM_207306.2,NM_020880.3,NM_006774.4,NM_001032363.1,NM_002316.2,NM_014876.4,NM_018672.2,NM_181846.1,NM_003417.3,NM_006496.2,NM_001007538.1,NM_173065.1,NM_173064.1,NM_170743.2,NM_020746.3,NM_001013660.2,NM_004285.3,NM_017873.2,NM_177999.1,NM_015078.2,NM_005433.3,NM_001012755.3,NM_032521.2,NM_030952.1,NM_001008496.2,NM_145060.3,NM_001039…
GCGUGAUCUCGGCUCACUG	3.01	0.49	6.14286	NM_001037165.1,NM_006085.4,NM_173831.3,NM_000961.3,NM_182901.2,NM_020642.3,NM_004412.4,NM_176083.2,NM_176081.2,NM_031912.3,NM_001040157.1,NM_024900.3,NM_012334.2,NM_212550.3,NM_012318.2,NM_005652.2,NM_002349.2,NM_000767.4,NM_152565.1,NM_004602.2,NM_001037328.1,NM_032120.2,NM_138572.2,NM_017712.2,NM_001128159.1,NM_000887.3,NM_001077241.1,NM_182556.2,NM_177538.2,NM_019067.4,NM_005513.2,NM_198557.1,…
CGAUCUCGGCUCACUG	2.82	0.49	5.7551	NM_006089.2,NM_178173.3,NM_182487.2,NM_001001671.2,NM_020119.3,NM_022909.3,NM_005373.2,NM_001012391.1,NM_173827.2,NM_017831.3,NM_005540.2,NM_017638.2,NM_001127350.1,NM_018109.3,NM_007054.5,NM_007350.3,NM_001100879.1,NM_001100880.1,NM_182851.1,NM_032828.2,NM_001007538.1,NM_018212.4,NM_001008493.1,NM_003144.3,NM_024784.2,NM_006425.4,NM_198229.2,NM_002926.3,NM_012318.2,NM_017853.1,NM_207401.1,NM_002…
UCUACUGGAGUGGAAGGUCUAUUG	2.82	0.49	5.7551	NM_001964.2
AGGCUGGAGUGCAGUGGUG	7.7	1.47	5.2381	NM_005829.4,NM_001130143.1,NM_020714.1,NM_000554.4,NM_032105.1,NM_002481.2,NM_014959.2,NM_033103.3,NM_015986.3,NM_015078.2,NM_012069.2,NM_052966.2,NM_000453.2,NM_001025433.1,NM_000903.2,NM_001025434.1,NM_079834.2,NM_000046.3,NM_014402.4,NM_032325.2,NM_000692.3,NM_004286.4,NM_017924.2,NM_001123328.1,NM_017831.3,NM_012099.1,NM_001043318.1,NM_194278.3,NM_018129.3,NM_015852.3,NM_080706.3,NM_018727.5,…
AGAAUUGAAGAGGAGCUGGG	2.44	0.49	4.97959	NM_145861.2,NM_001428.2,NM_080738.3
CAGGCUGGAGUGCAGUGGCAC	2.44	0.49	4.97959	NM_001624.2,NM_005431.1,NM_001109754.1,NM_002837.3,NM_016575.1,NM_153371.3,NM_003622.2,NM_021269.2,NM_178542.3,NM_197948.2,NM_197950.2,NM_022570.4,NM_197949.2,NM_197947.2,NM_001105553.1,NM_001105549.1,NM_001105551.1,NM_001007561.2,NM_021615.4,NM_020853.1,NM_001104546.1,NM_001111298.1,NM_173672.3,NM_001875.3,NM_001122633.1,NM_001122634.1,NM_178126.2,NM_000232.3,NM_001080407.2,NM_001005217.1,NM_001…
CCUGUUGGGACAGUCAGUUGGUAU	2.44	0.49	4.97959	NM_006328.3
GGGCCGGCGGCGGCCGC	2.44	0.49	4.97959	NM_016025.3,NM_001077180.1
GCUGGGACUACAGGCGCC	2.25	0.49	4.59184	NM_001941.3,NM_024423.2,NM_014668.3,NM_207401.1,NM_017563.3,NM_030945.2,NM_181435.4,NM_138287.3,NM_018073.5,NM_024533.3,NM_004857.3,NM_003382.4,NM_000215.3,NM_178135.2,NM_007220.3,NM_003419.3,NM_018138.3,NM_001134415.1,NM_015078.2,NM_004155.3,NM_198532.1,NM_022754.5,NM_000148.3,NM_020714.1,NM_018991.2,NM_001002840.1,NM_032329.4,NM_017853.1,NM_001105570.1,NM_024638.2,NM_016037.3,NM_024865.2,NM_015…
ACCCAGGCUGGAGUGCAGUG	2.07	0.49	4.22449	NM_018340.2,NM_001099455.1,NM_016496.4,NM_207322.2,NM_001130143.1,NM_012069.2,NM_000453.2,NM_001025433.1,NM_000903.2,NM_001025434.1,NM_000046.3,NM_014402.4,NM_012099.1,NM_018129.3,NM_015852.3,NM_004590.2,NM_002813.4,NM_001128835.1,NM_001040273.1,NM_173555.2,NM_013302.3,NM_003281.3,NM_001099645.1,NM_001134223.1,NM_022832.3,NM_024809.2,NM_001134285.1,NM_152909.2,NM_133272.2,NM_133269.2,NM_133278.2,…
CGGAACGAGACUGCACGG	2.07	0.49	4.22449	NM_021103.3
GCUGUGGACCAAGUGAAG	2.07	0.49	4.22449	NM_012101.3
CCAGGCUGGAGUGCAGUGGCG	3.01	0.74	4.06757	NM_015962.4,NM_145283.1,NM_012409.2,NM_001010982.3,NM_001008528.1,NM_001127321.1,NM_001127322.1,NM_012117.2,NM_000525.3,NM_007236.4,NM_000148.3,NM_021238.1,NM_001037330.1,NM_006878.2,NM_002392.2,NM_006881.2,NM_006879.2,NM_006882.2,NM_018958.2,NM_022151.4,NM_080876.2,NM_006918.4,NM_001024956.2,NM_139242.3,NM_032404.1,NM_024022.1,NM_032401.1,NM_003262.3,NM_001037582.2,NM_178836.2,NM_006733.2,NM_019…
AAUUCGUAGCAAAUUCUGUGGCAG	2.82	0.74	3.81081	NM_006597.3,NM_153201.1
UCGGACACCGGCGCGUCUCU	1.88	0.49	3.83673	NM_002229.2
UGACUAUGACGGCAAACUGAGCA	5.26	1.47	3.57823	NM_000918.3
CCCAGGCUGGAGUGCAGUGGC	2.63	0.74	3.55405	NM_207411.3,NM_001004313.1,NM_015352.1,NM_024674.4,NM_001018089.1,NM_024611.4,NM_030945.2,NM_181435.4,NM_000051.3,NM_138292.3,NM_173654.1,NM_024511.5,NM_015197.2,NM_001100913.1,NM_178844.2,NM_152357.2,NM_015640.3,NM_001018069.1,NM_001018067.1,NM_001018068.1,NM_021915.2,NM_001033030.1,NM_006750.3,NM_001111283.1,NM_001111284.1,NM_000618.3,NM_001039547.1,NM_001652.3,NM_024637.4,NM_025188.2,NM_130446…
ACCCAGGCUGGAGUGCAGUGGCA	4.32	1.23	3.5122	NM_020957.1,NM_182612.2,NM_001039590.2,NM_001039591.2,NM_021075.3,NM_001001503.1,NM_001561.4,NM_182609.2,NM_001012659.1,NM_024620.3,NM_015127.3,NM_001048210.1,NM_032797.4,NM_001570.3,NM_012287.4,NM_001007561.2,NM_001010891.3,NM_145309.1,NM_152906.4,NM_007350.3,NM_032828.2,NM_198229.2,NM_002926.3,NM_001040665.1,NM_152999.3,NM_173531.3,NM_003417.3,NM_144972.3,NM_152426.3,NM_181868.1,NM_181869.1,NM_…
UGACUAUGACGGCAAACUGAGCAA	5.26	1.72	3.05814	NM_000918.3
AGGCUGGAGUGCAGUGGCG	12.59	4.41	2.85488	NM_003563.3,NM_020746.3,NM_139057.2,NM_017644.3,NM_020714.1,NM_175883.1,NM_006774.4,NM_001079512.2,NM_004308.2,NM_181868.1,NM_181869.1,NM_181861.1,NM_001160.2,NM_013229.2,NM_016206.2,NM_001135036.1,NM_025115.2,NM_004285.3,NM_030774.2,NM_182487.2,NM_020119.3,NM_007054.5,NM_017853.1,NM_005763.3,NM_003190.3,NM_001029955.3,NM_005433.3,NM_018138.3,NM_001134415.1,NM_181846.1,NM_001130137.1,NM_001130138…
CCAACUGGGACGACAUGGAG	2.07	0.74	2.7973	NM_001614.2,NM_005159.4,NM_001101.3
ACCACUAAGGACUAAAAAUGGCA	1.88	0.74	2.54054	NM_001621.3
CAAAUAAGGACAGCAGCUGGUG	1.88	0.74	2.54054	NM_003486.5
UCUCUCGGACAAGCUGUAGGU	5.26	2.7	1.94815	NM_020119.3
AACAGACGGGCUCUGAUGACGAAGAUG	1.88	0.98	1.91837	NM_002539.1
AAGGCAGAGGUUGUAGUG	1.88	0.98	1.91837	NM_152878.1,NM_012323.2
CUGUACGACGAGCUCAAGAAGGUG	1.88	0.98	1.91837	NM_001636.2
AUCUGGAGUCUGAAGUAGCUAU	3.19	1.72	1.85465	NM_030939.3
AGGCUGGAGUGCAGUGGCA	13.9	7.84	1.77296	NM_001012659.1,NM_022463.3,NM_012405.3,NM_024620.3,NM_000843.3,NM_015127.3,NM_001048210.1,NM_004153.2,NM_001816.2,NM_032831.2,NM_001126340.1,NM_024963.4,NM_032797.4,NM_000243.2,NM_001127665.1,NM_024636.2,NM_001085400.1,NM_000554.4,NM_201555.1,NM_001570.3,NM_018373.2,NM_012287.4,NM_152437.1,NM_178844.2,NM_133279.2,NM_001007561.2,NM_007181.4,NM_017877.3,NM_003190.3,NM_001010891.3,NM_145309.1,NM_152…
CCAUCUAUGAAGAACUGAAAGACCGCAG	2.07	1.23	1.68293	NM_018976.3
AGCUGGGACUACAGGCGC	2.25	1.47	1.53061	NM_001127322.1,NM_012117.2,NM_145343.1,NM_003661.2,NM_024784.2,NM_001816.2,NM_207352.3,NM_181846.1,NM_001111298.1,NM_173672.3,NM_020746.3,NM_002618.3,NM_014005.3,NM_032521.2,NM_002644.2,NM_001010982.3,NM_020894.2,NM_001130137.1,NM_001130138.1,NM_020851.2,NM_001130136.1,NM_003309.2,NM_014563.4,NM_001011658.2,NM_018212.4,NM_001008493.1,NM_006413.4,NM_001128855.1,NM_032620.2,NM_133644.2,NM_000245.2,…
CCCCGGCGGCGGGGGCA	48.29	32.11	1.50389	NM_004472.2
UAUGAUAGUAGAAGAAG	4.51	3.43	1.31487	NM_020785.1,NM_001080522.2
AAUUACAGAUUGUCUCAGAGAAA	1.88	1.47	1.27891	NM_020119.3
UCUGGAGUCUGAAGUAGCUAU	1.88	1.47	1.27891	NM_030939.3
UCUCGGACAAGCUGUAGGU	9.77	8.82	1.10771	NM_020119.3
UUGGGGAAACGGCCGCUGAGUG	5.26	4.9	1.07347	NM_018017.2
AGGAAGAUAGGAAGUUG	136.04	135.06	1.00726	NM_006422.2
UCUCUCGGCUCCUCGCGGCUCG	2.25	2.45	0.918367	NM_004252.2
GGAGAAGCAGCUCAGCU	3.57	3.92	0.910714	NM_015059.2
CAGGAAGUGGAUCAGG	2.44	2.7	0.903704	NM_001203.2
UUGGGGAAACGGCCGCUGAGUGA	12.03	13.48	0.892433	NM_018017.2
AGGCUGAAGAGGACGC	9.21	10.3	0.894175	NM_021204.3
CGACUGGACAAGCUGAGGA	2.63	3.19	0.824451	NM_001404.4
GAGGCUGAAGAGGACG	12.59	15.44	0.815415	NM_002707.3,NM_177983.1
AAGGAAGAUAUGGAAGA	3.19	3.92	0.813776	NM_177423.1,NM_003625.2,NM_003626.2
UAAGAUCCAAGAAGAAC	7.7	9.81	0.784913	NM_015668.3
UGGAGAGAAAGGCAUUU	4.32	5.64	0.765957	NM_014021.2
UUGGGGAAACGGCCGCUGAGUGAG	8.64	11.77	0.73407	NM_018017.2
AAAGCAAAUGUUGGGUGAACGG	3.38	4.66	0.725322	NM_002568.3
AAUUACAGAUUGUCUCAGAGAA	3.38	4.66	0.725322	NM_020119.3
AAUUUGAAGAUGAAACU	1.88	2.7	0.696296	NM_003855.2
CGACUGGACAAGCUGAGG	1.69	2.45	0.689796	NM_001404.4
AAAGCAAAUGUUGGGUGAACGGC	7.89	12.5	0.6312	NM_002568.3
AACCUGGACGGUGAAGUGAUUGG	1.5	2.45	0.612245	NM_002775.4
AAGCUGCAGAACCAACGAGGUG	1.5	2.45	0.612245	NM_002032.2
CGACUGGACAAGCUGAGGAAG	2.63	4.41	0.596372	NM_001404.4
ACAUUAAGGAGAAGCUGUG	1.88	3.19	0.589342	NM_001101.3
AUGAAGCUGCAGAACCAACGAGGUG	1.5	2.7	0.555556	NM_002032.2
AAAGCAAAUGUUGGGUGAACGGCU	7.14	13.73	0.520029	NM_002568.3
AAUUUUUAAUUGAUGUU	1.88	3.68	0.51087	NM_021127.2
UCUCAAUGGACGGGAAAUGUGUG	1.5	3.19	0.470219	NM_016441.1
CUCCCUGGAGAAGAGCUACGAGCUG	1.69	3.68	0.459239	NM_001101.3
AAGCAAUGGAAAGUGGA	10.15	22.55	0.450111	NM_001734.2,NM_201442.1
UUCUCACUACUGCACUUGACUAGUCUUA	3.76	8.33	0.451381	NM_017705.3,NM_001104554.1
AACGUGAUCCGGGACGCCGUG	1.32	2.94	0.44898	NM_021968.3,NM_003495.2,NM_003544.2,NM_003541.2
AUGUAGAUUCUCUGGUCAUUGAGCAU	1.32	2.94	0.44898	NM_001093734.1,NM_001089592.1,NM_001093733.2,NM_000985.3,NM_001035006.1
CGACUGGACAAGCUGAGGAA	1.69	3.92	0.431122	NM_001404.4
ACGGAAACAGGCCGAGAAGAACGUGG	2.07	4.9	0.422449	NM_012423.2
GAAGCUGCAGAACCAACGAGGUG	1.13	2.7	0.418519	NM_002032.2
AAUCUGGCUUGGCGGAAUAU	1.5	3.68	0.407609	NM_002032.2
CGGAAACAGGCCGAGAAGAACGUG	2.63	6.62	0.397281	NM_012423.2
ACGGAAACAGGCCGAGAAGAACGUG	6.01	15.93	0.377276	NM_012423.2
GAAGCUGCAGAACCAACGAGGUGG	4.89	13.24	0.369335	NM_002032.2
AAUUACAGAUUGUCUCAGAGA	2.44	6.62	0.36858	NM_020119.3
UCAGGAAGUGGAUCAGG	16.91	46.33	0.36499	NM_001203.2
CAUGAGAAGGAAAAAUG	1.32	3.68	0.358696	NM_014813.1
AAAUUGAAGUUGGUGGUGGUCGGA	1.13	3.19	0.354232	NM_001011.3
ACAGAAGAACAAACAGAG	1.13	3.19	0.354232	NM_003927.3,NM_015832.3
GUGGGUGGCUUUUUUU	2.25	6.37	0.353218	NM_025099.4
AAGCUGCAGAACCAACGAGGUGGCCGA	0.94	2.7	0.348148	NM_002032.2
UCAACAUGGAAGACCAAGAGCGCAU	0.94	2.7	0.348148	NM_002229.2
AAGCUGCAGAACCAACGAGGUGGCCG	1.69	4.9	0.344898	NM_002032.2
AAGCUGCAGAACCAACGAGGUGGCC	1.32	3.92	0.336735	NM_002032.2
UCUCUCGGCUCCUCGCGGCU	1.32	3.92	0.336735	NM_004252.2
CCAAGAGCUCAUGCAGA	1.88	5.88	0.319728	NM_002367.2
AACUGAAAGCUGAGCGUGAACGUGGUA	0.94	2.94	0.319728	NM_001402.5
ACUGAAAGCUGAGCGUGAACGUGGUAU	0.94	2.94	0.319728	NM_001402.5
CAUGAUGGCUGGUAUCGAUGACUG	0.75	2.45	0.306122	NM_002952.3
AAAUGUAGAAGAUCGCUCGGG	1.32	4.41	0.29932	NM_018183.2
AAAACCAUCUGGACGCAGGGA	0.94	3.19	0.294671	NM_014177.2
CAAGGAGAUGAAGCUGA	0.94	3.19	0.294671	NM_145117.4,NM_182964.5,NM_001111018.1,NM_001111019.1
CUGAGGAAGAUGAUGAC	5.07	18.38	0.275843	NM_004398.2
AUGAAGCUGCAGAACCAACGAGGUGG	4.51	16.42	0.274665	NM_002032.2
AAGAAAUAGAAGAAGCU	2.07	7.6	0.272368	NM_001001548.2
CUAUCUGGAGAUUUCGACGUG	1.32	5.15	0.256311	NM_001000.2
AAACAAGCUGAAGAAGAA	0.75	2.94	0.255102	NM_144982.4
CAAGAAGAAGGUGGAGC	7.33	29.42	0.24915	NM_032444.2
AAAGAGGAGGAAGACCA	5.07	20.59	0.246236	NM_001429.3
AGGAAGACCAACUGCAU	3.95	16.18	0.244129	NM_014607.3
AGGCUGGAGUGCAGUGGCAU	1.13	4.66	0.242489	NM_001039547.1,NM_001003811.1,NM_001652.3,NM_024637.4,NM_025188.2,NM_130446.2,NM_032116.3,NM_001014380.1,NM_133480.1,NM_001126049.1,NM_022896.1,NM_207344.3,NM_033303.3,NM_001039709.1,NM_005093.3,NM_001032999.2,NM_020949.2,NM_001097638.2,NM_000511.5,NM_014352.2,NM_183237.1,NM_014245.3,NM_173803.3,NM_001128423.1,NM_173667.2,NM_181868.1,NM_181869.1,NM_181861.1,NM_001160.2,NM_013229.2,NM_133496.3,NM_…
AAGCUGCAGAACCAACGAGGUGG	5.45	22.55	0.241685	NM_002032.2
CCCGGCGGGCGCCGGCG	2.25	9.56	0.235356	NM_017849.1
AAUCUGGCUUGGCGGAAUA	0.75	3.19	0.23511	NM_002032.2
GCUGGAAUAUCUGACGGCCGAG	0.75	3.19	0.23511	NM_021052.2
CGGGGCCCCGGCGGCGG	1.13	4.9	0.230612	NM_004558.3
AAAAAAGAAGAAGGUGGA	0.56	2.45	0.228571	NM_003757.2
AAAGGAAGAAGAAACUAA	0.56	2.45	0.228571	NM_024894.2
AAAUGAAAAAGUUUGUAGAAUGGCU	0.56	2.45	0.228571	NM_014670.2
AAGAAAUGUUGCUUGAAG	0.56	2.45	0.228571	NM_212469.1,NM_001277.2
AAUUGCUUAUGUGGAGUUCGUCGAU	0.56	2.45	0.228571	NM_004902.2,NM_184234.1
ACAUGAGAAGGAAAAAUG	1.5	6.62	0.226586	NM_014813.1
AACCGUCGUGUGAGUGUGGUAUG	1.32	5.88	0.22449	NM_005627.3
AAAUGUACAGUUGUCGAAGUGGAGA	0.94	4.41	0.213152	NM_020119.3
AAUGUAGACAAUGCAAA	0.56	2.7	0.207407	NM_015092.3
CAAGAGCUCAUGCAGAU	2.07	10.05	0.20597	NM_198467.2
AAUUCAUCACAUCAAGA	0.94	4.66	0.201717	NM_015289.2
UCUUACAAAGGAACUGU	0.94	4.9	0.191837	NM_018482.2
UCAGGACAAGCUGGAGC	4.51	23.53	0.19167	NM_178034.3
UCAACUUCAGAAGCUCUU	1.69	8.82	0.19161	NM_031463.3
AAGCUAAAGGAAGAGAA	0.75	3.92	0.191327	NM_020962.1
CAACUUCAGAAGCUCUU	3.38	18.63	0.181428	NM_031463.3
UGAAGCUGCAGAACCAACGAGGUGG	0.75	4.17	0.179856	NM_002032.2
AGGCUGGAGUGCAGUGGCGU	0.56	3.19	0.175549	NM_012164.3,NM_015110.3,NM_001135036.1,NM_005895.3,NM_001415.3,NM_015962.4,NM_145283.1,NM_012409.2,NM_001010982.3,NM_001008528.1,NM_019067.4,NM_001127321.1,NM_001127322.1,NM_012117.2,NM_000525.3,NM_007236.4,NM_000148.3,NM_021238.1,NM_001037330.1,NM_006878.2,NM_002392.2,NM_006881.2,NM_006879.2,NM_006882.2,NM_018958.2,NM_004895.4,NM_001127461.2,NM_001127462.2,NM_183395.2,NM_022151.4,NM_080876.2,NM_…
AGUAGUAAAAGACUGGUUAAUGAUA	0.56	3.19	0.175549	NM_001402.5
AGGCUGGAGUGCAGUGGCAC	0.94	5.64	0.166667	NM_001570.3,NM_018373.2,NM_012287.4,NM_152437.1,NM_178844.2,NM_133279.2,NM_001007561.2,NM_007181.4,NM_017877.3,NM_003190.3,NM_001010891.3,NM_145309.1,NM_152906.4,NM_020826.2,NM_014947.3,NM_173827.2,NM_017638.2,NM_001127350.1,NM_007350.3,NM_032828.2,NM_198229.2,NM_002926.3,NM_198468.2,NM_001040665.1,NM_152999.3,NM_000990.4,NM_018073.5,NM_002285.2,NM_001025108.1,NM_173531.3,NM_145273.2,NM_003417.3,…
AUAAAGAAGCUCGAGCAUU	0.94	5.64	0.166667	NM_001079802.1,NM_006731.2
UGGAUUCUGAAAACUAACUGGCA	0.94	5.64	0.166667	NM_152350.2
AAGAGGAGGAAGACCAA	2.82	17.16	0.164336	NM_004083.4
AAACUUAGUGAUGGACAA	0.56	3.43	0.163265	NM_001813.2
CGAUGACUGCUACACCUCAGCCCGGGG	0.56	3.43	0.163265	NM_002952.3
AAAUGGUGGGAACGAA	0.38	2.45	0.155102	NM_006311.2
GCGGGGCCCCGGCGGCGG	0.38	2.45	0.155102	NM_004558.3
UUUUGACAAUGAUGAUC	0.38	2.45	0.155102	NM_022902.2
AUUGCAGUUGGAAGAGUU	1.32	8.58	0.153846	NM_014377.1,NM_001129887.1
AACGGGAAGCUCACUGGCAUGGCCUU	0.56	3.68	0.152174	NM_002046.3
GAGAGGACCGGAGUGGA	3.19	21.82	0.146196	NM_000684.2
UAAAAAGACAAGAAGAA	0.75	5.15	0.145631	NM_153687.2
AAAGAAGUAGAAGAAAAC	0.56	3.92	0.142857	NM_020765.2
CCACUAUCUGGAGAUUUCGACGUG	0.38	2.7	0.140741	NM_001000.2
UAACUGAUGAUAUGGUU	1.5	11.28	0.132979	NM_172071.2
AGGUGAAGUAGCAGCU	0.94	7.11	0.132208	NM_007124.2
UGGAAACAGCAGAUGGU	0.94	7.11	0.132208	NM_206889.1,NM_206890.1,NM_206891.1,NM_015151.2
AAACACGUGGAGAUGGA	1.13	8.58	0.131702	NM_000875.3
AAACUUCAGAACUAGUU	1.5	11.52	0.130208	NM_016297.3
AUGAAUUUGAAGAUGAAA	2.44	18.87	0.129306	NM_014846.3
AACAGUAAGACCGAGGACCAGCGCAA	0.38	2.94	0.129252	NM_000516.4,NM_001077489.1,NM_080426.2,NM_001077488.1
AGAAGCUGCUGAAAACA	0.38	2.94	0.129252	NM_173497.2,NM_182765.3
CAACAGGUGAAGGAUGU	0.38	2.94	0.129252	NM_020866.1
GAAGCUGCAGAACCAACGAGGUGGCCG	0.38	2.94	0.129252	NM_002032.2
AGGGCUACGAGCGUCUCCUGAAGAUG	2.07	16.18	0.127936	NM_000146.3
AGAGAACUCCAGUUGCU	0.75	6.13	0.122349	NM_001128921.1,NM_001128919.1,NM_002376.5,NM_001128920.1,NM_001128918.1
GGCUGGUCCGAGGGCAGU	0.56	4.9	0.114286	NM_052866.3,NM_001040272.4
CAGCAGAUGGUAGAAAAG	0.75	6.62	0.113293	NM_144767.3,NM_007200.3,NM_006738.4
CAAUUCCCUACUGAAGACUGGAG	2.07	18.38	0.112622	NM_002295.4,NM_001012321.1
AACAAGGCAGAAAGUAGACGACG	0.38	3.43	0.110787	NM_003590.2
GAGGACCUGGACUUCAA	0.38	3.43	0.110787	NM_032221.3
UCACUACUGGAACUGCACAAACUGGC	0.38	3.43	0.110787	NM_002032.2
UAGGAUUUGAUGAGUUGG	0.56	5.15	0.108738	NM_017631.4
AGAGACUAUAAAAUUGG	16.54	152.71	0.10831	NM_003117.3,NM_153189.1
AAAGUGAAAGAGUUUCU	0.94	8.82	0.106576	NM_001135187.1,NM_004504.4,NM_001135188.1,NM_001135189.1
AAGUAGUUUGGGUGGAAGA	0.38	3.92	0.0969388	NM_001122665.1,NM_001356.3,NM_004660.3
AGGAAAUGGUUCAUCUU	0.38	3.92	0.0969388	NM_031435.2
AGGAUUUGAUGAGUUGG	0.38	3.92	0.0969388	NM_017631.4
UUAGGAUUUGAUGAGUUGG	2.07	23.29	0.0888793	NM_017631.4
AGGCUGGAGUGCAGUGGCGC	0.75	8.58	0.0874126	NM_001130923.1,NM_001130922.1,NM_001130919.1,NM_003333.3,NM_001033930.1,NM_020951.3,NM_003921.3,NM_006282.2,NM_000551.2,NM_198156.1,NM_021615.4,NM_022817.2,NM_201277.1,NM_004368.2,NM_001039802.1,NM_147781.2,NM_147783.2,NM_147780.2,NM_001908.3,NM_147782.2,NM_144567.3,NM_152410.2,NM_021155.2,NM_000761.3,NM_019119.3,NM_001126337.1,NM_020127.2,NM_182612.2,NM_020696.3,NM_014240.2,NM_001007226.1,NM_003…
CUCAUGAUGGCUGGUAUCGAUGAC	0.38	4.41	0.0861678	NM_002952.3
AAAGCAAUGGAAAGUGGA	0.94	11.03	0.0852221	NM_201442.1,NM_001734.2
AGGACCAUCACAUGCU	2.07	24.51	0.0844553	NM_018657.3
AACUGAAUUUAGAGGAC	0.94	11.28	0.0833333	NM_152321.1
AAAGUUAUUUAUGAUUC	1.32	15.93	0.0828625	NM_002247.2
CAAUCUGAAUUUUCAAGU	0.38	4.66	0.0815451	NM_152945.2
AAAGGUUUUGUUGCUGA	0.56	7.11	0.0787623	NM_003941.2
CGCGCCGGGCCCGGGUC	3.01	38.24	0.0787134	NM_001123364.1
AAAUAUUAGAAUGGCCG	0.75	9.56	0.0784519	NM_001122665.1,NM_004660.3
AAAGAAAAAGAAGCACAA	0.19	2.45	0.077551	NM_032329.4,NM_001002909.1
AGCAAAAAGAUUGUGUGUAUGUAUG	0.19	2.45	0.077551	NM_003107.2
CAAUGGAACAGGAUUAA	0.19	2.45	0.077551	NM_003319.3,NM_133378.3,NM_133437.2,NM_133432.2
UCUGCUGGAAGUUAUCG	0.19	2.45	0.077551	NM_001011655.1,NM_138399.3
UUGCAGUUGGAAGAGUU	3.01	40.45	0.0744129	NM_014377.1,NM_001129887.1
CACAGCCAUGGAUGUAGUAUAUG	0.38	5.15	0.0737864	NM_003542.3
GAAUUUAACGUUGGAAA	0.38	5.39	0.0705009	NM_001012967.1
AAGCAAUGGAAGUAGAU	0.19	2.7	0.0703704	NM_001099666.1
CAACUGUGAUGAGCCUAUGUAUGUC	0.19	2.7	0.0703704	NM_001016.3
GCGGAAUAUCUCUUUGACAAGCAC	0.19	2.7	0.0703704	NM_002032.2
UCUGCUGGUGGAUUUAC	0.19	2.7	0.0703704	NM_031461.4
UCUGGUUUACCUGCUAG	0.19	2.7	0.0703704	NM_005610.2,NM_001135255.1,NM_001135256.1
UUUGAAUAGAAAUUUUU	0.19	2.7	0.0703704	NM_020128.2
CUCAUGAUGGCUGGUAUCGAUGACUG	1.69	24.27	0.0696333	NM_002952.3
CAAUUCCCUACUGAAGACUGGAGCG	0.56	8.58	0.0652681	NM_001012321.1,NM_002295.4
GCGCGCCGGGCCCGGGUC	0.56	8.58	0.0652681	NM_001123364.1
AAGAGAACCAAAGAAUG	0.38	5.88	0.0646259	NM_023070.1
AGAAGGAUGGCAAGAAGCGUA	0.38	5.88	0.0646259	NM_003524.2
CUCAUGAUGGCUGGUAUCGAUGACU	0.38	5.88	0.0646259	NM_002952.3
AAAAGUUCUGAAGAUGAUG	0.19	2.94	0.0646259	NM_001144.4
CAAAAAGGUUGGAGCAGAAAGA	0.19	2.94	0.0646259	NM_006597.3,NM_153201.1
CUCAUGAUGGCUGGUAUCGAUGA	0.19	2.94	0.0646259	NM_002952.3
UUGGGUUGAAAAUUUGGA	1.69	26.96	0.0626855	NM_148959.3
AAUUCCCUACUGAAGACUG	0.56	9.07	0.061742	NM_002295.4,NM_001012321.1
AUGUAGAUUCUCUGGUCAUUGAGCAUA	1.69	31.87	0.0530279	NM_001035006.1,NM_001093734.1,NM_001089592.1,NM_001093733.2,NM_000985.3
GCCCCGCGGCGGGGCGCG	0.56	10.79	0.0518999	NM_170751.1,NM_170752.1
AUGGACCAUCACAGACA	0.38	7.35	0.0517007	NM_024690.2
AAAACAAACCAGUAGAU	0.19	3.68	0.0516304	NM_007167.3
AGAUGAAGAGGAGGAGGAUGUG	0.19	3.68	0.0516304	NM_001037738.1,NM_002520.5,NM_199185.2
AUGCUGUUGUUGCUGUG	0.19	3.68	0.0516304	NM_001676.4
CAGUUAAAGGAUUUAGU	1.5	29.66	0.0505732	NM_015113.3
AAAUAUUCAGAGACUUU	0.19	3.92	0.0484694	NM_002241.3
UGAGCUUUCGAAUAUGA	0.19	3.92	0.0484694	NM_138450.4
UUUGUGUUUGAUUUUGUU	0.19	3.92	0.0484694	NM_012395.2
AAAAAGAAGAAGGUGGA	0.19	4.17	0.0455635	NM_003757.2
UCUGAUUCUUUCUGACGAUCA	0.19	4.17	0.0455635	NM_032354.3,NM_183065.2
AAAAUGGUAGAUGACGG	0.19	4.41	0.0430839	NM_031456.3,NM_006382.3
AAUGAAUUUGAAGAUGAAA	0.75	17.65	0.0424929	NM_014846.3
GCCGAGUGGAGACUGGUG	0.19	4.66	0.0407725	NM_001402.5
ACCGUGACCGUUUGCUAUAUU	0.19	4.9	0.0387755	NM_005953.3
AAUUCCCUACUGAAGACUGGAG	0.19	5.39	0.0352505	NM_002295.4,NM_001012321.1
CAAUUCCCUACUGAAGACUGG	0.56	16.42	0.0341048	NM_002295.4,NM_001012321.1
AAAUAGUGAAGAUGGAGUAGAAUGCA	0.38	12.99	0.0292533	NM_001030055.1,NM_001173.2
CAAUUCCCUACUGAAGACUG	0.56	20.1	0.0278607	NM_001012321.1,NM_002295.4
AAAUAAAUGGUCAAUAC	0.19	6.86	0.0276968	NM_006322.4
AGCAGGCAACAGUGUGGGAUA	0.19	6.86	0.0276968	NM_015898.2
CGGCGGCGGCGGGACCG	0.75	29.42	0.0254929	NM_002648.3
CAGAGUGUACUUAACACAAA	0.38	22.06	0.0172257	NM_014911.3
CAAUUCCCUACUGAAGACUGGA	0.19	13.97	0.0136006	NM_001012321.1,NM_002295.4
CACAGCCAUGGAUGUAGUAUAUGCC	0.19	15.44	0.0123057	NM_003542.3
UGGACCAUCACAGACA	0	25.98	0	NM_024690.2
GCGGCGGCGGCGGGACCG	0	10.05	0	NM_002648.3
AACAAGGCAGAUGUAUGAUAUGGUG	0	6.62	0	NM_014319.3
AAUUAAAAUAUGGCAUUGUAUAACA	0	6.13	0	NM_014331.3
AAAAGUAAAAAACAUAGAACAUGGCA	0	5.15	0	NM_003750.2
AAUAGAAUGGGCAUGUAUUGUA	0	4.9	0	NM_001079673.1,NM_014923.3
UGUAGAUUCUCUGGUCAUUGAGCAUA	0	4.9	0	NM_001035006.1,NM_001093734.1,NM_001089592.1,NM_001093733.2,NM_000985.3
AACAAAAACUGGAUGAAAGAGUAUGCA	0	4.66	0	NM_001079673.1,NM_014923.3
AAAGGACAUACAUGAAGA	0	4.41	0	NM_014366.4,NM_206826.1,NM_206825.1
CAAAAAGCAGAACAAGAA	0	4.41	0	NM_016625.2
ACUUUUUCUCUUACCACA	0	3.92	0	NM_016486.3
GGGGGUGUGGCUCAGUGG	0	3.68	0	NM_178128.3
UUCGCCUCACCUGGAGC	0	3.43	0	NM_021005.2
AACAAAAGAACUAUGCAUAAGUAUG	0	3.19	0	NM_006620.3
ACUCUUUUUGGUAUAAA	0	3.19	0	NM_138704.2
AGAAUAAAGAUGUUAGAGUAUGCA	0	3.19	0	NM_001083893.1,NM_014574.3
AGCAGAAGUGGAAUUGGAUAUGUUG	0	3.19	0	NM_020718.3
CUUUGCUAAUGGUGGAG	0	3.19	0	NM_022568.2,NM_170771.1
AAACAAGGCAGAUGUAUGAUAUGGUG	0	2.94	0	NM_014319.3
AACUGGCUGAGCACAUAGAGCAUG	0	2.94	0	NM_000267.2,NM_001042492.1
AGUAGAUAUCUCUGCCAACAUGAGG	0	2.94	0	NM_000992.2
AAAACUUUGGACAAAUAGAGUAUGGU	0	2.7	0	NM_018304.2
AAACUUUGGACAAAUAGAGUAUGGU	0	2.7	0	NM_018304.2
ACAUUAAGGAGAAGCUGUGCUA	0	2.7	0	NM_001101.3
UAAGUCUUGAUCUGUUU	0	2.7	0	NM_001080415.1
UGGGACCGCGUGGGAGCCGC	0	2.7	0	NM_001004354.1
AAAAGGAAUCGUAUCGUAUG	0	2.45	0	NM_005801.3
AAACAGCUUAAAGUAGAGGAACA	0	2.45	0	NM_018237.2
AACAGGACAUUUGGAUGGAGUAUUUA	0	2.45	0	NM_015028.1
AAUUCCCUACUGAAGACUGG	0	2.45	0	NM_002295.4,NM_001012321.1
ACAGCCAUGGAUGUAGUAUAUGCC	0	2.45	0	NM_003542.3
AUAUGGCAAUGAGUAGAGCAUG	0	2.45	0	NM_022151.4
GGGACCGCGUGGGAGCCGC	0	2.45	0	NM_001004354.1

## Sheet: rRNA
Sequence	Nuclear	Cytoplsamic	N/C	Gene
GGGCGGACUGUCCCCAGUGCG	61.63	0	N.A.	28S
AGGAAACUCUGGUGGAGGUCCGUAGCGGU	60.51	0	N.A.	28S
AGGAAACUCUGGUGGAGGUCCGUAGCGGUC	35.33	0	N.A.	28S
CGCGCGCGUGUGGUGUGCGUCGG	21.42	0	N.A.	28S
GGCGGACUGUCCCCAGUGCG	14.84	0	N.A.	28S
GACUCUUAGCGGUGGAUCACUCGGCUCGU	14.66	0	N.A.	5.8S
AACAGCAGUUGAACAUGGGUCAGUCGGUC	9.96	0	N.A.	28S
UCGCGCGCGCGUCCGCUGGGGGCGG	8.83	0	N.A.	28S
CGGUGGAUCACUCGGCUCGUGCGUCGAUG	7.89	0	N.A.	5.8S
CGGCCCGGCGGAUCUUUCCCGCCCC	7.7	0	N.A.	28S
GGAAACUCUGGUGGAGGUCCGUAGCGGU	7.7	0	N.A.	28S
GACCCGAAAGAUGGUGAACUAUGC	7.14	0	N.A.	28S
CGCGCGUGUGGUGUGCGUCGGAGG	6.58	0	N.A.	28S
GGAAACUCUGGUGGAGGUCCGUAGCGGUC	6.39	0	N.A.	28S
CAUGAAUGGAUGAACGAG	6.2	0	N.A.	28S
CGCAUGAAUGGAUGAACGA	5.83	0	N.A.	28S
CGGCGGGUGUUGACGCGAU	5.83	0	N.A.	28S
CGAAGCGGGGCUGGGCGCGCGCCGCGG	5.64	0	N.A.	28S
GGCGCGAAGCGGGGCUGGG	5.64	0	N.A.	28S
ACCCGAAAGAUGGUGAACUAUGC	5.45	0	N.A.	28S
CUGGACGAGGCGCCGCCGCCCCCC	5.26	0	N.A.	28S
CGCGCGUGUGGUGUGCGUCGG	5.07	0	N.A.	28S
CGGCAGGGGCCGGCGGCG	5.07	0	N.A.	28S
UCGCUUCUGGCGCCAAGCGCCCGGCCG	5.07	0	N.A.	28S
GGGAUGCGUGCAUUUAUCAGAUCA	4.89	0	N.A.	18S
UGGUAGUAGCAAAUAUUCA	4.89	0	N.A.	28S
GCGGCGGCGACUCUGGACGCGAGC	4.7	0	N.A.	28S
GCGGCUGGACGAGGCGCCG	4.7	0	N.A.	28S
UCGUAGACGACCUGCUUC	4.7	0	N.A.	28S
CAUGAAUGGAUGAACGAGA	4.51	0	N.A.	28S
GCGCAUGAAUGGAUGAACGA	4.51	0	N.A.	28S
UAGCGGUGGAUCACUCGGCUCGUGCGUCGA	4.51	0	N.A.	5.8S
CGAAUGAUUAGAGGUCUUGGG	4.32	0	N.A.	28S
GCGCGAAGCGGGGCUG	4.13	0	N.A.	28S
GCUGGGCGCGCGCCGCGGCUGGACGAGG	4.13	0	N.A.	28S
UCGCGCGCGCGUCCGCUGGGGGCGGG	4.13	0	N.A.	28S
AUGAACGAGGAAUUCCCAGUAAGUGCGG	3.95	0	N.A.	18S
CUAAGGGCUGGGUCGGUCGGGCUG	3.95	0	N.A.	28S
ACUCUUAGCGGUGGAUCACUCGGCUCGUG	3.76	0	N.A.	5.8S
AGGAAACUCUGGUGGAGGUCCGUAGC	3.76	0	N.A.	28S
GCUGGGCGCGCGCCGCGGCUGGACGAGGCG	3.76	0	N.A.	28S
ACGGACAGGAUUGACAGAUUGAUAGC	3.57	0	N.A.	18S
AGAGGGGCCCGUGCCUUGGAAAGCGUCG	3.57	0	N.A.	28S
AGGUGUAGAAUAAGUGGGAGG	3.57	0	N.A.	28S
AUAACGAACGAGACUCUGGCAUGCUAA	3.57	0	N.A.	18S
CCACGUCUCGUCGCGCG	3.57	0	N.A.	28S
CUGGACGAGGCGCCGCCGC	3.57	0	N.A.	28S
AUGAGAGGUGUAGAAUAAGUGGGAGGCCC	3.38	0	N.A.	28S
CGACUCUUAGCGGUGGAUCACUCGGCUCGU	3.38	0	N.A.	5.8S
CGCAUGAAUGGAUGAACGAGA	3.38	0	N.A.	28S
CGCGCAUGAAUGGAUGAACGA	3.38	0	N.A.	28S
CGGCCCGGCGGAUCUUUCCCGCCC	3.38	0	N.A.	28S
CGCCGCGUGGGGGCGGCGGCGGGGG	3.19	0	N.A.	28S
CGGCCCGGCGGAUCUUUCCCG	3.01	0	N.A.	28S
CGGGACAUGUGGCGUAC	3.01	0	N.A.	28S
CGGUUCUAUUUUGUUGGUUUUCGGAA	3.01	0	N.A.	18S
GCGACUCUGGACGCGAGCCGGGCCCUUCCC	3.01	0	N.A.	28S
GCGGACUGUCCCCAGUGCG	3.01	0	N.A.	28S
GGCCGCCGGUGAAAUACCACUACUCUG	3.01	0	N.A.	28S
ACCCCACGUCUCGUCGCG	2.82	0	N.A.	28S
AGAGGUGUAGAAUAAGUGGGAGGCCCCCGG	2.82	0	N.A.	28S
AGGGGCCCGUGCCUUGGAAAGCGUCG	2.82	0	N.A.	28S
CGGGCGGGUCGCGCCGUCGGGCCCGGG	2.82	0	N.A.	28S
CUCGCUUCUGGCGCCAAGCGCCCGGCCG	2.82	0	N.A.	28S
CUCUGGACGCGAGCCGGGC	2.82	0	N.A.	28S
CUGGACGAGGCGCCGCCGCC	2.82	0	N.A.	28S
GCGGUGGAUCACUCGGCUCGUGCGUCGAU	2.82	0	N.A.	5.8S
GGCGGGGCGGACUGUCCCCAGUGCGCC	2.82	0	N.A.	28S
GGGUCAGUCGGUCCUGAGAGAUGGGCG	2.82	0	N.A.	28S
UCUCGUCGCGCGCGCGUCCGCUGGGGGCGG	2.82	0	N.A.	28S
AGGUGUAGAAUAAGUGGGAGGCCCCCGGCG	2.63	0	N.A.	28S
CCGGCGGCGGCGGCGACUCUGG	2.63	0	N.A.	28S
CCUUCCCGUGGAUCGCCCCAG	2.63	0	N.A.	28S
CGCGGGCCCGGGUGGAGCCGCCG	2.63	0	N.A.	28S
GCUGGACGAGGCGCCGC	2.63	0	N.A.	28S
GCUUGACUCUAGUCUGGCACGGUG	2.63	0	N.A.	28S
GUGCUCUGAAUGUCAAAGUGAAGAAAUU	2.63	0	N.A.	28S
UCUAGUCUGGCACGGUGAAGA	2.63	0	N.A.	28S
AAAGAAGACCCUGUUGAGCUUGACUC	2.44	0	N.A.	28S
AAUCCGGAGUGGCGGAGAUGGGCG	2.44	0	N.A.	28S
ACGGACAGGAUUGACAGAUUGAUAGCUC	2.44	0	N.A.	18S
AGAAGCCGGCGGGAGCCCCGGGGAGA	2.44	0	N.A.	28S
CGGCGGCGACUCUGGACGCGAG	2.44	0	N.A.	28S
CGGGAGGGCGCGUGCCCCGCCGCGCG	2.44	0	N.A.	28S
CUGGACGCGAGCCGGGCCCUUCCCGUGGAU	2.44	0	N.A.	28S
GCAUGAAUGGAUGAACGAGA	2.44	0	N.A.	28S
GCGCGCGCCGCGGCUGGACGAGGCG	2.44	0	N.A.	28S
GGAUAGCUGGCGCUCUCGCAGACCCGAC	2.44	0	N.A.	28S
UGUGGUGUGCGUCGGAGGGCGGCGG	2.44	0	N.A.	28S
AAACGAGAACUUUGAAGGCCGAAGUGGAG	2.25	0	N.A.	28S
AAAUGGAUGGCGCUGGAGCGUCGGGC	2.25	0	N.A.	28S
AACAGCAGUUGAACAUGGGUCAGUCGG	2.25	0	N.A.	28S
ACGCCCGGGGCACCCCCCUCGCG	2.25	0	N.A.	28S
CAAAUCGGUCGUCCGACCUGGGUA	2.25	0	N.A.	28S
CCACCCCACGUCUCGUCGCGCGCGCGUCCG	2.25	0	N.A.	28S
CGAAUGAUUAGAGGUCUUGGGGCC	2.25	0	N.A.	28S
CGGCUGGACGAGGCGCCGCCGC	2.25	0	N.A.	28S
CGGUUCCGGCGGCGUCCGGUGAGCUCUCG	2.25	0	N.A.	28S
CUCGGAUCGGCCCCGCCGGGG	2.25	0	N.A.	18S
GCGACUCUGGACGCGAGCCGGGCCCUUCC	2.25	0	N.A.	28S
GCGCAUGAAUGGAUGAACGAGAU	2.25	0	N.A.	28S
GGAACGGGCUUGGCGGAAUCAGCGG	2.25	0	N.A.	28S
GGUAAGCAGAACUGGCGCUGCGGGA	2.25	0	N.A.	28S
GGUGCCGCGCGCGGGUCGGG	2.25	0	N.A.	28S
GGUGUAGAAUAAGUGGGAGGCCC	2.25	0	N.A.	28S
UCGGGGUUUCGUACGUAGCAGAGCAGCUC	2.25	0	N.A.	28S
AGAAGCCGGCGGGAGCCCCGGGGAG	2.07	0	N.A.	28S
CAGCAGUUGAACAUGGGUCAGUCGG	2.07	0	N.A.	28S
CAGGGGCCGGCGGCGGCCCGC	2.07	0	N.A.	28S
CGAAACGAUCUCAACCUAUUCU	2.07	0	N.A.	28S
CGCGCGCCGCGGCUGGACGAGGCG	2.07	0	N.A.	28S
CGCGCGCGUGUGGUGUGCGUCGGAGGGCGG	2.07	0	N.A.	28S
CGCGUCCGCUGGGGGCGGGGAGCG	2.07	0	N.A.	28S
CGGCAGGGGCCGGCGGCGGC	2.07	0	N.A.	28S
CGGCCCGGCGGAUCUUUCC	2.07	0	N.A.	28S
GGGAGCGGUCGGGCGGCGGCG	2.07	0	N.A.	28S
GUCUUGAAACACGGACCAAGGAGU	2.07	0	N.A.	28S
GUGCCGCGCGCGGGUCGGGGGGCGGG	2.07	0	N.A.	28S
UCCUCCCUCGGGAGGGCGCGCGG	2.07	0	N.A.	28S
UCUUAGCGGUGGAUCACUCGGCUCGUGCG	2.07	0	N.A.	5.8S
ACACUUCGAACGCACUUGCGGCCCCGG	1.88	0	N.A.	5.8S
AGGUGUAGAAUAAGUGGGAG	1.88	0	N.A.	28S
AGGUUCUCUCGGGGCCACGCGCGCGUC	1.88	0	N.A.	28S
AUAAGGAUUGGCUCUAAGGGCUG	1.88	0	N.A.	28S
CCCGCGAGGGGCCCGGGGCGGG	1.88	0	N.A.	28S
CCGGCGGCGGCGGCGACUCUGGACGCGAGC	1.88	0	N.A.	28S
CGCCCGGGGCACCCCCCUCGCGG	1.88	0	N.A.	28S
CGCGCAUGAAUGGAUGAACGAG	1.88	0	N.A.	28S
CGGGUCGCGCCGUCGGGCCCGGGGGAG	1.88	0	N.A.	28S
CUGACGUGCAAAUCGGUCGUCCGACCUGG	1.88	0	N.A.	28S
GGCCGGCGGCGGCGGCGACUCUGGACGCGA	1.88	0	N.A.	28S
GGCGACUCUGGACGCGAGCCGGGCCCUUC	1.88	0	N.A.	28S
GGGUCAGUCGGUCCUGAGAGAUGGGCGAG	1.88	0	N.A.	28S
GGUGCCGCGCGCGGGUCGGGG	1.88	0	N.A.	28S
GUGGUAAUUCUAGAGCUAAUACAUGC	1.88	0	N.A.	18S
UGAUUAGAGGUCUUGGGG	1.88	0	N.A.	28S
CAUGAAUGGAUGAACGAGAU	39.27	0.49	80.1429	28S
GGCGCGGGACAUGUGGCGUACGGAAGA	18.04	0.25	72.16	28S
CGGCCCGGCGGAUCUUUCCCGCCCCC	30.63	0.49	62.5102	28S
GUCUCCCCCGCGGGGGCGCGCCGG	30.25	0.49	61.7347	28S
CGCCGCGUGGGGGCGG	25.18	0.49	51.3878	28S
CGGGACAUGUGGCGUACGGAA	80.42	1.96	41.0306	28S
GGUCAGUCGGUCCUGAGAGAUGGGCGAG	9.77	0.25	39.08	28S
CGGCGACUCUGGACGCGAGCCG	241.64	6.37	37.9341	28S
GUGAAUUGCAGGACACAUUGAU	17.48	0.49	35.6735	5.8S
GUGAAUUGCAGGACACAUUGA	8.46	0.25	33.84	5.8S
CGCGGGACAUGUGGCGUACGGAAGACCCG	16.54	0.49	33.7551	28S
CAAACGAGAACUUUGAAGGCCGAAGUGG	16.35	0.49	33.3673	28S
GCGGCGGCGACUCUGGACGCGAGCCG	90.01	2.7	33.337	28S
GGCGCGGGACAUGUGGCGUACGGAAG	16.16	0.49	32.9796	28S
AGGUGUAGAAUAAGUGGGAGGCC	23.86	0.74	32.2432	28S
CGUAGGUGAACCUGCGGAAGGAUCAUUA	14.47	0.49	29.5306	18S
UCGGGAGGGCGCGCGGGUCGGGG	21.61	0.74	29.2027	28S
GCGGCGACUCUGGACGCGAGCCG	550.56	18.87	29.1765	28S
ACAGCAGUUGAACAUGGGUCAGUCGGUC	28.56	0.98	29.1429	28S
CAAUGUAGGUAAGGGAAGUCGGCAAGCCGG	7.14	0.25	28.56	28S
UCUCCCCCGCGGGGGCGCGCCGG	46.6	1.72	27.093	28S
CGGUGGAUCACUCGGCUCGUGCGUCGA	892.17	33.34	26.7597	5.8S
CUCCCCCGCGGGGGCGCGCCGG	71.22	2.7	26.3778	28S
CACGUCUCGUCGCGCG	57.12	2.21	25.8462	28S
CGGGACAUGUGGCGUACGGAAG	543.79	21.08	25.7965	28S
CGGUGGAUCACUCGGC	6.39	0.25	25.56	5.8S
CUCCCCGGGGGAGCGCCGCGUGGGGGCG	6.39	0.25	25.56	28S
UGUGAAUUGCAGGACACAUUGAU	6.39	0.25	25.56	5.8S
CUGGGCGCGCGCCGCGGCUGGACGAG	6.2	0.25	24.8	28S
GCGCGGGACAUGUGGCGUACGGAAGACCC	6.2	0.25	24.8	28S
CGGCGGCGACUCUGGACGCGAGCCG	42.09	1.72	24.4709	28S
CGGCAGGGGCCGGCGGCGGCCCGCC	6.01	0.25	24.04	28S
CGGCGGCGACUCUGGACGCGAGCCGG	17.48	0.74	23.6216	28S
CGCUAAACCAUUCGUAGACGACCUGCUUC	5.83	0.25	23.32	28S
CGACUCUUAGCGGUGGAUCACUCGGCUCG	56.93	2.45	23.2367	5.8S
UCUUGAAACACGGACCAAGGAGU	5.64	0.25	22.56	28S
GCGGCGACUCUGGACGCGAGCC	69.15	3.19	21.6771	28S
GCAUGAAUGGAUGAACGAGAU	15.97	0.74	21.5811	28S
CAUUCGUAGACGACCUGCUUC	5.26	0.25	21.04	28S
GCGCGGGACAUGUGGCGUACGGAAG	229.62	11.03	20.8178	28S
AGGAAACUCUGGUGGAGGUCCGUAGCGG	15.22	0.74	20.5676	28S
ACGGACAGGAUUGACAGAUUGAUAG	5.07	0.25	20.28	18S
CCCACCCCACGUCUCGUCG	5.07	0.25	20.28	28S
CGCCGCGGCUGGACGAGGCGCCGC	5.07	0.25	20.28	28S
CGGCUGGACGAGGCGCCG	19.73	0.98	20.1327	28S
CGCGCGCCGCGGCUGGACGAGG	9.77	0.49	19.9388	28S
CGCGCGCGUGUGGUGUGCGUCGGAGGGCG	4.89	0.25	19.56	28S
GCGACUCUGGACGCGAGCCGGG	132.47	6.86	19.3105	28S
ACGGACAGGAUUGACAGAUUGAUAGCU	9.4	0.49	19.1837	18S
AGUCGAGAGUGGACGGGA	28.19	1.47	19.1769	28S
GGCGGCGACUCUGGACGCGAGCCG	18.6	0.98	18.9796	28S
CGCGCGCGUGUGGUGUGCGUCGGAGG	55.43	2.94	18.8537	28S
CGCCGCGGCUGGACGAGGCG	4.7	0.25	18.8	28S
CCCACCCCACGUCUCGUCGCGCG	9.02	0.49	18.4082	28S
CCUCCCCGGGGGAGCGCCGCGUGGGGGCGG	4.51	0.25	18.04	28S
GGCCGGCGGCGGCGGCGACUCUGG	4.51	0.25	18.04	28S
GCUGGGCGCGCGCCGCGGCUGGACGAG	8.83	0.49	18.0204	28S
AGGAAACUCUGGUGGAGGUCCGUAGCG	4.32	0.25	17.28	28S
UCCUCCCCGGAGGGGGCGGGCUCCGGCGG	8.46	0.49	17.2653	28S
GCGCGAAGCGGGGCUGG	12.4	0.74	16.7568	28S
CCCCACCCCACGUCUCGUCGCGCG	4.13	0.25	16.52	28S
CCCCGAAGAGGGGGACGGCG	4.13	0.25	16.52	28S
CUGGGCGCGCGCCGCGGCUGGACGAGG	4.13	0.25	16.52	28S
GCGGCGGCGACUCUGGACGCGAG	4.13	0.25	16.52	28S
GUUCUCUCGGGGCCACGCGCG	4.13	0.25	16.52	28S
CAGCAGUUGAACAUGGGUCAGUCGGUC	12.21	0.74	16.5	28S
GGGGCGGGCUCCGGCG	8.08	0.49	16.4898	28S
AGCGGUGGAUCACUCGGCUCGUGCGUCGA	19.54	1.23	15.8862	5.8S
CGCGCAUGAAUGGAUGAACGAGAU	3.95	0.25	15.8	28S
GUUCUCUCGGGGCCACGCGCGCGUC	3.95	0.25	15.8	28S
CGGCGGCGGCGACUCUGGACGCGAGCCG	11.65	0.74	15.7432	28S
CGGCAGGGGCCGGCGGC	7.7	0.49	15.7143	28S
CGGCGACUCUGGACGCGAG	7.7	0.49	15.7143	28S
GCGCGAAGCGGGGCUGGG	7.7	0.49	15.7143	28S
CGCGCGUGUGGUGUGCGUCGGAG	18.98	1.23	15.4309	28S
CACCCGGGGGGCCGGCG	3.76	0.25	15.04	28S
CUAAGGGCUGGGUCGGUCG	3.76	0.25	15.04	28S
GGAACGGGCUUGGCGGAAUCAGCGGGG	3.76	0.25	15.04	28S
GGGCGCGAAGCGGGGCUGG	3.76	0.25	15.04	28S
CGGCGACUCUGGACGCGAGCCGG	538.34	36.03	14.9414	28S
GCGCGGGACAUGUGGCGUACGGAAGA	332.97	22.31	14.9247	28S
CUCGGGAGGGCGCGCGGGUCGGGG	18.04	1.23	14.6667	28S
GUGUUAGGACCCGAAAGAUGGUGAA	14.09	0.98	14.3776	28S
GGCGCGGGACAUGUGGCGUACGGAAGAC	3.57	0.25	14.28	28S
UUAGUACUUGGAUGGGAGACCG	3.57	0.25	14.28	5S_rRNA
AACAGCAGUUGAACAUGGGUCAGUCGGU	6.95	0.49	14.1837	28S
GCAUGAAUGGAUGAACGA	6.95	0.49	14.1837	28S
CGCGCGCGUGUGGUGUGCGUCGGA	45.1	3.19	14.1379	28S
GCGGCGACUCUGGACGCGAG	47.92	3.43	13.9708	28S
GGAAACUCUGGUGGAGGUCCGUAGCGG	6.76	0.49	13.7959	28S
CACGUCUCGUCGCGCGC	29.88	2.21	13.5204	28S
AACGAAAGUCGGAGGUUCGAAGACGAUCAG	3.38	0.25	13.52	18S
CAAACGAGAACUUUGAAGGCCGAAGUG	3.38	0.25	13.52	28S
CGCGGGACAUGUGGCGUACGGAAG	85.31	6.37	13.3925	28S
CGGGACAUGUGGCGUACGGAAGA	415.08	31.13	13.3338	28S
CGGUGGAUCACUCGGCUCGUGCGUCG	77.79	5.88	13.2296	5.8S
ACAGCAGUUGAACAUGGGUCAGUCGGUCC	6.39	0.49	13.0408	28S
GCUAGCUGCGAGAAUUAAUGUG	9.58	0.74	12.9459	5.8S
CGCGCGCGUGUGGUGUGCGUCGGAG	104.47	8.09	12.9135	28S
CGACUCUGGACGCGAGCCGGG	91.7	7.11	12.8973	28S
CGGGACAUGUGGCGUACGGAAGACCCG	154.83	12.01	12.8918	28S
CGGCGACUCUGGACGCGAGCC	15.78	1.23	12.8293	28S
CUCCCCGGGGGAGCGCCGCGUGGGGGCGG	15.78	1.23	12.8293	28S
AGAGGUGUAGAAUAAGUGGGAGG	3.19	0.25	12.76	28S
CGCGCGCGCGCGUGUGGUGUGCGUCGGAG	3.19	0.25	12.76	28S
CUUUUUGAUCCUUCGAUGUCGGC	3.19	0.25	12.76	28S
GCGAAUGAUUAGAGGUCUUG	3.19	0.25	12.76	28S
GGCGACUCUGGACGCGAGCC	6.2	0.49	12.6531	28S
CUGGGCGCGCGCCGCGGCUGGACGAGGCG	9.21	0.74	12.4459	28S
CGGCGGGUGUUGACGCGAUG	54.87	4.41	12.4422	28S
CGGGACAUGUGGCGUACGGAAGACCCGC	90.38	7.35	12.2966	28S
CACCCGGGGGGCCGGCGGCG	18.04	1.47	12.2721	28S
CUAGGAAUAAUGGAAUAGGACCGCGGUU	6.01	0.49	12.2653	18S
CGGUGGAUCACUCGGCUCGUGCG	297.45	24.27	12.2559	5.8S
GCGCGGGACAUGUGGCGUACGGAAGACC	17.85	1.47	12.1429	28S
CCGAGGUGGGAUCCCGAGG	3.01	0.25	12.04	28S
GCGCAAGACGGACCAGAGCGAAAGC	3.01	0.25	12.04	18S
GGCGACUCUGGACGCGAGCCG	25.93	2.21	11.733	28S
CGCAUGAAUGGAUGAACGAGAU	8.64	0.74	11.6757	28S
GCGGCGACUCUGGACGCGAGCCGG	842.75	72.8	11.5762	28S
CGCGCGCGUGUGGUGUGCGUCGGAGGG	90.19	7.84	11.5038	28S
CGGGACAUGUGGCGUACGGA	11.27	0.98	11.5	28S
CACGCCCGGGGCACCCCCCUCG	2.82	0.25	11.28	28S
CCCGCGAGGGGCCCGGGGCG	2.82	0.25	11.28	28S
CGUGUGGUGUGCGUCGGAG	2.82	0.25	11.28	28S
GCAUGAAUGGAUGAACGAG	2.82	0.25	11.28	28S
GCCGACUUAGAACUGGUGCGGACCAGGGGA	2.82	0.25	11.28	28S
UCCGGAGUGGCGGAGAUGGGCGC	2.82	0.25	11.28	28S
UGCCGCGCGCGGGUCGGGG	2.82	0.25	11.28	28S
UGGGGGGCCCAAGUCCUUCUGAUCGAGGCC	2.82	0.25	11.28	28S
CGACUCUGGACGCGAGCCGG	49.23	4.41	11.1633	28S
CAGGAUAGCUGGCGCUCUCGCAGACCCGA	5.45	0.49	11.1224	28S
UGGACGAGGCGCCGCCGCCCCCC	5.45	0.49	11.1224	28S
GCGGCGACUCUGGACGCGAGCCGGGC	357.02	32.36	11.0328	28S
GAAUACCGGGUGCUGUAGGCUU	16.16	1.47	10.9932	5S_rRNA
CGACUCUUAGCGGUGGAUC	18.6	1.72	10.814	5.8S
CGCCGCGGCUGGACGAGGC	5.26	0.49	10.7347	28S
GCGGUGGAUCACUCGGCUCGUGCGUCGA	23.68	2.21	10.7149	5.8S
GCUGGACGAGGCGCCGCCGC	15.6	1.47	10.6122	28S
GGUCAGUCGGUCCUGAGAGAUGGGCG	18.23	1.72	10.5988	28S
GCGCGGGACAUGUGGCGUACGGAAGAC	98.09	9.31	10.536	28S
AGGGAAGUCGGCAAGCCG	2.63	0.25	10.52	28S
CAAAUCGGUCGUCCGACCUGGGUAU	2.63	0.25	10.52	28S
CCUAGCAGCCGACUUAGAACUGGUGCGG	2.63	0.25	10.52	28S
CGCAAGACGGACCAGAGCGAAAGCAUU	2.63	0.25	10.52	18S
CGCAUGAAUGGAUGAACGAG	2.63	0.25	10.52	28S
CGUGGACGGUGUGAGGCCGGUAGCGGCC	2.63	0.25	10.52	28S
CUUCGGGAUAAGGAUUGGC	2.63	0.25	10.52	28S
GCCGAUCGAAAGGGAGUC	2.63	0.25	10.52	28S
GGAUGCGUGCAUUUAUCAGAUCA	2.63	0.25	10.52	18S
GGCUGGGCGCGCGCCGCGGCUGGACG	2.63	0.25	10.52	28S
GUGGAGCGAUUUGUCUGGUU	2.63	0.25	10.52	18S
UCUCGUCGCGCGCGCGUCCGCUGGGGGCG	2.63	0.25	10.52	28S
CGCGAAGCGGGGCUGGGCG	15.41	1.47	10.483	28S
CGCGAAGCGGGGCUGGGCGCGCGCCG	5.07	0.49	10.3469	28S
GCAGCUAGGAAUAAUGGAAUAG	5.07	0.49	10.3469	18S
CGGGACAUGUGGCGUACGGAAGAC	230.37	22.55	10.216	28S
CGGACUGUCCCCAGUGCGCC	7.52	0.74	10.1622	28S
CGGUGGAUCACUCGGCUC	46.79	4.66	10.0408	5.8S
CCCUCGGGAGGGCGCG	4.89	0.49	9.97959	28S
CGUCUCGUCGCGCGCGCGUCCGCU	4.89	0.49	9.97959	28S
GGCUGGGCGCGCGCCGCGGCUGGACGAGG	4.89	0.49	9.97959	28S
CACCCCACGUCUCGUCGCGCGCGCGU	7.33	0.74	9.90541	28S
AGGUGUAGAAUAAGUGGGAGGCCC	116.5	11.77	9.89805	28S
CUGGGCGCGCGCCGCGGCUGGA	12.03	1.23	9.78049	28S
CUCCCCGGAGGGGGCGGGCUCCGGCGGGUG	9.58	0.98	9.77551	28S
GGCGACUCUGGACGCGAGCCGGGC	9.58	0.98	9.77551	28S
CGGCGACUCUGGACGCGAGCCGGG	2685.34	274.79	9.77234	28S
AGCGAAUGAUUAGAGGUCUUGGGGC	2.44	0.25	9.76	28S
AUCAUCGACACUUCGAACGCACUUGCGGC	2.44	0.25	9.76	5.8S
CAAUGUAGGUAAGGGAAGUCGGCAAGCCG	2.44	0.25	9.76	28S
CCGCCGGUGAAAUACCACUACUCUGA	2.44	0.25	9.76	28S
CGGACAGGAUUGACAGAUUGAUAG	2.44	0.25	9.76	18S
CGGGUGUUGACGCGAU	2.44	0.25	9.76	28S
GCACCCGGGGGGCCGGCGGCG	2.44	0.25	9.76	28S
UCUAGAGGAAGUAAAAGUCGUA	2.44	0.25	9.76	18S
CCCGCGAGGGGCCCGGGGCGG	4.7	0.49	9.59184	28S
GCGGCGGCGGCGACUCUGGACGCGAGCC	4.7	0.49	9.59184	28S
GCUACGCCUGUCUGAGCGUCG	4.7	0.49	9.59184	5.8S
CGGCGACUCUGGACGCGAGCCGGGC	230.75	24.76	9.31947	28S
UGAUUAGAGGUCUUGGGGC	70.65	7.6	9.29605	28S
CGGCUGGACGAGGCGC	9.02	0.98	9.20408	28S
GAGCGCUGAGAAGACGGUCGAACUUG	4.51	0.49	9.20408	18S
GCGGCGGCGACUCUGGACGCGAGCC	4.51	0.49	9.20408	28S
GGACGGCUGGGAAGGCCCGGCGGGG	4.51	0.49	9.20408	28S
CCGGCGGCGGCGGCGACUCUGGACGCGA	8.83	0.98	9.0102	28S
AAGGAGUCUAACACGUGCGCGAGUCGGGG	2.25	0.25	9	28S
ACGGCCCUGGCGGAGCGCUGAGAAGACGG	2.25	0.25	9	18S
AGGCGGCGGAGGGGCCGCGGGCCG	2.25	0.25	9	28S
CAGUUAAAAAGCUCGUAGUUGGAU	2.25	0.25	9	18S
CCGCGAGGGGCCCGGGGCGG	2.25	0.25	9	28S
CGGCCGCCCCCGGGGAGCCCGGC	2.25	0.25	9	28S
CUACGCCGCGACGAGUAGGAGGGCCG	2.25	0.25	9	28S
GCAGCUAGGAAUAAUGGAAU	2.25	0.25	9	18S
GCGGCGACUCUGGACGCGA	2.25	0.25	9	28S
GCGGUGGAUCACUCGGCUCGUGCGUCG	2.25	0.25	9	5.8S
GCUGGACGAGGCGCCGCC	2.25	0.25	9	28S
GGCGCGGGACAUGUGGCGUACGGAA	2.25	0.25	9	28S
UGUGGUGUGCGUCGGAG	2.25	0.25	9	28S
ACUCUGGACGCGAGCCGGG	15.41	1.72	8.9593	28S
GCGGGACAUGUGGCGUACGGAAGACCCG	13.15	1.47	8.94558	28S
CGGCGACUCUGGACGCGAGCCGGGCCCUUC	6.58	0.74	8.89189	28S
GCGACUCUGGACGCGAGCCGGGC	6.58	0.74	8.89189	28S
AGGAUAGCUGGCGCUCUCGCAGACCCGA	95.83	10.79	8.88137	28S
CUGGACGCGAGCCGGGCCCUUC	8.64	0.98	8.81633	28S
CUCCCCGGAGGGGGCGGGCUCCG	4.32	0.49	8.81633	28S
GGAAACUCUGGUGGAGGUCCGUAGCG	4.32	0.49	8.81633	28S
CGGGACAUGUGGCGUACGGAAGACCC	32.13	3.68	8.73098	28S
CGCGCGUGUGGUGUGCGUCGGA	8.46	0.98	8.63265	28S
CACCCCACGUCUCGUCGCG	14.84	1.72	8.62791	28S
GGCGACUCUGGACGCGAGCCGG	67.27	7.84	8.58036	28S
GCGGCGGCGACUCUGGACGCGAGCCGGGC	71.4	8.33	8.57143	28S
CAGCAGUUGAACAUGGGUCAGUCGGUCC	4.13	0.49	8.42857	28S
GGAAGUCGGCAAGCCGGAUC	4.13	0.49	8.42857	28S
GCGACUCUGGACGCGAGCCGG	35.14	4.17	8.42686	28S
GCGCGAAGCGGGGCUGGGCG	10.33	1.23	8.39837	28S
CCUCCCCGGAGGGGGCGGGCUCCGG	6.2	0.74	8.37838	28S
CGGCUGGACGAGGCGCC	6.2	0.74	8.37838	28S
GGCACCCGGGGGGCCGGCGGCG	6.2	0.74	8.37838	28S
AGCGCACGUGUUAGGACCCGAAAGAUGG	2.07	0.25	8.28	28S
AUCGGGGAUUGCAAUUA	2.07	0.25	8.28	18S
CAAGAACGAAAGUCGGAGGUUCGAAGACG	2.07	0.25	8.28	18S
CACGUGUUAGGACCCGAAAGAUGGUGAA	2.07	0.25	8.28	28S
CAGCUAGGAAUAAUGGAAUAG	2.07	0.25	8.28	18S
CCCGAAGAGGGGGACGGCGGAGC	2.07	0.25	8.28	28S
CCGCGAGGGGCCCGGGG	2.07	0.25	8.28	28S
CCGGGCCCUUCCCGUGGAUCGCCCCAG	2.07	0.25	8.28	28S
CGCGCCGCGGCUGGACGAGGCGCCGCCG	2.07	0.25	8.28	28S
CGCGGGAGGGCGCGUGCCCCGC	2.07	0.25	8.28	28S
CGGGAUAAGGAUUGGC	2.07	0.25	8.28	28S
CGGUGCGCCGCGACCGGCUCCGGGACG	2.07	0.25	8.28	28S
CUGCAGUUAAAAAGCUCGUAGUUGGA	2.07	0.25	8.28	18S
GAAACUCUGGUGGAGGUCCGUAGCG	2.07	0.25	8.28	28S
GACGGCUGGGAAGGCCCGGCGGG	2.07	0.25	8.28	28S
GUGGAGCGAUUUGUCUGGU	2.07	0.25	8.28	18S
UCGGGGCCACGCGCGCGUCCCC	2.07	0.25	8.28	28S
CGGUGGAUCACUCGGCU	10.15	1.23	8.25203	5.8S
CACCCCACGUCUCGUCGCGCG	18.23	2.21	8.24887	28S
GAAUACCGGGUGCUGUAGGCU	12.03	1.47	8.18367	5S_rRNA
AGGAUAGCUGGCGCUCUCGCAGACCCGAC	21.98	2.7	8.14074	28S
GCGGCGACUCUGGACGCGAGCCGGG	3586.71	442.7	8.1019	28S
CGGGACAUGUGGCGUACGGAAGACCCGCU	3.95	0.49	8.06122	28S
GCGACUCUGGACGCGAGCCGGGCC	3.95	0.49	8.06122	28S
UGCGUCGGAGGGCGGCG	3.95	0.49	8.06122	28S
AAGAACGAAAGUCGGAGGUUCGAAGACGA	5.83	0.74	7.87838	18S
UCAUUAAUCAAGAACGAAAGUCGGAGG	5.83	0.74	7.87838	18S
CGACUCUUAGCGGUGGAUCA	36.08	4.66	7.74249	5.8S
AGGGCCGCUGCGGUGAGCCUUGAAGCCUAG	7.52	0.98	7.67347	28S
CCCCACGUCUCGUCGCGCGC	7.52	0.98	7.67347	28S
CCCGGACACGGACAGGAUUGACAGAUUG	3.76	0.49	7.67347	18S
GGCUGGGCGCGCGCCGCGGCUGGACGAG	3.76	0.49	7.67347	28S
UGGACGAGGCGCCGCCGCCCCC	5.64	0.74	7.62162	28S
CGUAACUUCGGGAUAAGGAUUG	39.08	5.15	7.58835	28S
ACGUGUUAGGACCCGAAAGAUGG	1.88	0.25	7.52	28S
AGAGGUGUAGAAUAAGUGGGA	1.88	0.25	7.52	28S
AUAACGAACGAGACUCUGGCAUG	1.88	0.25	7.52	18S
CAGUGCGGUAACGCGACCGAUCCCGGAGA	1.88	0.25	7.52	28S
CCGCGGCUGGACGAGG	1.88	0.25	7.52	28S
CCGGGUGCUGUAGGCUUU	1.88	0.25	7.52	5S_rRNA
CUCCUCGGCGCGCGGCG	1.88	0.25	7.52	28S
GAGGUGUAGAAUAAGUGGGAGG	1.88	0.25	7.52	28S
GCCAUGAUUAAGAGGGACG	1.88	0.25	7.52	18S
UCGGGGAUUGCAAUUAUU	1.88	0.25	7.52	18S
UGGGCGCGCGCCGCGGCUGGACGAGGC	1.88	0.25	7.52	28S
UUCGUGAUGGGGAUCGGGGA	1.88	0.25	7.52	18S
CUAAGGGCUGGGUCGGUCGGG	7.33	0.98	7.47959	28S
CUGGGCGCGCGCCGCGGCUGG	18.04	2.45	7.36327	28S
GCCCUGGCGGAGCGCUGAGAAGACG	21.42	2.94	7.28571	18S
CUCUGGACGCGAGCCGGG	14.28	1.96	7.28571	28S
CGCGCGUGUGGUGUGCGUCGGAGGG	3.57	0.49	7.28571	28S
GGGGCCCAAGUCCUUCUGAUCGAGGCC	3.57	0.49	7.28571	28S
GCGCGGGACAUGUGGCGUACGGAA	23.11	3.19	7.24451	28S
CGGUGGAUCACUCGGCUCGUG	31.76	4.41	7.20181	5.8S
GCUGGACGAGGCGCCG	19.35	2.7	7.16667	28S
GAACCUGCGGAAGGAUCAUUA	5.26	0.74	7.10811	18S
GCAGUUGAACAUGGGUCAGUCGGUCC	5.26	0.74	7.10811	28S
CGGGACAUGUGGCGUA	6.95	0.98	7.09184	28S
GGCGCGCGCCGCGGCUGGACGAGG	8.64	1.23	7.02439	28S
CCGACUUAGAACUGGUGCGG	13.72	1.96	7	28S
CACCCCACGUCUCGUCGCGC	3.38	0.49	6.89796	28S
CACCCCACGUCUCGUCGCGCGC	3.38	0.49	6.89796	28S
CAUUAAUCAAGAACGAAAGUCGGAG	3.38	0.49	6.89796	18S
GCGACUCUGGACGCGAGCCGGGCCCUU	3.38	0.49	6.89796	28S
GCGGCGGAGGGGCCGCGGGCCG	3.38	0.49	6.89796	28S
AGGUGUAGAAUAAGUGGGAGGCCCCCGG	28.75	4.17	6.89448	28S
GCGCAAGACGGACCAGAGCGAAAG	5.07	0.74	6.85135	18S
CUGGGCGCGCGCCGCGGCUGGACG	11.65	1.72	6.77326	28S
CAGGGGCCGGCGGCGGC	8.27	1.23	6.72358	28S
CGGGAGGGCGCGCGGGUCGGGG	14.47	2.21	6.54751	28S
CGCCGCGGCUGGACGAGGCGCCGCCG	83.24	12.75	6.52863	28S
AACGAGAACUUUGAAGGCCGAAGUGGAGA	3.19	0.49	6.5102	28S
ACAGGAUUGACAGAUUGAUAGCU	3.19	0.49	6.5102	18S
AUGAACGAGGAAUUCCCAGUAAGUGCGGG	3.19	0.49	6.5102	18S
CCCGCGAGGGGCCCGGGG	3.19	0.49	6.5102	28S
CCGCGAGGCGUCCAGUGCGGUAACGCGA	3.19	0.49	6.5102	28S
CGGACAGGAUUGACAGAUUGAUAGC	3.19	0.49	6.5102	18S
CGGUGGAUCACUCGGCUCGUGCGUCGAU	112.55	17.4	6.46839	5.8S
CGGCGACUCUGGACGCGAGCCGGGCC	114.06	17.65	6.46232	28S
GCGGCGACUCUGGACGCGAGCCGGGCC	208.76	32.36	6.45117	28S
CGGUGGAUCACUCGGCUCGUGCGU	255.74	39.71	6.44019	5.8S
CGGCGACUCUGGACGCGAGC	17.29	2.7	6.4037	28S
GCGCGCGCCGCGGCUGGACGAGG	9.4	1.47	6.39456	28S
AAAAUGGAUGGCGCUGGAGCGU	4.7	0.74	6.35135	28S
CGGCUGGACGAGGCGCCGC	4.7	0.74	6.35135	28S
ACAGCAGUUGAACAUGGGUCAGUCGGU	6.2	0.98	6.32653	28S
CCGACUUAGAACUGGUGCGGA	23.11	3.68	6.27989	28S
GCGAGAAUUAAUGUGAAUUGCAGGACA	7.7	1.23	6.26016	5.8S
GCGACUCUGGACGCGAGCCG	36.64	5.88	6.23129	28S
ACAAUGUAGGUAAGGGAAGUCGG	3.01	0.49	6.14286	28S
AUCGAAAGGGAGUCGG	3.01	0.49	6.14286	28S
CGCGUGUGGUGUGCGUCGGAG	3.01	0.49	6.14286	28S
CGGCGGCGGCGACUCUGGACGCGAGC	3.01	0.49	6.14286	28S
GAAAAGAACUUUGAAGAGAGAGU	3.01	0.49	6.14286	28S
GGGCUGGGCGCGCGCCGCGGCUGG	3.01	0.49	6.14286	28S
GUGGAUCACUCGGCUCGUGCG	3.01	0.49	6.14286	5.8S
CGAUAACGAACGAGACUCUGGCAUG	6.01	0.98	6.13265	18S
GCGGCGACUCUGGACGCGAGC	72.16	11.77	6.13084	28S
CGUCUCGUCGCGCGCGCGU	10.52	1.72	6.11628	28S
GCAGUUGAACAUGGGUCAGUCGGUC	10.52	1.72	6.11628	28S
CCCGUGGACGGUGUGA	4.51	0.74	6.09459	28S
CGCGCCGCGGCUGGACGAGGCG	29.69	4.9	6.05918	28S
GCUGGACGAGGCGCCGCCG	26.68	4.41	6.04989	28S
CGGUGGAUCACUCGGCUCGUGCGUC	101.84	16.91	6.02247	5.8S
CGCGGGAGGGCGCGUGCCCCGCCG	11.65	1.96	5.94388	28S
CCUCGGGAGGGCGCGCGGGUCGGGG	42.09	7.11	5.91983	28S
ACUUCGGGAUAAGGAUUGGCU	113.68	19.36	5.8719	28S
CGCGGGACAUGUGGCGUACGGAAGA	105.04	17.89	5.87144	28S
CAGUCGGUCCUGAGAGAUGGG	4.32	0.74	5.83784	28S
CCGCGGCUGGACGAGGCGCCGC	4.32	0.74	5.83784	28S
GCAGCCGACUUAGAACUGGUGCGGAC	4.32	0.74	5.83784	28S
GCGGUGGAUCACUCGGCUCGUGCG	19.92	3.43	5.80758	5.8S
ACUUAGAACUGGUGCGG	7.14	1.23	5.80488	28S
CUAAUUAGUGACGCGCAUGAAUGG	29.88	5.15	5.80194	28S
CUGAGAAGACGGUCGAACUUG	29.88	5.15	5.80194	18S
ACUUCGGGAUAAGGAUUGGC	22.74	3.92	5.80102	28S
CCCGGGGGGCCGGCGGCG	9.96	1.72	5.7907	28S
GCGGCGGCGACUCUGGACGCGAGCCGGG	225.3	38.97	5.78137	28S
ACCCCACGUCUCGUCGCGCGC	5.64	0.98	5.7551	28S
AAAUCGGUCGUCCGACCUGGGUAUAGGGG	2.82	0.49	5.7551	28S
AAGCGAAUGAUUAGAGGUCUUGGGG	2.82	0.49	5.7551	28S
ACAGCAGUUGAACAUGGGUCAGU	2.82	0.49	5.7551	28S
AGGGGCCCGGGGCGGGG	2.82	0.49	5.7551	28S
CCCCACCCCACGUCUCGUCG	2.82	0.49	5.7551	28S
CGAGAACUUUGAAGGCCGAAGUG	2.82	0.49	5.7551	28S
CGGAGGGGCCGCGGGCCGGU	2.82	0.49	5.7551	28S
CGGCGGGGGGAGAAGGGUC	2.82	0.49	5.7551	28S
CUACGCCUGUCUGAGCGUCG	2.82	0.49	5.7551	5.8S
GAACUGGUGCGGACCAGGGGAAUCCGACUG	2.82	0.49	5.7551	28S
GCUGGACGAGGCGCCGCCGCCCCC	2.82	0.49	5.7551	28S
CCCCACGUCUCGUCGCGCG	25.18	4.41	5.70975	28S
GCGGCGACUCUGGACGCGAGCCGGGCCCUU	69.52	12.26	5.67047	28S
GGCGACUCUGGACGCGAGCCGGG	260.62	46.08	5.65582	28S
AGGUGUAGAAUAAGUGGGAGGCCCCCG	113.31	20.1	5.63731	28S
CUCCCCGGAGGGGGCGGGCUCCGGCGGGU	8.27	1.47	5.62585	28S
CUGCGGGAUGAACCGAACGCCGGGU	4.13	0.74	5.58108	28S
CGGCGGCGGCGACUCUGGACGCGAGCCGGG	31.19	5.64	5.53014	28S
CCGCGGCUGGACGAGGCGCCGCCG	8.08	1.47	5.4966	28S
CCCGGGUCUUCCCGGAGUCGGGUUG	6.76	1.23	5.49593	28S
CGCGAAGCGGGGCUGGG	6.76	1.23	5.49593	28S
GCGGCGGCGGCGACUCUGGACGCGAGCCGG	10.71	1.96	5.46429	28S
CCACCCCACGUCUCGUCGCG	13.34	2.45	5.4449	28S
CGCGCGCGUGUGGUGUG	14.66	2.7	5.42963	28S
GGCGCGAAGCGGGGCUGG	13.15	2.45	5.36735	28S
UGAAUUGCAGGACACAUUGAUCAUCGACA	10.52	1.96	5.36735	5.8S
CACGCCCGGGGCACCCCCCUCGCGG	5.26	0.98	5.36735	28S
CUCCUCGGCGCGCGGCGGCG	5.26	0.98	5.36735	28S
AAGGCCCGCGGCGGGUGUUGACGCGAU	2.63	0.49	5.36735	28S
AAUUAAAACAAAGCAUCGCGAAGGCCCG	2.63	0.49	5.36735	28S
CCGCCCCCGGGGCCGCGGUU	2.63	0.49	5.36735	28S
CCGGGUGCUGUAGGCUU	2.63	0.49	5.36735	5S_rRNA
CGCAAGACGGACCAGAG	2.63	0.49	5.36735	18S
GCUACGCCUGUCUGAGCGUC	2.63	0.49	5.36735	5.8S
GGGGGCCGGCGGCGGCGGCGACUCU	2.63	0.49	5.36735	28S
GCGGCGGCGACUCUGGACGCGAGCCGG	55.24	10.3	5.36311	28S
CCCUUCCCGUGGAUCGCCCCAG	3.95	0.74	5.33784	28S
CGCCGCGUGGGGGCGGCGGCGGG	3.95	0.74	5.33784	28S
CGGCGGCGACUCUGGACGCGAGCC	3.95	0.74	5.33784	28S
CGGCUGGACGAGGCGCCGCCGCC	3.95	0.74	5.33784	28S
GGACAGGAUUGACAGAUUGAUAGC	3.95	0.74	5.33784	18S
CGGCGGCGACUCUGGACGCGAGCCGGGC	15.6	2.94	5.30612	28S
CACGUCUCGUCGCGCGCGCGUC	121.57	23.04	5.27648	28S
UAACUUCGGGAUAAGGAUUG	7.7	1.47	5.2381	28S
GUGCGGUAACGCGACCGAUCCCGGA	15.22	2.94	5.17687	28S
CCCCACGUCUCGUCGCGCGCGCGU	5.07	0.98	5.17347	28S
GGCGGCGACUCUGGACGCGAGCCGG	50.73	9.81	5.17125	28S
CCUCCCCGGAGGGGGCGGGCUCCGGCG	114.81	22.31	5.14612	28S
GCGCAAGACGGACCAGAG	7.52	1.47	5.11565	18S
AAAAGCUCGUAGUUGGA	3.76	0.74	5.08108	18S
ACUCUGGACGCGAGCCGGGC	3.76	0.74	5.08108	28S
CGGCGGCGACUCUGGACGCGAGC	3.76	0.74	5.08108	28S
GGCUGGGCGCGCGCCGCGGCUGGA	3.76	0.74	5.08108	28S
ACUUCGGGAUAAGGAUUG	22.36	4.41	5.07029	28S
CUUCCCGUGGAUCGCCCCAG	4.89	0.98	4.9898	28S
UUCUAUUUUGUUGGUUUUCGGAA	4.89	0.98	4.9898	18S
GGGCGCGCGCCGCGGCUGGACGAGG	14.66	2.94	4.98639	28S
UCCUCCCCGGAGGGGGCGGGCUCCGGCG	29.31	5.88	4.98469	28S
AAGCGAAUGAUUAGAGGUCU	2.44	0.49	4.97959	28S
CAUGAAUGGAUGAACGA	2.44	0.49	4.97959	28S
CCACGUCUCGUCGCGCGC	2.44	0.49	4.97959	28S
CCCGGACACGGACAGGAUU	2.44	0.49	4.97959	18S
CGACUUAGAACUGGUGCGGAC	2.44	0.49	4.97959	28S
CGCAAGACGGACCAGA	2.44	0.49	4.97959	18S
CGCGCGCGCGUGUGGUGUGCGUCGGAG	2.44	0.49	4.97959	28S
CGUGGCGCAAUGAAGGUGAAGGCCGG	2.44	0.49	4.97959	28S
GAAACUCUGGUGGAGGUCCGU	2.44	0.49	4.97959	28S
GUGGAGGUCCGUAGCGGUCCUGA	2.44	0.49	4.97959	28S
UCCGUAGGUGAACCUGCGGAAGGAUCAUUA	2.44	0.49	4.97959	18S
GUAGGUGAACCUGCGGAAGGAUCAUUA	32.88	6.62	4.96677	18S
CCCACCCCACGUCUCGUCGCG	3.57	0.74	4.82432	28S
CGGCGGCGGCGACUCUGGACGCGAG	3.57	0.74	4.82432	28S
UAACUUCGGGAUAAGGAUUGG	3.57	0.74	4.82432	28S
CCCGUGGACGGUGUGAG	4.7	0.98	4.79592	28S
GAAUACCGGGUGCUGUAGGCUUU	4.7	0.98	4.79592	5S_rRNA
GCUGGCGUGGAGCCGGGCGUG	4.7	0.98	4.79592	28S
CACGUCUCGUCGCGCGCGCGU	193.73	40.69	4.76112	28S
CUGGACGAGGCGCCGCCG	11.65	2.45	4.7551	28S
AGAAUUAAUGUGAAUUGCAGGACA	6.95	1.47	4.72789	5.8S
GCAGCCGACUUAGAACUGGUGCGG	6.95	1.47	4.72789	28S
GGCGGCGACUCUGGACGCGAGCC	6.95	1.47	4.72789	28S
CCCACGUCUCGUCGCGCG	8.08	1.72	4.69767	28S
GCGCUGAGAAGACGGUCGAACUUG	9.02	1.96	4.60204	18S
GAGGUGUAGAAUAAGUGGGAGGCCC	39.46	8.58	4.59907	28S
ACUCUUAGCGGUGGAUCACUCGGCUCGU	2.25	0.49	4.59184	5.8S
CAAAUCGGUCGUCCGACCUGGGUAUA	2.25	0.49	4.59184	28S
GAGCCUCGGUUGGCCUCGGAUAGCCGGUCC	2.25	0.49	4.59184	28S
GCCGAUCGAAAGGGAGU	2.25	0.49	4.59184	28S
GCCGGCGGCGGCGGCGACUCUGGACGCG	2.25	0.49	4.59184	28S
GCUAGAGGUGAAAUUCUUGGACCGGCG	2.25	0.49	4.59184	18S
GCUGCAGUUAAAAAGCUCGUAGUUGGAU	2.25	0.49	4.59184	18S
GGGGCUGGGCGCGCGCCGCG	2.25	0.49	4.59184	28S
GGUGGAUCACUCGGCUCGUGCGUCGA	2.25	0.49	4.59184	5.8S
AGCUAGCUGCGAGAAUUAAUGUG	5.64	1.23	4.58537	5.8S
AGAAGACGGUCGAACUUGACUAU	3.38	0.74	4.56757	18S
AUCGGGGAUUGCAAUUAU	3.38	0.74	4.56757	18S
CGCGAAGCGGGGCUGGGCGCGCGCCGCGG	3.38	0.74	4.56757	28S
GCUAGCUGCGAGAAUUAA	3.38	0.74	4.56757	5.8S
CGAAGGGACGGGCGAUGGC	8.83	1.96	4.5051	28S
CUCCCCGGAGGGGGCGGGCUCCGGCGG	12.97	2.94	4.41156	28S
GCCGGCGGCGGCGGCGACUCUGG	4.32	0.98	4.40816	28S
CGGCGGCGACUCUGGACGCGAGCCGGGCC	6.39	1.47	4.34694	28S
CUCGUCUGAUCUCGGAAGCUAAGCAGGGU	6.39	1.47	4.34694	5S_rRNA
CUGGGCGCGCGCCGCGGCUGGACGA	6.39	1.47	4.34694	28S
UCCCCGGAGGGGGCGGGCUCCGGCG	6.39	1.47	4.34694	28S
CGGCGGCGACUCUGGACGCGAGCCGGG	88.31	20.35	4.33956	28S
CGCCGCGGCUGGACGAGGCGC	11.65	2.7	4.31481	28S
AUCGGGGAUUGCAAUUAUU	3.19	0.74	4.31081	18S
CGCAAGACGGACCAGAGCGAAAGC	3.19	0.74	4.31081	18S
CGCGAAGCGGGGCUGGGCGCG	36.83	8.58	4.29254	28S
AACAGCAGUUGAACAUGGGUCAGUCG	5.26	1.23	4.27642	28S
CACCCCACGUCUCGUCGCGCGCGCGUC	5.26	1.23	4.27642	28S
GCGCGAAGCGGGGCUGGGCGC	5.26	1.23	4.27642	28S
CCGCGGCUGGACGAGGCGCCG	53.18	12.5	4.2544	28S
CGCAAGACGGACCAGAGCG	13.53	3.19	4.24138	18S
CGGGACAUGUGGCGUACGGAAGACC	37.39	8.82	4.23923	28S
ACGGACCAAGGAGUCUAACACGUGCGCG	2.07	0.49	4.22449	28S
AGGGAAGUCGGCAAGCCGGAUCCG	2.07	0.49	4.22449	28S
CCGAAGGGACGGGCGAUG	2.07	0.49	4.22449	28S
CCGCGAGGGGCCCGGGGCGGG	2.07	0.49	4.22449	28S
CCGGAGUGGCGGAGAUGGG	2.07	0.49	4.22449	28S
CGGAGCGCUGAGAAGACGGUCG	2.07	0.49	4.22449	18S
CGGGCGGCGGAGGGGCCGCGGG	2.07	0.49	4.22449	28S
CUAACACGUGCGCGAGUCGGG	2.07	0.49	4.22449	28S
CUAUUUUGUUGGUUUUCGGAACUG	2.07	0.49	4.22449	18S
CUCGGGGCCACGCGCGCGUCCCCCG	2.07	0.49	4.22449	28S
CUGGACGAGGCGCCGC	2.07	0.49	4.22449	28S
CUGGACGCGAGCCGGGCCCUUCC	2.07	0.49	4.22449	28S
GAACAUGGGUCAGUCGGUCCUGAG	2.07	0.49	4.22449	28S
GAUAACGAACGAGACUCUGGCAUGCUAA	2.07	0.49	4.22449	18S
GCGCGAAGCGGGGCUGGGC	2.07	0.49	4.22449	28S
GCGCGCUCGCCGGCCGAGGUG	2.07	0.49	4.22449	28S
GGUCAGUCGGUCCUGAGA	2.07	0.49	4.22449	28S
GGUCGGGCCUGGUUAGU	2.07	0.49	4.22449	5S_rRNA
UGAAUUGCAGGACACA	2.07	0.49	4.22449	5.8S
CUCCCCGGAGGGGGCGGGCUCCGGC	6.2	1.47	4.21769	28S
CGACUCUGGACGCGAGCCGGGC	4.13	0.98	4.21429	28S
GCAGGACACAUUGAUCAUCGACA	4.13	0.98	4.21429	5.8S
GCGGCGGCGACUCUGGACGCGAGCCGGGCC	43.03	10.3	4.17767	28S
CACGUCUCGUCGCGCGCG	164.6	39.47	4.17026	28S
CGAAGCGGGGCUGGGCGCGCG	12.21	2.94	4.15306	28S
AGGGAACGGGCUUGGCGGAAUC	18.23	4.41	4.13379	28S
CAGCCGACUUAGAACUGGUGCGG	8.08	1.96	4.12245	28S
AGUCGAGAGUGGACGGG	5.07	1.23	4.12195	28S
GCUGGACGAGGCGCCGCCGCC	6.01	1.47	4.08844	28S
AGAGGUGUAGAAUAAGUGGGAGGCCC	66.89	16.42	4.07369	28S
AAGCGGGGCUGGGCGCGCGCCGCG	3.01	0.74	4.06757	28S
CCCGGACACGGACAGGAUUGA	3.01	0.74	4.06757	18S
GAACAUGGGUCAGUCGGUCCUG	3.01	0.74	4.06757	28S
GCUGGACGAGGCGCCGCCGCCCCCC	3.01	0.74	4.06757	28S
GCUGGGCGCGCGCCGCGGCUGGACGA	3.01	0.74	4.06757	28S
GGGCCGGCGGCGGCCCGCC	9.96	2.45	4.06531	28S
CCUCCCCGGAGGGGGCG	10.9	2.7	4.03704	28S
CGAGAAUUAAUGUGAAUUGCAGGACA	3.95	0.98	4.03061	5.8S
CGCCGCGUGGGGGCGGCGGCGGGGGGA	3.95	0.98	4.03061	28S
GCUCUAAGGGCUGGGUCGGUC	3.95	0.98	4.03061	28S
CGCCGCGGCUGGACGAGGCGCCG	441.95	109.82	4.02431	28S
CCGCGGCUGGACGAGGCG	8.83	2.21	3.99548	28S
CUCCCCGGAGGGGGCGGGCUCCGGCG	206.32	51.72	3.98917	28S
GGGCGCGCGCCGCGGCUGGACGAG	139.61	35.3	3.95496	28S
GUGCGGUAACGCGACCGAUCCCGGAGA	12.59	3.19	3.94671	28S
CGUAGUUGGAUCUUGGGAG	6.76	1.72	3.93023	18S
CAGCCGACUUAGAACUGGUGCGGA	9.58	2.45	3.9102	28S
AAUUGCAGGACACAUUGAUCAUCGACACU	8.64	2.21	3.9095	5.8S
CGGCCCUGGCGGAGCGCUGAGAAGACG	22.92	5.88	3.89796	18S
GCGGGACAUGUGGCGUACGGAAGA	52.24	13.48	3.87537	28S
CGACUCUUAGCGGUGGAU	34.95	9.07	3.85336	5.8S
AGCUUGACUCUAGUCUGGCACGG	3.76	0.98	3.83673	28S
GGCGACUCUGGACGCGAGCCGGGCCCUU	3.76	0.98	3.83673	28S
UACGCCUGUCUGAGCGUCGCUU	3.76	0.98	3.83673	5.8S
AGAUUGAGCAAUAACAGGU	1.88	0.49	3.83673	18S
AGGUGAAAUUCUUGGACCGGCGCAAGACG	1.88	0.49	3.83673	18S
AUCGGUCGUCCGACCUGGGUAUA	1.88	0.49	3.83673	28S
AUGGGCGAGCGCCGUUCCGAAGGGACG	1.88	0.49	3.83673	28S
CACGGACCAAGGAGUCUAACACGUGCGCG	1.88	0.49	3.83673	28S
CCACCCCACGUCUCGUCGCGC	1.88	0.49	3.83673	28S
CCCGGACACGGACAGGAUUG	1.88	0.49	3.83673	18S
CCUCGACACAAGGGUUUGU	1.88	0.49	3.83673	28S
CCUGGGAAUACCGGGUGCUGUAGGCUUU	1.88	0.49	3.83673	5S_rRNA
CGCGCGCGCGUGUGGUG	1.88	0.49	3.83673	28S
CGCGCGCGUGUGGUGU	1.88	0.49	3.83673	28S
CGGACAGGAUUGACAGAUUGAUA	1.88	0.49	3.83673	18S
CGGACUGUCCCCAGUGC	1.88	0.49	3.83673	28S
CGGGGUUUCGUACGUAGCAGAGCAGCU	1.88	0.49	3.83673	28S
CUAGGAAUAAUGGAAUAGGACCGCGGU	1.88	0.49	3.83673	18S
CUUUUGGUAAGCAGAACUGGCGCUG	1.88	0.49	3.83673	28S
GCUCCGGGACGGCUGGGAAGG	1.88	0.49	3.83673	28S
GGAUGAACCGAACGCCGG	1.88	0.49	3.83673	28S
GGGCUGGGCGCGCGCCGCGGCUGGA	1.88	0.49	3.83673	28S
GGGUCAGUCGGUCCUGAGAGAUGGGCGA	1.88	0.49	3.83673	28S
GUGAACUAUGCCUGGGCAGG	1.88	0.49	3.83673	28S
UGGACGCGAGCCGGGCCCUUC	1.88	0.49	3.83673	28S
UUUUUGAUCCUUCGAUGUCGGCU	1.88	0.49	3.83673	28S
ACUUCGGGAUAAGGAUUGG	15.03	3.92	3.83418	28S
CUUGACUCUAGUCUGGCACGGUG	6.58	1.72	3.82558	28S
CGAAGGGACGGGCGAUGG	4.7	1.23	3.82114	28S
AAUGGGUAAGAAGCCCGGCUCGCUGGCG	2.82	0.74	3.81081	28S
AUCUAAUUAGUGACGCGCAUGAAUGG	2.82	0.74	3.81081	28S
CGCCGCGUGGGGGCGGCGGCGGGGGG	2.82	0.74	3.81081	28S
GCCGGCGGCGGCGGCGACUCUGGACGCGAG	2.82	0.74	3.81081	28S
GCGGCGGCGGCGACUCUGGACGCGAGC	2.82	0.74	3.81081	28S
GGAUAGCUGGCGCUCUCGCAGACCCGA	2.82	0.74	3.81081	28S
GCGCAAGACGGACCAGAGCG	24.24	6.37	3.80534	18S
GCGGGACAUGUGGCGUACGGAAGAC	20.48	5.39	3.79963	28S
CUGAGAAGACGGUCGAACUUGA	22.17	5.88	3.77041	18S
CCGGCGGCGGCGGCGACUCUGGACGCGAG	17.48	4.66	3.75107	28S
CACCCCACGUCUCGUCG	8.27	2.21	3.74208	28S
CGAAUGAUUAGAGGUCUUGGGGC	8.27	2.21	3.74208	28S
CGUCUCGUCGCGCGCGCGUC	8.27	2.21	3.74208	28S
AGGAAACUCUGGUGGAGGUCCGUAG	7.33	1.96	3.7398	28S
CGAAUGAUUAGAGGUCUUG	6.39	1.72	3.71512	28S
AGGAUAGCUGGCGCUCUCGCAGACCCG	29.88	8.09	3.69345	28S
CGGGAUGAACCGAACGCCGGG	12.59	3.43	3.67055	28S
AGGUGAAAUUCUUGGACCGG	4.51	1.23	3.66667	18S
CCCGAAGAGGGGGACGGCGGAG	4.51	1.23	3.66667	28S
ACUUAGAACUGGUGCGGA	26.87	7.35	3.65578	28S
CACCCCACGUCUCGUCGCGCGCGCG	10.71	2.94	3.64286	28S
CGAAUGAUUAGAGGUCUUGGGG	14.28	3.92	3.64286	28S
AGCGCUGAGAAGACGGUCGAACUUG	7.14	1.96	3.64286	18S
CGGACAGGAUUGACAGAUUG	32.88	9.07	3.62514	18S
CAGUCGAGAGUGGACGGGA	9.77	2.7	3.61852	28S
CCACCCCACGUCUCGUCGCGCG	11.46	3.19	3.59248	28S
CGGACAGGAUUGACAGAUUGAUAGCU	5.26	1.47	3.57823	18S
GCGGAGGGGCCGCGGGCCGGU	5.26	1.47	3.57823	28S
GCGGGACAUGUGGCGUACGGAAGACC	7.89	2.21	3.57014	28S
ACCCCACGUCUCGUCGCGCG	17.48	4.9	3.56735	28S
CGCGAAGCGGGGCUGGGCGCGCG	14.84	4.17	3.55875	28S
AAUGAUUAGAGGUCUUGGG	2.63	0.74	3.55405	28S
ACGUGUUAGGACCCGAAAGAUGGUG	2.63	0.74	3.55405	28S
AGCAGGACGGUGGCCAUGGAAGUCGG	2.63	0.74	3.55405	28S
AUUCGUGAUGGGGAUCGGGG	2.63	0.74	3.55405	18S
CCCGAGGGGCUCUCGCUUCUGGCG	2.63	0.74	3.55405	28S
CCUUGGAAAGCGUCGCG	2.63	0.74	3.55405	28S
GAGGAAACUCUGGUGGAG	2.63	0.74	3.55405	28S
GCACGGUGAAGAGACAUGAGAGGUG	2.63	0.74	3.55405	28S
GCGGCUGGACGAGGCGC	2.63	0.74	3.55405	28S
GGACCCGAAAGAUGGUGAACUAUGC	2.63	0.74	3.55405	28S
UAACUAUGACUCUCUUAAGGUAG	2.63	0.74	3.55405	28S
GGCGCGCGCCGCGGCUGGACGAG	51.3	14.46	3.54772	28S
UACCUGGUUGAUCCUG	29.5	8.33	3.54142	18S
GGCCCUGGCGGAGCGCUGAGAAGACG	42.28	12.01	3.5204	18S
CCCGAAGAGGGGGACGGCGG	4.32	1.23	3.5122	28S
AGGUGUAGAAUAAGUGGGAGGC	6.01	1.72	3.49419	28S
GGCGACUCUGGACGCGAGCCGGGCC	6.01	1.72	3.49419	28S
CCCUCGGGAGGGCGCGCGGGUCG	20.48	5.88	3.48299	28S
CACCCCACGUCUCGUCGCGCGCGCGUCCG	9.4	2.7	3.48148	28S
CUGCGGGAUGAACCGAACGCCGGG	9.4	2.7	3.48148	28S
CACGUCUCGUCGCGCGCGC	35.7	10.3	3.46602	28S
CACGUCUCGUCGCGCGCGCG	139.24	40.2	3.46368	28S
CGCGAAGCGGGGCUGG	10.15	2.94	3.45238	28S
AGCGCUGAGAAGACGGUCGAACUUGACUA	6.76	1.96	3.44898	18S
CCCCACGUCUCGUCGCGCGCGCGUC	6.76	1.96	3.44898	28S
AAAGAACUUUGAAGAGAGAG	3.38	0.98	3.44898	28S
AGGCGGCGGAGGGGCCGCGGG	3.38	0.98	3.44898	28S
GGCCGGCGGCGGCGGCGACUCUGGA	3.38	0.98	3.44898	28S
GUGAACCUGCGGAAGGAUCAUUA	3.38	0.98	3.44898	18S
AAGAAGACCCUGUUGAGCUUGACUC	10.9	3.19	3.41693	28S
GGCGGCGACUCUGGACGCGAGCCGGGC	33.45	9.81	3.40979	28S
CCUGGGAAUACCGGGUGCUGUAGGCU	7.52	2.21	3.40271	5S_rRNA
CCCUCCCCGGGGGAGCGCCGCGUGGGGGCG	5.83	1.72	3.38953	28S
GCGCUGCGGGAUGAACCGAACGCCGG	5.83	1.72	3.38953	28S
CCUCCCCGGAGGGGGCGGGCUCCGGCGG	34.01	10.05	3.38408	28S
CUGGCGGAGCGCUGAGAAGACG	4.13	1.23	3.35772	18S
GUGCGGUAACGCGACCGAUCCCGGAG	4.13	1.23	3.35772	28S
UGAGAGGUGUAGAAUAAGUGGGAGGCCC	4.13	1.23	3.35772	28S
GCGGCGACUCUGGACGCGAGCCGGGCCC	17.29	5.15	3.35728	28S
AGCGAAUGAUUAGAGGUCUUGGGG	6.58	1.96	3.35714	28S
CCCGUGGACGGUGUGAGGC	6.58	1.96	3.35714	28S
CGCGCCGCGGCUGGACGAGG	6.58	1.96	3.35714	28S
GGCUGGGCGCGCGCCGCGGCUGG	6.58	1.96	3.35714	28S
CCCCGAAGAGGGGGACGGCGG	13.15	3.92	3.35459	28S
CGCGGGACAUGUGGCGUACGGAAGAC	39.46	11.77	3.35259	28S
CCUGGGAAUACCGGGUGCUGUAGGCUU	11.46	3.43	3.34111	5S_rRNA
GCAGCCGACUUAGAACUGGUGCGGA	11.46	3.43	3.34111	28S
CAAUGUAGGUAAGGGAAGUCGG	4.89	1.47	3.32653	28S
CGCGGGACAUGUGGCGUACGGAAGACCCGC	12.97	3.92	3.30867	28S
AGAAGACGGUCGAACUUGACUA	8.08	2.45	3.29796	18S
AAGACGGUCGAACUUG	2.44	0.74	3.2973	18S
AGGGUGUAAAUCUCGCGCCGGG	2.44	0.74	3.2973	28S
GAGGUGUAGAAUAAGUGGGAGGCC	2.44	0.74	3.2973	28S
GCUGGACGAGGCGCCGCCGCCC	2.44	0.74	3.2973	28S
CGGCGACUCUGGACGCGAGCCGGGCCCUU	25.74	7.84	3.28316	28S
CGCGCCGGGACCGGGGUCCGGUG	5.64	1.72	3.27907	28S
CCACCCCACGUCUCGUCGCGCGCGCG	3.19	0.98	3.2551	28S
CCCCGGCCGGGGGGCGGGCG	3.19	0.98	3.2551	18S
CCCGAAGAGGGGGACGGCGGAGCGAG	3.19	0.98	3.2551	28S
CGGCAGGGGCCGGCGGCGG	3.19	0.98	3.2551	28S
GUUAGUACUUGGAUGGGAGACCG	7.14	2.21	3.23077	5S_rRNA
AGAAUUAAUGUGAAUUGCAGGACAC	3.95	1.23	3.21138	5.8S
CCCCACGUCUCGUCGCG	3.95	1.23	3.21138	28S
UACCUGGUUGAUCCUGC	97.33	30.4	3.20164	18S
CGACUCUUAGCGGUGGAUCAC	13.34	4.17	3.19904	5.8S
CCGCGCGCGGGUCGGGG	4.7	1.47	3.19728	28S
CGGUGGAUCACUCGGCUCGUGC	4.7	1.47	3.19728	5.8S
GCGGUGGAUCACUCGGCUC	4.7	1.47	3.19728	5.8S
CGCCGCGGCUGGACGAGGCGCC	23.49	7.35	3.19592	28S
AGGUGUAGAAUAAGUGGGAGGCCCC	12.4	3.92	3.16327	28S
CGCGGGACAUGUGGCGUACGGAA	20.11	6.37	3.15699	28S
CGCGCGCCGCGGCUGGACGAG	16.16	5.15	3.13786	28S
GGUGGAUCACUCGGCUCGUGCG	8.46	2.7	3.13333	5.8S
GGCCGCCGGUGAAAUACCACUACUCUGA	25.18	8.09	3.11248	28S
UACCUGGUUGAUCCUGCC	52.24	16.91	3.0893	18S
CAGCAGUUGAACAUGGGUCAGUCGGU	3.01	0.98	3.07143	28S
CGAAGCGGGGCUGGGCGCGCGCCG	3.01	0.98	3.07143	28S
CUAGGAAUAAUGGAAUAGGACCGCGG	3.01	0.98	3.07143	18S
AGAGGUGUAGAAUAAGUGGGAGGCC	4.51	1.47	3.06803	28S
CCGGCGGCGUCCGGUGAGCUCUCGCUG	4.51	1.47	3.06803	28S
UACCUGGUUGAUCCUGCCAGUAGC	13.53	4.41	3.06803	18S
CCGUAACUUCGGGAUAAGGAUUGGCU	6.01	1.96	3.06633	28S
CCCGGGGAGCCCGGCGG	8.27	2.7	3.06296	28S
GGCGGGUGUUGACGCGAUG	177.01	57.85	3.05981	28S
ACCCCACGUCUCGUCG	6.76	2.21	3.05882	28S
CCGACUUAGAACUGGUGCGGACCAGGGGA	6.76	2.21	3.05882	28S
CGGCGGCGGCGACUCUGGACGCGAGCC	3.76	1.23	3.05691	28S
CACGUCUCGUCGCGCGCGCGUCCG	273.59	89.72	3.04938	28S
AGGAUUGACAGAUUGAUAGCU	2.25	0.74	3.04054	18S
AGGGAACGGGCUUGGCGG	2.25	0.74	3.04054	28S
CACGUGUUAGGACCCGAAAGAUGGUG	2.25	0.74	3.04054	28S
CCGAUUGGAUGGUUUAGUGAGGC	2.25	0.74	3.04054	18S
CUAAGGGCUGGGUCGGUCGGGCUGG	2.25	0.74	3.04054	28S
GCGGCGGCGGCGACUCUGGACGCGAGCCG	2.25	0.74	3.04054	28S
GGCGGGGCGGACUGUCCCCAGU	2.25	0.74	3.04054	28S
CGGCCGCCCCCGGGGAGCCCGGCG	33.45	11.03	3.03264	28S
AGGUGAACCUGCGGAAGGAUCAUUA	12.59	4.17	3.01918	18S
GCGCUGCGGGAUGAACCGAACGCCGGG	12.59	4.17	3.01918	28S
GGUCAGUCGGUCCUGAGAGAUGGG	21.42	7.11	3.01266	28S
AUUAGUGACGCGCAUGAAUGGAUG	8.83	2.94	3.0034	28S
GGGAACGGGCUUGGCGGAAUC	16.91	5.64	2.99823	28S
CCCACGUCUCGUCGCGCGCGCGUC	8.08	2.7	2.99259	28S
AGCGCUGAGAAGACGGUCGAACUUGA	7.33	2.45	2.99184	18S
CUGGGAAUACCGGGUGCUGUAGGCUU	5.83	1.96	2.97449	5S_rRNA
UGAAUUGCAGGACACAUUGAU	21.05	7.11	2.96062	5.8S
GGAAUAAUGGAAUAGGACCGCGGUU	5.07	1.72	2.94767	18S
AAAAUGGAUGGCGCUGGAGCGUCGGGC	9.4	3.19	2.94671	28S
CGUCUCGUCGCGCGCG	13.72	4.66	2.94421	28S
CGACUCUUAGCGGUGGAUCACUCGGCUC	18.04	6.13	2.9429	5.8S
GCGCAAGACGGACCAGAGCGAAAGCA	8.64	2.94	2.93878	18S
CCCCACGUCUCGUCGCGCGCGCGUCC	4.32	1.47	2.93878	28S
GCGGCUGGACGAGGCGCCGCCG	4.32	1.47	2.93878	28S
GCAGUCGAGAGUGGACGGG	20.86	7.11	2.9339	28S
CCCCGGCCGGGGGGCGGGCGCCGG	7.89	2.7	2.92222	18S
CUGGACGCGAGCCGGG	34.39	11.77	2.92184	28S
CGACUCUUAGCGGUGGA	57.87	19.86	2.9139	5.8S
GCGGGACAUGUGGCGUACGGAA	13.53	4.66	2.90343	28S
AGCAGUUGAACAUGGGUCAGUCGGUCC	3.57	1.23	2.90244	28S
GUCAGUCGGUCCUGAGAGAUGG	3.57	1.23	2.90244	28S
AACGAGAACUUUGAAGGCCGAAGUGGAG	6.39	2.21	2.8914	28S
CCACCCCACGUCUCGUCGCGCGCG	6.39	2.21	2.8914	28S
GGAUGAACCGAACGCCGGG	6.39	2.21	2.8914	28S
UAACUUCGGGAUAAGGAUUGGCU	6.39	2.21	2.8914	28S
GGCGGCGACUCUGGACGCGAGCCGGG	224.92	77.95	2.88544	28S
AUUCGUGAUGGGGAUCGG	2.82	0.98	2.87755	18S
CCGUCGCCGGCAGUCGAGAGUGGACGGG	2.82	0.98	2.87755	28S
CUAGCUGCGAGAAUUAAUGUG	2.82	0.98	2.87755	5.8S
UUUCGUACGUAGCAGAGCAG	2.82	0.98	2.87755	28S
GCGGGUGUUGACGCGAU	14.09	4.9	2.87551	28S
UAAUUAGUGACGCGCAUGAAUGG	22.36	7.84	2.85204	28S
CCAAGGAGUCUAACACGUGCG	4.89	1.72	2.84302	28S
GUGCGGUAACGCGACCGAUCCCGGAGAA	4.89	1.72	2.84302	28S
UUGGAACAAUGUAGGUAAGGGAAGUCG	4.89	1.72	2.84302	28S
CGCGGGACAUGUGGCGUACGGAAGACC	6.95	2.45	2.83673	28S
GGGUCAGUCGGUCCUGAGAGAUGG	8.27	2.94	2.81293	28S
AAUGAUUAGAGGUCUUGGGG	4.13	1.47	2.80952	28S
CGAGAACUUUGAAGGCCGAAGUGG	10.33	3.68	2.80707	28S
CUGAGAAGACGGUCGAACUUGACUA	10.33	3.68	2.80707	18S
GCGCUGCGGGAUGAACCGAACGCCGGGU	6.2	2.21	2.80543	28S
GCGGGACAUGUGGCGUACGGAAGACCCGC	6.2	2.21	2.80543	28S
AGGGUUCGAUUCCGGAGAGGG	2.07	0.74	2.7973	18S
CGUAGUUGGAUCUUGGG	2.07	0.74	2.7973	18S
CUAGGAAUAAUGGAAUAGGACCGC	2.07	0.74	2.7973	18S
CUGGACGAGGCGCCGCC	2.07	0.74	2.7973	28S
GAGAAUUAAUGUGAAUUGCAGGACA	2.07	0.74	2.7973	5.8S
GAGGGGGCGGGCUCCGGC	2.07	0.74	2.7973	28S
GCGGAGCGCUGAGAAGACG	2.07	0.74	2.7973	18S
GGCGACUCUGGACGCGAGCCGGGCCC	2.07	0.74	2.7973	28S
GUAAGGGAAGUCGGCAAGCCGG	2.07	0.74	2.7973	28S
UCGGGGUUUCGUACGUAGCAGAGCAGCU	2.07	0.74	2.7973	28S
UCGUCUGAUCUCGGAAGCUAAGCAGG	2.07	0.74	2.7973	5S_rRNA
UGGGUCAGUCGGUCCUGAGAGAUGGG	2.07	0.74	2.7973	28S
UGAAUUGCAGGACACAUUGAUCA	12.97	4.66	2.78326	5.8S
CGCCGCGGCUGGACGAG	5.45	1.96	2.78061	28S
GUGGAGGUCCGUAGCGG	5.45	1.96	2.78061	28S
AGGUGAAAUUCUUGGACCGGCGCA	10.15	3.68	2.75815	18S
ACACUUCGAACGCACUUGCGGCCCCG	3.38	1.23	2.74797	5.8S
ACCCCACGUCUCGUCGCGC	3.38	1.23	2.74797	28S
CACGCCCGGGGCACCCCCCUCGCG	3.38	1.23	2.74797	28S
CCACGUCUCGUCGCGCGCG	17.48	6.37	2.74411	28S
CCCCGGAGGGGGCGGGCUCCGGCG	17.48	6.37	2.74411	28S
GCGCGCGCCGCGGCUGGACGAG	38.9	14.22	2.73558	28S
GCCGAUCGAAAGGGAGUCG	4.7	1.72	2.73256	28S
UCAUUAAUCAAGAACGAAAGUCGGAG	4.7	1.72	2.73256	18S
CGGACAGGAUUGACAGAU	6.01	2.21	2.71946	18S
ACGAGAACUUUGAAGGCCGAAGUGGAG	7.33	2.7	2.71481	28S
CGUCUCGUCGCGCGCGCGUCC	8.64	3.19	2.70846	28S
CGACUUAGAACUGGUGCGGA	6.58	2.45	2.68571	28S
GUGGAGGUCCGUAGCGGU	10.52	3.92	2.68367	28S
GCGGAGGGGCCGCGGGCCG	7.89	2.94	2.68367	28S
CGACUUAGAACUGGUGCGG	5.26	1.96	2.68367	28S
CGAGAACUUUGAAGGCCGAAGUGGA	5.26	1.96	2.68367	28S
GUGGAGCGAUUUGUCUGG	5.26	1.96	2.68367	18S
UCCGGAGUGGCGGAGAUGGGCG	5.26	1.96	2.68367	28S
AAGUCGGAGGUUCGAAGA	2.63	0.98	2.68367	18S
ACGCCCGGGGCACCCCCCUCG	2.63	0.98	2.68367	28S
CCCACCCCACGUCUCGUCGCGCGCG	2.63	0.98	2.68367	28S
CUAGGAAUAAUGGAAUAGGA	2.63	0.98	2.68367	18S
GCGGGACAUGUGGCGUACGGAAGACCCGCU	2.63	0.98	2.68367	28S
GCGGGACAUGUGGCGUACGGAAG	36.64	13.73	2.66861	28S
AACAUGGGUCAGUCGGUC	7.14	2.7	2.64444	28S
CACCCCACGUCUCGUCGCGCGCG	11.65	4.41	2.64172	28S
GUGGAGGUCCGUAGCGGUC	11.65	4.41	2.64172	28S
CGACUCUUAGCGGUGGAUCACU	4.51	1.72	2.62209	5.8S
GGGUCAGUCGGUCCUGAGAGAUGGGC	4.51	1.72	2.62209	28S
CCCUCCCCGGGGGAGCGCCGCG	6.39	2.45	2.60816	28S
GCAGUCGAGAGUGGACGGGAG	6.39	2.45	2.60816	28S
UAAUUAGUGACGCGCAUGAAUGGA	9.58	3.68	2.60326	28S
CCCACGUCUCGUCGCGCGC	3.19	1.23	2.5935	28S
CGCAAGACGGACCAGAGC	3.19	1.23	2.5935	18S
CGCGGGACAUGUGGCGUACGGA	3.19	1.23	2.5935	28S
GCAGCCGACUUAGAACUGGUGCGGACCAG	3.19	1.23	2.5935	28S
GCGAAUGAUUAGAGGUCUUGGGG	3.19	1.23	2.5935	28S
CGGCGACUCUGGACGCGAGCCGGGCCC	12.03	4.66	2.58155	28S
AAAAUGGAUGGCGCUGGAG	6.95	2.7	2.57407	28S
AUUAGAGGUCUUGGGGC	6.95	2.7	2.57407	28S
CCGGCAGUCGAGAGUGGACGGG	6.95	2.7	2.57407	28S
AGGAAACUCUGGUGGAG	3.76	1.47	2.55782	28S
UACGCCUGUCUGAGCGUCGCU	77.42	30.4	2.54671	5.8S
CCCCACGUCUCGUCGCGCGCGCGUCCG	11.84	4.66	2.54077	28S
ACAUGUGGCGUACGGAAGACCCG	1.88	0.74	2.54054	28S
ACGGACCAAGGAGUCUAACACGUGCG	1.88	0.74	2.54054	28S
AGCCGACUUAGAACUGGUGCGGACCAGGGG	1.88	0.74	2.54054	28S
AGGGGCUCUCGCUUCUGGCGCCA	1.88	0.74	2.54054	28S
AUCUCGGAAGCUAAGCAGGGUCGGGCCUG	1.88	0.74	2.54054	5S_rRNA
AUGAUUAGAGGUCUUGGGGC	1.88	0.74	2.54054	28S
CACGGACAGGAUUGACAGAUUGA	1.88	0.74	2.54054	18S
CCGCGAGGGGCCCGGGGCG	1.88	0.74	2.54054	28S
CCUCGGGAGGGCGCGCGGGUCGGGGC	1.88	0.74	2.54054	28S
CGCGGGACAUGUGGCGUACGGAAGACCC	1.88	0.74	2.54054	28S
CGGCGGGGGGAGAAGGGU	1.88	0.74	2.54054	28S
CGGCGGGGGGAGAAGGGUCGGG	1.88	0.74	2.54054	28S
GCGGGCCGGUCCCCCCCGCCGGG	1.88	0.74	2.54054	28S
GGAACGGGCUUGGCGGAAUCA	1.88	0.74	2.54054	28S
GGCCGGCGGCGGCGGCGAC	1.88	0.74	2.54054	28S
GGCUGGGCGCGCGCCGC	1.88	0.74	2.54054	28S
GUGCGGACCAGGGGAAUCCGACUGUU	1.88	0.74	2.54054	28S
GUUCUAUUUUGUUGGUUUUCGGAA	1.88	0.74	2.54054	18S
GUUGAACAUGGGUCAGUCGGUC	1.88	0.74	2.54054	28S
UACCUGGUUGAUCCUGCCAG	1.88	0.74	2.54054	18S
GCCCCGGCCGGGGGGCGGGCGCCGG	26.12	10.3	2.53592	18S
GCGGUGGAUCACUCGGCUCGUGCGU	10.52	4.17	2.52278	5.8S
UAAAGGAAUUGACGGAAGGGCACCA	8.64	3.43	2.51895	18S
CGCUGAGAAGACGGUCGAACUUG	11.09	4.41	2.51474	18S
GCUCUAAGGGCUGGGUCGGU	4.32	1.72	2.51163	28S
CCACGUCUCGUCGCGCGCGCGUC	6.76	2.7	2.5037	28S
CUUUUUGAUCCUUCGAUGUCGGCU	4.89	1.96	2.4949	28S
GACUCUUAGCGGUGGA	4.89	1.96	2.4949	5.8S
AGCAGUUGAACAUGGGUCAGUCGGUC	7.33	2.94	2.4932	28S
CGCAAGACGGACCAGAGCGAA	9.77	3.92	2.49235	18S
AACGCGCCCGAUCUCGUCUGAUCUCGG	2.44	0.98	2.4898	5S_rRNA
ACAGCAGUUGAACAUGGGUCAGUCGG	2.44	0.98	2.4898	28S
AUUAGUGACGCGCAUGAAUGGAU	2.44	0.98	2.4898	28S
GAACGGGCUUGGCGGAAUC	2.44	0.98	2.4898	28S
GUUUCGUACGUAGCAGAGCAGCU	2.44	0.98	2.4898	28S
CUCCCCGGAGGGGGCGGGCUCCGGCGGG	100.34	40.45	2.48059	28S
ACGAGAACUUUGAAGGCCGAAGUGGAGA	7.89	3.19	2.47335	28S
GAAAAGAACUUUGAAGAGAGAG	7.89	3.19	2.47335	28S
CUGGACGCGAGCCGGGC	5.45	2.21	2.46606	28S
GCCGCCGGUGAAAUACCACUACUCUGA	5.45	2.21	2.46606	28S
CUAAUUAGUGACGCGCAUGAAUGGA	14.47	5.88	2.46088	28S
GCGCAAGACGGACCAGAGCGAAAGCAU	6.01	2.45	2.45306	18S
UCAGUCGGUCCUGAGAGAUGGGCG	3.01	1.23	2.44715	28S
CCUCCCCGGAGGGGGCGGGCUCCGGCGGG	19.17	7.84	2.44515	28S
CCACGUCUCGUCGCGCGCGCGU	9.58	3.92	2.44388	28S
ACUCUGGACGCGAGCCGG	6.58	2.7	2.43704	28S
CCCCGAAGAGGGGGACGGCGGAGCGAG	6.58	2.7	2.43704	28S
CCGCGGCUGGACGAGGCGC	7.14	2.94	2.42857	28S
GCGGCUGGACGAGGCG	3.57	1.47	2.42857	28S
UGCGUCGGAGGGCGGCGGCG	7.7	3.19	2.41379	28S
AGGGAACGGGCUUGGCG	16.54	6.86	2.41108	28S
CGAGAACUUUGAAGGCCGAAGUGGAG	8.27	3.43	2.41108	28S
CUUUAACGAGGAUCCAUUGGAGGGCA	4.13	1.72	2.40116	18S
AAACUUAAAGGAAUUGACGGAAGGGCA	8.83	3.68	2.39946	18S
GGUGGAUCACUCGGCUCGUGCGU	8.83	3.68	2.39946	5.8S
ACCCCACGUCUCGUCGCGCGCGCGU	4.7	1.96	2.39796	28S
CUACGCCUGUCUGAGCGUCGCU	4.7	1.96	2.39796	5.8S
GCGCGGGACAUGUGGCGUA	4.7	1.96	2.39796	28S
AGCGGUGGAUCACUCGGCUCGUG	5.26	2.21	2.38009	5.8S
UCGAUGAAGAACGCAGCUAGCU	5.83	2.45	2.37959	5.8S
CGCGCCGCGGCUGGACGAG	11.65	4.9	2.37755	28S
CGAAAGGGAGUCGGGU	6.39	2.7	2.36667	28S
UAAUUAGUGACGCGCAUGAAUGGAUG	6.95	2.94	2.36395	28S
UCGAUGAAGAACGCAGCUAGCUG	14.84	6.37	2.32967	5.8S
AGGAAACUCUGGUGGAGG	18.23	7.84	2.32526	28S
CUAAUUAGUGACGCGCAUGAAUG	4.51	1.96	2.30102	28S
CUGAGAAGACGGUCGAACUUGAC	7.89	3.43	2.30029	18S
CUGGACGCGAGCCGGGCC	6.76	2.94	2.29932	28S
AGCCCGUGGACGGUGUGA	3.38	1.47	2.29932	28S
AGGGAAGUCGGCAAGCCGGAU	3.38	1.47	2.29932	28S
CGGCGGCGGCGACUCUGGACGCGAGCCGG	3.38	1.47	2.29932	28S
CUAUUUUGUUGGUUUUCGGAA	7.33	3.19	2.29781	18S
AAGCAGAAUUCACCAAGCGUUG	2.25	0.98	2.29592	28S
CCGCGGCUGGACGAGGCGCC	2.25	0.98	2.29592	28S
CCGGCCGAGGUGGGAUCCCGA	2.25	0.98	2.29592	28S
CCGUAACUUCGGGAUAAGGAUUGG	2.25	0.98	2.29592	28S
CGGGCGGCGGCGGUCGGCGGG	2.25	0.98	2.29592	28S
CUGCUUCUGGGUCGGGG	2.25	0.98	2.29592	28S
CUGGACGCGAGCCGGGCCCUUCCCG	2.25	0.98	2.29592	28S
GAACAUGGGUCAGUCGGUCCUGA	2.25	0.98	2.29592	28S
GCAGUUGAACAUGGGUCAGUCGGUCCU	2.25	0.98	2.29592	28S
GCCCCGGCCGGGGGGCGGGCG	2.25	0.98	2.29592	18S
GCGAAGCGGGGCUGGGCGCGCG	2.25	0.98	2.29592	28S
GGAAUACCGGGUGCUGUAGGC	2.25	0.98	2.29592	5S_rRNA
GGCGGCGGCGACUCUGGACGCGAGCC	2.25	0.98	2.29592	28S
GUAACUUCGGGAUAAGGAUUG	2.25	0.98	2.29592	28S
UAACUUCGGGAUAAGGAUUGGC	2.25	0.98	2.29592	28S
UCGAUGAAGAACGCAGCUAG	2.25	0.98	2.29592	5.8S
UCUAUUUUGUUGGUUUUCGGAA	2.25	0.98	2.29592	18S
CUGAGAAGACGGUCGAACUUGACUAU	5.07	2.21	2.29412	18S
CGCGAAGCGGGGCUGGGCGCGCGC	2.82	1.23	2.29268	28S
GAGGUGAAAUUCUUGGACCGGCGC	2.82	1.23	2.29268	18S
GGAUGAACCGAACGCCGGGUU	2.82	1.23	2.29268	28S
GUCAGUCGGUCCUGAGAGAUGGG	2.82	1.23	2.29268	28S
GAGAGGUGUAGAAUAAGUGGGAGGCCC	57.12	25	2.2848	28S
CGGCCGCCCCCGGGGAG	16.72	7.35	2.27483	28S
AGGUGAAAUUCUUGGACCGGCG	49.98	22.06	2.26564	18S
AGGAAACUCUGGUGGAGGUCC	6.58	2.94	2.2381	28S
AGCGGUGGAUCACUCGGCUCGUGCG	26.12	11.77	2.2192	5.8S
AUCGAAAGGGAGUCGGG	28.75	12.99	2.21324	28S
GAAACUUAAAGGAAUUGAC	4.89	2.21	2.21267	18S
UCAGUCGGUCCUGAGAGAUGGG	4.89	2.21	2.21267	28S
AGGUGAAAUUCUUGGACCGGC	4.32	1.96	2.20408	18S
GGCGGCGACUCUGGACGCGAG	4.32	1.96	2.20408	28S
AAAUUCUUGGACCGGCG	3.76	1.72	2.18605	18S
CAGCCGACUUAGAACUGGUGCGGACCAG	3.76	1.72	2.18605	28S
AGAACGAAAGUCGGAGGUUCGAAGACGA	6.95	3.19	2.17868	18S
CGAAGGGACGGGCGAUG	6.39	2.94	2.17347	28S
GAGGAAACUCUGGUGGAGGU	6.39	2.94	2.17347	28S
CGCGAAGCGGGGCUGGGC	3.19	1.47	2.17007	28S
CUAGCUGCGAGAAUUAAUG	3.19	1.47	2.17007	5.8S
CUGGACGCGAGCCGGGCCCUU	9.02	4.17	2.16307	28S
CCCGUGGACGGUGUGAGG	11.09	5.15	2.1534	28S
CCGACUUAGAACUGGUGCGGACCAGGGG	5.26	2.45	2.14694	28S
AUCUCGUCUGAUCUCGG	2.63	1.23	2.13821	5S_rRNA
CCCUCGGGAGGGCGCGCGGGUCGG	2.63	1.23	2.13821	28S
CCGGCCGAGGUGGGAUCCCGAG	2.63	1.23	2.13821	28S
CCUCCCCGGGGGAGCGCCGCG	2.63	1.23	2.13821	28S
GAGGUGAAAUUCUUGGACCGGCGCA	2.63	1.23	2.13821	18S
GGAAACUCUGGUGGAGGUC	2.63	1.23	2.13821	28S
GUUCCGAAGGGACGGGCGAUGGC	2.63	1.23	2.13821	28S
CGAAGCGGGGCUGGGCGCG	9.4	4.41	2.13152	28S
CGAAGCGGGGCUGGGCG	4.7	2.21	2.1267	28S
ACUUCGGGAUAAGGAUUGGCUC	2.07	0.98	2.11224	28S
CAUGUGGCGUACGGAAGA	2.07	0.98	2.11224	28S
CGCCGCGUGGGGGCGGCGGCGGGGGGAG	2.07	0.98	2.11224	28S
CGGAGCGCUGAGAAGACG	2.07	0.98	2.11224	18S
CGUACGUAGCAGAGCAGCUCCCUCG	2.07	0.98	2.11224	28S
GGGAACGGGCUUGGCGGAAUCAG	2.07	0.98	2.11224	28S
UCGAUGAAGAACGCAGCUA	2.07	0.98	2.11224	5.8S
CAGUCGAGAGUGGACGGG	6.2	2.94	2.10884	28S
GCGCGAAGCGGGGCUGGGCGCG	4.13	1.96	2.10714	28S
CGCUGAGAAGACGGUCGAACUUGA	11.27	5.39	2.09091	18S
CUUCGGGAUAAGGAUUGGCU	10.71	5.15	2.07961	28S
GGGCGGGUCGCGCCGUCGGGCCCGGG	3.57	1.72	2.07558	28S
AGGGUUCGAUUCCGGAGAGGGAG	5.07	2.45	2.06939	18S
GCGCAAGACGGACCAGAGCGAAA	11.65	5.64	2.0656	18S
ACGUCUCGUCGCGCGCGCGUCCG	62.76	30.4	2.06447	28S
UGAAUUGCAGGACACAUUGAUCAUCGAC	19.73	9.56	2.06381	5.8S
CCAUCUGUGGGAUUAUGACUG	6.58	3.19	2.0627	28S
CGUCUCGUCGCGCGCGCG	6.58	3.19	2.0627	28S
CAGUCGAGAGUGGACGGGAG	3.01	1.47	2.04762	28S
CCACGUCUCGUCGCGCGCGC	3.01	1.47	2.04762	28S
CCCGUGGACGGUGUGAGGCCG	3.01	1.47	2.04762	28S
GCGGUGCGCCGCGACCGGCUCCGGGACG	3.01	1.47	2.04762	28S
UGUGAAUUGCAGGACACAUUGA	3.01	1.47	2.04762	5.8S
GGGUCAGUCGGUCCUGAGAGAUGGG	9.02	4.41	2.04535	28S
AGUGCGCCCCGGGCGGGUCGCGCCGUCG	6.01	2.94	2.04422	28S
UGGACGCGAGCCGGGCCCUU	6.01	2.94	2.04422	28S
CAGUUGAACAUGGGUCAGUCGGUC	4.51	2.21	2.04072	28S
GAGGUGAAAUUCUUGGACCGGCG	20.86	10.3	2.02524	18S
AAGGCCGAAGUGGAGAAGGGUU	3.95	1.96	2.01531	28S
AAGGGUCGGGGCGGCAGGGG	3.95	1.96	2.01531	28S
CGUAGCGGUCCUGACGUGCAAA	3.95	1.96	2.01531	28S
GGUGGAGGUCCGUAGCGGU	3.95	1.96	2.01531	28S
GGUCAGUCGGUCCUGAGAGAUGGGCGA	6.39	3.19	2.00313	28S
UAGGUGAACCUGCGGAAGGAUCAUUA	8.83	4.41	2.00227	18S
GGCGGCGACUCUGGACGCGAGC	4.89	2.45	1.99592	28S
CCACGUCUCGUCGCGCGCGCGUCCG	15.6	7.84	1.9898	28S
UCCCCCGCGGGGGCGCGCCGG	18.04	9.07	1.98897	28S
CGCAAGACGGACCAGAGCGAAAG	2.44	1.23	1.98374	18S
CUCUGGACGCGAGCCGGGCC	2.44	1.23	1.98374	28S
GAACGAAAGUCGGAGGU	2.44	1.23	1.98374	18S
GAAGCUAAGCAGGGUCGGGCCUGG	2.44	1.23	1.98374	5S_rRNA
GCUGGGCGCGCGCCGCGGCUGG	2.44	1.23	1.98374	28S
AACGAGACUCUGGCAUGCUAA	5.83	2.94	1.98299	18S
CUUCGGGAUAAGGAUUGG	5.83	2.94	1.98299	28S
GCGGGUGUUGACGCGAUG	22.36	11.28	1.98227	28S
GACUCUUAGCGGUGGAUCACUCGGCUCG	23.3	11.77	1.97961	5.8S
GAGGAAACUCUGGUGGAGG	9.21	4.66	1.97639	28S
GCUAGCUGCGAGAAUUAAUG	6.76	3.43	1.97085	5.8S
CACGGACAGGAUUGACAGAUUG	3.38	1.72	1.96512	18S
CGGCGGCGGCGACUCUG	3.38	1.72	1.96512	28S
CGUCUCGUCGCGCGCGCGUCCGC	3.38	1.72	1.96512	28S
AGAGGGAGCCUGAGAAACGG	7.7	3.92	1.96429	18S
CACGUCUCGUCGCGCGCGCGUCC	56.56	28.92	1.95574	28S
GUGAAAUUCUUGGACCGGCG	4.32	2.21	1.95475	18S
UGAAUUGCAGGACACAUUGA	16.72	8.58	1.94872	5.8S
UAAACCAUUCGUAGACGACCUGCUUC	5.26	2.7	1.94815	28S
UCGGGGCCACGCGCGCGUCCCCC	5.26	2.7	1.94815	28S
CGGCUGGACGAGGCGCCGCCGCCC	6.2	3.19	1.94357	28S
CUGAGAAGACGGUCGAACUUGACU	7.14	3.68	1.94022	18S
AGUCGAGAGUGGACGGGAG	9.96	5.15	1.93398	28S
CCCCGAAGAGGGGGACGGCGGAG	14.66	7.6	1.92895	28S
ACGUCUCGUCGCGCGC	6.58	3.43	1.91837	28S
CUGGGAAUACCGGGUGCUGUAGGCU	5.64	2.94	1.91837	5S_rRNA
ACGAGAACUUUGAAGGCCGAAGUG	4.7	2.45	1.91837	28S
AGUGCGGUAACGCGACCGAUCCCGGAG	3.76	1.96	1.91837	28S
CCGGAGUGGCGGAGAUGGGCG	3.76	1.96	1.91837	28S
CUAGGAAUAAUGGAAUAGGACCGCG	3.76	1.96	1.91837	18S
GAGGGAGCCUGAGAAACGG	3.76	1.96	1.91837	18S
GCGGGACAUGUGGCGUACGGAAGACCC	3.76	1.96	1.91837	28S
GUAACUUCGGGAUAAGGAUUGGCU	3.76	1.96	1.91837	28S
ACUUCUUAGAGGGACAAGUGG	2.82	1.47	1.91837	18S
AUUCGUGAUGGGGAUCGGG	2.82	1.47	1.91837	18S
CCACCCCACGUCUCGUCGCGCGCGCGU	2.82	1.47	1.91837	28S
CCUCGGGAGGGCGCGCGGGUCGGG	2.82	1.47	1.91837	28S
CGACUCUUAGCGGUGGAUCACUC	2.82	1.47	1.91837	5.8S
AAAAGAACUUUGAAGAGAGAGUU	1.88	0.98	1.91837	28S
AAAAUGGAUGGCGCUGGAGCGUCGGG	1.88	0.98	1.91837	28S
ACGGGCUUGGCGGAAUCAGCGGGG	1.88	0.98	1.91837	28S
AGAAGGGCAAAAGCUCGCUUGAUCUUGA	1.88	0.98	1.91837	28S
AGGGCCGCUGCGGUGAGCCUUGAAGCCUA	1.88	0.98	1.91837	28S
AGGGUUCGAUUCCGGAGAGGGA	1.88	0.98	1.91837	18S
AUACAUGCCGACGGGCGCUGACCC	1.88	0.98	1.91837	18S
CCACUAAUAGGGAACGUGAGCUGGG	1.88	0.98	1.91837	28S
CGUAGCGGUCCUGACGUGCAAAU	1.88	0.98	1.91837	28S
CUAAACCAUUCGUAGACGACCUGCU	1.88	0.98	1.91837	28S
UUGACUCUAGUCUGGCACGGUG	1.88	0.98	1.91837	28S
CCACGUCUCGUCGCGCGCGCG	13.15	6.86	1.91691	28S
CGUAACUUCGGGAUAAGGAUUGGCU	35.7	18.63	1.91626	28S
AGGGAACGGGCUUGGCGGAAU	20.48	10.79	1.89805	28S
GGAACGGGCUUGGCGGAAUC	13.9	7.35	1.89116	28S
CGAUCGAAAGGGAGUCGGGU	6.95	3.68	1.88859	28S
CGAACGAGACUCUGGCAUGCUAA	5.07	2.7	1.87778	18S
CCACUAAUAGGGAACGUGAGCUG	10.52	5.64	1.86525	28S
GCAGUUGAACAUGGGUCAGUCGGU	3.19	1.72	1.85465	28S
AUCUCGUCUGAUCUCGGA	5.45	2.94	1.85374	5S_rRNA
CCGAAGGGACGGGCGAUGG	5.45	2.94	1.85374	28S
UGCGGAAGGAUCAUUA	21.8	11.77	1.85217	18S
AGGGAAGUCGGCAAGCCGGA	4.51	2.45	1.84082	28S
CUUAGAACUGGUGCGGA	4.51	2.45	1.84082	28S
GCGGCGUCCGGUGAGCUCUCGCUGG	4.51	2.45	1.84082	28S
UUCGGGAUAAGGAUUGGCU	6.76	3.68	1.83696	28S
ACUCUAGUCUGGCACGGUGAAGAG	2.25	1.23	1.82927	28S
CACCCCACGUCUCGUCGCGCGCGCGUCC	2.25	1.23	1.82927	28S
CAUGUUGGAACAAUGUAGGUAAGGG	2.25	1.23	1.82927	28S
CCGCGACCGGCUCCGGGACGGCU	2.25	1.23	1.82927	28S
CUGGACGAGGCGCCGCCGCCC	2.25	1.23	1.82927	28S
GCGGUGGAUCACUCGGCUCGUG	2.25	1.23	1.82927	5.8S
UGAACAGCAGUUGAACAU	2.25	1.23	1.82927	28S
CGUAACUUCGGGAUAAGGAUUGG	19.73	10.79	1.82854	28S
UUAGUGACGCGCAUGAAUGGAUG	5.83	3.19	1.82759	28S
CCACCCCACGUCUCGUCG	3.57	1.96	1.82143	28S
GAGCGCUGAGAAGACGGUCGAACUUGA	3.57	1.96	1.82143	18S
GCGCAAGACGGACCAGAGCGA	17.85	9.81	1.81957	18S
CCCCGAAGAGGGGGACGGCGGA	22.74	12.5	1.8192	28S
ACAAUGUAGGUAAGGGAAGUCG	20.48	11.28	1.8156	28S
GCGCUGCGGGAUGAACCGAACGCCGGGUU	4.89	2.7	1.81111	28S
CCCACGUCUCGUCGCGCGCG	15.41	8.58	1.79604	28S
GAGGAAACUCUGGUGGAGGUCCG	10.52	5.88	1.78912	28S
AUUCCGGAGAGGGAGCCUGAGAAACGG	2.63	1.47	1.78912	18S
CAGGCGGCGGAGGGGCCGCGG	2.63	1.47	1.78912	28S
CCCGGCCGGGGGGCGGGCGCCGG	2.63	1.47	1.78912	18S
CGGCGGCGGCGGCGACUCUGGACGCGA	2.63	1.47	1.78912	28S
CUCGUAGUUGGAUCUUGGGA	2.63	1.47	1.78912	18S
GAGAAGCCGGCGGGAGCCCCG	2.63	1.47	1.78912	28S
ACGAACGAGACUCUGGCAUGCUAACUA	3.95	2.21	1.78733	18S
AGUGCGGUAACGCGACCGAUCCCGGAGA	3.95	2.21	1.78733	28S
CUAAUUAGUGACGCGCAUGAAUGGAUG	3.95	2.21	1.78733	28S
GGACAGGAUUGACAGAUUGAUAGCU	3.95	2.21	1.78733	18S
ACCCCACGUCUCGUCGCGCGCG	11.27	6.37	1.76923	28S
GAACAUGGGUCAGUCGGUC	22.55	12.75	1.76863	28S
UCCCGGGGCUACGCCUGUCUGAGCGUCGCU	8.64	4.9	1.76327	5.8S
GCGGUGGAUCACUCGGCUCGUGCGUC	4.32	2.45	1.76327	5.8S
UUAAAGGAAUUGACGGAAGGGCA	4.32	2.45	1.76327	18S
CGACUCUUAGCGGUGGAUCACUCGGCU	15.97	9.07	1.76075	5.8S
CCCCACGUCUCGUCGCGCGCG	16.35	9.31	1.75618	28S
CAAUGUAGGUAAGGGAAGUCGGCA	3.01	1.72	1.75	28S
CCAGGAGUGGAGCCUGCGGCUUAAUU	3.01	1.72	1.75	18S
UAGUGACGCGCAUGAAUGGAUG	3.01	1.72	1.75	28S
CUGCGGAAGGAUCAUUA	12.4	7.11	1.74402	18S
GGCGGCGACUCUGGACGCGAGCCGGGCC	18.79	10.79	1.74143	28S
CGGCGGGGGGAGAAGGGUCGGGG	33.63	19.36	1.73709	28S
AGGAAACUCUGGUGGAGGUCCG	66.71	38.48	1.73363	28S
AACCAUUCGUAGACGACCUGCUUC	15.22	8.82	1.72562	28S
CCCGAAGAGGGGGACGGCGGA	6.76	3.92	1.72449	28S
AGUGCGCCCCGGGCGGGUCGCGCCGUCGG	5.07	2.94	1.72449	28S
AGUGCGGUAACGCGACCGAUCCCGGA	5.07	2.94	1.72449	28S
AAUUGCAGGACACAUUG	3.38	1.96	1.72449	5.8S
GAGGAAACUCUGGUGGAGGUC	10.9	6.37	1.71115	28S
CGCCGCGGCUGGACGAGG	5.45	3.19	1.70846	28S
ACCCCACGUCUCGUCGCGCGCGCGUC	5.83	3.43	1.69971	28S
CGCGAAGCGGGGCUGGGCGC	5.83	3.43	1.69971	28S
CGGGAUAAGGAUUGGCU	9.96	5.88	1.69388	28S
CGCCUGUCUGAGCGUCGCUU	19.92	11.77	1.69244	5.8S
CCCCGAAGAGGGGGACGGCGGAGCG	4.13	2.45	1.68571	28S
UGAAUUGCAGGACACAUUGAUCAUCGA	23.11	13.73	1.68318	5.8S
AUUAGUGACGCGCAUGAAUG	2.07	1.23	1.68293	28S
CAUUAAUCAAGAACGAAAGUCGGAGG	2.07	1.23	1.68293	18S
CCCACUAAUAGGGAACGUGAGCUG	2.07	1.23	1.68293	28S
CGGCGGGGGGAGAAGGG	2.07	1.23	1.68293	28S
GAGAAGGGUCGGGGCG	2.07	1.23	1.68293	28S
GCGCGGGACAUGUGGCGUACGGA	2.07	1.23	1.68293	28S
GGCGCAAGACGGACCAGAGC	2.07	1.23	1.68293	18S
GGUGGAGGUCCGUAGCG	2.07	1.23	1.68293	28S
GGUGUAGAAUAAGUGGGAGGCCCCCG	2.07	1.23	1.68293	28S
UCCGGAGUGGCGGAGAUGGGCGCCG	2.07	1.23	1.68293	28S
UUGGAACAAUGUAGGUAAGGG	2.07	1.23	1.68293	28S
AUUAGUGACGCGCAUGAAUGG	9.02	5.39	1.67347	28S
AAUGAUUAGAGGUCUUGGGGC	4.51	2.7	1.67037	28S
UCAGUCGGUCCUGAGAGAUGG	4.51	2.7	1.67037	28S
GCGGGACAUGUGGCGUA	6.95	4.17	1.66667	28S
CCCACGUCUCGUCGCGCGCGCGU	4.89	2.94	1.66327	28S
AGGGAAGUCGGCAAGCCGG	7.33	4.41	1.66213	28S
AAAAUGGAUGGCGCUGGAGC	2.44	1.47	1.65986	28S
CAGUGCGGUAACGCGACCGAUCCCGGA	2.44	1.47	1.65986	28S
GACACAUUGAUCAUCGACA	2.44	1.47	1.65986	5.8S
GAGGUGAAAUUCUUGGACCGG	2.44	1.47	1.65986	18S
GAGGUGUAGAAUAAGUGGGAGGCCCCCGG	2.44	1.47	1.65986	28S
GGCGCAAGACGGACCAGAGCGAAAG	2.44	1.47	1.65986	18S
GUAACUUCGGGAUAAGGAUUGGC	2.44	1.47	1.65986	28S
UAGCGGUGGAUCACUCGGCUCGUGCG	2.44	1.47	1.65986	5.8S
UUUUGAUCCUUCGAUGUCGGC	2.44	1.47	1.65986	28S
UGAAUUGCAGGACACAUUG	40.21	24.27	1.65678	5.8S
CGAAGGGACGGGCGAUGGCCU	15.78	9.56	1.65063	28S
UGCGCCCCGGGCGGGUCGCGCCGUCGG	5.26	3.19	1.6489	28S
AACAGCAGUUGAACAUGGGUCAGU	2.82	1.72	1.63953	28S
AGAAUUAAUGUGAAUUGCAGGACACA	2.82	1.72	1.63953	5.8S
AUGAAGCGCGGGUAAACGG	2.82	1.72	1.63953	28S
CGGGCGGGUCGCGCCGUCGGG	2.82	1.72	1.63953	28S
GGACAUGUGGCGUACGGAAG	2.82	1.72	1.63953	28S
GCGCAAGACGGACCAGAGCGAA	14.84	9.07	1.63616	18S
ACAAUGUAGGUAAGGGAA	6.01	3.68	1.63315	28S
CGCAAGACGGACCAGAGCGAAA	6.01	3.68	1.63315	18S
GCUAGCUGCGAGAAUU	3.19	1.96	1.62755	5.8S
ACUCUGGACGCGAGCCGGGCC	3.57	2.21	1.61538	28S
AGGUGAAAUUCUUGGACCGGCGCAA	3.57	2.21	1.61538	18S
CCAAGGGAACGGGCUUGGCG	3.95	2.45	1.61224	28S
UCCGGAGAGGGAGCCUGAGAAACGG	8.27	5.15	1.60583	18S
UGAAUUGCAGGACACAUUGAUCAU	8.64	5.39	1.60297	5.8S
AGCAGUUGAACAUGGGUCAGUCGGU	4.32	2.7	1.6	28S
AUUGCAGGACACAUUGAUCAUCGACA	4.32	2.7	1.6	5.8S
AGGAAACUCUGGUGGAGGU	18.79	11.77	1.59643	28S
AACGAGACUCUGGCAUGCUAACUA	5.07	3.19	1.58934	18S
GGUCAGUCGGUCCUGAGAGAUGGGC	6.2	3.92	1.58163	28S
GGUCAGUCGGUCCUGAGAGAUGG	15.03	9.56	1.57218	28S
AAUUGCAGGACACAUUGAUCAUCG	45.28	28.92	1.5657	5.8S
ACUCUAGUCUGGCACGGUG	8.83	5.64	1.5656	28S
CCCCACGUCUCGUCGCGCGCGCG	14.09	9.07	1.55347	28S
AGGGGGCGGGCUCCGGCG	17.85	11.52	1.54948	28S
GGGAACGGGCUUGGCGGAAU	21.98	14.22	1.54571	28S
CAGUUGAACAUGGGUCAGUCGGUCCUG	3.01	1.96	1.53571	28S
CCCCGGCCGGGGGGCGGGCGC	3.01	1.96	1.53571	18S
GCCGACUUAGAACUGGUGCGG	3.76	2.45	1.53469	28S
CCCGUGGACGGUGUGAGGCC	4.51	2.94	1.53401	28S
GAGGUGUAGAAUAAGUGGGAGGCCCCCG	21.05	13.73	1.53314	28S
AACGAAAGUCGGAGGUUCGAAGA	4.89	3.19	1.53292	18S
AACUGGCGCUGCGGGAUG	2.25	1.47	1.53061	28S
CUUUAACGAGGAUCCAUUGGAGGGC	2.25	1.47	1.53061	18S
GAGACAUGAGAGGUGUAGAAU	2.25	1.47	1.53061	28S
GGUGGAUCACUCGGCUCGUGCGUC	2.25	1.47	1.53061	5.8S
ACCAAGGAGUCUAACACGUGCG	4.13	2.7	1.52963	28S
CCCCGGCCGGGGGGCGGGCGCCG	4.13	2.7	1.52963	18S
AACGAAAGUCGGAGGUUCGAAGAC	3.38	2.21	1.52941	18S
AAUACCGGGUGCUGUAGGCUU	3.38	2.21	1.52941	5S_rRNA
AUCGAGGCCCAGCCCGUGGACGGUG	3.38	2.21	1.52941	28S
CCUGGCGGAGCGCUGAGAAGACG	3.38	2.21	1.52941	18S
AGCUAGCUGCGAGAAUUAAUG	2.63	1.72	1.52907	5.8S
CGCCUGGGAAUACCGGGUGCUGUAGGCUU	2.63	1.72	1.52907	5S_rRNA
GCGCAAGACGGACCAGAGCGAAAGCAUU	2.63	1.72	1.52907	18S
UCAUUGUGAAGCAGAAUUC	2.63	1.72	1.52907	28S
CCAAGCGUUGGAUUGUUC	1.88	1.23	1.52846	28S
CGCCGCGUGGGGGCGGCGGCGGGG	1.88	1.23	1.52846	28S
CGGCGGAGGGGCCGCGGGCCGGUC	1.88	1.23	1.52846	28S
CUAAUAGGGAACGUGAGCU	1.88	1.23	1.52846	28S
GAACGAAAGUCGGAGGUUCGAAGACGAUC	1.88	1.23	1.52846	18S
GAGGUGAAAUUCUUGGACCGGC	1.88	1.23	1.52846	18S
GCGGCGGCGGCGACUCUG	1.88	1.23	1.52846	28S
GCUCUAAGGGCUGGGUCGGUCG	1.88	1.23	1.52846	28S
UAAAGGAAUUGACGGAAGGG	1.88	1.23	1.52846	18S
AAUUGCAGGACACAUUGAUCAUCGA	37.02	24.27	1.52534	5.8S
CGUAACUUCGGGAUAAGGAUUGGC	9.58	6.37	1.50392	28S
CCCGGAGGGGGCGGGCUCCGGCG	7.7	5.15	1.49515	28S
CCCCGCGGGGGCGCGCCGG	6.2	4.17	1.48681	28S
GGAAUACCGGGUGCUGUAGGCU	6.2	4.17	1.48681	5S_rRNA
UGAAUUGCAGGACACAUUGAUCAUC	10.15	6.86	1.47959	5.8S
AGAACGAAAGUCGGAGG	9.77	6.62	1.47583	18S
CGACUCUUAGCGGUGGAUCACUCGG	292.94	199.29	1.46992	5.8S
ACGAACGAGACUCUGGCAUGCUAA	4.32	2.94	1.46939	18S
CGCAAGACGGACCAGAGCGAAAGCA	4.32	2.94	1.46939	18S
CGGCGGCGUCCGGUGAGCUCUCGCUG	4.32	2.94	1.46939	28S
UAGGAAUAAUGGAAUAGGACCGCG	4.32	2.94	1.46939	18S
ACCCCACGUCUCGUCGCGCGCGCG	8.27	5.64	1.46631	28S
AAUUGCAGGACACAUUGAU	7.89	5.39	1.46382	5.8S
ACGAGAACUUUGAAGGCCGAAGUGGA	3.95	2.7	1.46296	28S
CGCAAGACGGACCAGAGCGA	7.52	5.15	1.46019	18S
CAAUGUAGGUAAGGGAAGUCG	12.78	8.82	1.44898	28S
CAGGACGGUGGCCAUGGAAGUCGG	3.19	2.21	1.44344	28S
CGGACAGGAUUGACAGAUUGA	6.01	4.17	1.44125	18S
AGAAGACCCUGUUGAGCUUGACUC	8.46	5.88	1.43878	28S
ACGAACGAGACUCUGGCAUGCUAACU	2.82	1.96	1.43878	18S
CAGUUGAACAUGGGUCAGUCGGUCC	2.82	1.96	1.43878	28S
CCGGCGCAAGACGGACCAGAGCGAAAGCAU	2.82	1.96	1.43878	18S
GGCGGAGCGCUGAGAAGACG	2.82	1.96	1.43878	18S
GGAACGGGCUUGGCGGAAU	19.73	13.73	1.437	28S
CGAUGAAGAACGCAGCUAGCUG	5.26	3.68	1.42935	5.8S
CGUAGCGGUCCUGACGUG	4.89	3.43	1.42566	28S
AGGGAACGGGCUUGGCGGA	37.39	26.23	1.42547	28S
AAAAUGGAUGGCGCUGG	2.44	1.72	1.4186	28S
AACAGCAGUUGAACAUG	2.44	1.72	1.4186	28S
AACGAGACUCUGGCAUGCUA	2.44	1.72	1.4186	18S
UCCCCCGCGGGGGCGCGCCGGCGU	6.95	4.9	1.41837	28S
CGGCGGAGGGGCCGCGGGCCGGU	4.51	3.19	1.41379	28S
AAGAAGACCCUGUUGAGCUU	2.07	1.47	1.40816	28S
AUCUCGUCUGAUCUCGGAAGCU	2.07	1.47	1.40816	5S_rRNA
CGCACGUGUUAGGACCCGAAAGAUGGUG	2.07	1.47	1.40816	28S
CGGCAGUCGAGAGUGGACGG	2.07	1.47	1.40816	28S
CUUAGAUGUCCGGGGCUGCACGCGCG	2.07	1.47	1.40816	18S
GCUAGCUGCGAGAAUUAAU	2.07	1.47	1.40816	5.8S
GGGGUUUCGUACGUAGCAGAGCAG	2.07	1.47	1.40816	28S
UUUCGUACGUAGCAGAGCAGCU	2.07	1.47	1.40816	28S
GCGCAAGACGGACCAGAGC	6.2	4.41	1.4059	18S
AACUUAAAGGAAUUGACGGAAGGGCA	4.13	2.94	1.40476	18S
CCCACGUCUCGUCGCGCGCGCGUCCG	11.65	8.33	1.39856	28S
CGGAGGUUCGAAGACGA	61.26	43.88	1.39608	18S
AAGCAUCGCGAAGGCCCG	3.76	2.7	1.39259	28S
CAGAACUGGCGCUGCGGGAUG	3.76	2.7	1.39259	28S
CCGGCGGCGGCGGCGAC	3.76	2.7	1.39259	28S
GAACAAUGUAGGUAAGGGAAGUCG	20.11	14.46	1.39073	28S
UGAAUUGCAGGACACAUU	8.83	6.37	1.38619	5.8S
GAGGGGGCGGGCUCCGGCG	6.76	4.9	1.37959	28S
CCCGGAGGGGGCGGGCUCCGGCGGG	3.38	2.45	1.37959	28S
CGACUCUUAGCGGUGG	3.38	2.45	1.37959	5.8S
GGCGCGAAGCGGGGCUGGGCGCG	3.38	2.45	1.37959	28S
GGGUUUCGUACGUAGCAGAG	3.38	2.45	1.37959	28S
CGGUGGAUCACUCGGCUCGU	14.84	10.79	1.37535	5.8S
CCUGCGGAAGGAUCAUUA	8.08	5.88	1.37415	18S
ACGUCUCGUCGCGCGCGCG	6.39	4.66	1.37124	28S
AAUUGCAGGACACAUUGAUCAUCGACA	28.56	20.84	1.37044	5.8S
CCCGUGGACGGUGUGAGGCCGGU	4.7	3.43	1.37026	28S
CGUCUCGUCGCGCGCGCGUCCG	22.17	16.18	1.37021	28S
AAACGAGAACUUUGAAGGCCGAAGUGGA	3.01	2.21	1.36199	28S
CCCGGCCGGGGGGCGGGCGCCG	3.01	2.21	1.36199	18S
CCGGCAGUCGAGAGUGGACGGGAG	3.01	2.21	1.36199	28S
GGCAGUCGAGAGUGGACGGG	3.01	2.21	1.36199	28S
GCAGUCGAGAGUGGACGGGA	10.33	7.6	1.35921	28S
GGCGGCGACUCUGGACGCGAGCCGGGCCC	4.32	3.19	1.35423	28S
UUAGUGACGCGCAUGAAUGGAU	4.32	3.19	1.35423	28S
AUCUCGUCUGAUCUCGGAA	3.95	2.94	1.34354	5S_rRNA
AGGGAACGGGCUUGGCGGAA	39.84	29.66	1.34322	28S
ACCCCACGUCUCGUCGCGCGCGCGUCCG	10.52	7.84	1.34184	28S
CUAGAGGAAGUAAAAGUCGUA	2.63	1.96	1.34184	18S
GACAGGAUUGACAGAUUG	2.63	1.96	1.34184	18S
CCGGCGGCGUCCGGUGAGCUCUCGCUGG	35.51	26.47	1.34152	28S
CGACUCUGGACGCGAGCCG	7.52	5.64	1.33333	28S
CUUGGAAAGCGUCGCGG	4.89	3.68	1.3288	28S
CUAAGGCGAGCUCAGGGAGG	9.4	7.11	1.32208	28S
GUCUCGUCGCGCGCGCGUCCGCU	5.83	4.41	1.322	28S
AGGUGAAAUUCUUGGACCGGCGC	11.65	8.82	1.32086	18S
UAGUGACGCGCAUGAAUGG	4.51	3.43	1.31487	28S
AGGUGUAGAAUAAGUGGGAGGCCCCC	13.15	10.05	1.30846	28S
ACGGACCAAGGAGUCUAACACGUGCGCGA	2.25	1.72	1.30814	28S
AGCAGGACGGUGGCCAUGGAAGUCG	2.25	1.72	1.30814	28S
CGACUCUGGACGCGAGCCGGGCC	2.25	1.72	1.30814	28S
CGCGGGUAAACGGCGGGAGUAACUA	2.25	1.72	1.30814	28S
GCGGCGUCCGGUGAGCUCUCGCUGGC	2.25	1.72	1.30814	28S
GGCGCAAGACGGACCAGAGCGAAAGCA	2.25	1.72	1.30814	18S
GUGGAGGUCCGUAGCGGUCCUGACGUGCA	2.25	1.72	1.30814	28S
CUCUGGACGCGAGCCGG	5.45	4.17	1.30695	28S
UAGAGGGACAAGUGGCGUU	5.45	4.17	1.30695	18S
CGGGUGUUGACGCGAUG	22.74	17.4	1.3069	28S
GGAAUACCGGGUGCUGUAGGCUU	7.33	5.64	1.29965	5S_rRNA
GGCUACGCCUGUCUGAGCGUCG	4.13	3.19	1.29467	5.8S
GCGGAGGGGCCGCGGGCCGG	6.01	4.66	1.2897	28S
CGCUGAGAAGACGGUCGAACUUGACUA	16.72	12.99	1.28714	18S
AUAAUGGAAUAGGACCGCGGUU	15.78	12.26	1.28711	18S
ACAGCAGUUGAACAUGGG	13.53	10.54	1.28368	28S
CGAACGAGACUCUGGCAUGCUAACU	3.76	2.94	1.27891	18S
AAGCGGGGCUGGGCGCG	1.88	1.47	1.27891	28S
CAGCCCUCGACACAAGGGUUUGU	1.88	1.47	1.27891	28S
CUGCGGGAUGAACCGAACGCCGGGUU	1.88	1.47	1.27891	28S
GAGGAAACUCUGGUGGAGGUCCGUAG	1.88	1.47	1.27891	28S
GGGACAUGUGGCGUACGGA	1.88	1.47	1.27891	28S
CCCCGAAGAGGGGGACGGCGGAGC	4.7	3.68	1.27717	28S
AUUGCAGGACACAUUGAUCAUCGA	2.82	2.21	1.27602	5.8S
GCAGCCGACUUAGAACUGGUGCGGACC	2.82	2.21	1.27602	28S
GGGUUCCAUGUGAACAGCAGUUGAACA	2.82	2.21	1.27602	28S
AAUUGCAGGACACAUUGAUCAU	7.7	6.13	1.25612	5.8S
GCCGCCGGUGAAAUACCACUACU	6.76	5.39	1.25417	28S
CCCCGGAGGGGGCGGGCUCCGGCGGG	3.38	2.7	1.25185	28S
UGAAUUGCAGGACACAU	3.38	2.7	1.25185	5.8S
CGCGACCUCAGAUCAGACGUGGCGACCCGC	14.66	11.77	1.24554	28S
CAAUGUAGGUAAGGGAAGUCGGCAA	2.44	1.96	1.2449	28S
CCACUAAUAGGGAACGUGAGCU	2.44	1.96	1.2449	28S
CCGACUUAGAACUGGUGCGGACCA	2.44	1.96	1.2449	28S
CGUCUGAUCUCGGAAGCUAAGCAGG	2.44	1.96	1.2449	5S_rRNA
AAUUGCAGGACACAUUGAUCAUCGAC	43.41	35.05	1.23852	5.8S
CGACUCUUAGCGGUGGAUCACUCG	55.43	44.86	1.23562	5.8S
AUCCUUCGAUGUCGGCU	3.01	2.45	1.22857	28S
GAACGAAAGUCGGAGG	3.01	2.45	1.22857	18S
GGGCUACGCCUGUCUGAGCGUCGCU	3.01	2.45	1.22857	5.8S
AGGAAACUCUGGUGGAGGUC	31.19	25.49	1.22362	28S
AACUGGUGCGGACCAGGGGAAUCCGACUG	8.08	6.62	1.22054	28S
UGAAUUGCAGGACACAUUGAUCAUCG	77.6	63.73	1.21764	5.8S
AGCGCUGAGAAGACGGUCGAACUUGACU	3.57	2.94	1.21429	18S
GCGCGCCGCGGCUGGACGAG	3.57	2.94	1.21429	28S
CCGGACACGGACAGGAUUGA	4.13	3.43	1.20408	18S
GCAGGACACAUUGAUCAUCGA	4.13	3.43	1.20408	5.8S
AACGGGCUUGGCGGAAUCAGCGGGGA	2.07	1.72	1.20349	28S
ACGAGACUCUGGCAUGCUAACU	2.07	1.72	1.20349	18S
AGGCGGCGGAGGGGCCGCGGGCCGG	2.07	1.72	1.20349	28S
CUCCGGCGGGUGCGGGGGUGGGCGGG	2.07	1.72	1.20349	28S
GGGAGCCUGAGAAACGG	8.83	7.35	1.20136	18S
GCGCUGAGAAGACGGUCGAACUUGA	4.7	3.92	1.19898	18S
UCUCCCCCGCGGGGGCGCGCCGGCGU	4.7	3.92	1.19898	28S
GCUAAACCAUUCGUAGACGACCUGCUUC	7.33	6.13	1.19576	28S
AGAAGCCGGCGGGAGCCCCG	2.63	2.21	1.19005	28S
AGAAGGGUCGGGGCGGCAGGGG	2.63	2.21	1.19005	28S
UCUUAGAGGGACAAGUGGCGUU	2.63	2.21	1.19005	18S
UAAAGGAAUUGACGGAAGGGCA	6.95	5.88	1.18197	18S
CGCCUGUCUGAGCGUCGCU	102.78	87.02	1.18111	5.8S
CGCGGGACAUGUGGCGUA	18.23	15.44	1.1807	28S
CGUAGUUGGAUCUUGGGA	3.76	3.19	1.17868	18S
GCGGCGACUCUGGACGCGAGCCGGGCCCU	52.99	45.1	1.17494	28S
AACAAUGUAGGUAAGGGAAGUCG	14.09	12.01	1.17319	28S
AAUUGCAGGACACAUUGAUCA	4.89	4.17	1.17266	5.8S
CCCUCGGGAGGGCGCGCGGGUCGGGG	7.14	6.13	1.16476	28S
ACGUCUCGUCGCGCGCGCGUC	32.51	27.94	1.16356	28S
CGAGAACUUUGAAGGCCGAAGUGGAGA	8.27	7.11	1.16315	28S
GAGGAAACUCUGGUGGAGGUCCGU	45.1	38.97	1.1573	28S
AGAACUUUGAAGGCCGAAGUGG	3.95	3.43	1.1516	28S
AAACUUAAAGGAAUUGACGGAAGGG	2.82	2.45	1.15102	18S
CAAUGUAGGUAAGGGAA	2.82	2.45	1.15102	28S
CCGGCGGCGUCCGGUGAGCUCUCGC	2.82	2.45	1.15102	28S
UGGCGGAGCGCUGAGAAGACG	2.82	2.45	1.15102	18S
AUCGAAAGGGAGUCGGGU	9.02	7.84	1.15051	28S
GAGGAAACUCUGGUGGAGGUCC	4.51	3.92	1.15051	28S
UGAAUUGCAGGACACAUUGAUC	6.2	5.39	1.15028	5.8S
AAAUUCUUGGACCGGCGCA	5.07	4.41	1.14966	18S
CUGGGGGCGGGGAGCGGU	5.07	4.41	1.14966	28S
AAAAUGGAUGGCGCUGGAGCG	3.38	2.94	1.14966	28S
AGCGCUGAGAAGACGGUCGAACUUGAC	2.25	1.96	1.14796	18S
AGUACUUGGAUGGGAGACCGC	2.25	1.96	1.14796	5S_rRNA
GAACGAAAGUCGGAGGUUCGAAGACGAUCA	2.25	1.96	1.14796	18S
GCCGACUUAGAACUGGUGCGGACCA	2.25	1.96	1.14796	28S
GGAUGAACCGAACGCCGGGU	2.25	1.96	1.14796	28S
UAAAGGAAUUGACGGAAGGGCAC	2.25	1.96	1.14796	18S
ACGUCUCGUCGCGCGCGCGU	69.34	60.79	1.14065	28S
CAGUUAAAAAGCUCGUAGUUGGA	19.54	17.16	1.13869	18S
CGGGGCUACGCCUGUCUGAGCGUCGCUU	28.37	25	1.1348	5.8S
AAAUUCUUGGACCGGCGCAAGACG	5.83	5.15	1.13204	18S
GCGGGGGGAGAAGGGUCGGGG	5.83	5.15	1.13204	28S
ACCAUUCGUAGACGACCUGCUUC	7.7	6.86	1.12245	28S
UAGUGACGCGCAUGAAUGGAU	4.13	3.68	1.12228	28S
CCGGACACGGACAGGAUUG	3.57	3.19	1.11912	18S
GCCUGGUUAGUACUUGGAUGG	3.57	3.19	1.11912	5S_rRNA
UCGGAGGUUCGAAGACGA	75.73	67.9	1.11532	18S
CAAGGAGUCUAACACGUGCG	6.01	5.39	1.11503	28S
GUUUCGUACGUAGCAGAGCAG	3.01	2.7	1.11481	28S
CGGCGGAGGGGCCGCGGGCCGG	5.45	4.9	1.11224	28S
CCUUGGAAAGCGUCGCGG	10.33	9.31	1.10956	28S
AAUUGCAGGACACAUUGAUCAUCGACAC	12.78	11.52	1.10938	5.8S
AAUUGCAGGACACAUUGAUCAUC	9.77	8.82	1.10771	5.8S
ACUUCUUAGAGGGACAAGUG	2.44	2.21	1.10407	18S
AGAAGGGUCGGGGCGGCAGGG	2.44	2.21	1.10407	28S
AUAAUGGAAUAGGACCGCGGU	2.44	2.21	1.10407	18S
CAGUUGAACAUGGGUCAGUCGGUCCU	2.44	2.21	1.10407	28S
CUGGGAAUACCGGGUGCU	2.44	2.21	1.10407	5S_rRNA
GUCGGUCGGGCUGGGGCGCGAAGCGG	2.44	2.21	1.10407	28S
CGCUGAGAAGACGGUCGAACUUGACU	6.2	5.64	1.09929	18S
CGCUGAGAAGACGGUCGAACUUGACUAU	6.2	5.64	1.09929	18S
CCCCGAAGAGGGGGACGGCGGAGCGA	3.76	3.43	1.09621	28S
AAGCUAAGCAGGGUCGGGCCUGG	1.88	1.72	1.09302	5S_rRNA
CUGGUGCGGACCAGGGG	1.88	1.72	1.09302	28S
ACGUCUCGUCGCGCGCG	24.05	22.06	1.09021	28S
AAAGUCGGAGGUUCGAAG	8.27	7.6	1.08816	18S
GGCGGCGGCGACUCUGGACGCGAGCCGG	5.07	4.66	1.08798	28S
ACGAGAACUUUGAAGGCCGAAGUGG	5.83	5.39	1.08163	28S
CGGCGACUCUGGACGCGAGCCGGGCCCU	27.43	25.49	1.07611	28S
AACGAAAGUCGGAGGUUC	2.63	2.45	1.07347	18S
AAUUGCAGGACACAUUGA	2.63	2.45	1.07347	5.8S
AGGUCCGUAGCGGUCCUGACGUGCA	2.63	2.45	1.07347	28S
AUGGGUCAGUCGGUCCUGAGAGAUGG	2.63	2.45	1.07347	28S
AUUAAUCAAGAACGAAAGUCGGAGG	2.63	2.45	1.07347	18S
GAAGGGUCGGGGCGGCAG	2.63	2.45	1.07347	28S
GGCCCUGGCGGAGCGCUGAGAAGAC	2.63	2.45	1.07347	18S
AGGACCCGAAAGAUGGUG	3.95	3.68	1.07337	28S
CCGUAACUUCGGGAUAAGGAUUG	3.95	3.68	1.07337	28S
GGCGCAAGACGGACCAGAGCGAAAGCAU	3.95	3.68	1.07337	18S
GGCGGCGGCGACUCUGGACGCGAGCCGGGC	3.95	3.68	1.07337	28S
AGGGAGCCUGAGAAACGG	8.08	7.6	1.06316	18S
CUCGUCUGAUCUCGGAAGCUAAGCAGG	11.46	10.79	1.06209	5S_rRNA
ACUGAACGCCUCUAAGUCAGAA	3.38	3.19	1.05956	28S
UCGGGAUAAGGAUUGGCU	3.38	3.19	1.05956	28S
AAGCGCGGGUAAACGGCGGG	2.07	1.96	1.05612	28S
ACGAACGAGACUCUGGCAUGCUAACUAG	2.07	1.96	1.05612	18S
AUCUCGGAAGCUAAGCAGGGUCG	2.07	1.96	1.05612	5S_rRNA
CCAAGCGUUGGAUUGUUCACCCA	2.07	1.96	1.05612	28S
CUAGAGGUGAAAUUCUUGGACCGGCGCA	2.07	1.96	1.05612	18S
GAACGAAAGUCGGAGGUUCG	2.07	1.96	1.05612	18S
GCCGGCGGCGGCGGCGAC	2.07	1.96	1.05612	28S
UAAUCAAGAACGAAAGUCGGAG	2.07	1.96	1.05612	18S
UCCGAAGGGACGGGCGAUGG	2.07	1.96	1.05612	28S
GGGACAUGUGGCGUACGGAAG	35.33	33.58	1.05211	28S
UAAUUAGUGACGCGCAUGAAUG	4.89	4.66	1.04936	28S
GGGAUAACUGGCUUGUGGCG	2.82	2.7	1.04444	28S
AAGGAAUUGACGGAAGGGCA	26.31	25.25	1.04198	18S
AAGGGUCGGGGCGGCAGGG	3.57	3.43	1.04082	28S
CAAAGCAUCGCGAAGGCCCG	5.83	5.64	1.03369	28S
AGUGCGCCCCGGGCGGGUCGCGCCGUCGGG	8.08	7.84	1.03061	28S
CCGGCAGUCGAGAGUGGACGG	3.01	2.94	1.02381	28S
GCAGGACACAUUGAUCAUCG	4.51	4.41	1.02268	5.8S
CCACCAGGAGUGGAGCCUGCGGCUU	6.01	5.88	1.02211	18S
AAUGAAGCGCGGGUAAACGG	6.76	6.62	1.02115	28S
GAACAUGGGUCAGUCGGUCC	6.76	6.62	1.02115	28S
CGCCCAGGCGGAACGAUACGG	2.25	2.21	1.0181	28S
UUCGGGAUAAGGAUUGGC	2.25	2.21	1.0181	28S
CGGCGGCGUCCGGUGAGCUCUCGCUGG	23.86	23.53	1.01402	28S
AGGGGCGAAAGACUAAUCG	7.7	7.6	1.01316	28S
AGAUCUUGGUGGUAGUAGCA	4.7	4.66	1.00858	28S
GGCGGGGCGGACUGUCCCCAG	3.95	3.92	1.00765	28S
CCCACGUCUCGUCGCGCGCGCG	10.33	10.3	1.00291	28S
CUAAGGCGAGCUCAGGGAG	9.58	9.56	1.00209	28S
GCAGUCGAGAGUGGACGG	5.64	5.64	1	28S
ACGAGAACUUUGAAGGCCGA	3.19	3.19	1	28S
CGAACGAGACUCUGGCAUGCUAACUA	3.19	3.19	1	18S
AACGCGCCCGAUCUCGUCUGAUCUCGGA	2.44	2.45	0.995918	5S_rRNA
AACUUCGGGAUAAGGAUUGGC	2.44	2.45	0.995918	28S
CUUAAAGGAAUUGACGGAAGGGCA	2.44	2.45	0.995918	18S
GCAGAACUGGCGCUGCGGGAUGA	2.44	2.45	0.995918	28S
GGGACAUGUGGCGUACGGAAGACCCG	11.46	11.52	0.994792	28S
GAGGAAACUCUGGUGGAGGUCCGUA	8.46	8.58	0.986014	28S
AGAAGGGUCGGGGCGGCAGG	3.38	3.43	0.985423	28S
AAAGUCGGAGGUUCGAAGA	6.01	6.13	0.980424	18S
GCCGACUUAGAACUGGUGCGGA	4.32	4.41	0.979592	28S
CGUGGACGGUGUGAGGCCGG	5.26	5.39	0.975881	28S
CGAAGCGGGGCUGGGCGC	2.63	2.7	0.974074	28S
GAUAUAGACAGCAGGACGGUGGCCA	2.63	2.7	0.974074	28S
UACCUGGUUGAUCCUGCCAGUAG	2.63	2.7	0.974074	18S
GGCGCAAGACGGACCAGAGCG	10.71	11.03	0.970988	18S
AAGAAAUUCAAUGAAGCGCGGGUA	5.45	5.64	0.966312	28S
AUCUCGGAAGCUAAGCAGGGUCGGGCCUGG	3.76	3.92	0.959184	5S_rRNA
GGGAGGGCGCGCGGGUCGGGG	3.76	3.92	0.959184	28S
CCACUAAUAGGGAACGUGAGCUGG	2.82	2.94	0.959184	28S
CCGGCGCAAGACGGACCAGAGCGAAAG	2.82	2.94	0.959184	18S
GGAAUACCGGGUGCUGUAGGCUUU	2.82	2.94	0.959184	5S_rRNA
UAAUGGAAUAGGACCGCGGU	2.82	2.94	0.959184	18S
ACAGCAGUUGAACAUGGGUCAGUCG	1.88	1.96	0.959184	28S
CCGGCGCAAGACGGACCAGAGCGAAAGC	1.88	1.96	0.959184	18S
CGGACAGGAUUGACAGA	1.88	1.96	0.959184	18S
CGGGCUGGGGCGCGAAGC	1.88	1.96	0.959184	28S
CUAGAGGUGAAAUUCUUGGACCGGCG	1.88	1.96	0.959184	18S
GCUAGGAAUAAUGGAAUAGGACCGC	1.88	1.96	0.959184	18S
UCUGGACGCGAGCCGGG	10.33	10.79	0.957368	28S
AGCCGACUUAGAACUGGUGCGG	3.95	4.17	0.947242	28S
GCUAAGCAGGGUCGGGCCUGG	3.95	4.17	0.947242	5S_rRNA
GGCGACUCUGGACGCGAGCCGGGCCCU	3.01	3.19	0.943574	28S
AAAAGAACUUUGAAGAGAGAG	22.17	23.53	0.942201	28S
CUAAUAGGGAACGUGAGCUG	8.08	8.58	0.941725	28S
CGUAGCGGUCCUGACGUGCA	45.28	48.29	0.937668	28S
ACGGUGAAGAGACAUGAGAGGUG	2.07	2.21	0.936652	28S
AGGACAGAAACCUCCCGUGGAGCAGA	2.07	2.21	0.936652	28S
CAGUGCGCCCCGGGCGGGUCGCGCCGUCGG	2.07	2.21	0.936652	28S
CUAAGGCGAGCUCAGGG	2.07	2.21	0.936652	28S
CUGGACGCGAGCCGGGCCCUUCCCGU	2.07	2.21	0.936652	28S
GUGACGCGCAUGAAUGGAUG	2.07	2.21	0.936652	28S
UAAUCAAGAACGAAAGUCGGAGG	2.07	2.21	0.936652	18S
UCCUCCCCGGAGGGGGCGGGCUCCGGCGGG	2.07	2.21	0.936652	28S
GAGAGGUGUAGAAUAAGUGGGAGGCCCCCG	7.33	7.84	0.934949	28S
UAGAUGUCCGGGGCUGCACGCGCGCUA	5.26	5.64	0.932624	18S
CGGCGGCGGCGGCGACUCUGGACGCGAG	3.19	3.43	0.930029	28S
GGUUUCGUACGUAGCAGAG	3.19	3.43	0.930029	28S
GUCUACGGCCAUACCACCCU	3.19	3.43	0.930029	5S_rRNA
GGGACAUGUGGCGUACGGAAGA	51.67	55.64	0.928648	28S
GGGCGGGUCGCGCCGUCGGG	4.32	4.66	0.927039	28S
CGUAGCGGUCCUGACGUGC	11.09	12.01	0.923397	28S
AAGGGUCGGGGCGGCAGG	2.25	2.45	0.918367	28S
AGAGGAAACUCUGGUGGAGGUC	2.25	2.45	0.918367	28S
GGCGGGUCGCGCCGUCGGGCCCGGGG	2.25	2.45	0.918367	28S
AGAGGUGUAGAAUAAGUGGGAGGCCCC	7.14	7.84	0.910714	28S
AACGAGAACUUUGAAGGCCGAAGUGG	3.57	3.92	0.910714	28S
AUUGCAGGACACAUUGAUCAUCGAC	3.57	3.92	0.910714	5.8S
GAAGCGGGGCUGGGCGCGCG	3.57	3.92	0.910714	28S
AAGCAGAAUUCACCAAGCGUUGGA	8.46	9.31	0.9087	28S
AAUAAUGGAAUAGGACCGCGGU	4.89	5.39	0.907236	18S
CGUAGCGGUCCUGACGUGCAA	11.09	12.26	0.904568	28S
CAUUGGAGGGCAAGUCUGGUG	2.44	2.7	0.903704	18S
AACGAGAACUUUGAAGGCCGAAGUGGA	3.76	4.17	0.901679	28S
CCAUUGGAGGGCAAGUCUGGUG	3.76	4.17	0.901679	18S
CAAGAACGAAAGUCGGAG	2.63	2.94	0.894558	18S
CUUAAAGGAAUUGACGG	2.63	2.94	0.894558	18S
GAAGACGGUCGAACUUGA	2.63	2.94	0.894558	18S
GGCGCAAGACGGACCAGAGCGAAA	2.63	2.94	0.894558	18S
GUGCGCCCCGGGCGGGUCGCGCCGUCGGG	2.63	2.94	0.894558	28S
CGAACGAGACUCUGGCAUGCUAAC	4.13	4.66	0.886266	18S
ACCCCACGUCUCGUCGCGCGCGCGUCC	2.82	3.19	0.884013	28S
GCUCUAAGGGCUGGGUCGG	2.82	3.19	0.884013	28S
AACGAGAACUUUGAAGGCCGAAGUG	4.32	4.9	0.881633	28S
AACGAAAGUCGGAGGUU	3.01	3.43	0.877551	18S
CCGGACACGGACAGGAUUGACAGA	3.01	3.43	0.877551	18S
GAACGAAAGUCGGAGGUUCGAAGA	3.01	3.43	0.877551	18S
GAGGUGUAGAAUAAGUGGGAGGCCCC	3.01	3.43	0.877551	28S
GAUUAGAGGUCUUGGGGC	3.01	3.43	0.877551	28S
GACUCUUAGCGGUGGAUCACUCG	12.03	13.73	0.876184	5.8S
CGCGAAGCGGGGCUGGGCGCGC	4.51	5.15	0.875728	28S
CGGGAUGAACCGAACGCCGGGU	4.51	5.15	0.875728	28S
AGCGGUGGAUCACUCGGCUCGUGCGUC	3.19	3.68	0.866848	5.8S
CGCUGAGAAGACGGUCGAACUUGAC	3.19	3.68	0.866848	18S
CGAUCGAAAGGGAGUCGGG	5.07	5.88	0.862245	28S
GCAGUUAAAAAGCUCGUAGUUGGA	3.38	3.92	0.862245	18S
CAGGAGUGGAGCCUGCGGCUUA	5.26	6.13	0.858075	18S
AAAGCAUCGCGAAGGCCC	16.54	19.36	0.854339	28S
CCGGCGGCGUCCGGUGAGCUCUCGCUGGC	12.97	15.2	0.853289	28S
CUCGGGGCCACGCGCGCGUCCCCCGA	7.52	8.82	0.852608	28S
UUGCAGGACACAUUGAUCAUCG	3.76	4.41	0.852608	5.8S
GCCCGUGGACGGUGUGAGG	5.64	6.62	0.851964	28S
AAAAUGGAUGGCGCUGGA	1.88	2.21	0.850679	28S
AAGGCGAGCUCAGGGAGGACAGAA	1.88	2.21	0.850679	28S
AGGAGUCUAACACGUGCGCGAGUCGGG	1.88	2.21	0.850679	28S
AUGAAUGGAUGAACGAGAU	1.88	2.21	0.850679	28S
AUUAAUCAAGAACGAAAGUCGGA	1.88	2.21	0.850679	18S
AUUGCAGGACACAUUGAUCAUCGACAC	1.88	2.21	0.850679	5.8S
GACCGGCGCAAGACGGACCAGAGCGAA	1.88	2.21	0.850679	18S
GUGGAUCACUCGGCUCGUGCGU	1.88	2.21	0.850679	5.8S
CCAGGAGUGGAGCCUGCGGC	7.7	9.07	0.848953	18S
AUGGGUCAGUCGGUCCUGAGAGAUGGG	2.07	2.45	0.844898	28S
CGGUCGGGCUGGGGCGCGAAGC	2.07	2.45	0.844898	28S
GACUCUGGACGCGAGCCGGG	2.07	2.45	0.844898	28S
GCCGACUUAGAACUGGUGCGGAC	2.07	2.45	0.844898	28S
GGUUUCGUACGUAGCAGAGCAGCU	2.07	2.45	0.844898	28S
AACGAAAGUCGGAGGUUCGAAGACG	25.74	30.64	0.840078	18S
AAACCAUUCGUAGACGACCUGCUUC	8.64	10.3	0.838835	28S
GCGCCCCGGGCGGGUCGCGCCGUCGG	4.32	5.15	0.838835	28S
ACUGGGGCGGUACACCUGUCAAACGG	2.25	2.7	0.833333	28S
AUUAGUGACGCGCAUGAAUGGA	2.25	2.7	0.833333	28S
CAGCCGACUUAGAACUGGUGCGGACCA	2.25	2.7	0.833333	28S
UCCGGCGGCGUCCGGUGAGCUCUCGCUGG	4.89	5.88	0.831633	28S
UGGACGCGAGCCGGGC	4.89	5.88	0.831633	28S
AGGGAAGUCGGCAAGCCGGAUCCGU	2.44	2.94	0.829932	28S
CAAGAACGAAAGUCGGAGGUU	2.44	2.94	0.829932	18S
CAGGUGCAGAUCUUGGUGGUAGUAGCA	2.44	2.94	0.829932	28S
CCCGGGUCUUCCCGGAGUCGGGUU	2.44	2.94	0.829932	28S
CGACUUAGAACUGGUGCGGACCAGGGGA	2.44	2.94	0.829932	28S
CGCGACCUCAGAUCAGACGUGGCGACCCG	80.24	96.82	0.828754	28S
GGCGGGUGUUGACGCGAU	22.74	27.45	0.828415	28S
GGCGGCGGCGACUCUGGACGCGAGCCGGG	18.41	22.31	0.82519	28S
AACCAUUCGUAGACGACCUGCUU	2.63	3.19	0.824451	28S
GGGACAUGUGGCGUACGGAAGAC	24.62	29.91	0.823136	28S
GAGAGGUGUAGAAUAAGUGGGAGG	2.82	3.43	0.822157	28S
CUCGUCUGAUCUCGGAAGCUAAGCAGGG	11.65	14.22	0.819269	5S_rRNA
GGAAUACCGGGUGCUGUAG	8.83	10.79	0.81835	5S_rRNA
CACGUCUCGUCGCGCGCGCGUCCGC	3.01	3.68	0.817935	28S
GAACGAAAGUCGGAGGUUCGAAG	3.01	3.68	0.817935	18S
GGAAUACCGGGUGCUGUAGG	3.01	3.68	0.817935	5S_rRNA
AACGAGACUCUGGCAUGCUAACUAG	6.01	7.35	0.817687	18S
CCAAGGGAACGGGCUUGGCGGA	9.21	11.28	0.816489	28S
GGCGGGUGUUGACGCGA	3.19	3.92	0.813776	28S
AACGAAAGUCGGAGGUUCGAAG	3.57	4.41	0.809524	18S
GUCUCGUCGCGCGCGCGUCC	3.57	4.41	0.809524	28S
GAAUAAUGGAAUAGGACCGCGGUU	3.76	4.66	0.806867	18S
GCAGGACACAUUGAUCAUCGAC	3.76	4.66	0.806867	5.8S
AGCUAAGCAGGGUCGGGCCUGG	3.95	4.9	0.806122	5S_rRNA
AUCGGUCGUCCGACCUGGGUAUAGGGGCG	3.95	4.9	0.806122	28S
AACAGCAGUUGAACAUGGG	11.65	14.46	0.805671	28S
GAACGAAAGUCGGAGGUUCGAAGACGA	8.27	10.3	0.802913	18S
CCUUGGAAAGCGUCGCGGU	4.32	5.39	0.801484	28S
AAAGCAUCGCGAAGGCC	4.51	5.64	0.799645	28S
AAGGAGUCUAACACGUGCGCGAGUCGGG	9.58	12.01	0.797669	28S
ACGAGAACUUUGAAGGCCGAAG	48.48	60.79	0.7975	28S
CCAAGCGUUGGAUUGUUCA	5.07	6.37	0.795918	28S
GGAAUACCGGGUGCUGUA	5.07	6.37	0.795918	5S_rRNA
CGGUCGGGCUGGGGCGCGAAG	5.45	6.86	0.794461	28S
CCACUAAUAGGGAACGUGAGC	11.09	13.97	0.793844	28S
GACUCUUAGCGGUGGAUCACUCGG	78.92	99.52	0.793006	5.8S
AAACGAGAACUUUGAAGGCCGAAGUGG	6.01	7.6	0.790789	28S
CCUAAGGCGAGCUCAGGGAG	7.33	9.31	0.787325	28S
GACUCUUAGCGGUGGAU	7.14	9.07	0.787211	5.8S
CCAGGAGUGGAGCCUGCGGCUU	7.89	10.05	0.785075	18S
AAGGAAUUGACGGAAGGG	8.27	10.54	0.78463	18S
AGCAGCCGACUUAGAACUGGUGCGGA	8.64	11.03	0.783318	28S
GCGGGUGUUGACGCGAUGU	33.82	43.39	0.779442	28S
AAGGAAUUGACGGAAGGGCACCA	20.11	25.98	0.774057	18S
CGAGAACUUUGAAGGCCGAAGU	3.01	3.92	0.767857	28S
GGUGAACCUGCGGAAGGAUCAUUA	4.89	6.37	0.767661	18S
AAGGAUUGGCUCUAAGGGCUGGGUCGG	1.88	2.45	0.767347	28S
AGAUCAGACGUGGCGACCCG	1.88	2.45	0.767347	28S
CCAAGGGAACGGGCUUGGCGGAAU	1.88	2.45	0.767347	28S
GAAAGGGAGUCGGGUUCAG	1.88	2.45	0.767347	28S
GGACGGCUGGGAAGGCCCGGCGGGGA	1.88	2.45	0.767347	28S
AGAGGAAACUCUGGUGGAGGU	3.95	5.15	0.76699	28S
CCGGGUCUUCCCGGAGUCGGGUUG	3.95	5.15	0.76699	28S
UGCGGUAACGCGACCGAUCCCGGAG	3.95	5.15	0.76699	28S
ACCUCAGAUCAGACGUGGCG	2.63	3.43	0.766764	28S
ACUUAAAGGAAUUGACGGAAGGGCA	2.63	3.43	0.766764	18S
AGAAGGGUCGGGGCGGCAG	2.63	3.43	0.766764	28S
CCCACGUCUCGUCGCGCGCGCGUCC	2.63	3.43	0.766764	28S
CGGGAUGAACCGAACGCCGG	2.63	3.43	0.766764	28S
CAAACGAGAACUUUGAAGGCCGAAGU	2.07	2.7	0.766667	28S
GCCGAUCGAAAGGGAGUCGGGU	2.07	2.7	0.766667	28S
UGCGCCCCGGGCGGGUCGCGCCGUCGGG	14.28	18.63	0.766506	28S
CGUGGACGGUGUGAGGCCG	3.38	4.41	0.76644	28S
GGGACAUGUGGCGUACGGAAGACCC	3.38	4.41	0.76644	28S
AAAAGAACUUUGAAGAGAGAGU	6.2	8.09	0.766378	28S
CUCCCCCGCGGGGGCGCGCCGGCGU	2.82	3.68	0.766304	28S
GAACGAAAGUCGGAGGUUC	2.82	3.68	0.766304	18S
GAACGAAAGUCGGAGGUU	4.13	5.39	0.766234	18S
CGGGCUCCGGCGGGUG	3.57	4.66	0.766094	28S
AAAUUCUUGGACCGGCGCAA	2.25	2.94	0.765306	18S
AAGGGUCGGGGCGGCAG	2.25	2.94	0.765306	28S
ACCUCAGAUCAGACGUGGCGA	2.25	2.94	0.765306	28S
AGAAGGGCAAAAGCUCGCUUGAUCUUG	2.25	2.94	0.765306	28S
AGGGCUGGGUCGGUCG	2.25	2.94	0.765306	28S
GAAGUCGGCAAGCCGGAUCCGUA	2.25	2.94	0.765306	28S
GCGGGUCGCGCCGUCGGGCCCGGG	2.25	2.94	0.765306	28S
GCGGAAUCAGCGGGGA	3.19	4.17	0.764988	28S
AGGGACAAGUGGCGUUCAG	2.44	3.19	0.76489	18S
GUCGAGAGUGGACGGGAG	2.44	3.19	0.76489	28S
UAAAGGAAUUGACGGAAGGGCACC	2.44	3.19	0.76489	18S
UGUGAACAGCAGUUGAACAUG	2.44	3.19	0.76489	28S
UAAUGGAAUAGGACCGCGGUU	8.08	10.79	0.748842	18S
ACGGACAGGAUUGACAGAUUGA	6.95	9.31	0.746509	18S
UCAUUGUGAAGCAGAAUUCA	6.01	8.09	0.742892	28S
CGUAGCGGUCCUGACGUGCAAAUCG	5.45	7.35	0.741497	28S
CAGAUCAGACGUGGCGACCCG	4.89	6.62	0.738671	28S
GGCGCAAGACGGACCAGAGCGAA	4.89	6.62	0.738671	18S
GGCGGCGACUCUGGACGCGAGCCGGGCCCU	4.7	6.37	0.737834	28S
ACGAAAGUCGGAGGUUCGAAGA	4.51	6.13	0.735726	18S
GCGCAAGACGGACCAGA	4.51	6.13	0.735726	18S
CGGUGGAUCACUCGGCUCG	8.46	11.52	0.734375	5.8S
AAUUAGUGACGCGCAUGAAUGGAUG	8.27	11.28	0.733156	28S
CUAAUAGGGAACGUGAGC	3.95	5.39	0.732839	28S
AACAAAGCAUCGCGAAGGCCCG	3.76	5.15	0.730097	28S
GGCGGGUGUUGACGCGAUGUG	17.66	24.27	0.727647	28S
GGCGCAAGACGGACCAGAGCGA	10.33	14.22	0.726442	18S
AAAAAGCUCGUAGUUGGA	9.4	12.99	0.723634	18S
UGAGAAGACGGUCGAACUUGACU	6.2	8.58	0.722611	18S
UCUGGACGCGAGCCGG	3.01	4.17	0.721823	28S
UGGUGCGGACCAGGGGAAUCCGACUG	3.01	4.17	0.721823	28S
AACGAGACUCUGGCAUGCUAAC	5.64	7.84	0.719388	18S
CAAGGAGUCUAACACGUG	2.82	3.92	0.719388	28S
CGGGCGGCGGAGGGGCCGCGG	2.82	3.92	0.719388	28S
GCCCCGGCCGGGGGGCGGGCGCCGGCG	8.27	11.52	0.717882	18S
CCGACUUAGAACUGGUGCGGACC	2.63	3.68	0.714674	28S
CUGCGGGAUGAACCGAACGCCGG	2.63	3.68	0.714674	28S
ACCCCACGUCUCGUCGCGCGCGC	2.44	3.43	0.71137	28S
ACUUCUUAGAGGGACAAGUGGCGUU	2.44	3.43	0.71137	18S
AGAACUUUGAAGGCCGAAGUGGAG	2.44	3.43	0.71137	28S
CCGUGGACGGUGUGAG	2.44	3.43	0.71137	28S
AAACGAGAACUUUGAAGGCCGAAGUG	4.51	6.37	0.708006	28S
CCGGACACGGACAGGAUUGAC	2.25	3.19	0.705329	18S
CGGGCUUGGCGGAAUCAGCGGGGA	2.25	3.19	0.705329	28S
GAGAGGUGUAGAAUAAGUGGGAGGC	2.25	3.19	0.705329	28S
UCGGUCGGGCUGGGGCGCGAAG	2.25	3.19	0.705329	28S
CCGGCAGUCGAGAGUGGACGGGA	4.32	6.13	0.704731	28S
AGGACCGCGGUUCUAUUUUGUUGGUU	2.07	2.94	0.704082	18S
AUAGCUGGCGCUCUCGCAGA	2.07	2.94	0.704082	28S
GCCGACUUAGAACUGGUGCGGACC	2.07	2.94	0.704082	28S
GUGCGCCCCGGGCGGGUCGCGCCGUCGGGC	2.07	2.94	0.704082	28S
CCGGGGCUACGCCUGUCUGAGCGUCGCU	10.52	14.95	0.703679	5.8S
AAGGAAUUGACGGAAGGGCACCAC	3.95	5.64	0.700355	18S
CGAGAACUUUGAAGGCCGAA	5.83	8.33	0.69988	28S
AAGCCGGCGGGAGCCCCGGGG	3.76	5.39	0.697588	28S
AGAGGUCUUGGGGCCGAAACGAUCUCA	1.88	2.7	0.696296	28S
AGCCGACUUAGAACUGGUGCGGACCA	1.88	2.7	0.696296	28S
CUGGACGCGAGCCGGGCCC	1.88	2.7	0.696296	28S
GGUGAAAUUCUUGGACCGGCG	1.88	2.7	0.696296	18S
UUCGUACGUAGCAGAGCAGCUC	1.88	2.7	0.696296	28S
CUCGUCUGAUCUCGGAAGCUAAGCAG	8.64	12.5	0.6912	5S_rRNA
CACUAAUAGGGAACGUGAGCUG	5.07	7.35	0.689796	28S
AUAACCUCGGGCCGAUCGCA	3.38	4.9	0.689796	18S
CCGGACACGGACAGGAUUGACAGAUUG	3.38	4.9	0.689796	18S
AGCCGACUUAGAACUGGUGCGGACCAG	1.69	2.45	0.689796	28S
GCAGAUCUUGGUGGUAGUAGC	1.69	2.45	0.689796	28S
GGGUUUCGUACGUAGCAGAGCAGCU	1.69	2.45	0.689796	28S
CGAGAACUUUGAAGGCCGAAG	26.87	38.97	0.689505	28S
AACGAACGAGACUCUGGCAUGCUAACUA	4.89	7.11	0.687764	18S
AUUGCAGGACACAUUGAUCAUCG	3.19	4.66	0.684549	5.8S
GACCCGGGGAGGUAGUGACGAA	3.19	4.66	0.684549	18S
AACGAAAGUCGGAGGUUCGAA	3.01	4.41	0.68254	18S
GAGAGGUGUAGAAUAAGUGGGAGGCC	3.01	4.41	0.68254	28S
ACGAGAACUUUGAAGGCCGAAGU	6.01	8.82	0.681406	28S
GAGGUGUAGAAUAAGUGGGAGGCCCCC	5.83	8.58	0.679487	28S
GCUGAGAAGACGGUCGAACUUG	5.83	8.58	0.679487	18S
UAGAUGUCCGGGGCUGCACGCGCG	2.82	4.17	0.676259	18S
UGCAGAUCUUGGUGGUAGUAGCAA	2.82	4.17	0.676259	28S
AUCGAAAGGGAGUCGGGUU	6.95	10.3	0.674757	28S
ACCCGGGGAGGUAGUGACGAA	4.13	6.13	0.673736	18S
CGGACAGGAUUGACAGAUUGAU	4.13	6.13	0.673736	18S
AGCCCGUGGACGGUGUGAG	2.63	3.92	0.670918	28S
UGCGCCCCGGGCGGGUCGCGCCGUCG	2.63	3.92	0.670918	28S
AAGAACGAAAGUCGGAGGUUCGAAGACG	12.78	19.12	0.66841	18S
AGCAGAAUUCACCAAGCGUUGGA	3.76	5.64	0.666667	28S
GGCCGCCGGUGAAAUACCACUACU	2.44	3.68	0.663043	28S
GGUGCAGAUCUUGGUGGUAGUAGCA	2.44	3.68	0.663043	28S
AACGAGACUCUGGCAUGCUAACUAGUU	4.7	7.11	0.661041	18S
UGAACAGCAGUUGAACAUG	4.7	7.11	0.661041	28S
CGCGACCUCAGAUCAGACGUGGCGACCC	8.08	12.26	0.659054	28S
ACGAGAACUUUGAAGGCCGAA	9.02	13.73	0.656956	28S
AACUGGCGCUGCGGGA	3.38	5.15	0.656311	28S
AAUUCUUGGACCGGCGCAAGACG	2.25	3.43	0.655977	18S
CAGGACGGUGGCCAUGGAAGUCGGA	2.25	3.43	0.655977	28S
GGACAUGUGGCGUACGGAAGA	2.25	3.43	0.655977	28S
GGGUCGCGCCGUCGGGCCCGGGGGAG	2.25	3.43	0.655977	28S
CGGCGGAGGGGCCGCGGGCCG	5.45	8.33	0.654262	28S
CCACGGGUGACGGGGAAUCAGG	4.32	6.62	0.652568	18S
AAGAACGAAAGUCGGAG	3.19	4.9	0.65102	18S
AAGGAUUGGCUCUAAGGGCUGGG	2.07	3.19	0.648903	28S
AGAGGAAACUCUGGUGGAGG	2.07	3.19	0.648903	28S
CCUAAGGCGAGCUCAGGGAGG	2.07	3.19	0.648903	28S
GCUGGCGUGGAGCCGGGCGU	2.07	3.19	0.648903	28S
GGGACAUGUGGCGUACGGAA	6.2	9.56	0.648536	28S
CUGGUGCGGACCAGGGGAAUCCGACUG	4.13	6.37	0.648352	28S
AGAGGUGUAGAAUAAGUGGGAGGCCCCCG	25.74	39.71	0.648199	28S
GCCGACUUAGAACUGGUGCGGACCAGGGG	6.01	9.31	0.645542	28S
ACGAAAGUCGGAGGUUCGAAGACG	16.72	25.98	0.643572	18S
AGAACGAAAGUCGGAGGUUCGAAGACG	9.58	14.95	0.640803	18S
AAGGAAUUGACGGAAGGGC	4.7	7.35	0.639456	18S
AACUUCGGGAUAAGGAUUG	2.82	4.41	0.639456	28S
CAGUUGAACAUGGGUCAGUCGGU	2.82	4.41	0.639456	28S
ACGAGACUCUGGCAUGCUAAC	1.88	2.94	0.639456	18S
AUGGGCGAGCGCCGUUCCGAAGGGACGGG	1.88	2.94	0.639456	28S
CGGACGCUACGCCGCGACGAGUAGGAG	1.88	2.94	0.639456	28S
GGGUUUCGUACGUAGCAGAGCA	1.88	2.94	0.639456	28S
UCCUUCGAUGUCGGCUCUU	1.88	2.94	0.639456	28S
CCAAGCGUUGGAUUGUUCAC	10.33	16.18	0.638443	28S
GCGGGUGUUGACGCGAUGUG	24.62	38.73	0.635683	28S
AAUAAUGGAAUAGGACCGCGGUU	13.34	21.08	0.632827	18S
UACCUGGUUGAUCCUGCCAGU	5.26	8.33	0.631453	18S
AUCAAGAACGAAAGUCGGAG	2.63	4.17	0.630695	18S
ACGGACAGGAUUGACAGAUUG	4.32	6.86	0.629738	18S
AACUUAAAGGAAUUGACGGAAGGG	1.69	2.7	0.625926	18S
ACGAGAACUUUGAAGGCCG	1.69	2.7	0.625926	28S
CGCGCCGCGGCUGGACGA	1.69	2.7	0.625926	28S
CGGCGGCGGCGGCGACUCUG	1.69	2.7	0.625926	28S
GAGAGGGAGCCUGAGAAACGG	1.69	2.7	0.625926	18S
GGGGGCGGGCUCCGGCG	1.69	2.7	0.625926	28S
CCGGCGCAAGACGGACCAGAGCG	11.46	18.38	0.623504	18S
CGGACAGGAUUGACAGAUU	2.44	3.92	0.622449	18S
AAGGAGUCUAACACGUGCGCGAGUCG	3.19	5.15	0.619417	28S
AGCAGAAUUCACCAAGCG	3.19	5.15	0.619417	28S
UGGGCGCGCGCCGCGGCUGG	7.7	12.5	0.616	28S
AACAUGGGUCAGUCGGU	1.5	2.45	0.612245	28S
AAGGGCAAAAGCUCGCUUGAUCUUGA	1.5	2.45	0.612245	28S
AGGGCUGGGUCGGUCGG	1.5	2.45	0.612245	28S
CCAAGCGUUGGAUUGUUCACCCAC	1.5	2.45	0.612245	28S
CGAAGGGACGGGCGAU	1.5	2.45	0.612245	28S
GCCCCGGCCGGGGGGCGGGCGC	1.5	2.45	0.612245	18S
GCCGGCGGCGGCGGCGACUCUGGACGCGA	1.5	2.45	0.612245	28S
GGAAUAAUGGAAUAGGACCGC	1.5	2.45	0.612245	18S
GGAAUAAUGGAAUAGGACCGCGGUUC	1.5	2.45	0.612245	18S
GGGAUAAGGAUUGGCUC	1.5	2.45	0.612245	28S
AGGGGCGAAAGACUAAUCGA	2.25	3.68	0.611413	28S
CGGGAUGAACCGAACGCCGGGUU	2.25	3.68	0.611413	28S
UCUAAUUAGUGACGCGCAUGAAUGG	2.25	3.68	0.611413	28S
UCGUACGUAGCAGAGCAG	21.42	35.05	0.611127	28S
CGGGGCUACGCCUGUCUGAGCGUCGCU	32.32	52.95	0.610387	5.8S
UAAAAAGCUCGUAGUUGGA	8.64	14.22	0.607595	18S
AACGAGACUCUGGCAUGCUAACU	5.64	9.31	0.6058	18S
AAGGAAUUGACGGAAGGGCAC	9.77	16.18	0.603832	18S
CCGGGGCUACGCCUGUCUGAGCGUCGCUU	2.07	3.43	0.603499	5.8S
CCUCCCCGGAGGGGGCGGGCUCCGGCGGGU	2.07	3.43	0.603499	28S
GCCCCGGCCGGGGGGCGGGCGCCGGC	2.07	3.43	0.603499	18S
GCGCUGAGAAGACGGUCGAACUUGACU	2.07	3.43	0.603499	18S
AAAGUCGGAGGUUCGAAGACG	41.53	69.13	0.600752	18S
GGCGGGUGUUGACGCGAUGUGA	18.04	30.15	0.598342	28S
AACUUCGGGAUAAGGAUUGGCU	6.01	10.05	0.59801	28S
CGAAGGGACGGGCGAUGGCC	12.59	21.08	0.597249	28S
UGGACGCGAGCCGGGCC	5.83	9.81	0.594292	28S
CUAAGGCGAGCUCAGGGA	3.76	6.37	0.590267	28S
CCGGACACGGACAGGAUUGACAG	1.88	3.19	0.589342	18S
GCCGCGACGAGUAGGAGGGCCGCUG	1.88	3.19	0.589342	28S
GGGAUGAACCGAACGCCGGG	1.88	3.19	0.589342	28S
CUCGUCUGAUCUCGGA	13.72	23.29	0.589094	5S_rRNA
CUAAGGCGAGCUCAGGGAGGA	4.32	7.35	0.587755	28S
AAUCGGUCGUCCGACCUGGGUAUAGGGG	9.77	16.67	0.586083	28S
UCGUACGUAGCAGAGCAGC	5.45	9.31	0.585392	28S
AUUCUUGGACCGGCGCAAGACG	2.44	4.17	0.585132	18S
GCCGCGGCUGGACGAGGCGCCG	2.44	4.17	0.585132	28S
GGGUUUCGUACGUAGCAGAGCAG	2.44	4.17	0.585132	28S
UUCAAACGAGAACUUUGAAGGCCGAAG	6.01	10.3	0.583495	28S
GGGGCUACGCCUGUCUGAGCGUCGCU	150.7	258.36	0.583295	5.8S
AAUAAUGGAAUAGGACCGCGGUUC	4.7	8.09	0.580964	18S
CUAAACCAUUCGUAGACGACCUG	4.13	7.11	0.580872	28S
AAAGUCGGAGGUUCGAAGACGAUCAGA	4.51	7.84	0.575255	18S
AGCAGCCGACUUAGAACUGGUGCGG	4.51	7.84	0.575255	28S
CGGCGGCGUCCGGUGAGCUCUCGCUGGC	5.07	8.82	0.57483	28S
GGGACAUGUGGCGUACGGAAGACCCGC	5.07	8.82	0.57483	28S
GUGAACAGCAGUUGAACAUG	3.38	5.88	0.57483	28S
ACGUAGCAGAGCAGCUCCCUCG	1.69	2.94	0.57483	28S
ACUCUAGUCUGGCACGGUGA	1.69	2.94	0.57483	28S
CCCCACGUCUCGUCGCGCGCGC	1.69	2.94	0.57483	28S
GAACGAAAGUCGGAGGUUCGA	1.69	2.94	0.57483	18S
UACGUAGCAGAGCAGCUCCCUCG	1.69	2.94	0.57483	28S
UCGGGCUGGGGCGCGAAGCG	1.69	2.94	0.57483	28S
AAACGAGAACUUUGAAGGCCG	2.25	3.92	0.57398	28S
AGGGAUAACUGGCUUGUGGCG	2.25	3.92	0.57398	28S
CAGGAGUGGAGCCUGCGGC	2.25	3.92	0.57398	18S
GGUUUCGUACGUAGCAGAGCAG	2.25	3.92	0.57398	28S
UAAGGGAAGUCGGCAAGCCGG	2.25	3.92	0.57398	28S
UCGGGAUAAGGAUUGGCUC	2.25	3.92	0.57398	28S
AGAACGAAAGUCGGAGGU	4.89	8.58	0.56993	18S
ACCACGGGUGACGGGGAAUCAGG	3.19	5.64	0.565603	18S
AACUGCGAAUGGCUCAUUA	2.63	4.66	0.564378	18S
ACUGGCGCUGCGGGAUG	2.63	4.66	0.564378	28S
GCCCCGGCCGGGGGGCGGGCGCCGGCGGCU	2.63	4.66	0.564378	18S
GGGCGCGCGCCGCGGCUGG	4.7	8.33	0.564226	28S
AGGAAACUCUGGUGGAGGUCCGUA	14.09	25	0.5636	28S
CUCAGAUCAGACGUGGCG	2.07	3.68	0.5625	28S
CUCAGAUCAGACGUGGCGA	2.07	3.68	0.5625	28S
UCAAACGAGAACUUUGAAGGCCGAAGU	2.07	3.68	0.5625	28S
AGGAAACUCUGGUGGAGGUCCGU	74.22	132.37	0.560701	28S
AAGCAGAAUUCACCAAGCG	3.57	6.37	0.56044	28S
AUCGGUCGUCCGACCUGGGUAUAGGG	3.95	7.11	0.555556	28S
AAGUCGGCAAGCCGGAUCCGUA	1.5	2.7	0.555556	28S
AGCAGUUGAACAUGGGUCAGUCG	1.5	2.7	0.555556	28S
AGGACGGUGGCCAUGGAAGUCG	1.5	2.7	0.555556	28S
AUAAUGGAAUAGGACCGCGGUUC	1.5	2.7	0.555556	18S
GAUCUCGUCUGAUCUCGGA	1.5	2.7	0.555556	5S_rRNA
GCAAGACGGACCAGAGCGAA	1.5	2.7	0.555556	18S
GCUAAGCAGGGUCGGGCCU	1.5	2.7	0.555556	5S_rRNA
GGCCGCCGGUGAAAUACCACUACUC	1.5	2.7	0.555556	28S
GGCGGGUCGCGCCGUCGGGCCCGGG	1.5	2.7	0.555556	28S
GGUCGCGCCGUCGGGCCCGGG	1.5	2.7	0.555556	28S
UCGUCUGAUCUCGGAAGCUAAGCAGGGU	1.5	2.7	0.555556	5S_rRNA
UUCGUACGUAGCAGAGCAG	1.5	2.7	0.555556	28S
UCCGGUGAGCUCUCGCUGG	2.44	4.41	0.553288	28S
UGGGAAUACCGGGUGCUGUAGGCUU	2.44	4.41	0.553288	5S_rRNA
UGAGAAGACGGUCGAACUUG	4.32	7.84	0.55102	18S
CGGGUGUUGACGCGAUGUG	7.14	12.99	0.549654	28S
ACCUCAGAUCAGACGUGGCGAC	1.88	3.43	0.548105	28S
AGGAUAGCUGGCGCUCUCGCAGA	1.88	3.43	0.548105	28S
GAGGGACAAGUGGCGUUCAG	1.88	3.43	0.548105	18S
ACAAAGCAUCGCGAAGGCCCG	2.82	5.15	0.547573	28S
CGCGACCUCAGAUCAGACGUGGCGACC	14.84	27.21	0.545388	28S
UCGGGCUGGGGCGCGAAGCGG	16.54	30.4	0.544079	28S
GCAGAUCUUGGUGGUAGUAGCAA	4.13	7.6	0.543421	28S
GAUCGAAAGGGAGUCGGG	4.51	8.33	0.541417	28S
UUGAUCCUUCGAUGUCGGCU	2.25	4.17	0.539568	28S
UUUUGAUCCUUCGAUGUCGGCU	2.25	4.17	0.539568	28S
CGGCGGCGUCCGGUGAGCUCUCGCUGGCC	4.89	9.07	0.53914	28S
AACAAUGUAGGUAAGGGAA	1.32	2.45	0.538776	28S
ACGCCUGUCUGAGCGUCG	1.32	2.45	0.538776	5.8S
ACGGCGAGUGAACAGGGAAGAGCCCAG	1.32	2.45	0.538776	28S
CCCCCGCGGGGGCGCGCCGG	1.32	2.45	0.538776	28S
CGGGGUUUCGUACGUAGCAGAGCAG	1.32	2.45	0.538776	28S
GAAUAAUGGAAUAGGACCGCG	1.32	2.45	0.538776	18S
GAUUCCGGAGAGGGAGCCUGAGAAACGGCU	1.32	2.45	0.538776	18S
GGGUUCCAUGUGAACAGCAGUUGAACAU	1.32	2.45	0.538776	28S
GUCUACGGCCAUACCACCCUGAACGCG	1.32	2.45	0.538776	5S_rRNA
UGUAGAAUAAGUGGGAGGCCC	1.32	2.45	0.538776	28S
CGUACGUAGCAGAGCAG	6.2	11.52	0.538194	28S
CUAAUAGGGAACGUGAGCUGG	3.95	7.35	0.537415	28S
AUCAGAUACCGUCGUAGUUCCG	6.95	12.99	0.535027	18S
GAAUGAUUAGAGGUCUUGGGG	3.01	5.64	0.533688	28S
CACUAAUAGGGAACGUGAGC	1.69	3.19	0.529781	28S
CGGCCGAUCGAAAGGGAG	1.69	3.19	0.529781	28S
CUAGAGGAAGUAAAAGUCGU	1.69	3.19	0.529781	18S
GCAGAAUUCACCAAGCGUUGGA	1.69	3.19	0.529781	28S
AUCAAGAACGAAAGUCGGAGG	7.52	14.22	0.528833	18S
UCUCGUCGCGCGCGCGUCCG	3.76	7.11	0.528833	28S
GGGGCUACGCCUGUCUGAGCGUCGCUU	9.58	18.14	0.528115	5.8S
AAAUCGGUCGUCCGACCUGGGUA	2.07	3.92	0.528061	28S
AAGGGACGGGCGAUGGCCU	2.07	3.92	0.528061	28S
AGAAGACCCUGUUGAGCUUGACUCUAG	2.07	3.92	0.528061	28S
GAACGGGCUUGGCGGAAU	4.13	7.84	0.526786	28S
AACGAAAGUCGGAGGUUCGAAGACGA	4.51	8.58	0.525641	18S
AAGGAAUUGACGGAAGGGCACC	7.7	14.71	0.523453	18S
CGCACGGCCGGUACAGUG	2.82	5.39	0.523191	18S
GUGUAGAAUAAGUGGGAGGCCCCCG	2.82	5.39	0.523191	28S
ACCAGGAGUGGAGCCUGCGGCUUA	4.7	9.07	0.518192	18S
AACGAGAACUUUGAAGGCCGAA	5.83	11.28	0.516844	28S
AAACUGCGAAUGGCUCAUUA	8.46	16.42	0.515225	18S
GAACGAAAGUCGGAGGUUCGAAGACG	10.33	20.1	0.51393	18S
UUAGUGACGCGCAUGAAUGG	4.51	8.82	0.511338	28S
UCGGUCGGGCUGGGGCGCGAAGCGG	1.88	3.68	0.51087	28S
ACGAACGAGACUCUGGCAUGCUAAC	2.63	5.15	0.51068	18S
AGAACUGGCGCUGCGGGAUG	1.5	2.94	0.510204	28S
CCUAAGGCGAGCUCAGGGAGGA	1.5	2.94	0.510204	28S
UUUUCGGAACUGAGGCCAUG	1.5	2.94	0.510204	18S
CCAGGAGUGGAGCCUGCGGCUUA	5.45	10.79	0.505097	18S
ACGGCCCUGGCGGAGCGCUGAGAAGACG	48.29	96.58	0.5	18S
AAGUCGGAGGUUCGAAGACGA	5.26	10.54	0.499051	18S
AGAUGUCCGGGGCUGCACG	2.44	4.9	0.497959	18S
UCGUCUGAUCUCGGAAGCUAAGCAGGG	2.44	4.9	0.497959	5S_rRNA
CGCGACCUCAGAUCAGACGUGGCG	37.77	75.99	0.497039	28S
AAAUCGGUCGUCCGACCUGGGUAUA	2.07	4.17	0.496403	28S
AACGAGAACUUUGAAGGCCGA	2.07	4.17	0.496403	28S
AACAGCAGUUGAACAUGGGUC	4.13	8.33	0.495798	28S
AAACUGCGAAUGGCUCAUUAA	7.14	14.46	0.493776	18S
AAAGUCGGAGGUUCGAAGACGAU	3.38	6.86	0.492711	18S
CGUACGUAGCAGAGCAGC	3.38	6.86	0.492711	28S
AACGGGCUUGGCGGAAUC	1.69	3.43	0.492711	28S
AAUCAAGAACGAAAGUCGGAGGUUCG	1.69	3.43	0.492711	18S
AGAACGAAAGUCGGAGGUUCG	1.69	3.43	0.492711	18S
AGGGAUAACUGGCUUGUG	1.69	3.43	0.492711	28S
GCCCCGGCCGGGGGGCGGGCGCCG	1.69	3.43	0.492711	18S
UUCUUAGAGGGACAAGUGGCGUU	1.69	3.43	0.492711	18S
AACGAGACUCUGGCAUGCUAACUAGU	3.01	6.13	0.491028	18S
CCAAGCGUUGGAUUGUUCACC	3.01	6.13	0.491028	28S
AACGAGAACUUUGAAGGCCGAAG	25.74	52.46	0.49066	28S
AUCAGAUACCGUCGUAGUU	5.64	11.52	0.489583	18S
AAGGGCAAAAGCUCGCUUGAUCUUGAU	1.32	2.7	0.488889	28S
ACCCGGGGAGGUAGUGACGAAAAA	1.32	2.7	0.488889	18S
CGCGGGCCCGGGUGGAGCCGCCGCA	1.32	2.7	0.488889	28S
GUCGGGGUUUCGUACGUAGCAGA	1.32	2.7	0.488889	28S
UCUGAUCUCGGAAGCUAAGCA	1.32	2.7	0.488889	5S_rRNA
CCCGGGGCUACGCCUGUCUGAGCGUCGCU	3.95	8.09	0.488257	5.8S
CGAACGAGACUCUGGCAUGCUAACUAG	2.63	5.39	0.487941	18S
AAAGUCGGAGGUUCGAAGACGAUCAG	5.26	10.79	0.487488	18S
CCAAGGGAACGGGCUUGGCGGAA	6.2	12.75	0.486275	28S
CCGAAGGGACGGGCGAUGGC	6.2	12.75	0.486275	28S
UCGAAAGGGAGUCGGG	8.64	17.89	0.482951	28S
CCGAAGGGACGGGCGAUGGCCU	3.76	7.84	0.479592	28S
AGCAGGACGGUGGCCAUGGA	2.82	5.88	0.479592	28S
AAGAAGACCCUGUUGAGCU	1.88	3.92	0.479592	28S
CGGGUAAACGGCGGGAG	1.88	3.92	0.479592	28S
AAGGAGUCUAACACGUGCGCGAGUCGG	8.08	16.91	0.477824	28S
[truncated: 2,899 more rows]

## Sheet: tRNA
Sequence	Nuclear	Cytoplsamic	N/C	Gene
UAACGGGAUCGAUGCCUGCA	8.64	0	N.A.	tRNA-derived_pseudogene
GACCGCGUUGCCUAAUGGAUAA	8.46	0	N.A.	tRNAArg-TCG
GACCGCGUGGCCUAAUGGAUA	7.14	0	N.A.	tRNAArg-TCG
GGCGCCGUGGCUUAGUUGGU	3.57	0	N.A.	tRNAThr-AGT
AUGGAUAACGCGUCUGACUACGG	2.63	0	N.A.	tRNAArg-ACG,tRNA-derived_pseudogene
UCAGUCUCAUAAUCUGAAGGUCG	2.25	0	N.A.	tRNAMet-CAT
GACCGCGUCGCCUAAUGGAUAA	2.07	0	N.A.	tRNAArg-TCG
GACCACGUGGCCUAAUGGAUAA	1.88	0	N.A.	tRNAArg-TCG
GGGGAUGUAGUUCAGUGGUAGAG	1.88	0	N.A.	tRNAAla-TGC,tRNAAla-CGC,tRNAAla-AGC
UGGUGCUGAUAACGCCAAGGUCGCGGGU	0	85.06	0	tRNAIle-AAT
UGGGGUGCGAGAGGUCCCGGGU	0	83.1	0	tRNAPro-CGG,tRNAPro-AGG,tRNAPro-TGG
UAGGGGUAUGAUUCUCGC	0	74.52	0	tRNAPro-AGG,tRNAPro-CGG,tRNAPro-TGG
UGGGAUGCGAGAGGUCCCGGGU	0	59.32	0	tRNAPro-AGG
GGGGUAUGAUUCUCGGU	0	57.85	0	tRNAPro-TGG
UCGACUCCCGGUGUGGGAACCA	0	54.91	0	tRNAGlu-TTC
UCGGGUGCGAGAGGUCCC	0	52.21	0	tRNAPro-CGG
GGCUCUGUGGCGCAAUGGAUAGCGCAUUG	0	51.72	0	tRNAArg-TCT
UCGUAUCCUGUUCGUGACGCCA	0	45.1	0	tRNASer-CGA
GCGCCGCUGGUGUAGUGGUAUCAUUCAA	0	41.43	0	tRNAGly-CCC
UCGGUGCGAGAGGUCCCGGGU	0	35.05	0	tRNAPro-TGG
GUUGGUUAGAGCUUGGUG	0	34.56	0	tRNAIle-AAT
AGGGGUAUGAUUCUCGG	0	32.6	0	tRNAPro-TGG
AGUGGCUAGGAUUCGGCGC	0	27.21	0	tRNAGlu-TTC,tRNA-derived_pseudogene
AGGAUGGCCGAGCGGUCUAAG	0	25.49	0	tRNALeu-CAG
UUCAUGUCCCUGUUCGGGCGCCA	0	25.49	0	tRNALys-TTT
UCGGCUAGAGCUUGGUGC	0	24.76	0	tRNAIle-AAT
UGGCUUCCUAAGCCAGGGAUUGUGGGU	0	24.02	0	tRNAArg-CCT
GCCCGGCUAGCUCCGUCGGUAGAGCAUGGG	0	23.29	0	tRNALys-CTT
UUGGGUGCGAGAGGUCCC	0	22.8	0	tRNAPro-TGG
GGGGAUGUAGCUCAGUGGUAGAGCACAU	0	22.06	0	tRNAAla-TGC,tRNAAla-CGC,tRNAAla-AGC
UGGUUAGGAUUCGGCGCUCU	0	21.82	0	tRNA-derived_pseudogene,tRNAGlu-CTC
UUCGUGCCUCACCUGGAGCACCA	0	21.82	0	tRNAIle-TAT
UUGGGAUGCGAGAGGUCCCGGGU	0	20.84	0	tRNAPro-AGG
GGGUAUGAUUCUCGGU	0	20.59	0	tRNAPro-TGG
AGUCGGUAGAGCAUCAGAA	0	20.1	0	tRNALys-TTT
GGGUAUAGCUCAGCGGUAGAGCG	0	20.1	0	tRNAAla-AGC
GCCCGGCUAUCUCAGUCGGUAGAGCAUGGG	0	19.86	0	tRNALys-CTT
CGGUUUCGUAAACCGAAGAUCGCGGGU	0	18.63	0	tRNAThr-CGT
UUGGUGCGAGAGGUCCCGGGU	0	18.14	0	tRNAPro-TGG
AGUCGGUAGAGCAUCAGACUUU	0	17.65	0	tRNALys-TTT
GGGGGUAUAGCUCAGUGGUAGAGCGUU	0	17.4	0	tRNACys-GCA
AGUUGGUAGAGCAUCAGA	0	17.16	0	tRNALys-TTT,tRNA-derived_pseudogene
UCGGAUCCUGUUCGUGACGCCA	0	17.16	0	tRNASer-CGA
GCCUGGAUAGCUCAGUUGGUAGAGCAUCA	0	16.91	0	tRNALys-TTT
UGGUAGAGCAUUUGACUGCAGAUC	0	16.91	0	tRNACys-GCA
UUCGUGCCCACCCAGGGACGCCA	0	16.67	0	tRNAAsn-GTT
GGGGAAUUAGCUCAAAUGGUAGAGCUCUC	0	15.93	0	tRNAAla-AGC
UCGUAACUGGGCGGAAACACCA	0	15.93	0	tRNAVal-CAC
CAGUGGUAGAGCGCAUG	0	15.2	0	tRNAAla-CGC,tRNAAla-TGC,tRNAAla-AGC
UUUGGGUGCGAGAGGUCCCGGGU	0	14.95	0	tRNAPro-TGG
AUCGGGCGGAAACACCA	0	14.46	0	tRNAVal-AAC,tRNAVal-CAC,tRNA-derived_pseudogene
GCCUGGCUAGCUCAGUCGGUAGAGCAUGGG	0	13.97	0	tRNALys-CTT
GCGCCGCUGGUGUAGUGGUAUCAUGCCA	0	13.73	0	tRNAGly-CCC
GGGGGUGUAGCUCAGUGGUAGAGCGUA	0	13.48	0	tRNAVal-AAC
CAGUCGGUAGAGCAUCAGU	0	13.24	0	tRNALys-TTT
GCCCGGCUAGCUCAGUCUGUAGAGCAUGGG	0	13.24	0	tRNALys-CTT
UGGAUAAGGCAUUGGCAUC	0	13.24	0	tRNAArg-CCT
GGGGAAUUAGCUCAAAUGGUAGAGC	0	12.99	0	tRNAAla-AGC
UCGUAUCCCACCUUCGUCGCCA	0	12.99	0	tRNASer-GCT
AGGAUUCGGCGCUUUCA	0	12.75	0	tRNA-derived_pseudogene,tRNAGlu-TTC
CCGGAGCUGGGGAUUGUGGGUU	0	12.75	0	tRNAArg-CCG
GCCCGGCUAGCUCAGUCGGUAGAGCAUGUU	0	12.75	0	tRNALys-CTT
CCCGGGCGGCGCACCA	0	12.5	0	tRNAGly-CCC
GGGGAUGUAGCUCAGUGGUAGAGCGUG	0	12.26	0	tRNAAla-CGC
UUCAAGUCCCUGUUCGGGCGCCA	0	12.26	0	tRNALys-TTT
GGUGCUGAUAACGCCAAGGUCGCGGGU	0	12.01	0	tRNAIle-AAT
UCGGAUCCUGUCGGCUACGCCA	0	12.01	0	tRNASer-TGA
GCCCGGCUAGCUCAGUCGGUAGAGCAUUAA	0	11.52	0	tRNALys-CTT
UCCCGGCCAACGCACCA	0	11.52	0	tRNAGly-TCC
UUCAGGUCACGUCGGGGUCACCA	0	11.52	0	tRNATrp-CCA
AGUCGGUAGAGCAUCAGACUUUUA	0	11.28	0	tRNALys-TTT
GUCCGGCUAGCUCAGUCGGUAGAGCAUGA	0	11.28	0	tRNALys-CTT
UGGAUAAGGCAUUGGCUUCC	0	11.28	0	tRNAArg-CCT
UUGGUUGCGAGAGGUCCCGGGU	0	11.28	0	tRNAPro-TGG
GGGAUUAGCUCAAAUGGUAGAGC	0	11.03	0	tRNAAla-AGC
UGACUGCAGAUCAAGAGGUCCCUGGU	0	11.03	0	tRNACys-GCA
CAGUGGUAGAGCGUGC	0	10.3	0	tRNAAla-CGC
GGGGAUGUAACUCAGUGGUAGAGCGCAU	0	10.3	0	tRNAAla-AGC,tRNAAla-TGC,tRNAAla-CGC
GGGGAUGUAACUCAGUGGUAGAGCGCAUG	0	10.3	0	tRNAAla-TGC,tRNAAla-AGC,tRNAAla-CGC
UCGUAAACCGAAGAUCGCGGGU	0	10.3	0	tRNAThr-CGT
UCGUUCCCCGUACGGGCCACCA	0	10.3	0	tRNAIle-AAT
UGGGUGCGAGAGGUCCCGGGU	0	10.3	0	tRNAPro-TGG
CCAAUGGAGGCGUGGGU	0	10.05	0	tRNALeu-CAA
GCCCGGCUAGCUCAGUCGGUCGAGCAUGGG	0	10.05	0	tRNALys-CTT
ACCCUGCUCGCUGCGCCA	0	9.81	0	tRNASer-TGA
GGGGGAUUAGCUCAAAUGGUAGAGCUCUCU	0	9.81	0	tRNAAla-AGC
UGGAUAAGGCACUGGCUUC	0	9.81	0	tRNAArg-CCT
GCCCGGCUAGCUCAGUAGGUAGAGCAUGGG	0	9.56	0	tRNALys-CTT
GCCCGGCUAGCUCAGUCGGUAUAGCAUGGG	0	9.56	0	tRNALys-CTT
GGGGUGUAGCUCAGUGGUAGAGCGU	0	9.56	0	tRNAVal-AAC
UCGGUUGCGAGAGGUCCCGGGU	0	9.56	0	tRNAPro-CGG
UUAAUCUCAGGGUCGUGGGU	0	9.56	0	tRNALys-CTT,tRNA-derived_pseudogene
UGACUGCAGAUCAAGAGGUCCCCGGU	0	9.31	0	tRNACys-GCA,tRNA-derived_pseudogene
AGCUCAGUCGGUAGAGCAUCAGACUUUU	0	9.07	0	tRNALys-TTT
AGGGGUAUGAUUCUCGGA	0	9.07	0	tRNAPro-TGG
CCGGAGCUGGGGAUUGUGGGUUU	0	9.07	0	tRNAArg-CCG
GCGCCGCUGGUGUAGUGGGAUCAUGCAA	0	9.07	0	tRNAGly-CCC
GCGCCGCUGGUGUAGUGGUAUCAUGCAAAA	0	9.07	0	tRNAGly-CCC
GCGCCGCUGGUGUAGUGGUAUCAUGCAAU	0	9.07	0	tRNAGly-CCC
GGAUAGCUCAGUCGGUAGAGCAUCA	0	9.07	0	tRNALys-TTT
GUCCCUGUCCAGGCGCCA	0	9.07	0	tRNALys-TTT
UGGUCUAGUGGUUAGGAUUCGGCGCU	0	9.07	0	tRNAGlu-CTC
CCACGUGGGAGACUCGGGUUC	0	8.82	0	tRNAGly-CCC
GCCCGGCUAGCUUAGUCGGUAGAGCAUGGG	0	8.82	0	tRNALys-CTT
GGGAUGUAGCUCAGUGGUAGAGCAU	0	8.82	0	tRNACys-GCA
GGGGAAUUAGCUCAAAUGGUAGAGCUCUCU	0	8.82	0	tRNAAla-AGC
GGGGGUAUAGCUCAGUGGUAGAGCUCGU	0	8.82	0	tRNAAla-AGC
UCAUGUCCCUGUUCAGGCGCCA	0	8.82	0	tRNALys-TTT
UGUAAUGGUUAGCACUCUGGA	0	8.82	0	tRNAGln-CTG,tRNAGln-TTG
AGCAGAGUUGCGCAGCGGAAGCGUGCUGA	0	8.58	0	tRNAMet-CAT
GCCCGACUAGCUCAGUCGGUAGAGCAUGG	0	8.58	0	tRNALys-CTT
GCGCUGCUGGUGUAGUGGUAUCAUGCAA	0	8.58	0	tRNAGly-CCC
GCGUUGGUGGUAUAGUGGUUAGCAUAGCUG	0	8.58	0	tRNAGly-TCC
UCAGAUCACGUCGGGGUCACCA	0	8.58	0	tRNATrp-CCA
CAGUUGGUAGAGCAUCAGA	0	8.33	0	tRNA-derived_pseudogene,tRNALys-TTT
CAUAAUCUGAAGGUCCUGAGU	0	8.33	0	tRNAMet-CAT
GGGGAUAUAGCUCAGGGGUAGAGCAUU	0	8.33	0	tRNACys-GCA
UUCAGGUCCCUGUUCAGGCGCCA	0	8.33	0	tRNALys-TTT
AGUUGGUAGAGCAUCAGU	0	8.09	0	tRNALys-TTT,tRNA-derived_pseudogene
CAGUUGGUAGAGCGGAGGA	0	8.09	0	tRNATyr-GTA
CUUCGGAUCAGAAGAUUGAGGGU	0	8.09	0	tRNAArg-TCG
GCUCGGCUAGCUCAGUCGGUAGAGCAUGA	0	8.09	0	tRNALys-CTT
UCAGUGGUAGAAUUCUCGC	0	8.09	0	tRNA-derived_pseudogene,tRNAGly-GCC,tRNAVal-CAC,tRNAGly-CCC
UCGGUAGAGCAUCAGAC	0	8.09	0	tRNALys-TTT
UGGAUAAGGCAUUGGCGUC	0	8.09	0	tRNAArg-CCT
UGGUUAGGAUUCGGCGCUCUCACCGCC	0	8.09	0	tRNAGlu-CTC,tRNA-derived_pseudogene
UGUCCCUGUUCGGGCGCCA	0	8.09	0	tRNALys-TTT
ACCCGGCUAGCUCAGUCGGUAGAGCAUGGG	0	7.84	0	tRNALys-CTT
AGUGGUAGAGCGCGUGCUUCG	0	7.84	0	tRNAAla-CGC
GCCCGGCUAGAUCAGUCGGUAGAGCAUGGG	0	7.84	0	tRNALys-CTT
GGCUCUCUGGCGCAAUGGAUAGCGCAUUG	0	7.84	0	tRNAArg-TCT
GGGGGUGUAGCUCAGUGGUCGAGCGU	0	7.84	0	tRNAVal-AAC
GUCCCACCAGAGUCGCCA	0	7.84	0	tRNAArg-TCT
UCGAUCCCCGUACGGGCCACCA	0	7.84	0	tRNAIle-AAT
CACUCUGGACUUUGAAUC	0	7.6	0	tRNAGln-TTG
GCCCGGCUAGCUCAGUCGGUAGAGCAUGAU	0	7.6	0	tRNALys-CTT
GCGCCGCUGGUGUAGUGGUAUCCUGCAA	0	7.6	0	tRNAGly-CCC
GGGGAUGUAGCUCAGUGGUAGAGCUCGCG	0	7.6	0	tRNAAla-CGC
UCAAUCCCCGGCAUCUCCACCA	0	7.6	0	tRNAAla-CGC,tRNAAla-TGC
UGGUAGAAUUCUCGCCUCC	0	7.6	0	tRNAGly-CCC,tRNA-derived_pseudogene
UUGGUGGUUCGAGCCCACCCAGGGACGCCA	0	7.6	0	tRNAAsn-GTT
GCCCGGCUAGCUCAGUCGGUAGAGCAGGGG	0	7.35	0	tRNALys-CTT
GCGCCGCUGGGGUAGUGGUAUCAUGCAA	0	7.35	0	tRNAGly-CCC
GCGUCGCUGGUGUAGUGGUAUCAUGCAA	0	7.35	0	tRNAGly-CCC
GGCUCUGUAGCGCAAUGGAUAGCGCAUUG	0	7.35	0	tRNAArg-TCT
GGGGGUGUAGCUCAGUGGUAGAGCUCGUU	0	7.35	0	tRNAAla-AGC,tRNAAla-CGC
GGGUAUAGCUCAGUGGUAGAGCG	0	7.35	0	tRNAAla-AGC
AGUUGGGAGAGCUUUAGACUGAA	0	7.11	0	tRNAPhe-GAA
GCCCGGCCAGCUCAGUCGGUAGAGCAUGGG	0	7.11	0	tRNALys-CTT
GCCCGGCUAGCUCAGUCGGUAGAGCAUAGG	0	7.11	0	tRNALys-CTT
GCCCGGCUAGCUCAGUCGGUAGCGCAUGGG	0	7.11	0	tRNALys-CTT
GGCUCCGUGGCGCAAUGGAUAGCGCAUUU	0	7.11	0	tRNAArg-TCT
GGGGGUGUAACUCAGUGGUAGAGCGCGUG	0	7.11	0	tRNAAla-AGC,tRNAAla-CGC
UCGGAUCCCACCUUCGUCGCCA	0	7.11	0	tRNASer-GCT
AUGGAUAGCGCAUUGGA	0	6.86	0	tRNAArg-TCT,tRNA-derived_pseudogene
CCGGCUAGCUCAGUCGGUAG	0	6.86	0	tRNALys-CTT
CCGUAUGGAGGCGUGGGU	0	6.86	0	tRNALeu-CAA
CUAAGCCAGGGAUUGUGGGUA	0	6.86	0	tRNAArg-CCT
GCAGCGGAAGCGUGCUG	0	6.86	0	tRNAMet-CAT,tRNAThr-CGT
GGGGUGCGAGAGGUCCCGGGU	0	6.86	0	tRNAPro-CGG,tRNAPro-AGG,tRNAPro-TGG
GGUGUAAUGGUUAGCACUCUGGA	0	6.86	0	tRNAGln-CTG,tRNAGln-TTG
UGGUAGAGCAUUUGACUGCAGAU	0	6.86	0	tRNACys-GCA
AGCAGAGUGGCGCAGCGGAAGCGUGCUU	0	6.62	0	tRNAMet-CAT
GCCCGGCUAGCUCAGUCGGUAGAGCAUCGG	0	6.62	0	tRNALys-TTT,tRNALys-CTT
GGGGGAUUAGCUCAAAUGGUAGAGCACUC	0	6.62	0	tRNAAla-AGC
GGUUUCGUAAACCGAAGAUCGCGGGU	0	6.62	0	tRNAThr-CGT
UCAGCCUCCGGAGCUGGGGAUUGUGGGU	0	6.62	0	tRNAArg-CCG
UUCGAGCCCACCCAGGGACGCCA	0	6.62	0	tRNAAsn-GTT
CAGUUGGUAGAGCAUCAGAC	0	6.37	0	tRNALys-TTT,tRNA-derived_pseudogene
GCCCAGCUAGCUCAGUCGGUAGAGCAUGGG	0	6.37	0	tRNALys-CTT
GCCCGGAUAACUCAGUCGGUAGAGCAUCA	0	6.37	0	tRNALys-TTT
GCCCGUCUAGCUCAGUCGGUAGAGCAUG	0	6.37	0	tRNALys-CTT
GCGCUGGUGUAGUGGUAUCAUGCAA	0	6.37	0	tRNAGly-CCC
GGCUCUGUCGCGCAAUGGAUAGCGCAUUG	0	6.37	0	tRNAArg-TCT
UCGAAUCCCACUUCUGACACCA	0	6.37	0	tRNALeu-CAG,tRNALeu-CAA
UCGCCUGCCACGCGGGAGGCCCGGGU	0	6.37	0	tRNAGly-GCC
UUCGAGCCUCACCUGGAGCACCA	0	6.37	0	tRNAIle-TAT
ACCGUGCGGAAACACCA	0	6.13	0	tRNAVal-TAC,tRNA-derived_pseudogene,tRNAVal-AAC,tRNAVal-CAC
GCACGGCUAGCUCAGUCGGUAGAGCAUGGG	0	6.13	0	tRNALys-CTT
GCGCCGCUGGUGUAGUGGUAUCAUGUAA	0	6.13	0	tRNAGly-CCC
GGGGGUAUAGCUCAGCGGUAGAGAGCGU	0	6.13	0	tRNAAla-AGC
UAGAAUUCUCGCCUGCCACG	0	6.13	0	tRNAGly-GCC
UCAAUCCCCGGCACCUCCACCA	0	6.13	0	tRNAAla-AGC
UCGGUUCCGGCUCGAAGGACCA	0	6.13	0	tRNATyr-GTA
UGGAUAAGGCGUCUGA	0	6.13	0	tRNAArg-TCG,tRNAArg-CCG
UGGGUGGUUCAGUGGUAGAAU	0	6.13	0	tRNAGly-GCC
AGUGGUUAGGAUUCUGCGC	0	5.88	0	tRNAGlu-CTC,tRNA-derived_pseudogene
CAGCUGGUAGAGCGGAGGA	0	5.88	0	tRNATyr-GTA
CCCCGGCACCUCCACCA	0	5.88	0	tRNAAla-TGC,tRNAAla-AGC
CCGUAGCUGGGGAUUGUGGGU	0	5.88	0	tRNAArg-CCG
CUCAGUGGUAGAGCAU	0	5.88	0	tRNACys-GCA,tRNA-derived_pseudogene
GCCCGGCUAGCUCUGUCGGUAGAGCAUGGG	0	5.88	0	tRNALys-CTT
GGGGGGGUAGCUCAGUGGUAGAGCGU	0	5.88	0	tRNAVal-AAC
GGGGGUGUAGCUCAGUGGUAGAGCACAU	0	5.88	0	tRNAAla-TGC
GGGGGUGUAGCUCAGUGGUAGAGCGCGGG	0	5.88	0	tRNAAla-CGC,tRNAAla-AGC
GUCCGGAUAGCUCAGUCGGUAGAGCAUCA	0	5.88	0	tRNALys-TTT
UAGAAUUCUCGCCUGCCACGC	0	5.88	0	tRNAGly-GCC
UCGGUCCCGGGCGGAAACACCA	0	5.88	0	tRNAVal-CAC
UGGUCUAGGGGUAUGAUUC	0	5.88	0	tRNAPro-TGG,tRNAPro-AGG,tRNAPro-CGG
UUCCCGGCAUCUCCACCA	0	5.88	0	tRNAAla-CGC,tRNAAla-TGC
AUAAUCUGAAGGUCCUGAGU	0	5.64	0	tRNAMet-CAT
CCCCGGCUAGCUCAGUCGGUAGAGCAUGGG	0	5.64	0	tRNALys-CTT
GCCCGGCUAGCUCAGUCGGCAGAGCAUGA	0	5.64	0	tRNALys-CTT
GCCUGGAUAGCUCAGUUGGUAGAGCAUCAG	0	5.64	0	tRNALys-TTT
GCGCCCCUGGUGUAGUGGUAUCAUGCAA	0	5.64	0	tRNAGly-CCC
GCUUCUGUAGUGUAGUGGUUAUCACGUUCG	0	5.64	0	tRNAVal-CAC
GGGGGAUUAGCUCAAAUGGUAGAGAGCUC	0	5.64	0	tRNAAla-AGC
UCAUUUCUCGCUGGGGCCUCCA	0	5.64	0	tRNAThr-TGT
UGGAUAAGGCAUUGGC	0	5.64	0	tRNAArg-CCT
UGGUAGAGCAUUUGACUGCACAUC	0	5.64	0	tRNACys-GCA
UGGUAGAGCGCAUGCUUUGC	0	5.64	0	tRNAAla-TGC
UGGUAGAGCGCAUGCUUUGCA	0	5.64	0	tRNAAla-TGC
AGCAGAGUGGCGCAGCGGAAGCGUGCUGAA	0	5.39	0	tRNAMet-CAT
AGUUGGUAGAGCGGAGGA	0	5.39	0	tRNATyr-GTA
CCGGUUCGAAACCGGGCAGAAGCACCA	0	5.39	0	tRNAVal-CAC
CGGUUAGGAUUCCUGGUUUUCA	0	5.39	0	tRNAGlu-TTC
GCCCGGCUAGCUCAGUCGUUAGAGCAUGA	0	5.39	0	tRNALys-CTT
GCUCGGAUAGCUCAGUCGGUAGAGCAUCA	0	5.39	0	tRNALys-TTT
GGUGGUUCAGUGGUAGAA	0	5.39	0	tRNAVal-CAC,tRNAGly-CCC,tRNA-derived_pseudogene,tRNAGly-GCC
GUCGGCUAGAGCUUGGUGC	0	5.39	0	tRNAIle-AAT
UCGUAUCCCAGCGGUGCCUCCA	0	5.39	0	tRNAThr-AGT
UGGACAUAUGUCCGCGUGGGUU	0	5.39	0	tRNALeu-TAA
UUCAAAUCACGUCGGGGUCACCA	0	5.39	0	tRNATrp-CCA
AACCGGGCGGAAACAUCA	0	5.15	0	tRNAVal-AAC,tRNA-derived_pseudogene,tRNAVal-CAC
AGUGGCUAGGAUUCGGCGCU	0	5.15	0	tRNAGlu-TTC,tRNA-derived_pseudogene
AGUGGUUAGGAUUCGGCGCUCUCACCGCC	0	5.15	0	tRNAGlu-CTC
CAAAUCCCGGACGAGCCCCCA	0	5.15	0	tRNAPro-CGG,tRNAPro-TGG,tRNAPro-AGG
CUAAUGGAUAAGGCACU	0	5.15	0	tRNAArg-CCT
GCCCGGCUAGCUCAGUCAGUAGAGCAUGGG	0	5.15	0	tRNALys-CTT
GCCCGGCUAGCUCAGUCGGUGGAGCAUGGG	0	5.15	0	tRNALys-CTT
GCCCUGCUAGCUCAGUCGGUAGAGCAUGGG	0	5.15	0	tRNALys-CTT
GCCUGGGUAGCUCAGUUGGUAGAGCAUCA	0	5.15	0	tRNALys-TTT
GGGAUUAGCUCAAAUGGUAGAGCGCUCGC	0	5.15	0	tRNAAla-AGC
UCGAAUCCCACUCCUGACACCA	0	5.15	0	tRNALeu-CAG
UGAGACUCUUAAUCUCAGGGUCGUGGGU	0	5.15	0	tRNA-derived_pseudogene,tRNALys-CTT
UGGAUAAGGCAUUGGCA	0	5.15	0	tRNAArg-CCT
UGGUGCUGAUAACGCCAAGGUCGCGGGUU	0	5.15	0	tRNAIle-AAT
UUCAGUGGUAGAAUUCUCGC	0	5.15	0	tRNAGly-GCC,tRNA-derived_pseudogene,tRNAVal-CAC,tRNAGly-CCC
ACUCCAGAUCAGAAGGUUGCGUGUU	0	4.9	0	tRNATrp-CCA
AGUUGGUAGAGCGGAGGAC	0	4.9	0	tRNATyr-GTA
CCGGCUAGCUCAGUCGGUAGAGCAUUAG	0	4.9	0	tRNALys-CTT
GACCGGCUAGCUCAGUCGGUAGAGCAUGGG	0	4.9	0	tRNALys-CTT
GCAUUGGUGGUUCAGUGGUAGAAUUUUC	0	4.9	0	tRNAGly-GCC,tRNAGly-CCC
GCCCGGCUAACUCAGUCGGUAGAGCAUGAA	0	4.9	0	tRNALys-CTT
GCCCGGCUAGCUCAGUCGGUAGAGCGUGGG	0	4.9	0	tRNALys-CTT
GGGAUGCGAGAGGUCCCGGGU	0	4.9	0	tRNAPro-AGG
GGGAUUAGCUCAAAUGGUAGAGCUCUCGC	0	4.9	0	tRNAAla-AGC
GGGGGCGUAGCUCAGUGGUAGAGCGU	0	4.9	0	tRNAVal-AAC
GGGGGUGUAGCUCAGUGGUAGAGCGUAU	0	4.9	0	tRNAVal-AAC
GUCGGCUAGAGCAUGGUG	0	4.9	0	tRNAIle-AAT
UAGUGGUAUGAUUCUCGCU	0	4.9	0	tRNAPro-TGG
UCGGUAGAGCAUGGGACU	0	4.9	0	tRNALys-CTT
UGGGGUGCGAGAGGUCCCGGG	0	4.9	0	tRNAPro-TGG,tRNAPro-CGG,tRNAPro-AGG
UUGGUAGAGCGGAGGACUG	0	4.9	0	tRNATyr-GTA
AGCAGAGUGGCGCAGCGGAAGCGUGCUGU	0	4.66	0	tRNAMet-CAT
AGUGGUUAGGAUUCGGCGCA	0	4.66	0	tRNAGlu-CTC,tRNA-derived_pseudogene
AUCCCCGGCAUCUCCACCA	0	4.66	0	tRNAAla-CGC,tRNAAla-TGC
CCUCGGUUCGAAUCCGAGUCACGGCACCA	0	4.66	0	tRNAHis-GTG
CCUGUUCGUGACGCCA	0	4.66	0	tRNASer-CGA
GCCCGGCUAGCUCAGUCCGUAGAGCAUGGG	0	4.66	0	tRNALys-CTT
GCGCCGCUGGUGUAGUGGUAUCAUUCAAG	0	4.66	0	tRNAGly-CCC
GCUCAGUCGGUAGAGCAUGAGACUCA	0	4.66	0	tRNALys-CTT
GGGGAUGUAGCUCAGUGGGAGAGCGCAU	0	4.66	0	tRNAAla-CGC,tRNAAla-TGC,tRNAAla-AGC
GGGGGUGUACCUCAGUGGUAGAGCGCGUG	0	4.66	0	tRNAAla-CGC,tRNAAla-AGC
GGGGGUGUAGCUCAGUGGUAGAGCCCGUG	0	4.66	0	tRNAAla-AGC,tRNAAla-CGC
GGGUGUAGCUCAGUGGUAGAGCGUG	0	4.66	0	tRNAVal-AAC,tRNAAla-AGC,tRNAAla-CGC
UCCCCGGCAUCUCCACUA	0	4.66	0	tRNAAla-TGC,tRNAAla-CGC
UUCGUUUCCCGGUCAGGGAACCA	0	4.66	0	tRNAGlu-CTC,tRNAGlu-TTC,tRNA-derived_pseudogene
UUGGUAGAGCGGAGGAC	0	4.66	0	tRNATyr-GTA
AGAUCAGAAGGCUGCGUGU	0	4.41	0	tRNATrp-CCA
AGGGUUCACGUCCCUGUUCGGGCGCCA	0	4.41	0	tRNALys-TTT
AGUGGCUAGGAUUCUGCG	0	4.41	0	tRNAGlu-TTC,tRNA-derived_pseudogene
AUCUCGGUGGAACCUCCA	0	4.41	0	tRNAGln-CTG
CUAAGCUAGGGAUUGUGGGU	0	4.41	0	tRNAArg-CCT
GAACCGGGCGGAAACACCA	0	4.41	0	tRNA-derived_pseudogene,tRNAVal-AAC,tRNAVal-CAC
GCCCCAGUGGCCUAAUGGAUAAGGCACUG	0	4.41	0	tRNAArg-CCT
GCCCGGCUAACUCAGUCGGUAGAGCAUGUG	0	4.41	0	tRNALys-CTT
GCGCCGCUGAUGUAGUGGUAUCAUGCAA	0	4.41	0	tRNAGly-CCC
GGGGAUGUAGCUCAGUGGUAGAGCGCCU	0	4.41	0	tRNAAla-TGC,tRNAAla-AGC,tRNAAla-CGC
GGGGAUGUAGCUCAGUGGUAGAGCGCGC	0	4.41	0	tRNAAla-CGC
GGGGGUGUAGCUCAGUGGUAGAUCGU	0	4.41	0	tRNAVal-AAC
GUCGGCUAGAGCGUGGUG	0	4.41	0	tRNAIle-AAT
UCGGUAGAGCAUGGGACA	0	4.41	0	tRNALys-CTT
UGGCUUCCUAAGCCAGGGAUUGUGGGUU	0	4.41	0	tRNAArg-CCT
UGGGGUGUAGCUCAGUGGUAGAGCGU	0	4.41	0	tRNAVal-AAC
UGGUCUAGGGGUAUGAUUCUCGGU	0	4.41	0	tRNAPro-TGG
AGUGGUUAGGAUUCGUCGC	0	4.17	0	tRNAGlu-CTC,tRNA-derived_pseudogene
AUGGAUAAGGCAUUGGCUUCC	0	4.17	0	tRNAArg-CCT
AUGGAUAAGGCUUCUGA	0	4.17	0	tRNAArg-TCG,tRNAArg-CCG
CAGGAUGGCCGAGCGGUCUAAG	0	4.17	0	tRNALeu-CAG
CCGGGGUUCGAUUCCCCGACGGGGAGCCA	0	4.17	0	tRNAAsp-GTC
CUGAAUCCAGCGAUCCGAGU	0	4.17	0	tRNAGln-CTG
CUGAUAACGCCAAGGUCGCGGGU	0	4.17	0	tRNAIle-AAT
GCCAGGCUAGCUCAGUCGGUAGAGCAUGGG	0	4.17	0	tRNALys-CTT
GCCCGACUAGCUCAGUCGGUAGAGCAUGUG	0	4.17	0	tRNALys-CTT
GCCCGGCUAGCUCAGUCGGUAGAGCAUGCG	0	4.17	0	tRNALys-CTT
GCGCCGCUGGUGUAGUGGCAUCAUGCAA	0	4.17	0	tRNAGly-CCC
GGAUUCGGCGCUCUCACCGCCGCGGCCC	0	4.17	0	tRNAGlu-CTC
GGGGGUAUAGCUCAGCGGUAGAGAGCGUG	0	4.17	0	tRNAAla-AGC
GGGGGUAUAGCUCAGGGGUAGAGCACU	0	4.17	0	tRNACys-GCA
GGGGGUGUAGCUCAUUGGUAGAGCGU	0	4.17	0	tRNAVal-AAC
GGGUAUAGCUCAGCGGUAGAGCGCGUGC	0	4.17	0	tRNAAla-AGC
GUGGCGCAGCGGAAGCGUGCUG	0	4.17	0	tRNAMet-CAT
GUGGGUAGAGCAUUUGACUGC	0	4.17	0	tRNACys-GCA
UCAAGCGAUCCGAGUUCA	0	4.17	0	tRNA-derived_pseudogene
UCAGGUCCCUGUCCAGGCGCCA	0	4.17	0	tRNALys-TTT
UCCUCGUUAGUAUAGUGGUGAGUAUCCCU	0	4.17	0	tRNAAsp-GTC
UCGAAACCGGGCGGAAACAUCA	0	4.17	0	tRNAVal-AAC,tRNAVal-CAC
UCGAAUCUUGCCGACUACGCCA	0	4.17	0	tRNASer-AGA,tRNASer-TGA
UCGAAUUCUGCCGACUACGCCA	0	4.17	0	tRNASer-AGA,tRNASer-TGA
UCGGCUGCGAGAGGUCCCGGGU	0	4.17	0	tRNAPro-CGG
UCGGUGCGAGAGGUCCC	0	4.17	0	tRNAPro-TGG
UUAAUCUGAGGGUCCAGGGU	0	4.17	0	tRNA-derived_pseudogene,tRNALys-TTT
AGCAGAGUGGCGCAGCGGAAGCGUACUGG	0	3.92	0	tRNAMet-CAT
AGUCGGUAGAGCAUCAGAU	0	3.92	0	tRNALys-TTT
AUCUCACCUUCGUCGCCA	0	3.92	0	tRNASer-GCT
CGCCGCUGGUGUAGUGGUAUCAUGCAA	0	3.92	0	tRNAGly-CCC
CGGUAGAGCAUGGGAC	0	3.92	0	tRNALys-CTT
CUCGGUUCGUAUCCGAGUCACGGCACCA	0	3.92	0	tRNAHis-GTG
GCAUGCACGAGGUCCUGGGU	0	3.92	0	tRNAAla-AGC
GCCCGGCUAGCUCAGUCGGUAGAGCAUGGC	0	3.92	0	tRNALys-CTT
GCCCGGCUAGCUCAGUCGGUAGAUCAUG	0	3.92	0	tRNALys-CTT
GCCCGGCUAGCUCAGUCGGUAGGGCAUGGG	0	3.92	0	tRNALys-CTT
GCCCGGCUAGCUCAGUCGGUAUAGCAUGA	0	3.92	0	tRNALys-CTT
GGGGGUAUAGCUCAGCGGUAGAGCUCGU	0	3.92	0	tRNAAla-AGC
GGGGGUAUAGCUCAGUGGUAGAGCACGUG	0	3.92	0	tRNAAla-AGC
GGUAUAGCUCAGCGGUAGAGCG	0	3.92	0	tRNAAla-AGC
GGUCUAGGGGUAUGAUUCUCGGU	0	3.92	0	tRNAPro-TGG
GGUGCGAGAGGUCCCGGGU	0	3.92	0	tRNAPro-CGG,tRNAPro-TGG,tRNAPro-AGG
UAGUGGUAUGAUUCUCGC	0	3.92	0	tRNAPro-TGG
UCGAUCCCCGUACUGGCCACCA	0	3.92	0	tRNAIle-AAT
UCGGAUGCGAGAGGUCCCGGGU	0	3.92	0	tRNAPro-AGG,tRNAPro-CGG
UCGGGUGCGAGAGGUCCCG	0	3.92	0	tRNAPro-CGG
UCGUUGGUCUAGGGGUA	0	3.92	0	tRNAPro-TGG,tRNAPro-AGG,tRNAPro-CGG
UUCAGGUCCCUGUCCAGGCGCCA	0	3.92	0	tRNALys-TTT
ACCGGGCGGAAACACCC	0	3.68	0	tRNA-derived_pseudogene,tRNAVal-AAC,tRNAVal-CAC
AGGGGUUAGGAUUCGGCG	0	3.68	0	tRNAGlu-CTC,tRNA-derived_pseudogene
AUCCCACCACUGCCACCA	0	3.68	0	tRNALeu-TAG
CCCAGCGGUGCCUCCA	0	3.68	0	tRNAThr-AGT
CUCAGUGGUAGAGCGCAU	0	3.68	0	tRNAAla-CGC,tRNAAla-TGC,tRNAAla-AGC
GCCCGCAUAGCUCAGUCGGUAGAGCAUCA	0	3.68	0	tRNALys-TTT
GCCCGGAUAGCUCAGUCGGUAGCGCAU	0	3.68	0	tRNALys-TTT
GCCCGGCUAGCUCAGACGGUAGAGCAUGGG	0	3.68	0	tRNALys-CTT
GCCCGGCUAGCUCAGCCGGUAGAGCAUGA	0	3.68	0	tRNALys-CTT
GCCCGGCUAGCUCAGUCUGUAGAGCAUGUG	0	3.68	0	tRNALys-CTT
GCCCGGCUAGCUCCGUCGGUAGAGCAUG	0	3.68	0	tRNALys-CTT
GCCUGGCUAGCUCAGUCGG	0	3.68	0	tRNALys-CTT
GGCUCUUUGGUCUAGGGGUAUGAUUCUCA	0	3.68	0	tRNAPro-TGG,tRNAPro-AGG,tRNAPro-CGG
GGGGAUGUAGCUCAGUGGUAGAGCCCAUG	0	3.68	0	tRNAAla-AGC,tRNAAla-TGC,tRNAAla-CGC
GGGGAUGUAGCUCAGUGGUAGAGCGCCUG	0	3.68	0	tRNAAla-TGC,tRNAAla-AGC,tRNAAla-CGC
GGGGGUAUAGCUCAGUGGUAGAGAGCGU	0	3.68	0	tRNA-derived_pseudogene,tRNAAla-AGC
GGGGGUAUAGCUCAGUGGUAGAGCACGU	0	3.68	0	tRNAAla-AGC
GGGGGUAUAGCUCAGUGGUAGAGCGCG	0	3.68	0	tRNAAla-AGC
GGGGGUGUAGCUCAGUGGUAGAGCACAUG	0	3.68	0	tRNAAla-TGC
GGGGGUGUAGCUCAGUGGUAGAGGGU	0	3.68	0	tRNAVal-AAC
UCAAGUCCCUGUUCAGGCACCA	0	3.68	0	tRNALys-TTT
UCCCGGCUAGCUCAGUCGGUAGAGCAUGGG	0	3.68	0	tRNALys-CTT
UCGGAACCGGGCAGAAGCACCA	0	3.68	0	tRNAVal-CAC
UCGGGUGUGAGAGGUCCC	0	3.68	0	tRNAPro-CGG
UCGGGUGUGAGAGGUCCCGGGUU	0	3.68	0	tRNAPro-CGG
UCGUGUCCCACCAGAGUCGCCA	0	3.68	0	tRNAArg-TCT
UGGACUCUGAAUCCAGCGAUCCGAGUUU	0	3.68	0	tRNAGln-CTG
UGGAUAAGGCACUGGC	0	3.68	0	tRNAArg-CCT
UGGUCUAAGGCGCCAGACUC	0	3.68	0	tRNALeu-CAA
UGGUGUAGUGGUAUCAUGCA	0	3.68	0	tRNAGly-CCC
AACCGAGCGGAAACACCA	0	3.43	0	tRNAVal-TAC
ACUCUUAAUCUCAGGGUCGUGGGU	0	3.43	0	tRNA-derived_pseudogene,tRNALys-CTT
AGGAUGGCCGAGUGGUCUAAGGCGCC	0	3.43	0	tRNALeu-CAA
AUUUCCCGGCCAAUGCACCA	0	3.43	0	tRNAGly-CCC
CGGAUAGCUCAGUCGGUAGAGCAUCAGA	0	3.43	0	tRNALys-TTT
CGGGAGACCGGGGUUCGA	0	3.43	0	tRNAAsp-GTC
CGGUUCGAAUCCGAGUCACGGCACCA	0	3.43	0	tRNAHis-GTG
GCCCGCCUAGCUCAGUCGGUAGAGCAUGA	0	3.43	0	tRNALys-CTT
GCCCGGCUAGCUCAGUCGGUAGAGCCUGAA	0	3.43	0	tRNALys-CTT
GCCCGGCUAGCUCAGUCGGUAGUGCAUGGG	0	3.43	0	tRNALys-CTT
GCCCGGCUAGCUUAGUCGGUAGAGCAUGA	0	3.43	0	tRNALys-CTT
GCGCCGCUGGUGUAGUGGUAUCAUGCAC	0	3.43	0	tRNAGly-CCC
GCGCCGCUGGUGUAGUUGUAUCAUGCAA	0	3.43	0	tRNAGly-CCC
GCGCCGCUGGUGUAUUGGUAUCAUGCAA	0	3.43	0	tRNAGly-CCC
GCUUCUGUAGUGUAGUGGA	0	3.43	0	tRNAVal-CAC
GGGGAUGUACCUCAGUGGUAGAGCGCAUG	0	3.43	0	tRNAAla-AGC,tRNAAla-TGC,tRNAAla-CGC
GGGGAUGUAGCUCAGUGGUAGAGCAC	0	3.43	0	tRNAAla-TGC,tRNAAla-CGC,tRNAAla-AGC
GGGGAUGUAGCUCAGUGGUAGAGCGU	0	3.43	0	tRNAVal-AAC,tRNAAla-CGC,tRNAAla-TGC,tRNAAla-AGC
GGGGGUAUAGCUCAGCGGUAGAGCGG	0	3.43	0	tRNAAla-AGC
GGGGGUAUAGCUCAGUGGGAGAGCAUU	0	3.43	0	tRNACys-GCA
GGGGGUGUAGCUCAGUGGGAGAGCGCGUG	0	3.43	0	tRNAAla-AGC,tRNAAla-CGC
GGGGGUGUAGCUCAGUGGUAGAGCGUC	0	3.43	0	tRNAVal-AAC
GGGUAUAGCUCAGGGGUAGAG	0	3.43	0	tRNACys-GCA
GGUCCCACCAGAGUCGCCA	0	3.43	0	tRNAArg-TCT
UCCUCGUUUGUAUAGUGGUGAGUAUCCCC	0	3.43	0	tRNAAsp-GTC
UCGAAACCGGGCGGAAACACC	0	3.43	0	tRNAVal-AAC,tRNAVal-CAC
UCGAAUUCCAUCCUCGUCGCCA	0	3.43	0	tRNASer-GCT
UCGCAACCGGGCGGAAACACCA	0	3.43	0	tRNAVal-CAC,tRNAVal-AAC
UCGGAUCCGGCUCGAAGGACCA	0	3.43	0	tRNATyr-GTA
UGGAUAAGGCGUCUGAC	0	3.43	0	tRNAArg-TCG
UGGAUAGCUCAGUCGGUAGAGCAUCA	0	3.43	0	tRNALys-TTT
UGGGUUCGAAUCCCAUCCUCGUCGC	0	3.43	0	tRNASer-GCT
UUCAUGUCCCUGUUCAGGCGCCA	0	3.43	0	tRNALys-TTT
UUUUAAUCUGAGGGUCCA	0	3.43	0	tRNALys-TTT,tRNA-derived_pseudogene
ACCGAGCGGAAACACCA	0	3.19	0	tRNAVal-TAC
AGGUGGUAGAGCAUUUGACUGCAGAU	0	3.19	0	tRNACys-GCA
AUAGCUCAGUCGGUAGAGCAC	0	3.19	0	tRNALys-TTT
CAGUGGUAGAGCGCGUGCU	0	3.19	0	tRNAAla-AGC,tRNAAla-CGC
CCCGGCUAGCUCAGUCGGUAGAGCAUGGG	0	3.19	0	tRNALys-CTT
CCGGAGCUGGGGAUUGU	0	3.19	0	tRNAArg-CCG
CGGAGCUGGGGAUUGU	0	3.19	0	tRNAArg-CCG
CGGGUGCGAGAGGUCCC	0	3.19	0	tRNAPro-CGG
CGGGUUCGAUCCCCGUACGGGCCACCA	0	3.19	0	tRNAIle-AAT
CUAAGCCAGGGAUUGUGGGA	0	3.19	0	tRNAArg-CCT
CUCACCUGGAGCACCA	0	3.19	0	tRNAIle-TAT
GAUCGUAACCAUCCUCUGCUACCA	0	3.19	0	tRNAMet-CAT
GCCCGAAUAGCUCAGUCGGUAGAGC	0	3.19	0	tRNALys-TTT
GCCCGACUAGCUCAGUCGGUAGAGCAUGAA	0	3.19	0	tRNALys-CTT
GCCCGGAUAGCUCAGUCGGUAGAGCAUG	0	3.19	0	tRNALys-CTT,tRNALys-TTT
GCCCGGCUACCUCAGUCGGUAGAGCAUG	0	3.19	0	tRNALys-CTT
GCCCGGCUAGCUCAGUAGGUAGAGCAUGA	0	3.19	0	tRNALys-CTT
GCGCCGCUGGUGUAGUGGUAUCAUGCAAA	0	3.19	0	tRNAGly-CCC
GCUCGGAUAGCUCAGUCGGUAGAGCAUC	0	3.19	0	tRNALys-TTT
GGGAGACCGGGGUUCGA	0	3.19	0	tRNAAsp-GTC
GGGGAUGUAGCUCAGCGGUAGAGCGCAU	0	3.19	0	tRNAAla-TGC,tRNAAla-AGC,tRNAAla-CGC
GGGGAUGUAGCUCAGUGGUAGAGCUCAUU	0	3.19	0	tRNAAla-CGC,tRNAAla-TGC,tRNAAla-AGC
GGGGGUAUAGCUCAGCGGUAGAGCGGG	0	3.19	0	tRNAAla-AGC
GGGGGUGUAACUCAGUGGUAGAGCGCGU	0	3.19	0	tRNAAla-AGC,tRNAAla-CGC
GGGGGUGUAGCUCAGUGGUAGAGAGU	0	3.19	0	tRNA-derived_pseudogene,tRNAVal-AAC
GGGGGUGUAGCUCAGUGGUAGAGCGCUUG	0	3.19	0	tRNAAla-TGC,tRNAAla-AGC,tRNAAla-CGC
GUGGCUAGGAUUCGGCGCUUU	0	3.19	0	tRNAGlu-TTC,tRNA-derived_pseudogene
GUUCGUUUCCCGGGCGGCGCACCA	0	3.19	0	tRNAGly-CCC
UAGCUCAGUCGGUAGAGCAUCAGACUUUU	0	3.19	0	tRNALys-TTT
UAGUUAGGAUUCGGCG	0	3.19	0	tRNAGlu-CTC,tRNA-derived_pseudogene
UCACAUCCCGGACGAGCCCCCA	0	3.19	0	tRNAPro-CGG,tRNAPro-AGG,tRNAPro-TGG
UCGAAUCCUGCCGACUACGCUA	0	3.19	0	tRNASer-AGA,tRNASer-TGA
UCGGGUGUGAGAGGUCCCGGGUA	0	3.19	0	tRNAPro-CGG
UCGUAUCCCACUCCUGACACCA	0	3.19	0	tRNALeu-CAG
UCGUAUCCCACUUCUGACACCA	0	3.19	0	tRNALeu-CAA,tRNALeu-CAG
UCUAGGGGUAUGAUUCUCGGU	0	3.19	0	tRNAPro-TGG
UGAUAACGCCAAGGUCGCGGGU	0	3.19	0	tRNAIle-AAT
UGCGACCCGGGUUCGUUUCCCGGGCGGCG	0	3.19	0	tRNAGly-CCC
UGGAUAAGGCAUUGGCG	0	3.19	0	tRNAArg-CCT
UGGUUAAGGCUUUGGACUUA	0	3.19	0	tRNALeu-TAA
UUCGGAUCCGAGUCACGGCACCA	0	3.19	0	tRNAHis-GTG
UUGACUGCAGAUCAAGAGGUCCCCGGU	0	3.19	0	tRNACys-GCA,tRNA-derived_pseudogene
UUGGGUGCGAGAGGUCCCGGGUU	0	3.19	0	tRNAPro-TGG
UUGGUUGCGAGAGGUCCC	0	3.19	0	tRNAPro-TGG
UUUGGUUGCGAGAGGUCCCGGGU	0	3.19	0	tRNAPro-TGG
AGGAUUCCUGGUUUUCAC	0	2.94	0	tRNAGlu-TTC
AGUGGUAUGAUUCUCGCU	0	2.94	0	tRNAPro-TGG
CAGUCGGUAGAGCAUCAGACUUU	0	2.94	0	tRNALys-TTT
CGGGUGCGAGAGGUCCCGGGU	0	2.94	0	tRNAPro-CGG
CGGUAUCGUAAACCGAAGAUCGCGGGU	0	2.94	0	tRNAThr-CGT
CUAAGUCAGGGAUUGUGGGU	0	2.94	0	tRNAArg-CCT
CUCAGUGGUAGAGCGCAUG	0	2.94	0	tRNAAla-TGC,tRNAAla-AGC,tRNAAla-CGC
GCCCGCAUAGCUCAGUCGGUAGAGCAUC	0	2.94	0	tRNALys-TTT
GCCCGGCGAGCUCAGUCGGUAGAGCAUGA	0	2.94	0	tRNALys-CTT
GCCCGGCUAACUCAGUCGGUAGAGCAUGGU	0	2.94	0	tRNALys-CTT
GCCCGGCUAGAUCAGUCGGUAGAGCAUGA	0	2.94	0	tRNALys-CTT
GCCCGGCUAGCUCAGUC	0	2.94	0	tRNALys-CTT
GCCCGGCUAGCUCAGUCGGUAGAACAUGGG	0	2.94	0	tRNALys-CTT
GCCCGGCUAGCUCAGUCGGUAGAGCAUUGA	0	2.94	0	tRNALys-CTT
GCCCGGCUAGCUCGGUCGGUAGAGCAUGGG	0	2.94	0	tRNALys-CTT
GCGCCGCUGGCGUAGUGGUAUCAUGCAA	0	2.94	0	tRNAGly-CCC
GCUUCUGUAGUUUAGUGGUUAUCACGUUC	0	2.94	0	tRNAVal-CAC
GGACUCUGAAUCCAGCGAUCCGAG	0	2.94	0	tRNAGln-CTG
GGCUCUGUUGCGCAAUGGAUAGCGCAUUU	0	2.94	0	tRNAArg-TCT
GGGGAUGUAGCUCAGUGGGAGAGCGCAUG	0	2.94	0	tRNAAla-TGC,tRNAAla-AGC,tRNAAla-CGC
GGGGGAUUAGCUCAAAUGGUAGAGCGCUCA	0	2.94	0	tRNAAla-AGC
GGGGGUGUAGCUCAGCGGUAGAGCGU	0	2.94	0	tRNAVal-AAC
GGGGGUGUAGCUCAGUGUUAGAGCGU	0	2.94	0	tRNAVal-AAC
GGGGUGUAGCUCAGUGGUAGAGC	0	2.94	0	tRNAAla-TGC,tRNAAla-AGC,tRNAAla-CGC,tRNAVal-AAC,tRNACys-GCA
GGGUGCGAGAGGUCCCGGGU	0	2.94	0	tRNAPro-AGG,tRNAPro-TGG,tRNAPro-CGG
GGUCUAGUGGUUAGGAUUCGGCGCUC	0	2.94	0	tRNA-derived_pseudogene,tRNAGlu-CTC
GUCCUGCCGCGGUCGCCA	0	2.94	0	tRNAArg-TCG
GUGCUGAUAACGCCAAGGUCGCGGGU	0	2.94	0	tRNAIle-AAT
GUGGCUAGGAUUCGGC	0	2.94	0	tRNAGlu-TTC,tRNA-derived_pseudogene
GUUCCCCGUACGGGCCACCA	0	2.94	0	tRNAIle-AAT
GUUGGUUAGAGCGUGGUG	0	2.94	0	tRNAIle-AAT
UAGUGGUUAGGAUUCGGCGCUCUCACCGCC	0	2.94	0	tRNAGlu-CTC
UCAGUUGGGAGAGCUUUA	0	2.94	0	tRNAPhe-GAA
UCAGUUGGUAGAGCAUCAG	0	2.94	0	tRNALys-TTT,tRNA-derived_pseudogene
UCGAAUCCUGCCGACUACG	0	2.94	0	tRNASer-AGA,tRNASer-TGA
UCGCAUCCCAUCCUCGUCGCCA	0	2.94	0	tRNASer-GCT
UCGGUUCGGAUCCGAGUCACGGCACCA	0	2.94	0	tRNAHis-GTG
UCUCCGGCAUCUCCACCA	0	2.94	0	tRNAAla-CGC,tRNAAla-TGC
UGGUCUAGGGGUAUGAU	0	2.94	0	tRNAPro-AGG,tRNAPro-CGG,tRNAPro-TGG,tRNA-derived_pseudogene
UGGUGGUCUAGUGGCUAG	0	2.94	0	tRNAGlu-TTC,tRNA-derived_pseudogene
UGGUUAAGGCGUUGGAC	0	2.94	0	tRNASer-CGA,tRNALeu-TAA,tRNASer-TGA
UUCGAUCCCCGGCAUCUCCACCA	0	2.94	0	tRNAAla-CGC,tRNAAla-TGC
UUGGGUGCGAGAGGUUCC	0	2.94	0	tRNAPro-TGG
UUUGGUGCGAGAGGUCCCGGGU	0	2.94	0	tRNAPro-TGG
AAUCCGAGUCACGGCACCA	0	2.7	0	tRNAHis-GTG
AGGUGUAUGAUUCUCGCU	0	2.7	0	tRNAPro-AGG,tRNAPro-TGG,tRNAPro-CGG
AGUUAGGAUUCGGCGCU	0	2.7	0	tRNA-derived_pseudogene,tRNAGlu-CTC
AUCGGUUAGCGCGUUCGG	0	2.7	0	tRNAAsn-GTT
AUUGGUUAGGAUUCGGCG	0	2.7	0	tRNA-derived_pseudogene,tRNAGlu-CTC
CAGGAUGGCCGAGCGGUCUAAGGCGCU	0	2.7	0	tRNALeu-CAG
CAGGAUGGCCGAGCGGUCUAAGGCGCUG	0	2.7	0	tRNALeu-CAG
CCAGGCGGCCCGGGUUCGA	0	2.7	0	tRNAGlu-TTC
CGAUUCCAGCUCGAAGGACCA	0	2.7	0	tRNATyr-GTA
CGGAAGCGUGCUGGGCCU	0	2.7	0	tRNAThr-CGT,tRNAMet-CAT
CGGCUGUUAACCGAAAGAUUGGUGGU	0	2.7	0	tRNAAsn-GTT
CGGUAGAGCGCGUGCUUAGCAUGCA	0	2.7	0	tRNAAla-AGC
CUCAUAAUCUGAAGGUCCUGAGU	0	2.7	0	tRNAMet-CAT
CUGAAUCCAGCGAUCCGAGUU	0	2.7	0	tRNAGln-CTG
CUGGCAUCCUAAGCCAGGGAUUGUGGGU	0	2.7	0	tRNAArg-CCT
GAAUCCAGCGAUCCGAGU	0	2.7	0	tRNAGln-CTG,tRNAGln-TTG
GCCCGGCUAGCUCAAUCGGUAGAGCAUGGG	0	2.7	0	tRNALys-CTT
GCCCGGCUAGCUCAGUCGGUACAGCAUGGG	0	2.7	0	tRNALys-CTT
GCCCGGCUAGCUCAGUCGGUAGAGUAUGA	0	2.7	0	tRNALys-CTT
GCCCGGCUAGCUCAGUCUGUAGAGCAUGA	0	2.7	0	tRNALys-CTT
GCCCGGCUAGCUCAGUUGGUAGAGCAUGG	0	2.7	0	tRNALys-CTT
GCGUUGGUGGUAUAGUGGUUAGCAUAGCUU	0	2.7	0	tRNAGly-TCC
GCUUCUGUAGUGUAGUGGUUAUCAUGUUC	0	2.7	0	tRNAVal-CAC
GGAUCAGAAGAUUGAGGGUU	0	2.7	0	tRNAArg-TCG,tRNAArg-CCG
GGGAGACCGGGGUUCGAUUCCCCGACGGG	0	2.7	0	tRNAAsp-GTC
GGGGAAUUAGCUCAAGCGGUAGAGAGCUU	0	2.7	0	tRNAAla-AGC
GGGGAUGUAGCUCAGUGGUAGAGUGCAU	0	2.7	0	tRNAAla-CGC,tRNAAla-TGC,tRNAAla-AGC
GGGGGUGUAGCUCAGUGGUAGAGCCCGU	0	2.7	0	tRNAAla-CGC,tRNAAla-AGC
GGGGGUGUAGCUCAGUGGUAGAGCUUU	0	2.7	0	tRNACys-GCA
GGGGUAUAGCUCAGUGGUAGAGCGUG	0	2.7	0	tRNAAla-AGC,tRNA-derived_pseudogene
GGGGUGCGAGAGGUCCC	0	2.7	0	tRNAPro-AGG,tRNAPro-CGG,tRNAPro-TGG
GUAGCUCAGUCGGUAGAGCAUCA	0	2.7	0	tRNALys-TTT
GUGGGUGUAGCUCAGUGGUAGAGCGU	0	2.7	0	tRNAVal-AAC
GUUGGUUAGAGCUUGGUGC	0	2.7	0	tRNAIle-AAT
GUUUCCAUAGUGUAGUGGUUAUCACGUUC	0	2.7	0	tRNAVal-AAC,tRNAVal-CAC
GUUUUCGUAGUGUAGUGGUUAUCACGUUC	0	2.7	0	tRNAVal-CAC,tRNAVal-AAC
UAAACCAGGGGUCGCGAG	0	2.7	0	tRNAThr-TGT
UCAGAUCCCGGACGAGCCCCC	0	2.7	0	tRNAPro-CGG,tRNAPro-AGG,tRNAPro-TGG
UCCCAGCGGGGCCUCCA	0	2.7	0	tRNAThr-AGT,tRNAThr-CGT
UCGGAUCAGAAGAUUGCAGGU	0	2.7	0	tRNAArg-TCG
UCGGAUCCCAGCGGUGCCUCCA	0	2.7	0	tRNAThr-AGT
UCGGGUCCCACCAGAGUCGCCA	0	2.7	0	tRNAArg-TCT
UCGGGUGCGAGAGGUCCCGGGG	0	2.7	0	tRNAPro-CGG
UCGUAUCCCACCGCUGCCACCA	0	2.7	0	tRNALeu-TAG,tRNALeu-AAG
UCGUGCCUCACCUGGAGCACCA	0	2.7	0	tRNAIle-TAT
UGGAUAAGGCAUUGGCGUCC	0	2.7	0	tRNAArg-CCT
UGGAUAGCGCAUUGGACU	0	2.7	0	tRNAArg-TCT,tRNA-derived_pseudogene
UGGGGUGCGAGAGGUCCC	0	2.7	0	tRNAPro-CGG,tRNAPro-TGG,tRNAPro-AGG
UGGGUGGUUCAGUGGUAGA	0	2.7	0	tRNAGly-GCC
UGGUGGUUCGAGCCCACCCAGGGACGCCA	0	2.7	0	tRNAAsn-GTT
UGGUGUAGUGGUAUCAUGCAAG	0	2.7	0	tRNAGly-CCC
UUCAUAUCACGUCGGGGUCACCA	0	2.7	0	tRNATrp-CCA
UUCGGGUGCGAGAGGUCCCGGGU	0	2.7	0	tRNAPro-CGG
UUCGUAACCGGGCGGAA	0	2.7	0	tRNAVal-CAC,tRNAVal-AAC
UUCGUUCCCCGUACGGGCCACCA	0	2.7	0	tRNAIle-AAT
UUGGGUGCGAGAGGUCCCGGG	0	2.7	0	tRNAPro-TGG
UUGGUGGUUCGUUCCCACCCAGGGACGCCA	0	2.7	0	tRNAAsn-GTT
AACCGUGCGGAAACACCA	0	2.45	0	tRNAVal-CAC,tRNAVal-AAC,tRNA-derived_pseudogene,tRNAVal-TAC
AAUCGGUUAGCGCGUUCGG	0	2.45	0	tRNAAsn-GTT
AGCAGAGGGGCGCAGCGGAAGCGUGCUG	0	2.45	0	tRNAMet-CAT
AGCAGAGUGGCGCAGCGGAAGCGUACUG	0	2.45	0	tRNAMet-CAT
AGCAGAGUGGCGCAGCGGCAGCGUGCUGG	0	2.45	0	tRNAMet-CAT
AGGAUGGCCGAGCGGUCUAAGGCGCU	0	2.45	0	tRNALeu-CAG
AGGGUAUGAUUCUCGCU	0	2.45	0	tRNAPro-CGG,tRNAPro-AGG,tRNAPro-TGG
AGUUGGUAGAGCAUCAGAA	0	2.45	0	tRNALys-TTT,tRNA-derived_pseudogene
AUCCCCGUACGGGCCACCA	0	2.45	0	tRNAIle-AAT
AUGGAUAAGGCAUUGGCAUC	0	2.45	0	tRNAArg-CCT
AUGGAUAAGGCGUCUGA	0	2.45	0	tRNAArg-TCG,tRNAArg-CCG
CAAUGGAUAACGCUUCUG	0	2.45	0	tRNA-derived_pseudogene,tRNAArg-ACG
CAGGGUUCAUGUCCCUGUUC	0	2.45	0	tRNA-derived_pseudogene
CAGUGGUAGAGCAUUUGACUG	0	2.45	0	tRNACys-GCA
CAGUUGGUAGAGCGGAGGAC	0	2.45	0	tRNATyr-GTA
CCGGAUAGCUCAGUCGGUAGAGCA	0	2.45	0	tRNALys-TTT
CCGGAUCAGAAGAUUGAGGGUU	0	2.45	0	tRNAArg-CCG
CCGGGUUCGUUUCCCGGUCAGGGAACCA	0	2.45	0	tRNA-derived_pseudogene,tRNAGlu-CTC,tRNAGlu-TTC
CGCCGCUGGUGUAGUGGUAUCAUGCAAG	0	2.45	0	tRNAGly-CCC
CGGAAGCGUGCUGGGA	0	2.45	0	tRNAMet-CAT,tRNAThr-CGT
CUGUUAACCGAAAGGUUGGUGGU	0	2.45	0	tRNAAsn-GTT
GCCCGGAUAGCUCAGUCGGUAGAGCAUCAU	0	2.45	0	tRNALys-TTT
GCGCCGCUGGUGUAGUGGUAUCAUACAA	0	2.45	0	tRNAGly-CCC
GCGUGCACGAGGUCCUGGGU	0	2.45	0	tRNAAla-AGC
GCUUUGCUUGUAUGAGGCCUCGGGU	0	2.45	0	tRNAAla-TGC
GGCAUGCACGAGGUCCUGGGU	0	2.45	0	tRNAAla-AGC
GGCUAGCUCAGUCGGUAGAGCAUGGGA	0	2.45	0	tRNALys-CTT
GGCUAGGAUUCGGCGCUUUCA	0	2.45	0	tRNA-derived_pseudogene,tRNAGlu-TTC
GGCUCCAUAGCUCAGGGGUUAGAGCACU	0	2.45	0	tRNAThr-TGT
GGCUCGUUGGUCUAGGGGUAUUAUUCU	0	2.45	0	tRNAPro-TGG,tRNAPro-AGG,tRNAPro-CGG
GGGGAUGUAGCUCAGGGGUAGAGCAU	0	2.45	0	tRNACys-GCA
GGGGGUAUAGCUCAGUGGUAGAGAGUG	0	2.45	0	tRNA-derived_pseudogene
GGGGGUAUAGCUCAGUGGUAGAGCAUUUUA	0	2.45	0	tRNACys-GCA
GGGGGUGUAGCUCAGUGGCAGAGCAUU	0	2.45	0	tRNACys-GCA
GGUCUAGUGGUUAGGAUUCGGCGC	0	2.45	0	tRNAGlu-CTC,tRNA-derived_pseudogene
GGUGUAGUGGUAUCAUGCAA	0	2.45	0	tRNAGly-CCC
GUAGUCGUGGCCGAGUGGUUAAGGCAAUG	0	2.45	0	tRNASer-AGA,tRNASer-TGA
GUGGUAGAGCGCGUGCU	0	2.45	0	tRNAAla-AGC,tRNAAla-CGC
GUUGGUAGAGCGGAGGAC	0	2.45	0	tRNATyr-GTA
GUUUCCCGGGCGGCGCACC	0	2.45	0	tRNAGly-CCC
UAGCUCAGUCGGUAGAGCAUGAG	0	2.45	0	tRNALys-CTT
UCGAAACCAUCCUCUGCUACCA	0	2.45	0	tRNAMet-CAT
UCGAAUCCUGUCGGCUACG	0	2.45	0	tRNASer-TGA
UCGCAUCCUGUUCGUGACGCCA	0	2.45	0	tRNASer-CGA
UCGGAUCCGAGUCACGGCACCA	0	2.45	0	tRNAHis-GTG
UCGGCUAGAGCUUGGUGCU	0	2.45	0	tRNAIle-AAT
UCGGGUGCGAGAGGUCCCGGGUA	0	2.45	0	tRNAPro-CGG
UCGGGUGCGAGAGGUUCCGGGU	0	2.45	0	tRNAPro-CGG
UCGGUUGCGAGAGGUCCC	0	2.45	0	tRNAPro-CGG
UCGGUUGUGAGAGGUCCCGGGU	0	2.45	0	tRNAPro-CGG
UCGUAUCCGGCUCGGAGGACCA	0	2.45	0	tRNATyr-GTA
UCUAGGGGUAUGAUUCUCGC	0	2.45	0	tRNAPro-CGG,tRNAPro-TGG,tRNAPro-AGG
UGCUUUGCACGCGUGGGU	0	2.45	0	tRNASer-GCT
UGGAUAAGGCGUCUGACUUCGGAU	0	2.45	0	tRNAArg-TCG
UGGUAGAAUUCUCGCCUCCAA	0	2.45	0	tRNAGly-CCC,tRNA-derived_pseudogene
UGGUAGAAUUCUCGCCUGC	0	2.45	0	tRNAGly-GCC
UGGUCUAAGGCGCCAGACUCA	0	2.45	0	tRNALeu-CAA
UGGUGUAAUGGUUAGCACUCUGGA	0	2.45	0	tRNAGln-TTG,tRNAGln-CTG
UUCGAAACUGGGCGGAAACACCA	0	2.45	0	tRNAVal-CAC
UUCGUAACUGGGCGGAAACACCA	0	2.45	0	tRNAVal-CAC
UUCUCGCUGGGGCCUCCA	0	2.45	0	tRNAThr-TGT
UUGCAGGUUCGGGUCCUGCCGCGGUCGCCA	0	2.45	0	tRNAArg-TCG
GACCGCGUGGCCUAAUGGAUAA	16.72	0.25	66.88	tRNAArg-TCG
UCAGUUGGUUAGAGCGU	12.21	0.25	48.84	tRNAIle-AAT,tRNA-derived_pseudogene
GGGGAUGGAGCUCAGUGGUAGAG	7.52	0.25	30.08	tRNAAla-AGC,tRNAAla-TGC,tRNAAla-CGC
GCUUCUGUAGUGUAGUGGUUAUCACUU	4.32	0.25	17.28	tRNAVal-CAC
GACCGCGUGGCCUAAUGGAU	4.13	0.25	16.52	tRNAArg-TCG
GCCCGGAUAGCGCAGUCGGUA	3.57	0.25	14.28	tRNALys-TTT
GGGCUAGUGGCGCAAUGGAUAA	3.57	0.25	14.28	tRNAArg-ACG,tRNA-derived_pseudogene
UGGAUAACGCGUCUGACUACGGA	3.57	0.25	14.28	tRNA-derived_pseudogene,tRNAArg-ACG
GACCGCGUUGCCUAAUGGAUA	2.82	0.25	11.28	tRNAArg-TCG
GGGGAUGUACCUCAGUGGUAGAG	10.33	0.98	10.5408	tRNAAla-AGC,tRNAAla-TGC,tRNAAla-CGC
ACUCCAGAUCAGAAGGCUGCGUGUUCG	2.44	0.25	9.76	tRNATrp-CCA
GCCCGGAUAGCUCAGGCGGUA	2.44	0.25	9.76	tRNALys-TTT
GGGGAUGUAGCUCAGUGGCAGAG	2.44	0.25	9.76	tRNAAla-CGC,tRNAAla-AGC,tRNAAla-TGC
UACUCUGCGUUGUGGCCGCAGCA	2.44	0.25	9.76	tRNAHis-GTG
GCCCGGAUAGCUCAGUCGGGA	20.67	2.21	9.35294	tRNALys-TTT
GCCCGGAGAGCUCAGUCGGUAG	4.51	0.49	9.20408	tRNALys-TTT
GCCCAGAUAGCUCAGUCGGUAG	2.25	0.25	9	tRNALys-TTT,tRNALys-CTT
GGGGAUGUAGCUCAGGGGUAGAG	2.07	0.25	8.28	tRNACys-GCA,tRNAAla-TGC,tRNAAla-CGC,tRNAAla-AGC
UCCCUGGUGGUCUAGUGGUUAGGA	13.53	1.72	7.86628	tRNAGlu-CTC
GCCCGUAUAGCUCAGUCGGUA	7.7	0.98	7.85714	tRNALys-TTT
GCACGGAUAGCUCAGUCGGUAG	3.76	0.49	7.67347	tRNALys-TTT
GCCCGGAUAGCUCAGUAGGUAG	5.64	0.74	7.62162	tRNALys-TTT
GGGGAUGUAGCUCAGUUGUAGAG	1.88	0.25	7.52	tRNAAla-CGC,tRNAAla-AGC,tRNAAla-TGC
CCCGGAUAGCUCAGUCGGUA	9.21	1.23	7.4878	tRNALys-TTT
GCUUGGAUAGCUCAGUCGGUAG	5.45	0.74	7.36486	tRNALys-TTT
GCCCGGAUAGCUUAGUCGGUA	3.38	0.49	6.89796	tRNALys-TTT
CCCGGAUAGCUCAGUCGGUAG	11.46	1.72	6.66279	tRNALys-TTT
GCUUCUGUAGUGUAGUGGUUAUCACGU	66.14	10.05	6.58109	tRNAVal-CAC
GCCCGGAUAGCGCAGUCGGUAG	3.19	0.49	6.5102	tRNALys-TTT
GCCCGGAUAGCUCAGUAGGUA	3.19	0.49	6.5102	tRNALys-TTT
GGGGAUGUAACUCAGUGGUAGAG	19.92	3.19	6.24451	tRNAAla-TGC,tRNAAla-CGC,tRNAAla-AGC
GCCCUGAUAGCUCAGUCGGUA	3.01	0.49	6.14286	tRNALys-TTT
GCGUUUGUGGUAUAGUGGUGAGCAUA	3.01	0.49	6.14286	tRNAGly-TCC
GCCCGGAUAUCUCAGUCGGUAG	2.82	0.49	5.7551	tRNALys-TTT
GCCGUGAUCGUAUAGUGGUUAG	8.08	1.47	5.4966	tRNA-derived_pseudogene,tRNAHis-GTG
GGCUCUGUGGCGCAAUGGAUAGCG	2.63	0.49	5.36735	tRNAArg-TCT
GGGGAUGUAACUCAGUGGUAG	2.63	0.49	5.36735	tRNAAla-CGC,tRNAAla-AGC,tRNAAla-TGC
GCUUCUGUAGUGUAGUGGUUA	15.22	2.94	5.17687	tRNAVal-CAC
GCUCGGAUAGCUCAGUCGGUA	12.59	2.45	5.13878	tRNALys-TTT
GCUCAGUUGGUUAGAGCGU	4.89	0.98	4.9898	tRNAIle-AAT,tRNA-derived_pseudogene
GACCGCGUUGCCUAAUGGAU	2.44	0.49	4.97959	tRNAArg-TCG
GCCCGGAUAGCGCAGUCGGU	2.44	0.49	4.97959	tRNALys-TTT
GGGGAUGUAGCUCAUUGGUAGAG	2.44	0.49	4.97959	tRNAAla-TGC,tRNAAla-CGC,tRNAAla-AGC
GCCCGAAUAGCUCAGUCGGUA	48.29	9.81	4.92253	tRNALys-TTT
CUAGUGGUUAGGAUUCGG	12.03	2.45	4.9102	tRNAGlu-CTC,tRNA-derived_pseudogene
GCCGUGAUCGUAUAGUGGUUA	7.14	1.47	4.85714	tRNAHis-GTG,tRNA-derived_pseudogene
GCCUGAAUAGCUCAGUCGGUA	3.57	0.74	4.82432	tRNALys-TTT
GCAUUGGUGGUUCAGUGGUAGAAUU	14.66	3.19	4.59561	tRNAGly-GCC,tRNAGly-CCC
GGGGAUGUACCUCAGUGGUAGA	2.25	0.49	4.59184	tRNAAla-AGC,tRNAAla-TGC,tRNAAla-CGC
GGGGAUGUAGCUCAGUGGGAGA	2.25	0.49	4.59184	tRNAAla-CGC,tRNAAla-TGC,tRNAAla-AGC
GUCCGGAUAGCUCAGUCGGUA	7.52	1.72	4.37209	tRNALys-TTT
UCCCUGGUGGUCUAGUGGUUAGGAUU	8.46	1.96	4.31633	tRNAGlu-CTC
GGGGAUGUAGCUCAGUGGUAGAG	1660.13	386.32	4.29729	tRNAAla-CGC,tRNAAla-TGC,tRNAAla-AGC
UCCCUGGUGGUCUAGUGGUUAGGAUUC	10.52	2.45	4.29388	tRNAGlu-CTC
GCUUGGAUAGCUCAGUCGGUA	8.27	1.96	4.21939	tRNALys-TTT
GGGCUAGUGGCGCAAUGGAUAACG	6.2	1.47	4.21769	tRNAArg-ACG,tRNA-derived_pseudogene
GCCUGGAUAGCUCAGUUGGUA	9.02	2.21	4.08145	tRNALys-TTT
CCCGGAUAGCUCAGUCGGUAGA	3.95	0.98	4.03061	tRNALys-TTT
GCCCGGAGAGCUCAGUCGGUA	3.95	0.98	4.03061	tRNALys-TTT
GCCCGCAUAGCUCAGUCGGUA	25.18	6.37	3.9529	tRNALys-TTT
GCCUGGAUAGCUCAGUUGGUAG	7.52	1.96	3.83673	tRNALys-TTT
GCCCGGAGAGCUCAGUCGGUAGA	1.88	0.49	3.83673	tRNALys-TTT
GGGGAAUUAGCUCAAGUGGUAGAG	1.88	0.49	3.83673	tRNAAla-AGC
UCCCUGGGGGUCUAGUGGUUAGGAUUCG	1.88	0.49	3.83673	tRNAGlu-CTC
GACCUCGUGGCGCAACGGUA	4.7	1.23	3.82114	tRNATrp-CCA
GCCCGGAUAGCUCAGUCGGCA	4.7	1.23	3.82114	tRNALys-TTT
GUCUAGUGGUUAGGAUUCGGC	2.82	0.74	3.81081	tRNAGlu-CTC,tRNA-derived_pseudogene
GCCCGGAUAACUCAGUCGGUA	27.25	7.35	3.70748	tRNALys-TTT
GCCCGGAUAGCUCAGUCGGUA	2074.46	584.38	3.54985	tRNALys-TTT
GCUUCUGUAGUGUAGUGGUUAUCACG	16.35	4.66	3.50858	tRNAVal-CAC
GGGCCAGUGGCGCAAUGGAUAACG	6.76	1.96	3.44898	tRNA-derived_pseudogene,tRNAArg-ACG
GGGGGUAUAGCUCAGUGGUAGAA	3.38	0.98	3.44898	tRNACys-GCA,tRNAAla-AGC,tRNA-derived_pseudogene
GCCCGGAUAGCUCAGUUGGUAG	2.44	0.74	3.2973	tRNALys-TTT,tRNA-derived_pseudogene
UCCCACAUGGUCUAGCGGUUAGGAUU	2.44	0.74	3.2973	tRNAGlu-TTC
GCGUUGGUGGUAUAGUGGUUAGCAU	3.19	0.98	3.2551	tRNAGly-TCC
GGUUCCAUAGUGUAGCGGUUA	3.19	0.98	3.2551	tRNAVal-TAC
GCCUGGAUAGCUCAGUCGGUA	200.68	62.02	3.23573	tRNALys-TTT
GCCUGGGUAGCUCAGUCGGUA	26.68	8.58	3.10956	tRNALys-TTT,tRNA-derived_pseudogene
GCGUUUGUGGUAUAGUGGUGAGCAUAG	3.01	0.98	3.07143	tRNAGly-TCC
GCGUUGGUGGUAUAGUGGUA	6.76	2.21	3.05882	tRNAGly-TCC
GCGUUGGUGGUAUAGUGGUGAGC	5.26	1.72	3.05814	tRNAGly-TCC
ACUCCAGAUCAGAAGGCUGCG	2.25	0.74	3.04054	tRNATrp-CCA
GCCCGGAUAGCUCAGUAGGU	2.25	0.74	3.04054	tRNALys-TTT
GGGGAUGUAGCUCAGUGGGAGAG	6.58	2.21	2.97738	tRNAAla-CGC,tRNAAla-AGC,tRNAAla-TGC
GCCCGGAUACCUCAGUCGGUA	5.64	1.96	2.87755	tRNALys-TTT
GCGUUGGUGGUAUAGUGGUG	21.98	7.84	2.80357	tRNAGly-TCC
UUGGUGGUAUAGUGGUGAGCAUAG	2.07	0.74	2.7973	tRNAGly-TCC
GCGUUGGUGGUAUAGUGGUAAGCAUAG	7.52	2.7	2.78519	tRNAGly-TCC
GCGUUGGUGGUAUAGUGGUUA	5.45	1.96	2.78061	tRNAGly-TCC
GCCCGGAUAGCUCAGUCGGGAG	27.81	10.05	2.76716	tRNALys-TTT
GCCCGGAUAGCUCAGCCGGUA	3.38	1.23	2.74797	tRNALys-TTT
GCCCGGAUAGCUCAGUCGGUAA	12.78	4.66	2.74249	tRNALys-TTT
CGGAUAGCUCAGUCGGUA	6.01	2.21	2.71946	tRNALys-TTT
GCCGUGAUCGUAUAGUGGUUAGUAC	2.63	0.98	2.68367	tRNAHis-GTG,tRNA-derived_pseudogene
GCCCGGAUAGCUCAGUCGGGAGA	8.46	3.19	2.65204	tRNALys-TTT
GCCUGGGUAGCUCAGUCGGUAG	8.27	3.19	2.59248	tRNALys-TTT,tRNA-derived_pseudogene
GCGUUGGUGGUAUAGUGGUGAGCAUAG	26.68	10.3	2.59029	tRNAGly-TCC
GCUUCUGUAGUGUAGUGGUU	10.15	3.92	2.58929	tRNAVal-CAC
GGAUAGCUCAGUCGGUA	10.15	3.92	2.58929	tRNALys-TTT
GCCGUGAUCGUAUAGUGGUUAGUA	5.07	1.96	2.58673	tRNAHis-GTG,tRNA-derived_pseudogene
GCCCGGAUAGCUUAGUCGGUAG	1.88	0.74	2.54054	tRNALys-TTT
GCCCGGAUAUCUCAGUCGGUA	1.88	0.74	2.54054	tRNALys-TTT
GCCUCGUUAGCGCAGUAGGUAGCG	1.88	0.74	2.54054	tRNAMet-CAT
GGGCCAGUGGCGCAAUGGAUAA	1.88	0.74	2.54054	tRNAArg-ACG,tRNA-derived_pseudogene
GCGUUGGUGGUAUAGUGGUAAGCAUA	4.89	1.96	2.4949	tRNAGly-TCC
GACCGGAUAGCUCAGUCGGUAG	2.44	0.98	2.4898	tRNALys-TTT
GACCUCGUGGCGCAAUGGUAG	2.44	0.98	2.4898	tRNATrp-CCA
GCCUGGAUAACUCAGUCGGUA	2.44	0.98	2.4898	tRNALys-TTT
GCAUGGGUGGUUCAGUGGUAGAAUU	25.55	10.3	2.48058	tRNAGly-GCC
GGGGAAUUAGCUCAAGCGGUA	6.01	2.45	2.45306	tRNAAla-AGC
GCCUGGAUAGCUCAGUUGGUAGA	3.01	1.23	2.44715	tRNALys-TTT
UCCCUGGUGGUCUAGUGGUUAGGAUUCG	204.44	84.32	2.42457	tRNAGlu-CTC
GGGGAUGUAGCUCAGUGGUAGA	423.54	175.26	2.41664	tRNAAla-CGC,tRNAAla-TGC,tRNAAla-AGC
GCAUGGGUGGUUCAGUGGUAGAAUUC	23.68	9.81	2.41386	tRNAGly-GCC
GCCCGGAUAGCUCAGUCGGG	7.7	3.19	2.41379	tRNALys-TTT
GCGUUGGUGGUAUAGUGGUGAGCAUAGC	14.09	5.88	2.39626	tRNAGly-TCC
GGGGAUGUAGCUCAGUGGUAGAGA	20.48	8.58	2.38695	tRNAAla-CGC,tRNAAla-TGC,tRNAAla-AGC
GCCCGAAUAGCUCAGUCGGUAG	62.01	26.23	2.36409	tRNALys-TTT
GGGGGAUUAGCUCAAAUGGUA	6.95	2.94	2.36395	tRNAAla-AGC
GCCCGCAUAGCUCAGUCGGUAG	31.94	13.73	2.32629	tRNALys-TTT
UCCCUGGUGGUCUAGUGGUUAG	13.53	5.88	2.30102	tRNAGlu-CTC
GUUUCCGUAGUGUAGUGGUUAUCACGU	4.51	1.96	2.30102	tRNAVal-AAC,tRNAVal-CAC
UCUAGUGGUUAGGAUUCGG	7.89	3.43	2.30029	tRNAGlu-CTC,tRNA-derived_pseudogene
GCACGGAUAGCUCAGUCGGUA	2.25	0.98	2.29592	tRNALys-TTT
UCCCUAGUGGUCUAGUGGUUAGGAUUCGG	2.25	0.98	2.29592	tRNAGlu-CTC
GCGUUGGUGGUAUAGUGGUGAGCA	12.59	5.64	2.23227	tRNAGly-TCC
UCCCUGGUGGUCUAGUGGUUAGGAU	12.03	5.39	2.23191	tRNAGlu-CTC
GGGAUGUAGCUCAGUGGUAGAG	4.32	1.96	2.20408	tRNAAla-CGC,tRNAAla-TGC,tRNAAla-AGC
GCCUGGAUAGCUCAGUCGGUAG	89.25	40.69	2.19341	tRNALys-TTT
UCCCACAUGGUCUAGCGGUUA	6.95	3.19	2.17868	tRNAGlu-TTC
UCCCUGGUGGUCUAGUGGUUA	19.73	9.07	2.1753	tRNAGlu-CTC
UCCGGCUCGGAGGACC	8.46	3.92	2.15816	tRNATyr-GTA
GCGUUGGUGGUAUAGUGGUGAGCAU	8.83	4.17	2.11751	tRNAGly-TCC
GCAUUUGUGGUUCAGUGGUAGAAUUC	2.07	0.98	2.11224	tRNAGly-CCC,tRNAGly-GCC
GGCCCCAUGGUGUAAUGGUUAGCAC	2.07	0.98	2.11224	tRNAGln-TTG
GGGGAUGUAGCUCAGUGGUAG	184.15	87.26	2.11036	tRNAAla-AGC,tRNAAla-CGC,tRNAAla-TGC
GCGUUGGUGGUAUAGUGGUUAGCAUAG	6.2	2.94	2.10884	tRNAGly-TCC
CAGUCGGUAGAGCAUG	13.72	6.62	2.07251	tRNALys-CTT
UCCGGCUCGAAGGACC	8.64	4.17	2.07194	tRNATyr-GTA
GCCGUGAUCGUAUAGUGGUUAGU	9.58	4.66	2.05579	tRNA-derived_pseudogene,tRNAHis-GTG
GCCCGGAUAGCUCAGUCGGUAG	2865.16	1395.99	2.05242	tRNALys-TTT
GCGUUGGUGGUAUAGUGGUGA	13.9	6.86	2.02624	tRNAGly-TCC
GGGGAUGUAACUCAGUGGUAGA	3.38	1.72	1.96512	tRNAAla-TGC,tRNAAla-CGC,tRNAAla-AGC
GGGGAUGUAGCUCAGUGGUAGAA	40.59	20.84	1.9477	tRNAAla-TGC,tRNAAla-CGC,tRNAAla-AGC
GCCCGGAGAGCUCAGUCGGU	1.88	0.98	1.91837	tRNALys-TTT
UCCCAUAUGGUCUAGCGGUUAG	1.88	0.98	1.91837	tRNAGlu-TTC
GCAUGGGUGGUUCAGUGGUAGAAUUCU	6.95	3.68	1.88859	tRNAGly-GCC
GCAUUGGUGGUUCAGUGGUAGAAUUC	43.78	23.53	1.8606	tRNAGly-GCC,tRNAGly-CCC
GCUCGGAUAGCUCAGUCGGU	5.45	2.94	1.85374	tRNALys-TTT
GCUUCUGUAGUGUAGUGGUUAUCA	18.6	10.05	1.85075	tRNAVal-CAC
CUCAGUUGGUUAGAGCGU	2.25	1.23	1.82927	tRNAIle-AAT,tRNA-derived_pseudogene
GACCGCGUGGCCUAAUGGA	2.25	1.23	1.82927	tRNAArg-TCG
GCCUGGAUAACUCAGUCGGU	2.25	1.23	1.82927	tRNALys-TTT
UCUAGUGGUUAGGAUUCG	2.25	1.23	1.82927	tRNAGlu-CTC,tRNA-derived_pseudogene
GCCCGAAUAGCUCAGUCGGUAGA	15.03	8.33	1.80432	tRNALys-TTT
GUCCGGAUAGCUCAGUCGGUAG	15.41	8.58	1.79604	tRNALys-TTT
GCGUUGGUGGUAUAGUGGUAA	3.95	2.21	1.78733	tRNAGly-TCC
GCCCGGAUAACUCAGUCGGUAG	40.21	22.55	1.78315	tRNALys-TTT
GCGUUGGUGGUAUAGUGGUGAGCAUA	14.28	8.09	1.76514	tRNAGly-TCC
GACGAGGUGGCCGAGUGGUUA	14.09	8.09	1.74166	tRNASer-GCT
GCCCGGAUAGCUCAGUCG	12.78	7.35	1.73878	tRNALys-TTT
GCCCGGAUAGCUCAGUCGGCAG	5.07	2.94	1.72449	tRNALys-TTT
UCCCAUAUGGUCUAGCGGUUAGGAUUC	3.38	1.96	1.72449	tRNAGlu-TTC
GCUCGGAUAGCUCAGUCGGUAG	12.03	7.11	1.69198	tRNALys-TTT
GCCCGGAUAGCUCAGCCGGUAG	4.13	2.45	1.68571	tRNALys-TTT
GCCCGGAUAGCUCAGUCGGUAAA	2.07	1.23	1.68293	tRNALys-TTT
GCGUUGGUGGUAUAGUGGUU	2.07	1.23	1.68293	tRNAGly-TCC
GCGUUGGUGGUAUAGUGGUUAG	2.07	1.23	1.68293	tRNAGly-TCC
GUCUCUGUGGCGCAAUCGGUUAG	2.07	1.23	1.68293	tRNAAsn-GTT
UCCCUGGUGGUCUAGUGGUU	4.51	2.7	1.67037	tRNAGlu-CTC
GCCUGGAUAGCUCAGUCGGUAGAA	2.44	1.47	1.65986	tRNALys-TTT
GGGGAUGUAGCUCAGUGGUAGAU	2.44	1.47	1.65986	tRNAAla-TGC,tRNAAla-CGC,tRNAAla-AGC
GGGGAAUUAGCUCAAAUGGUAGAG	5.26	3.19	1.6489	tRNAAla-AGC
UCUGGACUCUGAAUCUGGUAAU	6.39	3.92	1.6301	tRNAGln-CTG
GGAUAGCUCAGUCGGU	3.19	1.96	1.62755	tRNALys-TTT
GCCCGCAUAGCUCAGUCGG	3.76	2.45	1.53469	tRNALys-TTT
GCGUUGGUGGUAUAGUGGUAAGCAU	3.76	2.45	1.53469	tRNAGly-TCC
UCCCUGGUGGUCUAGUGGUUAGG	4.51	2.94	1.53401	tRNAGlu-CTC
UCCCACAUGGUCUAGCGGUUAGGAUUC	7.89	5.15	1.53204	tRNAGlu-TTC
GCCCUGAUAGCUCAGUCGGUAG	2.25	1.47	1.53061	tRNALys-TTT
UCCCUGGGGGUCUAGUGGUUAGGAUUCGG	2.25	1.47	1.53061	tRNAGlu-CTC
AACCGGGCGGAAACAC	4.13	2.7	1.52963	tRNAVal-AAC,tRNA-derived_pseudogene,tRNAVal-CAC
GCCCGUAUAGCUCAGUCGGUAGA	1.88	1.23	1.52846	tRNALys-TTT
GGGGAUGUAGCUCAGCGGUAGAG	1.88	1.23	1.52846	tRNAAla-CGC,tRNAAla-TGC,tRNAAla-AGC
GGCUCUGUGGCGCAAUGGAUAGCGCAU	4.32	2.94	1.46939	tRNAArg-TCT
GGAUAGCUCAGUCGGUAG	11.84	8.09	1.46354	tRNALys-TTT
GGGGGUAUAGCUCAGGUGGUAGAG	3.95	2.7	1.46296	tRNACys-GCA
GCUUCUGUAGUGUAGUGGUUAUCACGUU	65.58	44.86	1.46188	tRNAVal-CAC
GUUUCCGUAGUGUAGUGGUUA	18.98	12.99	1.46112	tRNAVal-CAC,tRNAVal-AAC
UCCCUGGUGGUCUAGUGGUUAGGAUUCU	11.09	7.6	1.45921	tRNAGlu-CTC,tRNA-derived_pseudogene
GCCCGGCUAGCUCAGUCGGUA	7.14	4.9	1.45714	tRNALys-CTT
CCCUGGUGGUCUAGUGGUUAGGAUUCGGC	9.96	6.86	1.4519	tRNAGlu-CTC,tRNA-derived_pseudogene
GGGGAAUUAGCUCAAAUGGUAG	2.82	1.96	1.43878	tRNAAla-AGC
GCAUUGGUGGUUCAGUGGUAGAAUUCU	10.9	7.6	1.43421	tRNAGly-GCC,tRNAGly-CCC
CGCAGGUUCGAAUCCUGCC	41.15	28.92	1.42289	tRNASer-AGA,tRNASer-TGA
CCUGGUGGUCUAGUGGUUAGGAUUCGGC	2.44	1.72	1.4186	tRNA-derived_pseudogene,tRNAGlu-CTC
GCGUUGGUGGUAUAGUGGUAAGCA	6.95	4.9	1.41837	tRNAGly-TCC
GCCCGGAUAGCUCAUUCGGUA	2.07	1.47	1.40816	tRNALys-TTT
GCGUUGGUGGUAUAGUGGUUAGCAUAGCU	2.07	1.47	1.40816	tRNAGly-TCC
GUCUCUCUGGCGCAAUCGG	2.07	1.47	1.40816	tRNAAsn-GTT,tRNAAsn-ATT
GCCCGGAUAACUCAGUCGGU	12.97	9.31	1.39313	tRNALys-TTT
GGGGGAUUAGCUCAAAUGGUAGAG	5.45	3.92	1.39031	tRNAAla-AGC
GCCCGAAUAGCUCAGUCGGU	22.74	16.42	1.3849	tRNALys-TTT
GGGGAAUUAGCUCAAGUGGUAGA	3.38	2.45	1.37959	tRNAAla-AGC
GCCCGUAUAGCUCAGUCGGUAG	5.07	3.68	1.37772	tRNALys-TTT
CCGGAUAGCUCAGUCGGUA	4.7	3.43	1.37026	tRNALys-TTT
GCCCGGAUAGCUCAGUCGGU	1036.29	766.02	1.35282	tRNALys-TTT
GCUUCUGUAGUGUAGUGGUUAUCACUUU	21.42	15.93	1.34463	tRNAVal-CAC
GGGGGAUUAGCUCAAAUGGUAG	5.26	3.92	1.34184	tRNAAla-AGC
GCCCGGAUAGCUCAGGCGGUAG	2.63	1.96	1.34184	tRNALys-TTT
GUCUAGUGGCUAGGAUUCGGCG	2.63	1.96	1.34184	tRNAGlu-TTC,tRNA-derived_pseudogene
GCCCGGAUAGCUCAGUCUGUAG	2.25	1.72	1.30814	tRNALys-TTT
GACUCUGAAUCCAGCGAUCCGA	5.45	4.17	1.30695	tRNAGln-CTG
GUCUCUGUGGCGCAAUCGG	10.71	8.33	1.28571	tRNAAsn-GTT,tRNAAsn-ATT
GACUCUGAAUCCAGCGAUCCG	1.88	1.47	1.27891	tRNAGln-CTG
GCGUUGGUGGUAUAGUGGUUAGCAUA	1.88	1.47	1.27891	tRNAGly-TCC
UUCAGGUCACGUCGGGGU	1.88	1.47	1.27891	tRNATrp-CCA
GGGGAUGUAACUCAGUGGUAGAGC	2.82	2.21	1.27602	tRNAAla-TGC,tRNAAla-CGC,tRNAAla-AGC
GGUUCCAUGGUGUAAUGGUUAGCAC	10.52	8.33	1.26291	tRNAGln-CTG
GCCCGUAUAGCUCAGUCGGU	5.26	4.17	1.26139	tRNALys-TTT
GCUCGGAUAGCUCAGUCGGUAGA	4.89	3.92	1.24745	tRNALys-TTT
GGUCCCAUGGUGUAAUGGUUAGCAC	3.01	2.45	1.22857	tRNAGln-TTG
GGGGGUAUAGCUCAGUGGUAGAGAA	6.01	4.9	1.22653	tRNA-derived_pseudogene,tRNACys-GCA
GCCCGGAUACCUCAGUCGGUAG	4.51	3.68	1.22554	tRNALys-TTT
GGGGGCAUAGCUCAGUGGUAGAG	6.2	5.15	1.20388	tRNACys-GCA
GGGGGUAUAGCUCAGUGGUAGAG	70.28	58.58	1.19973	tRNA-derived_pseudogene,tRNACys-GCA,tRNAAla-AGC
GGGGAUGUAGCUCAGUGGUA	87.75	73.29	1.1973	tRNAAla-CGC,tRNAAla-TGC,tRNAAla-AGC
GCAUUGGUGGUUCAGUGGUAGAAUUCA	5.26	4.41	1.19274	tRNAGly-GCC,tRNAGly-CCC
GGGGAAUUAGCUCAAAUGGUAGA	4.32	3.68	1.17391	tRNAAla-AGC
GUCAGGAUGGCCGAGCGGUCUAAGGCGCUG	3.95	3.43	1.1516	tRNALeu-CAG
UCCCAUAUGGUCUAGCGGUUA	3.95	3.43	1.1516	tRNAGlu-TTC
UCCCACAUGGUCUAGCGGUU	4.51	3.92	1.15051	tRNAGlu-TTC
AGUGGUAGAGCAUUUGACUG	3.38	2.94	1.14966	tRNACys-GCA
GCCUGGGUAGCUCAGUCGGUAGA	3.38	2.94	1.14966	tRNA-derived_pseudogene,tRNALys-TTT
GCCCGGAUAGCUCAUUCGGUAG	2.25	1.96	1.14796	tRNALys-TTT
GGGGAUGUAGCUCAGUGGUAA	2.25	1.96	1.14796	tRNAAla-AGC,tRNAAla-TGC,tRNAAla-CGC
GCCCGGAUAACUCAGUCGGUAGA	9.96	8.82	1.12925	tRNALys-TTT
UCCGAGUCACGGCACCA	23.86	21.82	1.09349	tRNAHis-GTG
GGGGAAUUAGCUCAAGCGGUAGA	1.88	1.72	1.09302	tRNAAla-AGC
GCGUUGGUGGUAUAGUGGUGAG	12.59	11.52	1.09288	tRNAGly-TCC
ACCAGGAUGGCCGAGUGGUUA	7.7	7.11	1.08298	tRNALeu-TAA
GUCAGGAUGGCCGAGUGGUCUAA	2.63	2.45	1.07347	tRNALeu-CAA
UUCAGGUCACGUCGGGGUC	2.63	2.45	1.07347	tRNATrp-CCA
GCCCGCAUAGCUCAGUCGGU	9.96	9.31	1.06982	tRNALys-TTT
UCUGGACUCUGAAUCUGGUAA	7.52	7.11	1.05767	tRNAGln-CTG
UCCCUGGUGGUCUAGUGGUUAUGAUUCGG	2.07	1.96	1.05612	tRNAGlu-CTC
AGGGGUAGAGCAUUUGACUGC	2.82	2.7	1.04444	tRNACys-GCA
GGGGGUGUAGCUCAGUGGUAGAGAA	2.82	2.7	1.04444	tRNACys-GCA,tRNAAla-TGC
GCCCGGAUAGCUCAGUCGGUAGAA	42.65	41.43	1.02945	tRNALys-TTT
GGUUCCAUGGUGUAAUG	3.01	2.94	1.02381	tRNAGln-CTG,tRNA-derived_pseudogene
AGAAGAUCGCGGGUUCG	2.25	2.21	1.0181	tRNAThr-CGT
GGGCCAGUUGCGCAAUGGAUAACG	2.25	2.21	1.0181	tRNAArg-ACG,tRNA-derived_pseudogene
AGUGGUAGAGCAUUUGACUGC	11.65	11.52	1.01128	tRNACys-GCA
GGGCCAGUGGCGCAAUGGAUAACGC	2.44	2.45	0.995918	tRNAArg-ACG,tRNA-derived_pseudogene
GGGGAUGUAGCUCAGUGGA	2.44	2.45	0.995918	tRNAAla-CGC,tRNAAla-AGC,tRNAAla-TGC
GGCUCGUUGGUCUAGGGGUAUG	13.9	13.97	0.994989	tRNAPro-CGG,tRNAPro-TGG,tRNAPro-AGG
CCCGGAUAGCUCAGUCGGU	4.13	4.17	0.990408	tRNALys-TTT
GUUUCCGUAGUGUAGUGGUU	17.85	18.14	0.984013	tRNAVal-CAC,tRNAVal-AAC
GCGUUGGUGGUAUAGUGGUUAGCA	4.32	4.41	0.979592	tRNAGly-TCC
CGCUGGUUCGUUUCCGGCUCGAAGGACCA	2.63	2.7	0.974074	tRNATyr-GTA
GCGGGAGACCGGGGUUCGAUUCCCCGAC	2.63	2.7	0.974074	tRNAAsp-GTC
UCAGUCGGUAGAGCAUGAGA	7.33	7.6	0.964474	tRNALys-CTT
GGGGGUAUAGCUCAGUGGUAGA	8.46	8.82	0.959184	tRNAAla-AGC,tRNA-derived_pseudogene,tRNACys-GCA
GCCUGGAUAGCUCAGUUGG	2.82	2.94	0.959184	tRNALys-TTT
GCCGUGAUCGUAUAGUGG	1.88	1.96	0.959184	tRNAHis-GTG,tRNA-derived_pseudogene
GCUUGGAUAGCUCAGUCGGUAGA	1.88	1.96	0.959184	tRNALys-TTT
GUCAGGAUGGCCGAGCGGUA	1.88	1.96	0.959184	tRNALeu-CAG
AGUCGGUAGAGCAUGAGACU	27.43	28.68	0.956416	tRNALys-CTT
GCGUUGGUGGUAUAGUGGUAAGCAUAGCU	3.01	3.19	0.943574	tRNAGly-TCC
GGGGAAUUAGCUCAAGCGGU	3.01	3.19	0.943574	tRNAAla-AGC
GUCCGGAUAGCUCAGUCGGU	2.07	2.21	0.936652	tRNALys-TTT
UCCUCGUUAGUAUAGUGGUGAGUAUCCCCG	2.07	2.21	0.936652	tRNAAsp-GTC
GCCCGGAUAGCUCAGUCGGUAGA	643.01	691.74	0.929554	tRNALys-TTT
GGGGAAUUAGCUCAAGCGGUAG	3.38	3.68	0.918478	tRNAAla-AGC
GACGAGGUGGCCGAGUGGUUAAGG	2.25	2.45	0.918367	tRNASer-GCT
GUCAGGAUGGCCGAGUGGUC	3.76	4.17	0.901679	tRNALeu-CAA
AGCGGAAGCGUGCUGGGCCC	6.39	7.11	0.898734	tRNAMet-CAT,tRNAThr-CGT
AGAAGAUUGAGGGUUCG	3.95	4.41	0.895692	tRNAArg-CCG,tRNAArg-TCG
GGUUCCAUGGUGUAAUGGUUAGCACU	11.09	12.5	0.8872	tRNAGln-CTG
GCGUUGGUGGUAUAGUGGUAAGC	2.82	3.19	0.884013	tRNAGly-TCC
GUCCGGAUAGCUCAGUCGGUAGA	4.32	4.9	0.881633	tRNALys-TTT
GCCCGCAUAGCUCAGUCGGUAGA	7.52	8.58	0.876457	tRNALys-TTT
GCCUGGAUAGCUCAGUCGGUAGA	23.3	26.72	0.872006	tRNALys-TTT
CAGUCGGUAGAGCAUGAGA	16.35	18.87	0.866455	tRNALys-CTT
GUCUCUGUGGCGCAAUCGGUUA	3.38	3.92	0.862245	tRNAAsn-GTT
GUCUCUGUGGCGCAAUCGGU	46.41	53.93	0.86056	tRNAAsn-GTT,tRNAAsn-ATT
AGUGGUAGAGCAUUUGACUGCA	3.57	4.17	0.856115	tRNACys-GCA
AACCGGGCGGAAACACC	141.87	167.42	0.84739	tRNAVal-AAC,tRNAVal-CAC,tRNA-derived_pseudogene
GGGGAUGUAGCUCAGUGG	12.03	14.22	0.845992	tRNAAla-TGC,tRNAAla-CGC,tRNAAla-AGC
GGUUCCAUGGUGUAAUGGUUAGCACUCUG	6.2	7.35	0.843537	tRNAGln-CTG
GCCCGGAUACCUCAGUCGGU	2.25	2.7	0.833333	tRNALys-TTT
GCAUGGGUGGUUCAGUGGUAGAAUUCA	2.44	2.94	0.829932	tRNAGly-GCC
GGGGGUAUAGCUCAGUGGGUAGA	2.63	3.19	0.824451	tRNACys-GCA
GGGGGUAUAGCUCAGUGGUAG	2.63	3.19	0.824451	tRNACys-GCA,tRNAAla-AGC,tRNA-derived_pseudogene
CUAGCGGUUAGGAUUCCUGG	3.01	3.68	0.817935	tRNAGlu-TTC,tRNA-derived_pseudogene
UCCCUGGUGGUCUAGUGGUUAGGAUUCGU	16.16	19.86	0.813696	tRNAGlu-CTC
CCGGAUAGCUCAGUCGGUAGA	3.38	4.17	0.810552	tRNALys-TTT
GCCUGGAUAGCUCAGUUGGUAGAG	6.95	8.58	0.810023	tRNALys-TTT
GCCCGGAUAGCUCAGUCGGUAU	3.57	4.41	0.809524	tRNALys-TTT
GGGGGAUUAGCUCAAAUGGUAGA	4.32	5.39	0.801484	tRNAAla-AGC
GCCCGAAUAGCUCAGUCGG	5.83	7.35	0.793197	tRNALys-TTT
GCCCGGAUAGCUCAGUCGG	267.01	339.5	0.78648	tRNALys-TTT
ACCAGAAUGGCCGAGUGGUUA	3.01	3.92	0.767857	tRNALeu-TAA
GGUUCCAUUGUGUAAUGGUUAGCA	1.88	2.45	0.767347	tRNAGln-CTG
GCAUUGGUGGUUCAGUGGUAGAA	3.95	5.15	0.76699	tRNAGly-GCC,tRNAGly-CCC
GGAUAGCUCAGUCGGUAGA	3.95	5.15	0.76699	tRNALys-TTT
GCGUUGGUGGUAUAGUGGUAAG	2.07	2.7	0.766667	tRNAGly-TCC
GGUUCCAUGGUGUAAUGGUUAG	5.45	7.11	0.766526	tRNAGln-CTG
UCGUGGGUUCGGGCCCCACGUUGGGCGCCA	3.38	4.41	0.76644	tRNALys-CTT
GCGCCGCUGGUGUAGUGGUAUCA	2.82	3.68	0.766304	tRNAGly-CCC
UCGGUAGAGCAUGAGA	2.82	3.68	0.766304	tRNALys-CTT
GGUUCCAUAGUGUAGCGGUU	3.57	4.66	0.766094	tRNAVal-TAC
CUCAGUCGGUAGAGCAUGAGA	4.32	5.64	0.765957	tRNALys-CTT
GGUUCCAUGGUGUAAUGGUUA	2.25	2.94	0.765306	tRNAGln-CTG
GGGGGUAUAGCUCAGUGGGUAGAG	15.22	20.1	0.757214	tRNACys-GCA
GCUUCUGUAGUGUAGUGGUUAU	20.48	27.21	0.752664	tRNAVal-CAC
GCGCCGCUGGUGUAGUGGUA	9.58	12.75	0.751373	tRNAGly-CCC
GGCUCGUUGGUCUAGGGGUAUGA	4.89	6.62	0.738671	tRNAPro-CGG,tRNAPro-TGG,tRNAPro-AGG
GUCUCUGUUGCGCAAUCGGU	8.46	11.52	0.734375	tRNAAsn-ATT,tRNAAsn-GTT
UCCCUGGUGGUCUAGUGGUUAGGAUUCGG	277.35	377.74	0.734235	tRNAGlu-CTC
UCCCUGGUGGUCUAGUGGU	3.95	5.39	0.732839	tRNAGlu-CTC
GCCUGGAUAGCUCAGUCGGUAGAGCA	4.13	5.64	0.73227	tRNALys-TTT
GUGGUCUAGUGGUUAGGAUUCGGC	7.52	10.3	0.730097	tRNA-derived_pseudogene,tRNAGlu-CTC
CCCUGGUGGUCUAGUGGUUAGGAUUCGGCG	3.76	5.15	0.730097	tRNAGlu-CTC,tRNA-derived_pseudogene
GUAGUCGUGGCCGAGUGGUUA	16.54	22.8	0.725439	tRNASer-TGA,tRNASer-AGA
GGGGGUGUAGCUCAGUGGUAGAG	58.25	80.4	0.724502	tRNACys-GCA,tRNAAla-TGC,tRNAAla-AGC,tRNAAla-CGC,tRNAVal-AAC
UCCCUGGUGGUCUAGUGGUUAGGAUUCUG	12.59	17.65	0.713314	tRNAGlu-CTC,tRNA-derived_pseudogene
UCCCACAUGGUCUAGCGGUUAG	2.44	3.43	0.71137	tRNAGlu-TTC
GCUUCUGUAGUGUAGUGGU	4.32	6.13	0.704731	tRNAVal-CAC
GGGGGUAUAGCUCAGUGGUAGAGA	2.07	2.94	0.704082	tRNA-derived_pseudogene
GUUUCCGUAGUGUAGUGGUUAUCA	23.11	32.85	0.703501	tRNAVal-CAC,tRNAVal-AAC
GUCUCUCUGGCGCAAUCGGU	4.13	5.88	0.702381	tRNAAsn-GTT,tRNAAsn-ATT
CUAGUGGUUAGGAUUCGGC	3.95	5.64	0.700355	tRNAGlu-CTC,tRNA-derived_pseudogene
GCCUGGAUAGCUCAGUCGGAA	1.69	2.45	0.689796	tRNALys-TTT
GCGUUGGUGGUAUAGUGGUUAGC	1.69	2.45	0.689796	tRNAGly-TCC
GCUUGGAUAGCUCAGUCGGU	1.69	2.45	0.689796	tRNALys-TTT
GGGGGUGUAGCUCAGUGGUAGAA	1.69	2.45	0.689796	tRNAAla-TGC,tRNAAla-AGC,tRNAVal-AAC,tRNAAla-CGC,tRNACys-GCA
UCCCAUAUGGUCUAGCGGUUAGGAUUCC	3.01	4.41	0.68254	tRNAGlu-TTC
GCCUGGAUAGCUCAGUCGGU	152.01	225.52	0.674042	tRNALys-TTT
AGUCGGUAGAGCAUGAGACUC	40.78	60.55	0.673493	tRNALys-CTT
GCCUGAAUAGCUCAGUCGGU	3.76	5.64	0.666667	tRNALys-TTT
GUCAGGAUGGCCGAGUGGUCUAAGGC	15.97	24.51	0.651571	tRNALeu-CAA
GACGAGGUGGCCGAGUGGUU	11.84	18.38	0.644178	tRNASer-GCT
CUCAGUCGGUAGAGCAUG	7.33	11.52	0.636285	tRNALys-CTT
GGUUCCAUGGUGUAAUGGUUAGCA	15.22	24.27	0.627112	tRNAGln-CTG
CCACGCGGGAGGCCCGGGUUCGUUUCCCGG	1.69	2.7	0.625926	tRNAGly-GCC
GCAUUGGUGGUUCAGUGGUAGAAU	1.69	2.7	0.625926	tRNAGly-CCC,tRNAGly-GCC
GCCCGGAGAGCUCAGUCGGUAGAG	1.69	2.7	0.625926	tRNALys-TTT
GCUUCUGUAGUGUAGUGGUUAUCAC	4.7	7.6	0.618421	tRNAVal-CAC
ACCAGGAUGGCCGAGUGGU	1.5	2.45	0.612245	tRNALeu-TAA
UCCCUGGUGGUCUAGUGGUUAGGAUUUGGC	2.07	3.43	0.603499	tRNAGlu-CTC
GUCAGGAUGGCCGAGCGGUCUAAGGC	14.47	24.51	0.590371	tRNALeu-CAG
ACCAGAAUGGCCGAGUGGUU	1.88	3.19	0.589342	tRNALeu-TAA
CUAAGCCAGGGAUUGUGGGUUCA	1.88	3.19	0.589342	tRNAArg-CCT
GCCCGGAUAGCUCAGUCGGAA	16.54	28.43	0.58178	tRNALys-TTT
GGGGGUAUAGCUCAGCGGUAGAG	4.13	7.11	0.580872	tRNAAla-AGC
UCUAGUGGUUAGGAUUCGGCG	34.39	59.81	0.574987	tRNAGlu-CTC,tRNA-derived_pseudogene
GGUCCCAUGGUGUAAUGGUUAGCACUCUG	2.25	3.92	0.57398	tRNAGln-TTG
GCCCGGAUAACUCAGUCGG	2.63	4.66	0.564378	tRNALys-TTT
GUUUCCGUAGUGUAGUGGUUAUCACUUU	2.07	3.68	0.5625	tRNAVal-CAC,tRNAVal-AAC
GGCUCGUUGGUCUAGGGGUAUGAUU	14.47	25.98	0.556967	tRNAPro-AGG,tRNAPro-CGG,tRNAPro-TGG
GCCUGGAUAGCUCAGUCGG	32.32	58.09	0.556378	tRNALys-TTT
GCGUUGGUGGUAUAGUGG	4.89	8.82	0.554422	tRNAGly-TCC
CUAAGCCAGGGAUUGUGGGUUC	2.44	4.41	0.553288	tRNAArg-CCT
GGGGAUGUAGCUCAGUGGAA	1.88	3.43	0.548105	tRNAAla-CGC,tRNAAla-AGC,tRNAAla-TGC
GCGUUGGUGGUAUAGUGGU	18.41	34.07	0.540358	tRNAGly-TCC
ACUCCAGAUCAGAAGGCUGCGUG	5.83	10.79	0.540315	tRNATrp-CCA
GCUUCUGUAGUGUAGUG	1.32	2.45	0.538776	tRNAVal-CAC
GUCAGCAUGGCCGAGCGG	1.32	2.45	0.538776	tRNALeu-CAG
GUCAGGAUGGCCGAGCGGUC	10.15	18.87	0.537891	tRNALeu-CAG
GACGAGGUGGCCGAGUGGU	3.01	5.64	0.533688	tRNASer-GCT
GUAGUCGUGGCCGAGUGGUUAA	16.35	30.64	0.533616	tRNASer-AGA,tRNASer-TGA
GUCGGUAGAGCAUGAGA	4.7	8.82	0.53288	tRNALys-CTT
GUUUCCGUAGUGUAGUGGUUAUCACGUU	6.01	11.28	0.532801	tRNAVal-CAC,tRNAVal-AAC
GUCAGGAUGGCCGAGUGG	6.2	11.77	0.526763	tRNALeu-CAA
GCAUUGGUGGUUCAGUGGUA	19.92	37.99	0.524349	tRNAGly-GCC,tRNAGly-CCC
UCAGUCGGUAGAGCACA	3.57	6.86	0.520408	tRNA-derived_pseudogene,tRNALys-CTT
GCUUCUGUAGUGUAGUGGUUAUC	14.66	28.19	0.520043	tRNAVal-CAC
GCGUUGGUGGUAUAGUGGUGAGCAUAGCU	10.52	20.59	0.510928	tRNAGly-TCC
AGUGGUAGAGCAUUUGACU	2.25	4.41	0.510204	tRNACys-GCA
GGGAUGUAGCUCAGUGGUAGA	1.5	2.94	0.510204	tRNAAla-CGC,tRNAAla-TGC,tRNAAla-AGC
GUCAGGAUGGCCGAGUGGUCUA	1.5	2.94	0.510204	tRNALeu-CAA
GCCGUGAUCGUAUAGUGGUU	2.44	4.9	0.497959	tRNAHis-GTG,tRNA-derived_pseudogene
UUCAGGUCACGUCGGGGUCA	1.69	3.43	0.492711	tRNATrp-CCA
CCGGAUAGCUCAGUCGGUAG	9.96	20.35	0.489435	tRNALys-TTT
GCCAGGAUAGCUCAGUCGGUAGAG	1.32	2.7	0.488889	tRNALys-TTT
GGUCCCAUGGUGUAAUGGUUAGCACUCUGA	1.32	2.7	0.488889	tRNAGln-TTG
GGUUCCAUAGUGUAGUGGUUAUCACGUCU	1.32	2.7	0.488889	tRNAVal-TAC
UCCGGAUGGAGGCGUGGGUU	2.25	4.66	0.482833	tRNALeu-CAA
GCCUGGGUAGCUCAGUCGG	6.39	13.24	0.482628	tRNALys-TTT,tRNA-derived_pseudogene
UCGUGGGUUCGUGCCCCACGUUGGGCGCCA	2.82	5.88	0.479592	tRNALys-CTT
GGGGGAUUAGCUCAAAUGG	3.95	8.33	0.47419	tRNAAla-AGC
UCCGGCUCGAAGGACCA	40.59	85.79	0.473132	tRNATyr-GTA
GCAUUGGUGGUUCAGUGGU	10.9	23.04	0.47309	tRNAGly-GCC,tRNAGly-CCC
GCGCCGCUGGUGUAGUGGUAU	3.57	7.6	0.469737	tRNAGly-CCC
UCCCAUAUGGUCUAGCGGUUAGGAUUCCU	2.07	4.41	0.469388	tRNAGlu-TTC
GGUUCCAUGGUGUAAUGGUUAGC	4.13	8.82	0.468254	tRNAGln-CTG
GGGGGAUUAGCUCAAAUGGU	5.83	12.5	0.4664	tRNAAla-AGC
UCCGGCUCGGAGGACCA	29.13	62.51	0.466005	tRNATyr-GTA
GCAUUGGUGGUUCAGUGGUAG	3.19	6.86	0.465015	tRNAGly-GCC,tRNAGly-CCC
GUCAGGAUGGCCGAGC	3.19	6.86	0.465015	tRNALeu-CAG
UAGUGGUUAGGAUUCGG	6.58	14.22	0.462729	tRNAGlu-CTC,tRNA-derived_pseudogene
GAAGAUCGCGGGUUCGA	14.84	32.11	0.462161	tRNAThr-CGT
UCAGUCGGUAGAGCAUGAGACU	1.13	2.45	0.461224	tRNALys-CTT
GCAUGGGUGGUUCAGUGGUAGAAU	12.59	27.45	0.458652	tRNAGly-GCC
UCCGGAUGGAGGCGUGGGU	3.57	7.84	0.455357	tRNALeu-CAA
GUUUCCGUAGUGUAGCGGUU	3.01	6.62	0.454683	tRNAVal-CAC
GGGGGUGUAGCUCAGUGGUAGA	19.92	43.88	0.453965	tRNAAla-AGC,tRNAAla-CGC,tRNAAla-TGC,tRNAVal-AAC,tRNACys-GCA
GGGGGUAUAGCUCAGGGGUAGAG	2.44	5.39	0.45269	tRNACys-GCA
UCCCACAUGGUCUAGCGGUUAGGAUUCC	4.32	9.56	0.451883	tRNAGlu-TTC
GCCUGGGUAGCUCAGUCGGU	18.79	41.67	0.450924	tRNALys-TTT,tRNA-derived_pseudogene
GGUCUAGUGGUUAGGAUUCGGC	1.88	4.17	0.450839	tRNAGlu-CTC,tRNA-derived_pseudogene
GCCCGGAUAGCGCAGUCGGUAGAG	1.32	2.94	0.44898	tRNALys-TTT
GGUAGCGUGGCCGAGCGGUCUA	1.32	2.94	0.44898	tRNALeu-TAG,tRNALeu-AAG
UCCCAUAUGGUCUAGCGGU	1.32	2.94	0.44898	tRNAGlu-TTC
GCCGUGAUCGUAUAGUGGU	2.63	5.88	0.447279	tRNAHis-GTG,tRNA-derived_pseudogene
GCAUGGGUGGUUCAGUGGUAGA	6.76	15.2	0.444737	tRNAGly-GCC
GUCAGGAUGGCCGAGUGGUCU	3.01	6.86	0.438776	tRNALeu-CAA
ACCAGGAUGGCCGAGUGGUU	5.26	12.01	0.437968	tRNALeu-TAA
AGUCGGUAGAGCAUCAGACU	1.5	3.43	0.437318	tRNALys-TTT
GCGCCGCUGGUGUAGUGGU	2.25	5.15	0.436893	tRNAGly-CCC
GGGGAUGUAGCUCAGUGGU	17.29	39.96	0.432683	tRNAAla-TGC,tRNAAla-CGC,tRNAAla-AGC
GGUCCCAUGGUGUAAUGGUUAGCA	3.38	7.84	0.431122	tRNAGln-TTG
GGGGGUAUAGCUCAGCGGUAGA	1.69	3.92	0.431122	tRNAAla-AGC
GGGGGUAUAGCUCAGCGGUAGAGCGCG	1.69	3.92	0.431122	tRNAAla-AGC
UCCCUGGUGGUCUAGUGGUUAGGAUUCGGA	8.08	18.87	0.428193	tRNAGlu-CTC
GCCUGGAUAACUCAGUCGGUAGAG	1.88	4.41	0.426304	tRNALys-TTT
AGCGGAAGCGUGCUGGGCC	2.07	4.9	0.422449	tRNAMet-CAT,tRNAThr-CGT
CGGAUAGCUCAGUCGGUAGA	2.07	4.9	0.422449	tRNALys-TTT
GGGGAAUUAGCUCAAGCGG	2.07	4.9	0.422449	tRNAAla-AGC
GCCUGGAUAGCUCAGUUGGU	4.32	10.3	0.419417	tRNALys-TTT
GGCCGGUUAGCUCAGUCGGCUAGAGCUUGG	1.13	2.7	0.418519	tRNAIle-AAT
GGGAUGUAGCUCAGUGGUAG	1.13	2.7	0.418519	tRNAAla-TGC,tRNAAla-CGC,tRNAAla-AGC
GGGGUGUAGCUCAGUGGUAG	1.13	2.7	0.418519	tRNAAla-AGC,tRNAAla-CGC,tRNAAla-TGC,tRNAVal-AAC,tRNACys-GCA
GGGGGUAUAGCUCAGCGGUAG	2.25	5.39	0.41744	tRNAAla-AGC
GGUUCCAUGGUGUAAUGGUUAGCACUCUGA	6.01	14.46	0.415629	tRNAGln-CTG
GUCUAGUGGUUAGGAUUCGGCG	13.9	33.58	0.413937	tRNA-derived_pseudogene,tRNAGlu-CTC
CGGGAGACCGGGGUUCGAUUCCCCGACGGG	1.32	3.19	0.413793	tRNAAsp-GTC
GGCUCCGUGGCGCAAUGGAUAGCGCAUU	1.32	3.19	0.413793	tRNAArg-TCT
GUAGUCGUGGCCGAGUGGUUAAGGC	1.32	3.19	0.413793	tRNASer-AGA,tRNASer-TGA
UCUAGUGGUUAGGAUUCGGC	1.32	3.19	0.413793	tRNA-derived_pseudogene,tRNAGlu-CTC
CCCUGGUGGUCUAGUGGUUAGGAUUCGG	4.32	10.54	0.409867	tRNA-derived_pseudogene,tRNAGlu-CTC
AGGUCCCUGUUCGGGCGCC	1.5	3.68	0.407609	tRNALys-TTT
CUGGACUCUGAAUCCAGCGAUCCGAG	1.5	3.68	0.407609	tRNAGln-CTG
AGUCGGUAGAGCAUGAGA	15.97	39.71	0.402166	tRNALys-CTT
GGGGGUAUAGCUCAGUGGGUAGAGCA	2.07	5.15	0.401942	tRNACys-GCA
GUCAGGAUGGCCGAGUGGUCUAAGG	8.27	20.84	0.396833	tRNALeu-CAA
GCCCGGAUAGCUCAGUCGGUAGU	6.58	16.67	0.394721	tRNALys-TTT
GGUGGUCUAGUGGUUAGGAUUCGGCG	19.54	50.74	0.385101	tRNAGlu-CTC
GUCUCUGUAGCGCAAUCGGU	1.32	3.43	0.38484	tRNAAsn-GTT,tRNAAsn-ATT
AGAAGAUCGCGGGUUCGA	1.13	2.94	0.384354	tRNAThr-CGT
CCCUGGUCUAGUGGUUAGGAUU	1.13	2.94	0.384354	tRNA-derived_pseudogene
GCCCGGAUAUCUCAGUCGGUAGAG	0.94	2.45	0.383673	tRNALys-TTT
GGUAGCGUGGCCGAGCGGUC	0.94	2.45	0.383673	tRNALeu-AAG,tRNALeu-TAG
GGUGGUCUAGUGGUUAGGAUUCGGC	3.57	9.31	0.383459	tRNAGlu-CTC,tRNA-derived_pseudogene
GUCAGGAUGGCCGAGCGGUCUAAG	2.63	6.86	0.383382	tRNALeu-CAG
GGUUCCAUAGUGUAGCGGU	3.57	9.56	0.373431	tRNAVal-TAC
GCCUGGAUAGCUCAGUCGGUAGAGC	3.38	9.07	0.372657	tRNALys-TTT
ACCGGGAUGGCUGAGUGGUUA	2.63	7.11	0.369902	tRNALeu-TAA
GCUCAGUCGGUAGAGCAUGAGA	2.07	5.64	0.367021	tRNALys-CTT
GGGGGAUUAGCUCAAAUG	1.88	5.15	0.365049	tRNAAla-AGC
CGGAUAGCUCAGUCGGUAG	7.14	19.61	0.3641	tRNALys-TTT
GUCAGGAUGGCCGAGUGGU	29.69	81.63	0.363714	tRNALeu-CAA
GUCAGGAUGACCGAGCGGU	3.38	9.31	0.36305	tRNALeu-CAG
UGGUGGUCUAGUGGUUAGGAUUCGGC	1.69	4.66	0.362661	tRNA-derived_pseudogene,tRNAGlu-CTC
CGUGGGUUCGGGCCCCACGUUGGGCGCCA	4.32	12.01	0.3597	tRNALys-CTT
CCCGGCUAGCUCAGUCGGUAGAGCAUGA	1.32	3.68	0.358696	tRNALys-CTT
UCCAGCUCGAAGGACCA	1.32	3.68	0.358696	tRNATyr-GTA
CCGGAUAGCUCAGUCGGUAGAG	2.63	7.35	0.357823	tRNALys-TTT
GCCCGGAUAGCUCAGUCGUUAGAG	1.13	3.19	0.354232	tRNALys-TTT
GCCUGCAUAGCUCAGUCGGUAGAG	1.13	3.19	0.354232	tRNALys-TTT
GUCGGUAGAGCAUGAGACU	7.7	21.82	0.352887	tRNALys-CTT
GGCUCGUUGGUCUAGGGGUAUGAUUCUCG	5.26	14.95	0.351839	tRNAPro-CGG,tRNAPro-TGG,tRNAPro-AGG
UCCCACAUGGUCUAGCGGU	4.13	11.77	0.350892	tRNAGlu-TTC
GGGGGUAUAGCUCAGCGGUA	1.88	5.39	0.348794	tRNAAla-AGC
GUCUCUGUGGCGCAAUCGGUUAGCG	1.88	5.39	0.348794	tRNAAsn-GTT
CGGAAGCGUGCUGGGCCCAU	2.82	8.09	0.348578	tRNAMet-CAT
GCCCGGAUAGCUCAGUCGGUAUAG	2.82	8.09	0.348578	tRNALys-TTT
AAUGGAUAACGCGUCUGACUACGGAU	0.94	2.7	0.348148	tRNAArg-ACG,tRNA-derived_pseudogene
CCUCCGGAGCUGGGGAUUGUGGGU	0.94	2.7	0.348148	tRNAArg-CCG
CUGGUGGUCUAGUGGUUAGGAUUCGGC	0.94	2.7	0.348148	tRNAGlu-CTC,tRNA-derived_pseudogene
GGCUCUGUAGCGCAAUGGAUAGCGCAUU	0.94	2.7	0.348148	tRNAArg-TCT
GGGGGUAUAGCUCAGUGGUA	0.94	2.7	0.348148	tRNA-derived_pseudogene,tRNACys-GCA,tRNAAla-AGC
UCCUCGUUAGUAUAGUGGUGAGUAUCCC	0.94	2.7	0.348148	tRNAAsp-GTC
UGUGGUCUAGUGGUUAGGAUUCGGCG	2.63	7.6	0.346053	tRNAGlu-CTC
CUAGUGGUUAGGAUUCGGCG	66.89	193.65	0.345417	tRNAGlu-CTC,tRNA-derived_pseudogene
ACCGGGCGGAAACACC	10.33	29.91	0.345369	tRNAVal-CAC,tRNAVal-AAC,tRNA-derived_pseudogene
GGGGGUGUAGCUCAGUGGUAG	11.84	34.32	0.344988	tRNAAla-TGC,tRNAVal-AAC,tRNACys-GCA,tRNAAla-AGC,tRNAAla-CGC
CUCAGUCGGUAGAGCAUGGGA	1.69	4.9	0.344898	tRNALys-CTT
GCGUUUGUGGUAUAGUGGU	1.69	4.9	0.344898	tRNAGly-TCC
GUCUCUGUGGCGCAAUCGGUU	1.69	4.9	0.344898	tRNAAsn-GTT
AGUCGGUAGAGCAUGGG	6.58	19.12	0.344142	tRNALys-CTT
GCAGGUUCGAAUCCUGCC	2.44	7.11	0.343179	tRNASer-AGA,tRNASer-TGA
GCCCGGAUAGCUCAGUCGGA	16.91	49.52	0.341478	tRNALys-TTT
GGGGAUGUAGCUCAGUGGUAGAGU	3.01	8.82	0.34127	tRNAAla-TGC,tRNAAla-CGC,tRNAAla-AGC
GCAUUGGUGGUUCAGUGG	4.51	13.24	0.340634	tRNAGly-GCC,tRNAGly-CCC
GGCUCGUUGGUCUAGGGGUAUGAU	4.51	13.24	0.340634	tRNAPro-AGG,tRNAPro-CGG,tRNAPro-TGG
GUUUCCGUAGUGUAGUGGUCAUCA	1.5	4.41	0.340136	tRNAVal-AAC
GUGGUCUAGUGGUUAGGAUUCGGCG	37.58	111.04	0.338437	tRNAGlu-CTC
UCAGUCGGUAGAGCAUG	3.01	9.07	0.331863	tRNALys-CTT
AGUCGGUAGAGCAUGAGACA	1.13	3.43	0.329446	tRNALys-CTT
GACCUCGUGGCGCAACGGU	1.13	3.43	0.329446	tRNATrp-CCA
GCAUUUGUGGUUCAGUGGUA	1.13	3.43	0.329446	tRNAGly-GCC,tRNAGly-CCC
GUAGUCGUGGCCGAGUGGUUAAG	8.27	25.49	0.324441	tRNASer-TGA,tRNASer-AGA
GCCCGGAUAGCUCAGUCGGGAGAG	4.89	15.2	0.321711	tRNALys-TTT
CAGUCGGUAGAGCAUGA	1.88	5.88	0.319728	tRNALys-CTT
CCGGCUCGAAGGACCA	1.88	5.88	0.319728	tRNATyr-GTA
GGGGGUAUAGCUCAGGG	0.94	2.94	0.319728	tRNACys-GCA,tRNA-derived_pseudogene,tRNATyr-GTA
GUAGUCGUGGCCGAGUGGUUAAGG	6.39	20.1	0.31791	tRNASer-TGA,tRNASer-AGA
UCCCUGGUGGUCUAGUGGUUAGGAUUCGGC	94.52	297.34	0.317885	tRNAGlu-CTC
GGGGGCAUAGCUCAGUGG	4.51	14.22	0.317159	tRNACys-GCA
GUCAGAAUGGCCGAGCGG	1.32	4.17	0.316547	tRNALeu-CAG
GCGUUGGUGGUAUAGUG	2.07	6.62	0.312689	tRNAGly-TCC
GUAGUCGUGGCCGAGUGGU	2.07	6.62	0.312689	tRNASer-AGA,tRNASer-TGA
UCCCUGGUCUAGUGGUUAGGAUU	63.32	204.19	0.310103	tRNA-derived_pseudogene
AAAUCACGUCGGGGUCACCA	1.13	3.68	0.307065	tRNATrp-CCA
CGGGUUCGUUUCCCGGCCAACGCACCA	1.13	3.68	0.307065	tRNAGly-TCC
AGUCGGUAGAGCAUGAGACUCA	6.01	19.61	0.306476	tRNALys-CTT
GGCUCGUUGGUCUAGGGGU	2.25	7.35	0.306122	tRNAPro-CGG,tRNAPro-TGG,tRNAPro-AGG
GGGGAUGUAGCUCAGUGGUAGAGCC	2.25	7.35	0.306122	tRNAAla-TGC,tRNAAla-CGC,tRNAAla-AGC
ACCAGGAUGGCCGAGUGGUUAAGGC	0.75	2.45	0.306122	tRNALeu-TAA
ACUUCGGAUCAGAAGAUUGAGGGU	0.75	2.45	0.306122	tRNAArg-TCG
AGCAGAGUUGCGCAGCGGAAGCGUGCU	0.75	2.45	0.306122	tRNAMet-CAT
CAUGUCACGUCGGGGUCACCA	0.75	2.45	0.306122	tRNATrp-CCA
GCCCGACUAGCUCAGUCGGUAGAGCAUGAG	0.75	2.45	0.306122	tRNALys-CTT
GCCCUGAUAGCUCAGUCGGU	0.75	2.45	0.306122	tRNALys-TTT
GGGGGUAUAGCUCAGCGG	0.75	2.45	0.306122	tRNAAla-AGC
UCCCUGGUGGUCUAGUGGUUAGGAUUCUU	0.75	2.45	0.306122	tRNAGlu-CTC,tRNA-derived_pseudogene
GCGGAAGCGUGCUGGGCCC	3.57	11.77	0.303314	tRNAMet-CAT,tRNAThr-CGT
GUUUCCGUAGUGUAGUGGU	5.26	17.4	0.302299	tRNAVal-CAC,tRNAVal-AAC
GCUGGUUCGUUUCCGGCUCGAAGGACCA	4.13	13.73	0.300801	tRNATyr-GTA
GCCUGAAUAGCUCAGUCGGUAGAG	1.69	5.64	0.299645	tRNALys-TTT
GGCUCGUUCGUCUAGGGGUAUGAUUCUCG	1.32	4.41	0.29932	tRNAPro-AGG,tRNAPro-TGG,tRNAPro-CGG
AGGAUGGCCGAGCGGU	2.25	7.6	0.296053	tRNALeu-CAG
GCCCGGCUAGCUCAGUCGGU	3.19	10.79	0.295644	tRNALys-CTT
CAAAUCACGUCGGGGUCACCA	0.94	3.19	0.294671	tRNATrp-CCA
GCCCGGAUAACUCAGUCGGUAGAGCA	0.94	3.19	0.294671	tRNALys-TTT
GGGGGUAUAGCUCAGCGGU	0.94	3.19	0.294671	tRNAAla-AGC
GGGGGUAUAGCUCAGGGGUAGAGCA	4.51	15.44	0.292098	tRNACys-GCA
GCGGGAGACCGGGGUUCGAUUCCCCGACG	2.07	7.11	0.291139	tRNAAsp-GTC
GGCUCUGUGGCGCAAUGGAUAGCGCAUU	4.89	16.91	0.289178	tRNAArg-TCT
CCACGUGGGAGACUCGGGU	1.13	3.92	0.288265	tRNAGly-CCC
CCGUGAUCGUAUAGUGGUUAG	1.13	3.92	0.288265	tRNA-derived_pseudogene,tRNAHis-GTG
GUUCGAAACCGGGCGGAAACACCA	1.13	3.92	0.288265	tRNAVal-AAC,tRNAVal-CAC
GUUUCCGUAGUGUAGUGGUUAUC	18.23	63.49	0.287132	tRNAVal-AAC,tRNAVal-CAC
GGGGAUGUAGCUCAGUGGUAGAGCG	4.13	14.46	0.285615	tRNAAla-CGC,tRNAAla-TGC,tRNAAla-AGC
UGGUGGUCUAGUGGUUAGGAUUCGGCG	4.89	17.16	0.284965	tRNAGlu-CTC
GGCUCGUUGGUCUAGGGGUAU	8.83	31.13	0.283649	tRNAPro-TGG,tRNAPro-AGG,tRNAPro-CGG
CCCGGAUAGCUCAGUCGGUAGAG	1.32	4.66	0.283262	tRNALys-TTT
GGGGGUAUAGCUCAGGGGUAGAGCACUUG	1.32	4.66	0.283262	tRNACys-GCA
GGGGGUGUAGCUCAGUGGU	2.07	7.35	0.281633	tRNAAla-CGC,tRNAAla-TGC,tRNAVal-AAC,tRNACys-GCA,tRNAAla-AGC
GGAUGGCCGAGCGGUCUAAGGC	0.75	2.7	0.277778	tRNALeu-CAG
GGCCCCAUGGUGUAAUGGU	0.75	2.7	0.277778	tRNAGln-CTG,tRNAGln-TTG
GUCAGGAUGACCGAGCGGUCUAAGG	0.75	2.7	0.277778	tRNALeu-CAG
UCCCUGGUGGUCUAGUGGUUAGGAUUCGGG	0.75	2.7	0.277778	tRNAGlu-CTC
UGUGGUCUAGUGGUUAGGAUUCGGC	0.75	2.7	0.277778	tRNAGlu-CTC,tRNA-derived_pseudogene
AGCAGAGUGGCGCAGCGGAAGCGUGCUGGG	4.13	14.95	0.276254	tRNAMet-CAT
GGGGGUAUAGCUCAGUGGUAGAGCA	3.38	12.26	0.275693	tRNACys-GCA
GGCUCGUUGGUCUAGGGGUA	6.01	21.82	0.275435	tRNAPro-TGG,tRNAPro-AGG,tRNAPro-CGG
GCGCCGCUGGUGUAGUGGUAUC	1.88	6.86	0.274052	tRNAGly-CCC
ACGCGGGAGACCGGGGUUCGAUUCCCCGA	0.94	3.43	0.274052	tRNAAsp-GTC
AGUGGUAGAGCAUUUGACUGCAGA	0.94	3.43	0.274052	tRNACys-GCA
CGUGGGUUCGAAUCCCAUCCUCGUCGCCA	0.94	3.43	0.274052	tRNASer-GCT
GCGUUUGUGGUAUAGUGGUGAGCAUAGCU	0.94	3.43	0.274052	tRNAGly-TCC
GUCAGGAUGGCCGAGCGGU	106.17	389.5	0.27258	tRNALeu-CAG
CUCAGUCGGUAGAGCAUCA	3.19	11.77	0.271028	tRNALys-TTT
AGUGGUAGAGCAUUUGA	1.13	4.17	0.270983	tRNACys-GCA
GCCUGGAUAGCUCAGUCGGUAGAGAA	1.13	4.17	0.270983	tRNALys-TTT
GUCAGGAUGGCCGAGCGG	52.99	196.1	0.270219	tRNALeu-CAG
CGGCUAGCUCAGUCGGUAGAGCAUGA	1.32	4.9	0.269388	tRNALys-CTT
UGGUCUAGUGGUUAGGAUUCGGCG	14.66	54.42	0.269386	tRNAGlu-CTC
GUAGUCGUGGCCGAGUGGUU	7.33	27.21	0.269386	tRNASer-TGA,tRNASer-AGA
GCUCGGAUAGCUCAGUCGGUAGAG	12.78	47.55	0.26877	tRNALys-TTT
GGGGGUAUAGCUCAGUGG	6.76	25.49	0.265202	tRNACys-GCA,tRNAAla-AGC,tRNA-derived_pseudogene
CCCACGUUGGGCGCCA	3.76	14.22	0.264416	tRNALys-CTT,tRNA-derived_pseudogene
UCCCUGGUGGUCUAGUGGUUAGGAUUCGUC	3.76	14.22	0.264416	tRNAGlu-CTC
GUCAGAAUGGCCGAGCGGU	1.88	7.11	0.264416	tRNALeu-CAG
GUCAGGAUGGCCGAGCG	9.02	35.05	0.257347	tRNALeu-CAG
GCAUGGGUGGUUCAGUGGUAGAA	11.46	44.61	0.256893	tRNAGly-GCC
GGCUAGCUCAGUCGGUAGAGCAUG	1.32	5.15	0.256311	tRNALys-CTT
CUCAGUCGGUAGAGCAUGAGAC	1.13	4.41	0.256236	tRNALys-CTT
UCCAAUGGAGGCGUGGGUU	1.13	4.41	0.256236	tRNALeu-CAA
CGUGGGUUCGAGCCCCACGUUGGGCGCCA	2.07	8.09	0.255871	tRNALys-CTT
UCCCUGGUGGUCUAGUG	9.4	36.77	0.255643	tRNAGlu-CTC,tRNAGlu-TTC,tRNA-derived_pseudogene
AAACCGGGCGGAAACACC	0.94	3.68	0.255435	tRNAVal-CAC,tRNAVal-AAC,tRNA-derived_pseudogene
GCCCGGAUAGCUCAGUUGGUAGAGCAU	0.94	3.68	0.255435	tRNALys-TTT,tRNA-derived_pseudogene
GGAAGCGUGCUGGGCCC	0.94	3.68	0.255435	tRNAMet-CAT,tRNAThr-CGT
GGUAGUGUGGCCGAGCGG	0.94	3.68	0.255435	tRNALeu-TAG
UGGUUAGGAUUCGGCGCUCUC	0.94	3.68	0.255435	tRNA-derived_pseudogene,tRNAGlu-CTC
GGUAGCGUGGCCGAGCGGU	5.07	19.86	0.255287	tRNALeu-AAG,tRNALeu-TAG
GGCUAGCUCAGUCGGUAGAGCAUGA	1.69	6.62	0.255287	tRNALys-CTT
CGGAUGGAGGCGUGGG	1.5	5.88	0.255102	tRNALeu-CAA
GCCCGCAUAGCUCAGUCGGUAGAGCA	0.75	2.94	0.255102	tRNALys-TTT
UCCCUGGUGGUCUAGUGGUUAGGAUUCUGC	5.07	20.1	0.252239	tRNAGlu-CTC
GUCAGGAUGGCCGAGCGGUCUAA	3.01	12.01	0.250624	tRNALeu-CAG
CAGUCGGUAGAGCAUGAGAC	12.97	51.97	0.249567	tRNALys-CTT
UGGUCUAGUGGUUAGGAUUCGGC	2.25	9.07	0.248071	tRNA-derived_pseudogene,tRNAGlu-CTC
GUCAGGAUGACCGAGCGG	1.5	6.13	0.244698	tRNALeu-CAG
GGGGGUGUAGCUCAGUGGUAGAGCG	13.72	56.13	0.244433	tRNAVal-AAC,tRNAAla-TGC,tRNAAla-AGC,tRNAAla-CGC
GCCCGGAUAACUCAGUCGGUAGAG	13.15	53.93	0.243835	tRNALys-TTT
GUCGGUAGAGCAUGAGACUC	3.38	13.97	0.241947	tRNALys-CTT
GUGGUUAGGAUUCGGCG	50.92	212.03	0.240155	tRNA-derived_pseudogene,tRNAGlu-CTC
ACGCGGGAGACCGGGGUUCGAUUCCCCGAC	0.94	3.92	0.239796	tRNAAsp-GTC
CCCCACGUUGGGCGCCA	2.82	11.77	0.239592	tRNA-derived_pseudogene,tRNALys-CTT
GCCUGGGUAGCUCAGUCGGUAGAG	20.67	86.28	0.239569	tRNA-derived_pseudogene,tRNALys-TTT
GCCUGGAUAGCUCAGUCGGUAGAG	75.91	318.42	0.238396	tRNALys-TTT
AGAUCACGUCGGGGUCACCA	0.75	3.19	0.23511	tRNATrp-CCA
AGCAUGAGACUCUUAAUCU	0.75	3.19	0.23511	tRNALys-CTT,tRNA-derived_pseudogene
GCGGAAGCGUGCUGGGCC	0.75	3.19	0.23511	tRNAMet-CAT,tRNAThr-CGT
GGCCCCAUGGUGUAAUGGUUAGCACUCUGA	0.75	3.19	0.23511	tRNAGln-TTG
GUCAGGAUGGCCGAGCGU	0.75	3.19	0.23511	tRNALeu-CAG
GUUUCCGUAGUGUAGCGGUUAUC	0.75	3.19	0.23511	tRNAVal-CAC
GGGGGUGUAGCUCAGUGGUAGAGCAUUUG	4.32	18.38	0.235038	tRNACys-GCA
GCGUUGGUGGUAUAGU	1.32	5.64	0.234043	tRNAGly-TCC
GCGGGAGACCGGGGUUCGAUUCCCCGACGG	4.51	19.36	0.232955	tRNAAsp-GTC
CCCAUCCUCGUCGCCA	1.88	8.09	0.232386	tRNASer-GCT
GAAGAUCGCGGGUUCGAU	1.88	8.09	0.232386	tRNAThr-CGT
GCCCGCAUAGCUCAGUCGGUAGAG	12.97	56.13	0.231071	tRNALys-TTT
AUCCGAGUCACGGCACCA	1.13	4.9	0.230612	tRNAHis-GTG
CCAGAUCAGAAGGCUGCGUGU	1.13	4.9	0.230612	tRNATrp-CCA
GCAUGGGUGGUUCAGUGGUAG	4.51	19.61	0.229985	tRNAGly-GCC
ACCCCACUCUCGGUACCA	0.56	2.45	0.228571	tRNALeu-TAA
CCGCUGGUGUAGUGGUAUCAUGCAA	0.56	2.45	0.228571	tRNAGly-CCC
CUCAGUCGGUAGAGCAUCAGA	0.56	2.45	0.228571	tRNALys-TTT
GCAUGGGUGGUUCAGUGGUAGAAA	0.56	2.45	0.228571	tRNAGly-GCC
GUUCGUUUCCCGGCCAAUGCACCA	0.56	2.45	0.228571	tRNAGly-GCC
GUUCGUUUCCGGCUCGAAGGACCA	0.56	2.45	0.228571	tRNATyr-GTA
GGGGGUAUAGCUCAGUGGGUAGAGCAU	2.63	11.52	0.228299	tRNACys-GCA
GUCAGGAUGGCCGAGCGGUCUA	3.01	13.24	0.227341	tRNALeu-CAG
CCGGCUCGGAGGACCA	0.94	4.17	0.22542	tRNATyr-GTA
GCAUGGGUGGUUCAGUGGU	13.72	61.04	0.224771	tRNAGly-GCC
GUUUCCGUAGUGUAGUGGUUAU	25.18	112.51	0.223802	tRNAVal-AAC,tRNAVal-CAC
CGUGGGUUCGUGCCCCACGUUGGGCGCCA	4.7	21.08	0.22296	tRNALys-CTT
GGGGAUGUAGCUCAGUGGUAGAGCA	49.04	220.37	0.222535	tRNACys-GCA,tRNAAla-TGC,tRNAAla-CGC,tRNAAla-AGC
GUUUCCGUAGUGUAGUGGUCAU	3.38	15.2	0.222368	tRNAVal-AAC
GCUUCUGUAGUGUAGUGGUUAUCACGUUU	1.69	7.6	0.222368	tRNAVal-CAC
GUCAGGAUGGCCGAGCGGUCUAAGG	21.23	95.6	0.222071	tRNALeu-CAG
AGGUCACGUCGGGGUCACCA	2.44	11.03	0.221215	tRNATrp-CCA
GGUCUAGUGGUUAGGAUUCGGCG	21.05	96.09	0.219065	tRNA-derived_pseudogene,tRNAGlu-CTC
GGUAGCGUGGCCGAGCGG	3.38	15.44	0.218912	tRNALeu-AAG,tRNALeu-TAG
AGCAGAGUUGCGCAGCGGAAGCGUGCUGGG	1.5	6.86	0.218659	tRNAMet-CAT
AUAGCUCAGUCGGUAGAGCAU	0.75	3.43	0.218659	tRNALys-TTT
GUGGGUUCGAAUCCCAUCCUCGUCGCCA	0.75	3.43	0.218659	tRNASer-GCT
GUUCGUUUCCCGGCCAACGCACCA	0.75	3.43	0.218659	tRNAGly-TCC
GCCCGGAUAGCUCAGUCGGUAGAG	808.18	3706.78	0.218028	tRNALys-TTT
UCAGUCGGUAGAGCAUC	1.32	6.13	0.215334	tRNALys-TTT
GCCCGAAUAGCUCAGUCGGUAGAGCA	1.88	8.82	0.213152	tRNALys-TTT
UCCGUAGUGUAGUGGUUAU	0.94	4.41	0.213152	tRNAVal-CAC,tRNAVal-AAC
GGCUCGUUGGUCUAGGGGUAUGAUUC	22.17	104.42	0.212316	tRNAPro-CGG,tRNAPro-TGG,tRNAPro-AGG
GUCCGGAUAGCUCAGUCGGUAGAG	6.95	32.85	0.211568	tRNALys-TTT
UGGUAGAAUUCUCGCCUGCCAC	1.13	5.39	0.209647	tRNAGly-GCC
GUCAGGAUGGCCGAGUG	3.01	14.46	0.20816	tRNALeu-CAA
ACCCGGAUAGCUCAGUCGGUAGAG	0.56	2.7	0.207407	tRNALys-TTT
CAUAUCCCGGACGAGCCCCCA	0.56	2.7	0.207407	tRNAPro-TGG,tRNAPro-CGG,tRNAPro-AGG
GGCUCGUUGGUCUAGGGGUAUGAUUCUAA	0.56	2.7	0.207407	tRNAPro-TGG,tRNAPro-AGG,tRNAPro-CGG
GGGGUGUAGCUCAGUGGUAGAG	0.56	2.7	0.207407	tRNAAla-CGC,tRNAAla-TGC,tRNAVal-AAC,tRNACys-GCA,tRNAAla-AGC
GUCAGGAUGGCCGAGCGGA	0.56	2.7	0.207407	tRNALeu-CAG
GUCAGGAUGGCCGAGUGGUCUAAGGCGCCA	0.56	2.7	0.207407	tRNALeu-CAA
UGGUGGUCUAGUGGUUA	0.56	2.7	0.207407	tRNA-derived_pseudogene,tRNAGlu-CTC
CAGUCGGUAGAGCAUGAGACU	2.44	11.77	0.207307	tRNALys-CTT
GCCCGUAUAGCUCAGUCGGUAGAG	1.32	6.37	0.207221	tRNALys-TTT
GGGGGUGUAGCUCAGUGGUA	5.64	27.45	0.205464	tRNACys-GCA,tRNAAla-TGC,tRNAAla-AGC,tRNAAla-CGC,tRNAVal-AAC
CGGAUAGCUCAGUCGGUAGAG	2.25	11.03	0.203989	tRNALys-TTT
GGGGGUAUAGCUCAGGGGUAGAGCAUUUG	2.25	11.03	0.203989	tRNACys-GCA
GCUUCUGUAGUGUAUUGGUUAUCACGUUC	0.75	3.68	0.203804	tRNAVal-CAC
AGUCGGUAGAGCAUGGGAC	3.19	15.69	0.203314	tRNALys-CTT
GGUAGCGUGGCCGAGCGGUCU	1.69	8.33	0.202881	tRNALeu-AAG,tRNALeu-TAG
GGGGGUGUAGCUCAGUGGUAGAGCAUUUGA	0.94	4.66	0.201717	tRNACys-GCA
GUUUCCGUAGUGUAGUGGA	1.13	5.64	0.200355	tRNAVal-CAC,tRNAVal-AAC
GACGAGGUGGCCGAGUGG	3.38	16.91	0.199882	tRNASer-GCT
GGGGGCAUAGCUCAGUGGUAGAGCAU	2.63	13.24	0.19864	tRNACys-GCA
CGUUUCCGGCUCGAAGGACCA	5.83	29.42	0.198165	tRNATyr-GTA
CCGGGCAGAAGCACCA	1.5	7.6	0.197368	tRNAVal-CAC
GGGGGUAUAGCUCAGGGGUAGAGCAU	4.32	22.06	0.19583	tRNACys-GCA
GGAUAGCUCAGUCGGUAGAG	4.51	23.04	0.195747	tRNALys-TTT
GGCUCGUUGGUCUAGGGG	2.25	11.52	0.195312	tRNAPro-TGG,tRNAPro-AGG,tRNAPro-CGG
GUAGUCGUGGCCGAGUGG	21.61	112.02	0.192912	tRNASer-TGA,tRNASer-AGA
GCCCGGCUAGCUCAGUCGGUAGAGCA	10.15	52.7	0.1926	tRNALys-CTT
CCUUGGAGGCGUGGGU	1.32	6.86	0.19242	tRNA-derived_pseudogene,tRNALeu-CAG
GUGGGUUCGUAUCCCAUCCUCGUCGCCA	1.32	6.86	0.19242	tRNASer-GCT
CGUGGGUUCGUAUCCCAUCCUCGUCGCCA	1.13	5.88	0.192177	tRNASer-GCT
GCCCGGAUAGCUCAGUCGGUAGAGCA	59.94	312.04	0.192091	tRNALys-TTT
AGCGGAAGCGUGCUGGGCCCA	0.94	4.9	0.191837	tRNAMet-CAT
GCUUGGAUAGCUCAGUCGGUAGAGCAU	0.94	4.9	0.191837	tRNALys-TTT
GUUCAGGUCACGUCGGGGUCACCA	0.94	4.9	0.191837	tRNATrp-CCA
GCAUUGGUGGUUCAGUGGUAGA	2.44	12.75	0.191373	tRNAGly-CCC,tRNAGly-GCC
AACCGGGCAGAAGCACCA	1.5	7.84	0.191327	tRNAVal-CAC
CCCACCUUCGUCGCCA	0.75	3.92	0.191327	tRNASer-GCT
CGGAAGCGUGCUGGGCCCAUAACC	0.75	3.92	0.191327	tRNAMet-CAT
CUGGUUCGAUUCCGGCUCGAAGGACCA	0.75	3.92	0.191327	tRNATyr-GTA
GCCCGGAUAGCUCAGGCGGUAGAG	0.75	3.92	0.191327	tRNALys-TTT
GGAUGGAGGCGUGGGU	0.75	3.92	0.191327	tRNALeu-CAA
UCCCGGCCAAUGCACCA	0.75	3.92	0.191327	tRNAGly-CCC,tRNAGly-GCC
AGCGGUUAGGAUUCCUGG	0.56	2.94	0.190476	tRNAGlu-TTC,tRNA-derived_pseudogene
CCGCUGGUGUAGUGGUAUCAUGCAAG	0.56	2.94	0.190476	tRNAGly-CCC
CGGAACCGGGCGGAAACACCA	0.56	2.94	0.190476	tRNAVal-CAC,tRNAVal-AAC
GCCCGGAUAGCUCAGUAGGUAGAGCAU	0.56	2.94	0.190476	tRNALys-TTT
GCCCGGAUAGCUCCGUCGGUAGAG	0.56	2.94	0.190476	tRNALys-TTT
GCCUGGAUAGCUCAGUUGGUAGAGCAUC	0.56	2.94	0.190476	tRNALys-TTT
GCGCCGCUGGUGUAGUGGUAUCAUGC	0.56	2.94	0.190476	tRNAGly-CCC
GGUUCCAUAGUGUAGUGGUUAU	0.56	2.94	0.190476	tRNAVal-TAC
GUCAGGAUGGCCGAGUGGUCUAAGGCC	0.56	2.94	0.190476	tRNALeu-CAA
GUGUAAUGGUUAGCACUCUGGA	0.56	2.94	0.190476	tRNAGln-TTG,tRNAGln-CTG
GCCUGGGUAGCUCAGUCGGUAGAGCAU	4.89	25.74	0.189977	tRNALys-TTT
GGGGAUGUAGCUCAGUGGUAGAGCGC	9.77	51.72	0.188902	tRNAAla-TGC,tRNAAla-CGC,tRNAAla-AGC
CGUAACCGGGCGGAAACACCA	1.88	10.05	0.187065	tRNAVal-CAC,tRNAVal-AAC
CGGAAGCGUGCUGGGCC	4.7	25.25	0.186139	tRNAThr-CGT,tRNAMet-CAT
GCCCGGAUAGCUCAGUCGGUAGAGCAA	1.5	8.09	0.185414	tRNALys-TTT
GCCCGGCUAGCUCAGUCGGUAGAG	1.5	8.09	0.185414	tRNALys-CTT
GGCUAGCUCAGUCGGUAGAGCAUGAG	0.94	5.15	0.182524	tRNALys-CTT
GUUCAGGUCCCUGUUCGGGCGCCA	0.94	5.15	0.182524	tRNALys-TTT
GGCUCUUUGGUCUAGGGGUAUGAUUC	2.44	13.48	0.181009	tRNAPro-TGG,tRNAPro-AGG,tRNAPro-CGG
AAGCCAGGGAUUGUGGGU	0.75	4.17	0.179856	tRNAArg-CCT
CGGAAGCGUGCUGGGCCCAUAACCCAG	0.75	4.17	0.179856	tRNAMet-CAT
GUCAGGAUGGCCGAGCGGUCU	8.64	48.29	0.178919	tRNALeu-CAG
UGGUAGAGCAUUUGACUGC	1.88	10.54	0.178368	tRNACys-GCA
GCCCGAAUAGCUCAGUCGGUAGAG	15.41	86.53	0.178089	tRNALys-TTT
UCUCCGGAUGGAGGCGUGGGUU	1.13	6.37	0.177394	tRNALeu-CAA
GCCUGGAUAGCUCAGUCGGUAGAGCAU	10.15	57.6	0.176215	tRNALys-TTT
CGGCUAGCUCAGUCGGUAGAGCAUGAGA	0.56	3.19	0.175549	tRNALys-CTT
GGCUCUGUCGCGCAAUGGAUAGCGCAUU	0.56	3.19	0.175549	tRNAArg-TCT
GGGGGUAUAGCUCAGGGGCAGAGCAUU	0.56	3.19	0.175549	tRNACys-GCA
UCUCGGUGGGACCUCCA	0.56	3.19	0.175549	tRNAGln-TTG
GCCCGGAUAGCUCAGUCGGUAGAGAA	18.98	108.59	0.174786	tRNALys-TTT
GCCCGGAUAGCUCAGUCGGUAGAGCAUU	0.94	5.39	0.174397	tRNALys-TTT
UAGCUCAGUCGGUAGAGCAUG	2.25	12.99	0.17321	tRNALys-CTT
CAGUCGGUAGAGCAUCA	1.69	9.81	0.172273	tRNALys-TTT
CCGGCUAGCUCAGUCGGUAGAGCAUG	1.69	9.81	0.172273	tRNALys-CTT
CAGUCGGUAGAGCAUGAGACUC	4.51	26.23	0.171941	tRNALys-CTT
GCCCGGCUAGCUCAGUCGGUAG	3.57	20.84	0.171305	tRNALys-CTT
AAUGGAUAAGGCAUUGGCUU	1.13	6.62	0.170695	tRNAArg-CCT
GGCUCGUUAGUCUAGGGGUAUGAUUC	1.13	6.62	0.170695	tRNAPro-TGG,tRNAPro-AGG,tRNAPro-CGG
GCCCGUAUAGCUCAGUCGGUAGAGCAU	0.75	4.41	0.170068	tRNALys-TTT
UGGCUAGGAUUCGGCGCUUU	0.75	4.41	0.170068	tRNAGlu-TTC,tRNA-derived_pseudogene
GUAUCCCAUCCUCGUCGCCA	0.94	5.64	0.166667	tRNASer-GCT
UAGUGGCUAGGAUUCGGCG	0.94	5.64	0.166667	tRNA-derived_pseudogene,tRNAGlu-TTC
GUUUCCGUAGUGUAGUGG	8.64	52.21	0.165486	tRNAVal-CAC,tRNAVal-AAC
GGGGAUGUAGCUCAGUGGUAGAGCUC	1.13	6.86	0.164723	tRNAAla-CGC,tRNAAla-AGC,tRNAAla-TGC
CUAGUGGUUAGGAUUCGGCGC	0.56	3.43	0.163265	tRNAGlu-CTC,tRNA-derived_pseudogene
GCCCGGAUAGCUCAGUCGGCAGAGCAU	0.56	3.43	0.163265	tRNALys-TTT
GCGCCGCUGGUGUAGUGGUAUCAU	0.56	3.43	0.163265	tRNAGly-CCC
GGGGAUGUAGCUCAGUGGUAU	0.56	3.43	0.163265	tRNAAla-CGC,tRNAAla-TGC,tRNAAla-AGC
GGGGGUAUAGCUCAGGUGGUAGAGCAU	0.56	3.43	0.163265	tRNACys-GCA
UCCCUUGGAGGCGUGGGU	0.56	3.43	0.163265	tRNALeu-CAG
GGGGGUAUAGCUCAGUGGUAGAGCG	2.44	14.95	0.163211	tRNAAla-AGC
GUUUCUGUAGUGUAGUGGUUAUCACGUUC	1.32	8.09	0.163164	tRNAVal-CAC,tRNAVal-AAC
AGUCGGUAGAGCAUGGGA	8.46	52.21	0.162038	tRNALys-CTT
GGGGAUGUAGCUCAGUGGUAGAGCUCA	1.5	9.31	0.161117	tRNAAla-TGC,tRNAAla-CGC,tRNAAla-AGC
GCCUGGGUAGCUCAGUCGGUAGAGCAUCAG	0.75	4.66	0.160944	tRNALys-TTT
UAAGCCAGGGAUUGUGGGUU	0.75	4.66	0.160944	tRNAArg-CCT
GUGGGUUCGUGCCCCACGUUGGGCGCCA	5.64	35.05	0.160913	tRNALys-CTT
GACGAGGUGGCCGAGU	4.51	28.19	0.159986	tRNASer-GCT
CUGGACUCUGAAUCCAGCGAUCCGAGUU	0.94	5.88	0.159864	tRNAGln-CTG
CUAGUGGUUAGGAUUCGGCGCU	1.13	7.11	0.158931	tRNA-derived_pseudogene,tRNAGlu-CTC
GUUUCCGGCUCGAAGGACCA	1.13	7.11	0.158931	tRNATyr-GTA
GCCCGGCUAGCUCAGUCGGUAGA	4.32	27.21	0.158765	tRNALys-CTT
GCCCGGCUAGCUCAGUCGGUAGAGCAU	14.28	90.21	0.158297	tRNALys-CTT
GCUUGGAUAGCUCAGUCGGUAGAG	2.25	14.22	0.158228	tRNALys-TTT
CGGAUGGAGGCGUGGGUU	1.5	9.56	0.156904	tRNALeu-CAA
GACUCUGAAUCCAGCGAUCCGAG	5.07	32.36	0.156675	tRNAGln-CTG
CGGAAGCGUGCUGGGCCCAUAA	4.7	30.15	0.155887	tRNAMet-CAT
CAGGUCACGUCGGGGUCACCA	3.01	19.36	0.155475	tRNATrp-CCA
ACCGGGAUGGCUGAGUGGUU	0.38	2.45	0.155102	tRNALeu-TAA
AGUUGGUUAGAGCUUGGU	0.38	2.45	0.155102	tRNAIle-AAT
AUGGAUAACGCGUCUGACUACGGAUCAG	0.38	2.45	0.155102	tRNAArg-ACG,tRNA-derived_pseudogene
CCGGAUGGAGGCGUGGGUU	0.38	2.45	0.155102	tRNALeu-CAA
CGGAAGCGUGCUGGGCCCAA	0.38	2.45	0.155102	tRNAMet-CAT
CGGUUCGUAUCCGAGUCACGGCACCA	0.38	2.45	0.155102	tRNAHis-GTG
GACGAGGUGGCCGAGUGGA	0.38	2.45	0.155102	tRNASer-GCT
GCCCGGAUAGUUCAGUCGGUAGAG	0.38	2.45	0.155102	tRNALys-TTT,tRNA-derived_pseudogene
GGCUCGUUGGUCUAGGGGCAUGAUUCUC	0.38	2.45	0.155102	tRNAPro-AGG,tRNAPro-CGG,tRNAPro-TGG
GGUUAGGAUUCGGCGCUCA	0.38	2.45	0.155102	tRNA-derived_pseudogene,tRNAGlu-CTC
GUUCGUAACCGGGCGGAAACACCA	0.38	2.45	0.155102	tRNAVal-AAC,tRNAVal-CAC
UAAUGGAUAAGGCAUUGGCUUC	0.38	2.45	0.155102	tRNAArg-CCT
UAGUGGUUAGGAUUCG	0.38	2.45	0.155102	tRNA-derived_pseudogene,tRNAGlu-CTC
UCCCAUAUGGUCUAGCGGUU	0.38	2.45	0.155102	tRNAGlu-TTC
UCCCGGACGAGCCCCC	0.38	2.45	0.155102	tRNAPro-AGG,tRNAPro-CGG,tRNAPro-TGG
UCCCUGGUGGUCUAGUGGUUAGGAUUCUUC	0.38	2.45	0.155102	tRNAGlu-CTC
CAGUCGGUAGAGCAUGG	1.13	7.35	0.153741	tRNALys-CTT
CCUGCCGACUACGCCA	1.13	7.35	0.153741	tRNASer-AGA,tRNASer-TGA
GUCAGGAUGGCCGAGUGGUCUAAGGCGC	1.13	7.35	0.153741	tRNALeu-CAA
GUUUCCGUAGUGUAGUGGUUAUCAC	1.88	12.26	0.153344	tRNAVal-AAC,tRNAVal-CAC
CCGGUUCGUAACCGGGCAGAAGCACCA	0.94	6.13	0.153344	tRNAVal-CAC
GCCCGGAUAGCUCAUUCGGUAGAG	0.94	6.13	0.153344	tRNALys-TTT
GGCUCGUUGGUCUAUGGGUAUGAUUCUC	0.94	6.13	0.153344	tRNAPro-AGG,tRNAPro-TGG,tRNAPro-CGG
GACCGGAUAGCUCAGUCGGUAGAG	0.75	4.9	0.153061	tRNALys-TTT
GAGGGUUCGUGUCCCUUCGUGGUCGCCA	0.75	4.9	0.153061	tRNAArg-TCG,tRNAArg-CCG
GUCAGGAUGGCCGAGUGGUCUAAGGCUC	0.75	4.9	0.153061	tRNALeu-CAA
UCAGUCGGUAGAGCAUGGGA	0.75	4.9	0.153061	tRNALys-CTT
UCGUAUCCGGCUCGAAGGACCA	0.75	4.9	0.153061	tRNATyr-GTA
GCCCGGAUACCUCAGUCGGUAGAG	1.5	9.81	0.152905	tRNALys-TTT
CAGAUCCCGGACGAGCCCCCA	0.56	3.68	0.152174	tRNAPro-CGG,tRNAPro-TGG,tRNAPro-AGG
GCCCGGAUAGCUCAGUAGGUAGAG	0.56	3.68	0.152174	tRNALys-TTT
GCCCGGAUAGCUUAGUCGGUAGAG	0.56	3.68	0.152174	tRNALys-TTT
GCCCGGCUAACUCAGUCGGUAGAGCAUGAG	0.56	3.68	0.152174	tRNALys-CTT
GCUCAGUCGGUAGAGCA	0.56	3.68	0.152174	tRNALys-CTT,tRNALys-TTT
GGGGGUAUAGCUCAGUGGU	0.56	3.68	0.152174	tRNACys-GCA,tRNAAla-AGC,tRNA-derived_pseudogene
GGUUCGUAACCGGGCGGAA	0.56	3.68	0.152174	tRNAVal-AAC,tRNAVal-CAC
GUCGGUAGAGCAUGAGACUCA	0.56	3.68	0.152174	tRNALys-CTT
GCAUGGGUGGUUCAGUGGUA	22.74	149.77	0.151833	tRNAGly-GCC
UCUGGACUCUGAAUCCAGCGAUCCGAGU	1.69	11.28	0.149823	tRNAGln-CTG
CGGAAGCGUGCUGGGCCCAUA	3.01	20.1	0.149751	tRNAMet-CAT
UCCCUGGUGGUCUAGUGGCU	1.32	8.82	0.14966	tRNAGlu-TTC,tRNA-derived_pseudogene
AUCCGGCUCGAAGGACCA	1.5	10.05	0.149254	tRNATyr-GTA
UGGUUAGGAUUCGGCG	17.66	118.64	0.148854	tRNA-derived_pseudogene,tRNAGlu-CTC
GGGGGUGUAGCUCAGUGGUAGAGCGC	1.13	7.6	0.148684	tRNAAla-AGC,tRNAAla-CGC,tRNAAla-TGC
GGGGGCAUAGCUCAGUGGUAGAGCA	3.01	20.35	0.147912	tRNACys-GCA
GGGGGUAUAGCUCAGUGGUAGAGCAUUUG	6.01	40.69	0.147702	tRNACys-GCA
GCCCGGCUAGCUCAGUCGGGAGAGCAUG	0.94	6.37	0.147567	tRNALys-CTT
GUUUCCCGGCCAACGCACCA	0.94	6.37	0.147567	tRNAGly-TCC
GGGGGUAUAGCUCAGUGGUAGAGCAU	3.76	25.74	0.146076	tRNACys-GCA
UUGGCUUCCUAAGCCAGGGAUUGUGGG	0.75	5.15	0.145631	tRNAArg-CCT
UCCCGGGUUUCGGCACCA	2.07	14.22	0.14557	tRNAPhe-GAA
GCCCGGAUAGCUCAGUCGGUAGAGA	7.89	54.42	0.144983	tRNALys-TTT
GCCCGGCUAGCUCAGUCGG	1.88	12.99	0.144727	tRNALys-CTT
GUCAGGAUGGCCGAGU	1.13	7.84	0.144133	tRNALeu-CAA
GCCCGGAUAGCUCAGUCGGUAGCG	0.56	3.92	0.142857	tRNALys-TTT
UUCGGCUGUUAACCGAAAGGUUGGUGGU	0.94	6.62	0.141994	tRNAAsn-GTT
GGCUCGUUAGUCUAGGGGUAUGAUUCU	1.32	9.31	0.141783	tRNAPro-AGG,tRNAPro-TGG,tRNAPro-CGG
GGCUCGUUGGUCUAGGGGUAUGAUUCU	26.49	188.01	0.140897	tRNAPro-TGG,tRNAPro-AGG,tRNAPro-CGG
ACCGGUCGGAAACACCA	0.38	2.7	0.140741	tRNAVal-CAC,tRNAVal-AAC,tRNA-derived_pseudogene
AGCGGUCUAAGGCUGCG	0.38	2.7	0.140741	tRNA-derived_pseudogene
AGGAUGGCCGAGCGGUCUAAGGCU	0.38	2.7	0.140741	tRNALeu-CAG
CGGAGCUGGGGAUUGUGGG	0.38	2.7	0.140741	tRNAArg-CCG
CGGCUGUUAACCGAAAGGUUGG	0.38	2.7	0.140741	tRNAAsn-GTT
CUGCCACGCGGGAGGCCCGGGU	0.38	2.7	0.140741	tRNAGly-GCC
GCCUGGAUAGCUCAGUCGGA	0.38	2.7	0.140741	tRNALys-TTT
GGGGAUGUAACUCAGUGGUAGAGCGCA	0.38	2.7	0.140741	tRNAAla-CGC,tRNAAla-TGC,tRNAAla-AGC
GUUCGAAUCCGAGUCACGGCACCA	0.38	2.7	0.140741	tRNAHis-GTG
UAGUGGUUAGGAUUCGUCG	0.38	2.7	0.140741	tRNAGlu-CTC,tRNA-derived_pseudogene
UGGUCUAGUGGCUAGGAUUCGGCG	0.38	2.7	0.140741	tRNAGlu-TTC,tRNA-derived_pseudogene
UGGUGGUCUAGUGGUUAG	0.38	2.7	0.140741	tRNAGlu-CTC,tRNA-derived_pseudogene
GGCUCGUUCGUCUAGGGGUAUGAUUC	1.88	13.48	0.139466	tRNAPro-CGG,tRNAPro-TGG,tRNAPro-AGG
AGUGGUAGAGCAUUUGACUGCAGAU	0.75	5.39	0.139147	tRNACys-GCA
AGUGGUUAGGAUUCGGCGCUCUCA	0.75	5.39	0.139147	tRNA-derived_pseudogene,tRNAGlu-CTC
AGUCGGUAGAGCAUGAG	5.26	37.99	0.138457	tRNALys-CTT
CGGAAGCGUGCUGGGCCCAUAAC	0.94	6.86	0.137026	tRNAMet-CAT
CAGUCGGUAGAGCACA	1.88	13.73	0.136926	tRNA-derived_pseudogene,tRNALys-CTT
GUGGUUAGGAUUCGGC	1.5	11.03	0.135993	tRNAGlu-CTC,tRNA-derived_pseudogene
GUGGUUCGUGCCCACCCAGGGACGCCA	6.2	45.84	0.135253	tRNAAsn-GTT
GUGGUUAGGAUUCGGCGCUC	2.82	21.08	0.133776	tRNA-derived_pseudogene,tRNAGlu-CTC
CGUAUCCCAUCCUCGUCGCCA	0.75	5.64	0.132979	tRNASer-GCT
GCCCGGAUAGCUCAGUC	0.75	5.64	0.132979	tRNALys-TTT
UUCGAAACCGGGCGGAAACACCA	1.5	11.52	0.130208	tRNAVal-AAC,tRNAVal-CAC
CUGGUUCGUUUCCGGCUCGAAGGACCA	5.07	38.97	0.1301	tRNATyr-GTA
GGGGGUAUAGCUCAGGGG	1.69	12.99	0.1301	tRNACys-GCA
AAUGGAUAAGGCACUGG	0.38	2.94	0.129252	tRNAArg-CCT
ACCAGGAUGGCCGAGUG	0.38	2.94	0.129252	tRNALeu-TAA
CGGAAGCGUACUGGGCCC	0.38	2.94	0.129252	tRNAMet-CAT,tRNAThr-CGT
GCCGGAUAGCUCAGUCGGUAGAG	0.38	2.94	0.129252	tRNALys-TTT
GCUCAGUCGGUAGAGCAUCAGACUUUUA	0.38	2.94	0.129252	tRNALys-TTT
GUCGGUAGAGCAUCAG	0.38	2.94	0.129252	tRNALys-TTT
UCAGUCGGUAGAGCAUGG	0.38	2.94	0.129252	tRNALys-CTT
UUCCCGGCCAAUGCACCA	0.38	2.94	0.129252	tRNAGly-CCC,tRNAGly-GCC
UUUCCGGCUCGAAGGACCA	0.38	2.94	0.129252	tRNATyr-GTA
GCCCGGAUAGCUCAGUCGGUAGAGC	13.53	104.91	0.128968	tRNALys-TTT
GGCUCGUUCGUCUAGGGGUAUGAUUCU	3.76	29.17	0.1289	tRNAPro-AGG,tRNAPro-CGG,tRNAPro-TGG
GAUCCCAUCCUCGUCGCCA	0.94	7.35	0.127891	tRNASer-GCT
CGAUUCCGGCUCGAAGGACCA	0.75	5.88	0.127551	tRNATyr-GTA
CGGAAGCGUGCUGGGCCC	31.76	251.99	0.126037	tRNAMet-CAT,tRNAThr-CGT
CCCGGCUAGCUCAGUCGGUAGAGCAUGAG	1.13	9.07	0.124587	tRNALys-CTT
GGGGGUAUAGCUCAGCGGUAGAGCG	2.25	18.14	0.124035	tRNAAla-AGC
GUUUCCGUAGUGUAGUGGUCAUC	0.94	7.6	0.123684	tRNAVal-AAC
GCUUCUGUAGUGUAGUGG	1.69	13.73	0.123088	tRNAVal-CAC
GGGGGAUUAGCUCAAA	1.5	12.26	0.122349	tRNAAla-AGC
CAUCCCGGACGAGCCCCCA	1.32	10.79	0.122335	tRNAPro-TGG,tRNAPro-CGG,tRNAPro-AGG
CAUCACGUCGGGGUCACCA	1.69	13.97	0.120974	tRNATrp-CCA
GCCUGGAUAGCUCAGUUGGUAGAGCAU	0.56	4.66	0.120172	tRNALys-TTT
AGUCGGUAGAGCAUGAGAC	25.93	216.69	0.119664	tRNALys-CTT
AAAUCCCGGACGAGCCCCCA	0.38	3.19	0.119122	tRNAPro-AGG,tRNAPro-CGG,tRNAPro-TGG
CCACCCAGGGACGCCA	0.38	3.19	0.119122	tRNAAsn-GTT,tRNAAsn-ATT
CGGGUUCGACUCCCGGUAUGGGAACCA	0.38	3.19	0.119122	tRNAGlu-TTC
GCCCGGAUAGCUCAGUCUGUAGAG	0.38	3.19	0.119122	tRNALys-TTT
GCCCGGCUAGCUCAGUCGGUAGAGGAUGGG	0.38	3.19	0.119122	tRNALys-CTT
GGCUCGUUCGUCUAGGGGUA	0.38	3.19	0.119122	tRNAPro-CGG,tRNAPro-TGG,tRNAPro-AGG
UCUAGUGGUUAGGAUUCGGCGC	0.38	3.19	0.119122	tRNAGlu-CTC,tRNA-derived_pseudogene
UGGCUAGGAUUCGGCGCUU	0.38	3.19	0.119122	tRNAGlu-TTC,tRNA-derived_pseudogene
UGGGGUGCGAGAGGUCC	0.38	3.19	0.119122	tRNAPro-TGG,tRNAPro-CGG,tRNAPro-AGG
UUUGGGUGCGAGAGGUCCC	0.38	3.19	0.119122	tRNAPro-TGG
AAUCCCAUCCUCGUCGCCA	0.75	6.37	0.117739	tRNASer-GCT
CCCGGACGAGCCCCCA	0.75	6.37	0.117739	tRNAPro-AGG,tRNAPro-TGG,tRNAPro-CGG
GCCCGGAUAGCUCAGCCGGUAGAG	0.75	6.37	0.117739	tRNALys-TTT
UGGGUUCGUAUCCCACCUUCGUCGCCA	0.75	6.37	0.117739	tRNASer-GCT
GGCUCGUUGGUCUAGGGGUAUGAUUUUC	1.5	12.75	0.117647	tRNAPro-AGG,tRNAPro-CGG,tRNAPro-TGG
GCUUCUGUAGUGUAGUGGUUAUCACUUUC	11.65	99.03	0.117641	tRNAVal-CAC
GUGGUUCGAGCCCACCCAGGGACGCCA	2.07	17.65	0.11728	tRNAAsn-GTT
GACCCAGUGGCCUAAUGGAUAAGGCAUCA	1.88	16.18	0.116193	tRNAArg-CCG
GCCCGGAUAGCUCAGUCGGGAGAGCAU	0.94	8.09	0.116193	tRNALys-TTT
GCAUGGGUGGUUCAGUGGUAGAAUUCUC	2.44	21.08	0.11575	tRNAGly-GCC
GCCCGGAUAGCUCAGUCGGUAGAU	2.44	21.08	0.11575	tRNALys-TTT
UCAGUCGGUAGAGCAUGAG	4.51	38.97	0.11573	tRNALys-CTT
UCGGUAGAGCAUGAGACU	4.7	40.69	0.115507	tRNALys-CTT
GCUCAGUCGGUAGAGCAUGAG	2.63	22.8	0.115351	tRNALys-CTT
GUGGUUAGGAUUCGGCGCUCUCA	0.56	4.9	0.114286	tRNAGlu-CTC,tRNA-derived_pseudogene
UCCAAUGGAGGCGUGGGU	2.63	23.29	0.112924	tRNALeu-CAA
CAAUGGAGGCGUGGGUU	0.94	8.33	0.112845	tRNALeu-CAA
UCAGUCGGUAGAGCAUCAGA	1.13	10.05	0.112438	tRNALys-TTT
CGGGAGACCGGGGUUCGAUUCCCCGACGG	3.57	31.87	0.112018	tRNAAsp-GTC
GCUUCUGUAGUGUAGUGGUUAUCACGUUC	85.5	767.49	0.111402	tRNAVal-CAC
AGCAGAGUGGCGCAGCGGAAGCGUGC	0.38	3.43	0.110787	tRNAMet-CAT
GCCCGGAUAGAUCAGUCGGUAGAG	0.38	3.43	0.110787	tRNALys-TTT
GCCCGGCUAGCUCAGUCGGUAAAGCAUGGG	0.38	3.43	0.110787	tRNALys-CTT
GGCCGCGUGGCCUAAUGGAUAAGGCGUCUG	0.38	3.43	0.110787	tRNAArg-CCG,tRNAArg-TCG
GUUUCCGUAGUGUAGUGGUCA	0.38	3.43	0.110787	tRNAVal-AAC
UGGGUUCGAAUCCCAUCCUCGUCGCC	0.38	3.43	0.110787	tRNASer-GCT
CCGGGUUUCGGCACCA	1.32	12.01	0.109908	tRNAPhe-GAA
CGAAACCGGGCGGAAACACCA	1.32	12.01	0.109908	tRNAVal-CAC,tRNAVal-AAC
CGUUUCCCGGCCAACGCACCA	3.57	32.6	0.109509	tRNAGly-TCC
CUCCGGAGCUGGGGAUUGUGGGUU	0.56	5.15	0.108738	tRNAArg-CCG
UCAGUCGGUAGAGCAUGAGAC	0.56	5.15	0.108738	tRNALys-CTT
GCCCGGCUAGCUCAGUCGGUAGAGCAUGAG	24.43	225.27	0.108448	tRNALys-CTT
UGGGUUCGUAUCCCAUCCUCGUCGCCA	3.19	29.42	0.10843	tRNASer-GCT
CUCAGUCGGUAGAGCAUCAG	3.57	33.09	0.107888	tRNALys-TTT
AUGGAUAAGGCAUUGGCUU	1.32	12.26	0.107667	tRNAArg-CCT
GCGGAAGCGUGCUGGG	0.94	8.82	0.106576	tRNAThr-CGT,tRNAMet-CAT
UGGUUCGUUUCCGGCUCGAAGGACCA	0.94	8.82	0.106576	tRNATyr-GTA
UGGGUUCGUGCCCCACGUUGGGCGCCA	4.7	44.12	0.106528	tRNALys-CTT
UCCUGCCGACUACGCCA	6.01	56.87	0.10568	tRNASer-AGA,tRNASer-TGA
CAGUCGGUAGAGCAUGAGACUCA	0.75	7.11	0.105485	tRNALys-CTT
GCUCGGAUAGCUCAGUCGGUAGAGCAU	1.13	10.79	0.104727	tRNALys-TTT
UCCCACAUGGUCUAGCGGUUAGGAUUCCU	2.07	19.86	0.10423	tRNAGlu-TTC
AUAGCUCAGUCGGUAGAGCAUC	0.56	5.39	0.103896	tRNALys-TTT
GUCAGGAUGGCCGAGCGGUU	0.56	5.39	0.103896	tRNALeu-CAG
CCGGAUGGAGGCGUGGGU	1.32	12.75	0.103529	tRNALeu-CAA
UGGGUUCGGGCCCCACGUUGGGCGCCA	3.19	30.89	0.10327	tRNALys-CTT
AUCCCGGACGAGCCCC	0.38	3.68	0.103261	tRNAPro-CGG,tRNAPro-AGG,tRNAPro-TGG
CAGUCGGCUAGAGCUUGGUGC	0.38	3.68	0.103261	tRNAIle-AAT
GGCUCUGUGGCGCAAUGGAUAGCGCAUUU	0.38	3.68	0.103261	tRNAArg-TCT
GGGGUGUAGCUCAGUGGUAGAGCGCGUG	0.38	3.68	0.103261	tRNAAla-CGC,tRNAAla-AGC
UCAGUCGGUAGAGCAUGAGACUC	0.38	3.68	0.103261	tRNALys-CTT
UGACAGUGCGAGCGGAG	0.38	3.68	0.103261	tRNA-derived_pseudogene
GAAGAUCGCGGGUUCG	7.52	73.29	0.102606	tRNAThr-CGT
CGAUUCCCGGCCAACGCACCA	1.13	11.03	0.102448	tRNAGly-TCC
UUCCGGCUCGAAGGACCA	3.01	29.66	0.101483	tRNATyr-GTA
GGGGGUGUAGCUCAGUGGUAGAGCGCG	3.76	37.26	0.100913	tRNAAla-CGC,tRNAAla-AGC
CAGUCGGUAGAGCAUGAG	10.52	105.65	0.0995741	tRNALys-CTT
CUCAGUCGGUAGAGCAUGG	0.56	5.64	0.0992908	tRNALys-CTT
GCUCAGUCGGUAGAGCAUCAGACUUU	0.56	5.64	0.0992908	tRNALys-TTT
GUGGUUCGUUCCCACCCAGGGACGCCA	0.56	5.64	0.0992908	tRNAAsn-GTT
GGGGAUGUAGCUCAGUGGUAGAGCGCA	30.25	306.65	0.0986467	tRNAAla-CGC,tRNAAla-TGC,tRNAAla-AGC
UCCAGGGUUCAUGUCCCUGUUCGGGCGCCA	1.69	17.16	0.0984848	tRNALys-TTT
GCCCGGAUAGCUCAGUCGGUAGAGCAUCAG	8.08	82.12	0.0983926	tRNALys-TTT
GGGGGUGUAGCUCAGUGGUAGAGCA	3.01	30.89	0.0974425	tRNAAla-TGC,tRNACys-GCA
AGGGUUCAUGUCCCUGUUC	0.38	3.92	0.0969388	tRNA-derived_pseudogene
AGUCCCUGUUCGGGCGCCA	0.38	3.92	0.0969388	tRNALys-TTT
GCCCGGAUAGCUCAGUCGGUAGAUCAU	0.38	3.92	0.0969388	tRNALys-TTT
GCUUCUAUAGUGUAGUGGUUAUCACGUUC	0.38	3.92	0.0969388	tRNAVal-CAC
GGUUAGGAUUCGGCGCUC	2.25	23.29	0.096608	tRNAGlu-CTC,tRNA-derived_pseudogene
GGCUCGUUGGUCUAGGGGUAUGAUUCUC	72.91	761.85	0.0957013	tRNAPro-TGG,tRNAPro-AGG,tRNAPro-CGG
GGCUCAUUGGUCUAGGGGUAUGAUUCUC	0.75	7.84	0.0956633	tRNAPro-TGG,tRNAPro-AGG,tRNAPro-CGG
UAUCCCAUCCUCGUCGCCA	0.56	5.88	0.0952381	tRNASer-GCT
GUAGUCGUGGCCGAGU	3.57	37.5	0.0952	tRNASer-AGA,tRNASer-TGA
CACGUCGGGGUCACCA	2.07	22.06	0.093835	tRNATrp-CCA
UCGGUAGAGCAUGGGA	1.5	16.18	0.092707	tRNALys-CTT
CCGGCUAGCUCAGUCGGUAGAGCAUGA	1.69	18.38	0.0919478	tRNALys-CTT
CCAGGGUUCAGGUCCCUGUUCGGGCGCCA	4.7	51.23	0.0917431	tRNALys-TTT
GUGGGUUCGGGCCCCACGUUGGGCGCCA	3.19	34.81	0.0916403	tRNALys-CTT
UAGUGGUUAGGAUUCGGCGCUCU	0.56	6.13	0.091354	tRNAGlu-CTC,tRNA-derived_pseudogene
UCUGGACUCUGAAUCCAGCGAUCCGAGUU	0.56	6.13	0.091354	tRNAGln-CTG
UGGGUGGUUCAGUGGUA	0.56	6.13	0.091354	tRNAGly-GCC
UCAGUCGGUAGAGCAUCAG	6.76	74.03	0.0913143	tRNALys-TTT
AGCAGAGUGGCGCAGCGGAAGCGUGCU	0.94	10.3	0.0912621	tRNAMet-CAT
AAUCGGGCGGAAACACCA	0.38	4.17	0.0911271	tRNAVal-AAC,tRNAVal-CAC,tRNA-derived_pseudogene
AGCGUGGCCGAGCGGU	0.38	4.17	0.0911271	tRNALeu-AAG,tRNALeu-TAG
AGUGGUUAGGAUUCGGCGU	0.38	4.17	0.0911271	tRNAGlu-CTC,tRNA-derived_pseudogene
CGGAAGCGUGCUGGGCUC	0.38	4.17	0.0911271	tRNAThr-CGT,tRNAMet-CAT
GAGGGUUCGGGUCCCUUCGUGGUCGCCA	0.38	4.17	0.0911271	tRNAArg-CCG,tRNAArg-TCG
GGGGGUGUAGCUCAGUGGUAGAGCAC	0.38	4.17	0.0911271	tRNAAla-TGC
GUAGUCGUGGCCGAGUGGA	0.38	4.17	0.0911271	tRNASer-AGA,tRNASer-TGA
ACCCCACUCCUGGUACCA	0.75	8.33	0.090036	tRNALeu-TAA
CGGAUCAGAAGAUUGAGGGU	0.75	8.33	0.090036	tRNAArg-TCG,tRNAArg-CCG
CAGGGUUCAAGUCCCUGUUCGGGCGCCA	2.25	25	0.09	tRNALys-TTT
GUGGGUUCGAGCCCCACGUUGGGCGCCA	1.5	16.67	0.089982	tRNALys-CTT
GGCUCUUUGGUCUAGGGGUAUGAUUCUC	7.89	88.49	0.0891626	tRNAPro-AGG,tRNAPro-CGG,tRNAPro-TGG
UCCAGGGUUCAGGUCCCUGUUCGGGCGCCA	4.13	46.33	0.0891431	tRNALys-TTT
CCUAAGCCAGGGAUUGUGGGU	1.13	12.75	0.0886275	tRNAArg-CCT
UGGGUUCGAGCCCCACGUUGGGCGCCA	1.13	12.75	0.0886275	tRNALys-CTT
AAACCGGGCGGAAACACCA	1.88	21.33	0.0881388	tRNAVal-CAC,tRNAVal-AAC,tRNA-derived_pseudogene
CCUCCGGAGCUGGGGAUUGUGGGUU	0.56	6.37	0.0879121	tRNAArg-CCG
GCUUCUCUAGUGUAGUGGUUAUCACGUUC	0.75	8.58	0.0874126	tRNAVal-CAC
GUUUCCCGGGCGGCGCACCA	0.75	8.58	0.0874126	tRNAGly-CCC
GCUCAGUCGGUAGAGCAUCAGACUUUU	1.13	12.99	0.08699	tRNALys-TTT
AGCUGGUAGAGCGGAGGACUG	0.38	4.41	0.0861678	tRNATyr-GTA
CGUAUGGAGGCGUGGGU	0.38	4.41	0.0861678	tRNALeu-CAA
GCUCAGUCGGUAGAGCAUGAGACU	0.38	4.41	0.0861678	tRNALys-CTT
UAGCUCAGUCGGUAGAGCAUGA	0.38	4.41	0.0861678	tRNALys-CTT
UCCUCUUUAGUAUAGUGGUGAGUAUCCCC	0.38	4.41	0.0861678	tRNAAsp-GTC
UGGUAGAGCGGAGGACUG	0.38	4.41	0.0861678	tRNATyr-GTA
UAGUGGUUAGGAUUCGGCG	110.68	1285.44	0.0861028	tRNAGlu-CTC,tRNA-derived_pseudogene
GGCUCGUUAGUCUAGGGGUAUGAUUCUC	4.51	52.46	0.0859703	tRNAPro-CGG,tRNAPro-TGG,tRNAPro-AGG
CGGGUUCGACUCCCGGUGUGGGAACCA	3.19	37.5	0.0850667	tRNAGlu-TTC
AGUGGUAGAGCAUUUGACUGCAG	0.75	8.82	0.085034	tRNACys-GCA
CAGGAUGGCCGAGCGGUCUAAGGC	0.75	8.82	0.085034	tRNALeu-CAG
GUCCGGAUAGCUCAGUCGGUAGAGCAU	0.75	8.82	0.085034	tRNALys-TTT
UUCGACUCCCGGUGUGGGAACCA	0.75	8.82	0.085034	tRNAGlu-TTC
AGUCGGUAGAGCAUGAGACUCU	0.56	6.62	0.0845921	tRNALys-CTT
CGUUUCCCGGGCGGCGCACCA	0.56	6.62	0.0845921	tRNAGly-CCC
CCAGGGUUCAUGUCCCUGUUCGGGCGCCA	2.07	24.51	0.0844553	tRNALys-TTT
CAGUCGGUAGAGCAUGGG	2.82	33.58	0.0839786	tRNALys-CTT
CCGGCUAGCUCAGUCGGUAGAGCAUGAGA	1.13	13.48	0.0838279	tRNALys-CTT
GCCCGGCUAGCUCAGUCGGUAGAGCAUUAG	0.94	11.28	0.0833333	tRNALys-CTT
GUGGUUCGGGCCCACCCAGGGACGCCA	3.01	36.28	0.0829658	tRNAAsn-GTT
AGGAUGGCCGAGCGGUCUAAGGC	1.32	15.93	0.0828625	tRNALeu-CAG
AUCCGGCUCGGAGGACCA	0.75	9.07	0.0826902	tRNATyr-GTA
GUGGCUAGGAUUCGGCGCUUUCA	0.75	9.07	0.0826902	tRNAGlu-TTC,tRNA-derived_pseudogene
UCCCACCUUCGUCGCCA	0.75	9.07	0.0826902	tRNASer-GCT
GCCCGGCUAGCUCAGUCGGUAGAUCAUGA	0.56	6.86	0.0816327	tRNALys-CTT
AGGUGGUAGAGCAUUUGACUGCAG	0.38	4.66	0.0815451	tRNACys-GCA
AGUCGGCUAGAGCUUGGUGC	0.38	4.66	0.0815451	tRNAIle-AAT
AGUCGGUAGAGCAUCA	0.38	4.66	0.0815451	tRNALys-TTT
AUGGAUAAGGCAUUGGC	0.38	4.66	0.0815451	tRNAArg-CCT
GCAUUGGUGGUUCAGUGGUAGAAUUCUCAA	0.38	4.66	0.0815451	tRNAGly-GCC,tRNAGly-CCC
GCAUUUGUGGUUCAGUGGUAGAAUUCUC	0.38	4.66	0.0815451	tRNAGly-GCC,tRNAGly-CCC
GUGGUAGAGCAUUUGACUGC	0.38	4.66	0.0815451	tRNACys-GCA
UAGCUCAGUCGGUAGAGCAUCA	0.38	4.66	0.0815451	tRNALys-TTT
UCCAGGGUUCAAGUCCCUGUUCGGGCGCCA	0.75	9.31	0.0805585	tRNALys-TTT
GGAACCGGGCGGAAACACCA	0.56	7.11	0.0787623	tRNAVal-CAC,tRNAVal-AAC
CAGUCGGUAGAGCAUGGGA	3.76	47.8	0.0786611	tRNALys-CTT
UGGGUUCGGAUCCCAUCCUCGUCGCCA	0.75	9.56	0.0784519	tRNASer-GCT
UCAAGUCACGUCGGGGUCACCA	1.13	14.46	0.0781466	tRNATrp-CCA
ACCGCCGCGGCCCGGGUUCGA	0.19	2.45	0.077551	tRNAGlu-TTC,tRNAGlu-CTC
AGGUGGUAGAGCAUUUGACUGC	0.19	2.45	0.077551	tRNACys-GCA
AGUCGGCUAGAGCUUGGU	0.19	2.45	0.077551	tRNAIle-AAT
CAGAUCACGUCGGGGUCACCA	0.19	2.45	0.077551	tRNATrp-CCA
CAGUCGGUAGAGCAUGGGACA	0.19	2.45	0.077551	tRNALys-CTT
CCUCGGUUCGUAUCCGAGUCACGGCACCA	0.19	2.45	0.077551	tRNAHis-GTG
CGGCUGUUAACCGAAAGGUUGGUUGU	0.19	2.45	0.077551	tRNAAsn-GTT
CGGGUUCGUUUCCCGGCCAAUGCACCA	0.19	2.45	0.077551	tRNAGly-GCC
CUCCAGAUCAGAAGGCUGCGUGU	0.19	2.45	0.077551	tRNATrp-CCA
CUGGGCGGAAACACCA	0.19	2.45	0.077551	tRNAVal-CAC
GAAUCCUGCCGACUACGCCA	0.19	2.45	0.077551	tRNASer-AGA,tRNASer-TGA
GAUCCCCGGCAUCUCCACCA	0.19	2.45	0.077551	tRNAAla-CGC,tRNAAla-TGC
GCAUGGGUGGUUCAGUGGAA	0.19	2.45	0.077551	tRNAGly-GCC
GCCGGCUAGCUCAGUCGGUAGAGCAUGGG	0.19	2.45	0.077551	tRNALys-CTT
GCUCGGAUAGCUCAGUCGGUAGAGCAUCAG	0.19	2.45	0.077551	tRNALys-TTT
GGAUCCCAUCCUCGUCGCCA	0.19	2.45	0.077551	tRNASer-GCT
GGCUCGUUCGUCUAGGGGU	0.19	2.45	0.077551	tRNAPro-AGG,tRNAPro-CGG,tRNAPro-TGG
GGCUCGUUGGUCUAGGGGUAUGAUUU	0.19	2.45	0.077551	tRNAPro-AGG,tRNAPro-CGG,tRNAPro-TGG
GGGGGUAUAGCUCAGUGGGUAGAGCAUUUG	0.19	2.45	0.077551	tRNACys-GCA
GUGGUUCGAUCCCACCCAGGGACGCCA	0.19	2.45	0.077551	tRNAAsn-GTT
UAAUGGAUAAGGCACUG	0.19	2.45	0.077551	tRNAArg-CCT
UAGCUCAGUCGGUAGAGCAUC	0.19	2.45	0.077551	tRNALys-TTT
UCCCGGCAUCUCCACCA	0.19	2.45	0.077551	tRNAAla-CGC,tRNAAla-TGC
UCGUUGGUCUAGGGGUAU	0.19	2.45	0.077551	tRNAPro-CGG,tRNAPro-TGG,tRNAPro-AGG
UGGAAGCGUGCUGGGCCC	0.19	2.45	0.077551	tRNAMet-CAT,tRNAThr-CGT
UGGGUUCGAAUCCCACCUUCGUCGCCA	0.19	2.45	0.077551	tRNASer-GCT
UGUCACGUCGGGGUCACCA	0.19	2.45	0.077551	tRNATrp-CCA
GGCUCGUUGGUCUAGGGGUAUGAUUCUCA	2.07	26.72	0.0774701	tRNAPro-AGG,tRNAPro-TGG,tRNAPro-CGG
UGGGUUCGAAUCCCAUCCUCGUCGCCA	2.07	26.72	0.0774701	tRNASer-GCT
AGUCGGCUAGAGCUUGGUG	7.14	92.17	0.0774656	tRNAIle-AAT
GCAUUGGUGGUUCAGUGGUAGAAUUCUC	6.39	82.61	0.0773514	tRNAGly-CCC,tRNAGly-GCC
GCCCGGCUAACUCAGUCGGUAGAGCAUG	1.32	17.16	0.0769231	tRNALys-CTT
UAACCGGGCGGAAACACCA	1.13	14.71	0.0768185	tRNAVal-AAC,tRNAVal-CAC,tRNA-derived_pseudogene
GCCUGGGUAGCUCAGUCGGUAGAGCAUC	1.5	19.61	0.0764916	tRNALys-TTT
CGGGGUUCGAUUCCCCGACGGGGAGCCA	0.75	9.81	0.0764526	tRNAAsp-GTC
GGUCCCAUGGUGUAAUGGU	0.75	9.81	0.0764526	tRNAGln-TTG
GCCCGGAUAGCUCAGUCGGUAGAGCAU	111.8	1467.07	0.0762063	tRNALys-TTT
CGGGUUCGUUUCCCGGUCAGGGAACCA	1.88	24.76	0.0759289	tRNAGlu-CTC,tRNAGlu-TTC,tRNA-derived_pseudogene
UCACGUCGGGGUCACCA	3.19	42.16	0.0756641	tRNATrp-CCA
CAGGUCCCUGUUCGGGCGCCA	1.13	14.95	0.0755853	tRNALys-TTT
GGCUCGUUCGUCUAGGGGUAUGAUUCUC	9.58	127.47	0.0751549	tRNAPro-CGG,tRNAPro-TGG,tRNAPro-AGG
GUCAGGAUGGCCGAGCGGUCUAAGGCU	1.69	22.55	0.0749446	tRNALeu-CAG
GGGGGUGUAGCUCAGUGG	2.82	37.75	0.074702	tRNACys-GCA,tRNAAla-TGC,tRNAAla-AGC,tRNAAla-CGC,tRNAVal-AAC
AAUCACGUCGGGGUCACCA	0.38	5.15	0.0737864	tRNATrp-CCA
AGCUGGUAGAGCGGAGGA	0.38	5.15	0.0737864	tRNATyr-GTA
CCCCGUACGGGCCACCA	0.38	5.15	0.0737864	tRNAIle-AAT
GCUCAGUCGGUAGAGCAUCAGA	0.38	5.15	0.0737864	tRNALys-TTT
GGGGAAUUAGCUCAAGUGGUAGAGC	0.38	5.15	0.0737864	tRNAAla-AGC
GGGGGUAUAGCUCAGGGGUAGAGCAUUUGA	0.38	5.15	0.0737864	tRNACys-GCA
UAGUAGUUAGGAUUCGGCG	0.38	5.15	0.0737864	tRNAGlu-CTC,tRNA-derived_pseudogene
UGGUGGUCUAGUGGUUAGGAU	0.38	5.15	0.0737864	tRNAGlu-CTC,tRNA-derived_pseudogene
GACCCAGUUGCCUAAUGGAUAAGGCAUCA	0.56	7.6	0.0736842	tRNAArg-CCG
GCUUCUGUAGUGUAGUGGUUAUCACAUUC	0.56	7.6	0.0736842	tRNA-derived_pseudogene,tRNAVal-CAC
CGGCUAGCUCAGUCGGUAGAGCAUGAG	1.13	15.44	0.0731865	tRNALys-CTT
UCAGUCGGUAGAGCAUCA	2.63	36.03	0.0729947	tRNALys-TTT
UCCCAUCCUCGUCGCCA	2.25	30.89	0.0728391	tRNASer-GCT
GGCUCGUUUGUCUAGGGGUAUGAUUCUC	1.13	15.69	0.0720204	tRNAPro-CGG,tRNAPro-TGG,tRNAPro-AGG
UAGAAUUCUCGCCUGCCAC	0.75	10.54	0.0711575	tRNAGly-GCC
UUCCCGGCCAACGCACCA	0.75	10.54	0.0711575	tRNAGly-TCC
GCCCGAAUAGCUCAGUCGGUAGAGCAU	2.25	31.87	0.0705993	tRNALys-TTT
AAUGGAUAAGGCGUCUG	0.38	5.39	0.0705009	tRNAArg-TCG,tRNAArg-CCG
GCUCGGCUAGCUCAGUCGGUAGAGCAUG	0.38	5.39	0.0705009	tRNALys-CTT
GGGGGUAUAGCUCAGUGGUAGAGCGGG	0.38	5.39	0.0705009	tRNAAla-AGC
UAGUGGUUAGGAUUCGGCGCUCA	0.38	5.39	0.0705009	tRNAGlu-CTC,tRNA-derived_pseudogene
ACUCCAGAUCAGAAGGU	0.19	2.7	0.0703704	tRNATrp-CCA,tRNA-derived_pseudogene
AGCUCAGUCGGUAGAGCAUCAGACUUU	0.19	2.7	0.0703704	tRNALys-TTT
AGGAUGGCCGAGCGGUCUAAGGCGCUG	0.19	2.7	0.0703704	tRNALeu-CAG
CAAUGGAUAACGCGUCUGACUACGGAU	0.19	2.7	0.0703704	tRNAArg-ACG,tRNA-derived_pseudogene
CGGUAGAGCAUGAGACUC	0.19	2.7	0.0703704	tRNALys-CTT
GCCCGGCUAGCUCAGUCGGUAGAGCAUAAG	0.19	2.7	0.0703704	tRNALys-CTT
GCCUGGGUAGCUCAGUCGGA	0.19	2.7	0.0703704	tRNALys-TTT,tRNA-derived_pseudogene
GGCUCCUUGGUCUAGGGGUAUGAUUCU	0.19	2.7	0.0703704	tRNAPro-CGG,tRNAPro-TGG,tRNAPro-AGG
GGGGGUAUAGCUCAGCGGUAGAGCACGU	0.19	2.7	0.0703704	tRNAAla-AGC
GGGGGUGUAGCUCAGUGGUAUAGCGU	0.19	2.7	0.0703704	tRNAVal-AAC
GGGUAUAGCUCAGCGGUAG	0.19	2.7	0.0703704	tRNAAla-AGC
GGUGGUUCGUGCCCACCCAGGGACGCCA	0.19	2.7	0.0703704	tRNAAsn-GTT
GUAGUCGUGGCCGAGUGGUUAAGGCUAU	0.19	2.7	0.0703704	tRNASer-TGA,tRNASer-AGA
GUCAGAAUGGCCGAGUGGU	0.19	2.7	0.0703704	tRNALeu-CAA,tRNA-derived_pseudogene
GUCAGGAUGGCCGAGCGGUCUU	0.19	2.7	0.0703704	tRNALeu-CAG
GUCCGGAUAGCUCAGUCGGUAGAGCA	0.19	2.7	0.0703704	tRNALys-TTT
GUGGGUUCGGAUCCCAUCCUCGUCGCCA	0.19	2.7	0.0703704	tRNASer-GCT
UCGUAUCACGUCGGGGUCACCA	0.19	2.7	0.0703704	tRNATrp-CCA
UGCCCGCAUCCUCCACCA	0.19	2.7	0.0703704	tRNAAla-AGC
GCGCCGCUGGUGUAGUGGUAUCAUGCA	3.01	42.9	0.0701632	tRNAGly-CCC
CAGUCGGUAGAGCAUCAG	17.29	247.09	0.0699745	tRNALys-TTT
GCCCGGAUAGCUCAGUCGGUAGAGCAUA	0.75	10.79	0.0695088	tRNALys-TTT
CUGGACUCUGAAUCCAGCGAUCCGAGU	1.32	19.12	0.0690377	tRNAGln-CTG
GCCCGGCUAGCUCAGUCGGUAGAGCAUG	68.4	991.78	0.0689669	tRNALys-CTT
AUAGCUCAGUCGGUAGAGCAUCA	0.94	13.73	0.0684632	tRNALys-TTT
GCCUGGAUAGCUCAGUCGGUAGAGCAUCAG	2.07	30.4	0.0680921	tRNALys-TTT
CAGUCGGCUAGAGCUUGGUG	0.75	11.03	0.0679964	tRNAIle-AAT
GGGGGUAUAGCUCAGGUGGUAGAGCAUU	0.75	11.03	0.0679964	tRNACys-GCA
UAGGAUUCGGCGCUUUCA	0.75	11.03	0.0679964	tRNA-derived_pseudogene,tRNAGlu-TTC
CGGAUAGCUCAGUCGGUAGAGCAUCA	1.13	16.67	0.0677864	tRNALys-TTT
AAUGGAGGCGUGGGUU	0.38	5.64	0.0673759	tRNALeu-CAA
CGGAUAGCUCAGUCGGUAGAGCAUC	0.38	5.64	0.0673759	tRNALys-TTT
UCGAUCCCCGGCACCUCCACCA	0.38	5.64	0.0673759	tRNAAla-TGC
AGGGUUCAGGUCCCUGUUCGGGCGCCA	6.39	94.86	0.0673624	tRNALys-TTT
CGGAUGGAGGCGUGGGU	5.64	83.83	0.067279	tRNALeu-CAA
GGGGGUAUAGCUCAGUGGGUAGAGCAUUU	0.75	11.28	0.0664894	tRNACys-GCA
CAGGGUUCAUGUCCCUGUUCGGGCGCCA	3.01	45.35	0.0663727	tRNALys-TTT
ACUCCAGAUCAGAAGGUUGCGUG	2.63	39.71	0.0662302	tRNATrp-CCA
AUCACGUCGGGGUCACCA	5.64	86.53	0.0651797	tRNATrp-CCA
GCCCGGAUAGCUCAGUCGGCAGAG	0.38	5.88	0.0646259	tRNALys-TTT
AACUGGGCGGAAACACCA	0.19	2.94	0.0646259	tRNAVal-CAC
AGUUGGGAGAGCUUUAGACUGA	0.19	2.94	0.0646259	tRNAPhe-GAA
AUAGCUCAGUCGGUAGAGCA	0.19	2.94	0.0646259	tRNALys-TTT
CAGUCGGUAGAGCAUCAGACUU	0.19	2.94	0.0646259	tRNALys-TTT
CCCGUACGGGCCACCA	0.19	2.94	0.0646259	tRNAIle-AAT
CGGGAGACCGGGGUUCGAUUCCCCGACG	0.19	2.94	0.0646259	tRNAAsp-GTC
CGUAUCCUGCCGACUACGCCA	0.19	2.94	0.0646259	tRNASer-AGA,tRNASer-TGA
GCCCGGCUAGCUCAGUCGCUAGAGCAUGGG	0.19	2.94	0.0646259	tRNALys-CTT
GCCUGGAUAGCUCAGUCGGUAGAU	0.19	2.94	0.0646259	tRNALys-TTT
GCGCCGCUGGUGUAGUGGUAUCAUGCAAGA	0.19	2.94	0.0646259	tRNAGly-CCC
GCGUUUGUGGUAUAGUGGUAAGCAUAGCUG	0.19	2.94	0.0646259	tRNAGly-TCC
GGCUAGCUCAGUCGGUAGAGCAUGG	0.19	2.94	0.0646259	tRNALys-CTT
GGCUCGUUGGUCUAGG	0.19	2.94	0.0646259	tRNAPro-TGG,tRNAPro-AGG,tRNAPro-CGG
GGGGAUAUAGCUCAGGGGUAGAGCAU	0.19	2.94	0.0646259	tRNACys-GCA
UAGCUCAGUCGGUAGAGCA	0.19	2.94	0.0646259	tRNALys-CTT,tRNALys-TTT
UAUCACGUCGGGGUCACCA	0.19	2.94	0.0646259	tRNATrp-CCA
UCACGUCGGGGUCACC	0.19	2.94	0.0646259	tRNATrp-CCA
UCCCGGAUAGCUCAGUCGGUAGAG	0.19	2.94	0.0646259	tRNALys-TTT
UCCCUGUGGUCUAGUGGCU	0.19	2.94	0.0646259	tRNAGlu-TTC
UGGGUUCGUAUCCCAUCCUCGUCGCC	0.19	2.94	0.0646259	tRNASer-GCT
UGGUCUAGUGGUUAGGAUUCGGCGC	0.19	2.94	0.0646259	tRNAGlu-CTC
UUCGACUCCCGGUAUGGGAACCA	0.19	2.94	0.0646259	tRNAGlu-TTC
UUCGUGCCCCACGUUGGGCGCCA	0.19	2.94	0.0646259	tRNALys-CTT
UUUGCUUGUAUGAGGCCUCGGGU	0.19	2.94	0.0646259	tRNAAla-TGC
GCGGAAGCGUGCUGGGCCCA	1.13	17.65	0.0640227	tRNAMet-CAT
GUCGGUAGAGCAUGAGAC	4.7	73.54	0.0639108	tRNALys-CTT
GGGGGUAUAGCUCAGUGGGUAGAGCAUU	3.19	50.01	0.0637872	tRNACys-GCA
ACUCCAGAUCAGAAGGUGGCGUG	2.25	35.3	0.0637394	tRNATrp-CCA
GGCUCGUUGGUCUAGGGGGAUGAUUCUC	0.75	11.77	0.0637213	tRNAPro-TGG,tRNAPro-AGG,tRNAPro-CGG
GCCCGGCUAACUCAGUCGGUAGAGCAUGG	0.56	8.82	0.0634921	tRNALys-CTT
GGCUCGUUGGUCUAGGG	0.56	8.82	0.0634921	tRNAPro-CGG,tRNAPro-TGG,tRNAPro-AGG
GUUUCCGUAGUGUAGCGGUUAUCACAUUC	0.56	8.82	0.0634921	tRNAVal-CAC
CCCGGGUUUCGGCACCA	3.01	47.55	0.0633018	tRNAPhe-GAA
UCAGGUCACGUCGGGGUCACCA	6.2	98.3	0.0630722	tRNATrp-CCA
GGGGGUAUAGCUCAGGGGUAGAGCAUU	4.89	78.19	0.06254	tRNACys-GCA
CAGGGUUCAGGUCCCUGUUCGGGCGCCA	8.27	132.86	0.062246	tRNALys-TTT
ACUCAAGUUCUGGUCUC	0.38	6.13	0.0619902	tRNALeu-CAA
AGUGGUAGAAUUCUCGC	0.38	6.13	0.0619902	tRNA-derived_pseudogene,tRNAGly-CCC,tRNAGly-GCC,tRNAVal-CAC
GCCCGGAUAGCUCAGUUGGUAGAG	0.38	6.13	0.0619902	tRNALys-TTT,tRNA-derived_pseudogene
GCCUGGCUAGCUCAGUCGGUAGAGCAUG	0.38	6.13	0.0619902	tRNALys-CTT
GGCUCCUUGGUCUAGGGGUAUGAUUCUC	0.94	15.2	0.0618421	tRNAPro-TGG,tRNAPro-AGG,tRNAPro-CGG
CUCCGGAGCUGGGGAUUGUGGGU	0.56	9.07	0.061742	tRNAArg-CCG
UUCGUAACCGGGCGGAAACACCA	0.56	9.07	0.061742	tRNAVal-CAC,tRNAVal-AAC
AGCAGAGUAGCGCAGCGGAAGCGUGCUGG	1.69	27.45	0.0615665	tRNAMet-CAT
CCGGGCGGAAACACCA	10.33	168.65	0.0612511	tRNAVal-CAC,tRNAVal-AAC,tRNA-derived_pseudogene
GGGGGUAUAGCUCAGUGGUAGAGC	2.07	33.83	0.0611883	tRNACys-GCA,tRNAAla-AGC
AGGUCCCUGUUCGGGCGCCA	10.9	180.66	0.0603343	tRNALys-TTT
UGGUGGUUCGUGCCCACCCAGGGACGCCA	0.56	9.31	0.0601504	tRNAAsn-GTT
CCCACCCAGGGACGCCA	0.38	6.37	0.0596546	tRNAAsn-GTT
GCCCGGAUAGCUCAGUCGGUAGAGCCU	0.38	6.37	0.0596546	tRNALys-TTT
GGGGAUGUAGCUCAGUGGUAGAGCGCGCG	0.38	6.37	0.0596546	tRNAAla-CGC
UCUAGUGGUUAGGAUUCGGCGCUC	0.38	6.37	0.0596546	tRNA-derived_pseudogene,tRNAGlu-CTC
AGUCGGUAGAGCAUCAGACUU	0.19	3.19	0.0595611	tRNALys-TTT
AUAGCUCAGUCGGUAGAGCAUCAGACUUU	0.19	3.19	0.0595611	tRNALys-TTT
AUGGAUAAGGCAUUGGCGUC	0.19	3.19	0.0595611	tRNAArg-CCT
AUGGAUAGCGCAUUGGAUUU	0.19	3.19	0.0595611	tRNAArg-TCT,tRNA-derived_pseudogene
CCGGAUAGCUCAGUCGGUAGAGCAUC	0.19	3.19	0.0595611	tRNALys-TTT
CGUUUCCCGGCCAAUGCACCA	0.19	3.19	0.0595611	tRNAGly-GCC
CUAGCGGUUAGGAUUCCUGGU	0.19	3.19	0.0595611	tRNAGlu-TTC,tRNA-derived_pseudogene
GCCCGGAUAGCUCAGUCGGUAGAGCAUUA	0.19	3.19	0.0595611	tRNALys-TTT
GCCCGGAUAGCUCAGUCGGUAUAGCAU	0.19	3.19	0.0595611	tRNALys-TTT
GCCCGGCUAGCUCAGUCGGUAGAGCUUGGG	0.19	3.19	0.0595611	tRNALys-CTT
GCCCGGCUAGUUCAGUCGGUAGAGCAUGGG	0.19	3.19	0.0595611	tRNALys-CTT
GCCUGGAUAGCUCAGUCGGUAGAGU	0.19	3.19	0.0595611	tRNALys-TTT
GGGGGUAUAGCUCAGUGGCAGAGCAUU	0.19	3.19	0.0595611	tRNACys-GCA
GGGGGUGUAGAUCAGUGGUAGAGCGU	0.19	3.19	0.0595611	tRNAVal-AAC,tRNAAla-CGC
GGGGUUCAAUUCCCCGACGGGGAGCCA	0.19	3.19	0.0595611	tRNAAsp-GTC
UCAAAACCAGGCGGAAACACCA	0.19	3.19	0.0595611	tRNAVal-AAC
UGGAUAGCGCAUUGGAUUU	0.19	3.19	0.0595611	tRNAArg-TCT,tRNA-derived_pseudogene
UGGGAUGCGAGAGGUCCC	0.19	3.19	0.0595611	tRNAPro-AGG
UGGUAGAGCAUUUGACUGCAGAUCA	0.19	3.19	0.0595611	tRNACys-GCA
UUCGUAUCCGAGUCACGGCACCA	0.19	3.19	0.0595611	tRNAHis-GTG
GGAUAGCUCAGUCGGUAGAGCAU	1.13	19.12	0.0591004	tRNALys-TTT
UCGAAUCACGUCGGGGUCACCA	0.75	12.75	0.0588235	tRNATrp-CCA
GGUUCCAUGGUGUAAUGGU	1.69	28.92	0.0584371	tRNAGln-CTG,tRNA-derived_pseudogene
GCCCGCAUAGCUCAGUCGGUAGAGCAU	1.13	19.36	0.0583678	tRNALys-TTT
UCCCCGGCACCUCCACCA	2.44	42.16	0.0578748	tRNAAla-AGC,tRNAAla-TGC
CCAGGGUUCAAGUCCCUGUUCGGGCGCCA	0.75	12.99	0.0577367	tRNALys-TTT
GGCUCCGUUGCGCAAUGGAUAGCGCAUUG	0.75	12.99	0.0577367	tRNAArg-TCT
UUGGUGGUUCGGGCCCACCCAGGGACGCCA	0.75	12.99	0.0577367	tRNAAsn-GTT
GGCUCGUUGGUCUAGGGGUAUUAUUCUC	0.38	6.62	0.0574018	tRNAPro-AGG,tRNAPro-TGG,tRNAPro-CGG
UCGGGUGCGAGAGGUCCCGG	0.38	6.62	0.0574018	tRNAPro-CGG
UGGUGGUUCGGGCCCACCCAGGGACGCCA	0.38	6.62	0.0574018	tRNAAsn-GTT
GGGGUGUAGCUCAGUGGUAGAGCGUG	2.63	46.08	0.0570747	tRNAVal-AAC,tRNAAla-AGC,tRNAAla-CGC
CAGUCGGUAGAGCAUCAGAA	1.13	19.86	0.0568983	tRNALys-TTT
GUCGGUAGAGCAUGGGA	1.13	19.86	0.0568983	tRNALys-CTT
CUCAGUCGGUAGAGCAUGAG	1.69	29.91	0.0565028	tRNALys-CTT
GGGGGUGUAGCUCAGUGGUAGAGCAUU	4.7	84.81	0.055418	tRNACys-GCA
CUCGGUUCGAAUCCGAGUCACGGCACCA	0.38	6.86	0.0553936	tRNAHis-GTG
GCCCGGCUAGCGCAGUCGGUAGAGCAUGGG	0.38	6.86	0.0553936	tRNALys-CTT
GGAUAGCUCAGUCGGUAGAGCAUC	0.38	6.86	0.0553936	tRNALys-TTT
UGGUAGAAUUCUCGCCUGCC	0.38	6.86	0.0553936	tRNAGly-GCC
UUCGUUUCCCGGGCGGCGCACCA	0.38	6.86	0.0553936	tRNAGly-CCC
ACCAGGCGGAAACACCA	0.19	3.43	0.0553936	tRNAVal-CAC,tRNAVal-AAC
AUCCUGCCGACUACGCUA	0.19	3.43	0.0553936	tRNASer-AGA,tRNASer-TGA
CCCCGGAUAGCUCAGUCGGUAGAG	0.19	3.43	0.0553936	tRNALys-TTT
CCGAGUCACGGCACCA	0.19	3.43	0.0553936	tRNAHis-GTG
CGAAUCACGUCGGGGUCACCA	0.19	3.43	0.0553936	tRNATrp-CCA
CGGGUUCGUUUCCCGGGCGGCGCACCA	0.19	3.43	0.0553936	tRNAGly-CCC
CUGGUUCGAAUCCGGCUCGAAGGACCA	0.19	3.43	0.0553936	tRNATyr-GTA
GCCCCGCUAGCUCAGUCGGUAGAGCAUGGG	0.19	3.43	0.0553936	tRNALys-CTT
GCUGUAGUGUAGUGGUUAUCACGUUC	0.19	3.43	0.0553936	tRNAVal-CAC
GCUUCUGUAGUGUAGUGUUUAUCACGUUC	0.19	3.43	0.0553936	tRNAVal-CAC
GGCUCGUUUGUCUAGGGGUAUGAUUCU	0.19	3.43	0.0553936	tRNAPro-AGG,tRNAPro-TGG,tRNAPro-CGG
GGGGAUGUAGCUCAGUGGUAGAGCACG	0.19	3.43	0.0553936	tRNAAla-CGC
GGGGGUGCAGCUCAGUGGUAGAGCGU	0.19	3.43	0.0553936	tRNAVal-AAC
GGUUCGAAACCGGGCGGAAACACCA	0.19	3.43	0.0553936	tRNAVal-CAC,tRNAVal-AAC
GGUUCGUAACCGGGCGGAAACACCA	0.19	3.43	0.0553936	tRNAVal-CAC,tRNAVal-AAC
GUCAGGAUGGCCGAGCGGUCUAAGGCUCU	0.19	3.43	0.0553936	tRNALeu-CAG
GUCGGUAGAGCAUCAGA	0.19	3.43	0.0553936	tRNALys-TTT
GUUUCCGUAGUGUAGUGGUUAUCACGUUU	0.19	3.43	0.0553936	tRNAVal-AAC,tRNAVal-CAC
UAGUGGUUAUGAUUCGGCG	0.19	3.43	0.0553936	tRNAGlu-CTC,tRNA-derived_pseudogene
UCGAAUCCUGCUCACAGCGCCA	0.19	3.43	0.0553936	tRNASer-CGA
UGAAUCCAGCGAUCCGAGUU	0.19	3.43	0.0553936	tRNAGln-CTG,tRNAGln-TTG
UGGCAUCCUAAGCCAGGGAUUGUGGGU	0.19	3.43	0.0553936	tRNAArg-CCT
GGGGGUAUAGCUCAGUGGUAGAGCAUU	7.14	130.16	0.0548556	tRNACys-GCA
AGACUCAAGUUCUGGUC	0.94	17.16	0.0547786	tRNALeu-CAA
CAGUGGUAGAGCAUUUGACUGC	0.75	13.73	0.0546249	tRNACys-GCA
UAGUGGUUAGGAUUCUGCG	0.75	13.73	0.0546249	tRNA-derived_pseudogene,tRNAGlu-CTC
CGGCUGUUAACCGAAAGGUUGGUGGU	3.01	55.4	0.0543321	tRNAAsn-GTT
GGGGGUGUAGCUCAGUGGUAGAGC	15.97	295.62	0.0540221	tRNAAla-AGC,tRNAAla-CGC,tRNAAla-TGC,tRNAVal-AAC,tRNACys-GCA
ACCGGGCAGAAGCACCA	5.07	93.88	0.0540051	tRNAVal-CAC
UCGAAUCCGAGUCACGGCACCA	0.75	13.97	0.0536865	tRNAHis-GTG
ACCGGGAGGAAACACCA	0.38	7.11	0.0534459	tRNAVal-CAC,tRNAVal-AAC,tRNA-derived_pseudogene
GCCCACCCAGGGACGCCA	0.38	7.11	0.0534459	tRNAAsn-GTT
GGCUCGUUCGUCUAGGGGUAUGAUUCUCA	0.38	7.11	0.0534459	tRNAPro-AGG,tRNAPro-CGG,tRNAPro-TGG
GCCCGACUAGCUCAGUCGGUAGAGCAUG	0.94	17.65	0.0532578	tRNALys-CTT
UCAGUCGGUAGAGCAUGGG	0.56	10.54	0.0531309	tRNALys-CTT
UCGGAUCAGAAGAUUGAGGGU	0.56	10.54	0.0531309	tRNAArg-TCG
AGGGUUCAAGUCCCUGUUCGGGCGCCA	2.25	42.65	0.052755	tRNALys-TTT
GUCAGGAUGGCCGAGCGGUCUAAGGCGCU	0.75	14.22	0.0527426	tRNALeu-CAG
CGGGUUCGAUUCCCGGUCAGGGAACCA	1.13	21.57	0.0523876	tRNAGlu-TTC,tRNA-derived_pseudogene,tRNAGlu-CTC
GCCCGGCUAGCUCAGUCGGUAGAGCACGGG	0.56	10.79	0.0518999	tRNALys-CTT
ACCGGGCGGAAACAUCA	0.38	7.35	0.0517007	tRNA-derived_pseudogene,tRNAVal-AAC,tRNAVal-CAC
GCCGCUGGUGUAGUGGUAUCAUGCAA	0.38	7.35	0.0517007	tRNAGly-CCC
GGGGGUAUAGCUCAGCGGUAGAGCUCGUG	0.38	7.35	0.0517007	tRNAAla-AGC
ACCGGGCGGAAACACUA	0.19	3.68	0.0516304	tRNAVal-AAC,tRNAVal-CAC,tRNA-derived_pseudogene
AGUCGGCUAGAGCAUGGUG	0.19	3.68	0.0516304	tRNAIle-AAT
AGUCGGUAGAGCAUGAGU	0.19	3.68	0.0516304	tRNALys-CTT
AGUGGUUAGGAUUCGGCGCUCU	0.19	3.68	0.0516304	tRNAGlu-CTC,tRNA-derived_pseudogene
CGGUUAGGAUUCCUGGU	0.19	3.68	0.0516304	tRNAGlu-TTC,tRNA-derived_pseudogene
CUCUCAUCGCCGCGGCCCGGGU	0.19	3.68	0.0516304	tRNAGlu-CTC
GAUUCCGGCUCGAAGGACCA	0.19	3.68	0.0516304	tRNATyr-GTA
GCCCGAAUAGCUCAGUCGGUAGAGCAUC	0.19	3.68	0.0516304	tRNALys-TTT
GCCCGGCUAGCUCAGUCGGUAGAGCAUAA	0.19	3.68	0.0516304	tRNALys-CTT
GCCCGGCUAGCUCAGUCGGUAGAUCAUGUG	0.19	3.68	0.0516304	tRNALys-CTT
GGAUAGCUCAGUCGGUAGAGCAUCAG	0.19	3.68	0.0516304	tRNALys-TTT
GGGGAUGUAGCUCAGUG	0.19	3.68	0.0516304	tRNAAla-TGC,tRNAAla-CGC,tRNAAla-AGC
UCCCACCGCUGCCACCA	0.19	3.68	0.0516304	tRNALeu-TAG,tRNALeu-AAG
UCUAGCGGUUAGGAUUCCUGGUU	0.19	3.68	0.0516304	tRNAGlu-TTC
CAGUUGGUAGAGCAUCAG	0.75	14.95	0.0501672	tRNALys-TTT,tRNA-derived_pseudogene
CCCGGCACCUCCACCA	0.38	7.6	0.05	tRNAAla-TGC,tRNAAla-AGC
AGCAGAGUGGCGCAGCGGAAGCGUGCUGG	19.54	390.97	0.0499783	tRNAMet-CAT
AUCCCGGACGAGCCCCC	0.56	11.28	0.0496454	tRNAPro-TGG,tRNAPro-CGG,tRNAPro-AGG
CAGUCGGUAGAGCAUGGGAC	0.94	19.12	0.0491632	tRNALys-CTT
GGGGAUGUAGCUCAGUGGUAGAGC	291.25	5932.03	0.0490979	tRNAAla-CGC,tRNAAla-TGC,tRNAAla-AGC
GGGGGUGUAGCUCAGUG	6.39	130.65	0.0489093	tRNAAla-TGC,tRNAAla-AGC,tRNAAla-CGC,tRNAVal-AAC,tRNACys-GCA
CCGGCUAGCUCAGUCGGUAGAGCAUGGG	0.38	7.84	0.0484694	tRNALys-CTT
GGUUAGGAUUCGGCGC	0.38	7.84	0.0484694	tRNAGlu-CTC,tRNA-derived_pseudogene
ACCCCGUACGGGCCACCA	0.19	3.92	0.0484694	tRNAIle-AAT
CCGCCGCGGCCCGGGUUCGA	0.19	3.92	0.0484694	tRNAGlu-TTC,tRNAGlu-CTC
CGGGUUCGUUCCCCGUACGGGCCACCA	0.19	3.92	0.0484694	tRNAIle-AAT
GCCCGGCUAGCUCAGGCGGUAGAGCAUGA	0.19	3.92	0.0484694	tRNALys-CTT
GCCCGGCUAGCUCAGUCGGUAGCGCAUGA	0.19	3.92	0.0484694	tRNALys-CTT
GCUUGGAUAGCUCAGUCGGUAGAGCAUCA	0.19	3.92	0.0484694	tRNALys-TTT
GGCUCCGUCGCGCAAUGGAUAGCGCAUUG	0.19	3.92	0.0484694	tRNAArg-TCT
GGCUCGUUGGUCUAGGGGGAUGAUUCU	0.19	3.92	0.0484694	tRNAPro-AGG,tRNAPro-TGG,tRNAPro-CGG
GUCGGUAGAGCAUCAGAC	0.19	3.92	0.0484694	tRNALys-TTT
GUUUCCGUAGUGUAGCGGUUAU	0.19	3.92	0.0484694	tRNAVal-CAC
UCCUGCCGCGGUCGCCA	0.19	3.92	0.0484694	tRNAArg-TCG
UCGAAUCCCAGUAGAGCCUCCA	0.19	3.92	0.0484694	tRNAThr-TGT
UCGUAUCCCAGCGGGGCCUCCA	0.19	3.92	0.0484694	tRNAThr-CGT,tRNAThr-AGT
UCGUAUCCGAGUCACGGCACCA	0.19	3.92	0.0484694	tRNAHis-GTG
UGGUGUAGUGGUAUCAUGCAA	0.19	3.92	0.0484694	tRNAGly-CCC
UUCGAAUCCGAGUCACGGCACCA	0.19	3.92	0.0484694	tRNAHis-GTG
CCGGCUAGCUCAGUCGGUAGAGCAUGAG	3.38	70.6	0.0478754	tRNALys-CTT
CAGUCGGUAGAGCAUC	0.94	19.86	0.0473313	tRNALys-TTT
GCCCGGCGAGCUCAGUCGGUAGAGCAUGGG	0.38	8.09	0.0469716	tRNALys-CTT
UGGGUGGUUCAGUGGUAGAA	0.56	12.01	0.0466278	tRNAGly-GCC
GCCCGGAUAGCUCAGUCGGUAGAGCAUC	8.64	186.79	0.0462552	tRNALys-TTT
GUGGCUAGGAUUCGGCG	6.2	135.31	0.0458207	tRNAGlu-TTC,tRNA-derived_pseudogene
GCCCGGCUAGCUCAGUCGGUAGAGCAUU	1.88	41.18	0.0456532	tRNALys-CTT
UCAAAUCCCGGACGAGCCCCC	0.38	8.33	0.0456182	tRNAPro-CGG,tRNAPro-TGG,tRNAPro-AGG
UGGAUAAGGCAUUGGCUUCCUAA	0.38	8.33	0.0456182	tRNAArg-CCT
UGGCUAGGAUUCGGCGCUUUCA	0.38	8.33	0.0456182	tRNAGlu-TTC,tRNA-derived_pseudogene
AGCUCAGUCGGUAGAGCAUGG	0.19	4.17	0.0455635	tRNALys-CTT
AUUUCGAUGGCGUGGGUU	0.19	4.17	0.0455635	tRNALeu-TAG
CAGGAUGGCCGAGCGGUCUAAGGCU	0.19	4.17	0.0455635	tRNALeu-CAG
GCCCGGCUAGCUCAUUCGGUAGAGCAUGA	0.19	4.17	0.0455635	tRNALys-CTT
GGGGAUGUAGCUCAGUGGUU	0.19	4.17	0.0455635	tRNAAla-CGC,tRNAAla-AGC,tRNAAla-TGC
UCUAGGGGUAUGAUUCUCGG	0.19	4.17	0.0455635	tRNAPro-TGG
UGGUCUAGUGGUUAGGAUUCGGCGCUC	0.19	4.17	0.0455635	tRNAGlu-CTC
GGCUCCGUGGCGCAAUGGAUAGCGCAUUG	2.82	62.51	0.0451128	tRNAArg-TCT
AGGGUUCAUGUCCCUGUUCGGGCGCCA	3.19	70.84	0.0450311	tRNALys-TTT
AUCCCACUCCUGACACCA	0.75	16.67	0.044991	tRNALeu-CAG
AGCAGAGUCGCGCAGCGGAAGCGUGCUGG	1.88	42.41	0.0443292	tRNAMet-CAT
CCGGCUAGCUCAGUCGGUAGAGCA	0.38	8.58	0.044289	tRNALys-CTT
GGAUGUAGCUCAGUGGUAGAGC	0.38	8.58	0.044289	tRNAAla-TGC,tRNAAla-CGC,tRNAAla-AGC
GUAGUCGUGGCCGAGUGGUUAAGGCAAU	0.38	8.58	0.044289	tRNASer-TGA,tRNASer-AGA
GUUUCCGUAGUGUAGUGGUUAUCACGUUC	10.9	246.35	0.044246	tRNAVal-CAC,tRNAVal-AAC
GCCCGGAUAACUCAGUCGGUAGAGCAU	0.94	21.57	0.043579	tRNALys-TTT
GGGGGUAUAGCUCAGUGGUAGAGCUCGUG	0.94	21.57	0.043579	tRNAAla-AGC
CGGCUAGCUCAGUCGGUAGAGCAUGGG	0.56	12.99	0.0431101	tRNALys-CTT
GCUCAGUCGGUAGAGCAUCAG	0.56	12.99	0.0431101	tRNALys-TTT
GGCUCGUUGGUCUAGUGGUAUGAUUCUC	0.56	12.99	0.0431101	tRNAPro-TGG
CGGCUAGCUCAGUCGGUAG	0.38	8.82	0.0430839	tRNALys-CTT
GCGUUGGUGGUAUAGUGGUGAGCAUAGCUU	0.38	8.82	0.0430839	tRNAGly-TCC
UAGGGGUUAGGAUUCGGCG	0.38	8.82	0.0430839	tRNAGlu-CTC,tRNA-derived_pseudogene
AUCCCAGCGGUGCCUCCA	0.19	4.41	0.0430839	tRNAThr-AGT
AUGGAUAAGGCGUCUG	0.19	4.41	0.0430839	tRNAArg-TCG,tRNAArg-CCG
CCGGGUUCGAUUCCCGGUCAGGGAACCA	0.19	4.41	0.0430839	tRNA-derived_pseudogene,tRNAGlu-CTC,tRNAGlu-TTC
CGAAUCCCAUCCUCGUCGCCA	0.19	4.41	0.0430839	tRNASer-GCT
GCCCGGCUAGCUCAGUCGGUAGAGCAAGGG	0.19	4.41	0.0430839	tRNALys-CTT
GCCCGGCUAGCUCAGUUGGUAGAGCAUGA	0.19	4.41	0.0430839	tRNALys-CTT
GCCCGUCUAGCUCAGUCGGUAGAGCAUGG	0.19	4.41	0.0430839	tRNALys-CTT
GGGUUCAGGUCCCUGUUCGGGCGCCA	0.19	4.41	0.0430839	tRNALys-TTT
UAAGCCAGGGAUUGUGGGU	0.19	4.41	0.0430839	tRNAArg-CCT
UUGGCCUCCUAAGCCAGGGAUUGUGGGU	0.19	4.41	0.0430839	tRNAArg-CCT
CGGAAGCGUGCUGGGCCCA	6.58	153.94	0.0427439	tRNAMet-CAT
GCUCAGUCGGUAGAGCAUGAGAC	0.56	13.24	0.0422961	tRNALys-CTT
GGGGGUGUAGCUCAGUGGUAGAGAGCGUG	3.95	93.64	0.0421828	tRNAAla-AGC,tRNAAla-CGC
ACUGGGCGGAAACACCA	0.38	9.07	0.0418964	tRNAVal-CAC
GGCUCUUUGGUCUAGGGGUAUGAUUCU	0.94	22.55	0.0416851	tRNAPro-TGG,tRNAPro-AGG,tRNAPro-CGG
GGGGGUGUAGCUCAGUGGUAGAGCGCGUU	0.56	13.48	0.041543	tRNAAla-AGC,tRNAAla-CGC
GGGGGCAUAGCUCAGUGGUAGAGCAUU	1.32	32.11	0.0411087	tRNACys-GCA
AUUUCGAUGGCGUGGGU	0.75	18.38	0.0408052	tRNALeu-TAG
GCGUUUGUGGUAUAGUGGUGAGCAUAGCUG	0.56	13.73	0.0407866	tRNAGly-TCC
GGGGGUGUAGCUCAGUGGUAGAGCGCAUG	0.56	13.73	0.0407866	tRNAAla-TGC
GAUCGAAACCAUCCUCUGCUACCA	0.19	4.66	0.0407725	tRNAMet-CAT
GCCCGGAUAGCUCAGUCGGUAGAGCAUGA	0.19	4.66	0.0407725	tRNALys-CTT,tRNALys-TTT
GCCCGGCUAGCUAAGUCGGUAGAGCAUGGG	0.19	4.66	0.0407725	tRNALys-CTT
GCCCGGCUAUCUCAGUCGGUAGAGCAUGA	0.19	4.66	0.0407725	tRNALys-CTT
GGGGGUAUAGCUCAGGUGGUAGAGCAUUU	0.19	4.66	0.0407725	tRNACys-GCA
GGGGGUAUAGCUCAGUGGUAGAGAGCGUG	0.19	4.66	0.0407725	tRNA-derived_pseudogene,tRNAAla-AGC
GUCCGGCUAGCUCAGUCGGUAGAGCAUG	0.19	4.66	0.0407725	tRNALys-CTT
UCAAGUCCCUGUUCAGGCGCCA	0.19	4.66	0.0407725	tRNALys-TTT
UCUAGUGGUUAGGAUUCGGCGCU	0.19	4.66	0.0407725	tRNA-derived_pseudogene,tRNAGlu-CTC
UCGGUAGAGCAUGAGAC	3.57	88.25	0.0404533	tRNALys-CTT
GUGGUUAGGAUUCGGCGC	3.19	79.18	0.040288	tRNA-derived_pseudogene,tRNAGlu-CTC
UUCCAGCUCGAAGGACCA	0.75	18.63	0.0402576	tRNATyr-GTA
UCAGGUCCCUGUUCGGGCGCCA	1.32	33.58	0.0393091	tRNALys-TTT
GGGGUUCGAUUCCCCGACGGGGAGCCA	0.75	19.12	0.0392259	tRNAAsp-GTC
GCCCGGAUAGCUCAGUCGGUAGAGU	2.07	52.95	0.0390935	tRNALys-TTT
CAGUGGGUAGAGCAUUUGACUGC	0.19	4.9	0.0387755	tRNACys-GCA
GCCCGGCUAGCUCACUCGGUAGAGCAUGGG	0.19	4.9	0.0387755	tRNALys-CTT
GCCCGGCUAGCUCCGUCGGUAGAGCAUGA	0.19	4.9	0.0387755	tRNALys-CTT
GGGGAUGUAGCUCAGUGGUAGAGCCCAU	0.19	4.9	0.0387755	tRNAAla-AGC,tRNAAla-TGC,tRNAAla-CGC
UCCCAGCGGUGCCUCCA	0.19	4.9	0.0387755	tRNAThr-AGT
CCGUGAUCGUAUAGUGGUUAGUAC	0.75	19.36	0.0387397	tRNA-derived_pseudogene,tRNAHis-GTG
CAAUGGAGGCGUGGGU	0.94	24.27	0.0387309	tRNALeu-CAA
GCCUGGAUAGCUCAGUCGGUAGAGCAUC	0.94	24.27	0.0387309	tRNALys-TTT
GGGGGUGUAGCUCAGUGGUAGAGCGCA	0.94	24.27	0.0387309	tRNAAla-TGC
UGGCUAGGAUUCGGCG	2.63	68.14	0.038597	tRNAGlu-TTC,tRNA-derived_pseudogene
GCCCGGCUAGCUCAGUCGGGAGAGCAUGGG	3.01	80.89	0.037211	tRNALys-CTT
AGUGGUUAGGAUUCGGCG	33.63	907.45	0.0370599	tRNA-derived_pseudogene,tRNAGlu-CTC
GCCCGAAUAGCUCAGUCGGUAGAGCAUCA	0.38	10.3	0.0368932	tRNALys-TTT
GCCCGGCUAGCUCAGUCGUUAGAGCAUGGG	0.38	10.3	0.0368932	tRNALys-CTT
UAGUGGUGAGUAUCCCCGC	0.38	10.3	0.0368932	tRNAAsp-GTC
CCAAUGGAGGCGUGGGUU	0.19	5.15	0.0368932	tRNALeu-CAA
GAUAGCUCAGUCGGUAGAGCAU	0.19	5.15	0.0368932	tRNALys-TTT
GGGGGUGUAGCUCAGUGGUAGAGCACA	0.19	5.15	0.0368932	tRNAAla-TGC
GUUUCCGUAGUGUAGUGGUCAUCACUUUC	0.19	5.15	0.0368932	tRNAVal-AAC
UAGUGGUUAGUAUUCGGCG	0.19	5.15	0.0368932	tRNAGlu-CTC,tRNA-derived_pseudogene
UCCGGGUGCCCCCUCCA	0.19	5.15	0.0368932	tRNACys-GCA
AUGGAUAAGGCAUUGGCUUC	0.94	25.49	0.0368772	tRNAArg-CCT
GAAACCGGGCGGAAACACCA	0.75	20.35	0.036855	tRNAVal-AAC,tRNAVal-CAC
AACCGGGCGGAAACACCA	22.55	625.56	0.0360477	tRNAVal-AAC,tRNAVal-CAC,tRNA-derived_pseudogene
UAGUGGUUAGGAUUCGGCGCUC	1.88	52.46	0.0358368	tRNAGlu-CTC,tRNA-derived_pseudogene
[truncated: 342 more rows]

## Sheet: mitochondrial RNA
Sequence	Nuclear	Cytoplsamic	N/C	Gene
AUCAUUGGUCGUGGUUGUAGUCCGUGCG	2.82	0	N.A.	tRNA-Glu
CAUUGGUCGUGGUUGUAGUCCGUGCGAGA	3.19	0.25	12.76	tRNA-Glu
CAUUGGUCGUGGUUGUAGUCCGUGCGAG	41.9	3.43	12.2157	tRNA-Glu
UAGGAUGGGGUGUGAUAGGGGGCACGGA	2.63	0.25	10.52	tRNA-Gln
UAGGAUGGGGGGUGAUAGGUGGCA	2.07	0.25	8.28	tRNA-Gln
UAGGAUGGGGUGUGAUAGGUGUCACGG	1.88	0.25	7.52	tRNA-Gln
UAGGAUGGCGUGUGAUAGGUGG	2.63	0.49	5.36735	tRNA-Gln
CUCCCGCCUUUUUUCCCGGCGGCG	3.95	0.74	5.33784	intergenic
UAGGAUGGUGUGUGAUAGGUGGCAC	3.76	0.74	5.08108	tRNA-Gln
GAAGGUGGAUUUAGCAGUAAACUGAGAG	4.89	0.98	4.9898	s-rRNA
UAGGAUGGGGGGUGAUAGGUGGCACGGA	2.44	0.49	4.97959	tRNA-Gln
UAGGAUGGGGUGUGAUAGGUGGAA	6.01	1.23	4.88618	tRNA-Gln
UAGGAUGGUGUGUGAUAGGUGG	5.07	1.23	4.12195	tRNA-Gln
UAGGAUGGCGUGUGAUAGGUGGCA	7.7	1.96	3.92857	tRNA-Gln
CAUUGGUCGUGGUUGUAGUCCGUGC	1.88	0.49	3.83673	tRNA-Glu
UAGGAUGGGGUGUGAUAGGUGGCA	200.87	65.69	3.05785	tRNA-Gln
AGGAUGGGGUGUGAUAGGUGGCACGG	3.76	1.23	3.05691	tRNA-Gln
UAGGAUGGGGUGUGAUAGGUGG	70.84	23.53	3.01062	tRNA-Gln
AGACGGGCUCACAUCA	2.07	0.74	2.7973	tRNA-Phe
UUGGUCGUGGUUGUAGUCCGUGCG	2.07	0.74	2.7973	tRNA-Glu
UAGGAUGGUGUGUGAUAGGUGGC	4.7	1.72	2.73256	tRNA-Gln
UAGGAUGGUGUGUGAUAGGUGGCA	17.85	6.86	2.60204	tRNA-Gln
GAAUGUUUAGACGGGCUCACAUCA	3.19	1.23	2.5935	tRNA-Phe
UAGGAUGGAGUGUGAUAGGUGGCACG	3.76	1.47	2.55782	tRNA-Gln
GAAAAUGUUUAGACGGGCUCACAUCAC	4.32	1.72	2.51163	tRNA-Phe
UUGGUCGUGGUUGUAGUCCGUGCGAG	2.44	0.98	2.4898	tRNA-Glu
UAGGAUGGGGUGUGAUAGGUGGCACGGA	268.14	122.56	2.18783	tRNA-Gln
AUGUUUAGACGGGCUCACAUCACCCCAU	2.63	1.23	2.13821	tRNA-Phe
UAGGAUGGGGUGUGAUAGGUGGCAC	42.47	20.1	2.11294	tRNA-Gln
GUUAAGAUCGCAGAGCCCGGUAAUCGCAU	3.01	1.47	2.04762	tRNA-Leu
UAGGAUGGAGUGUGAUAGGUGGCACGGA	4.89	2.45	1.99592	tRNA-Gln
UAGGAUGGCGUGUGAUAGGUGGCACGGA	8.08	4.17	1.93765	tRNA-Gln
UAGGAUGGAGUGUGAUAGGUGGC	1.88	0.98	1.91837	tRNA-Gln
UAGGAUGGUGUGUGAUAGGUGGCACGGA	22.36	11.77	1.89975	tRNA-Gln
UAGGAUGGGGUGUGAUAGGUGGC	46.79	25	1.8716	tRNA-Gln
GUUAAGAUUGCAGAGCCCGGUAAUCGCAU	7.7	4.17	1.84652	tRNA-Leu
GUCGUGGUUGUAGUCCGUGCGAGA	3.57	1.96	1.82143	tRNA-Glu
GUCGAAGGUGGAUUUAGCAGUAAACUGA	6.2	3.43	1.80758	s-rRNA
CAUUGGUCGUGGUUGUAGUCCGUGCGA	18.23	10.3	1.7699	tRNA-Glu
UAGGAUGGAGUGUGAUAGGUGGCA	3.01	1.72	1.75	tRNA-Gln
UUGGUCGUGGUUGUAGUCCGUGCGAGA	7.14	4.17	1.71223	tRNA-Glu
UAGGAUGGUGUGUGAUAGGUGGCACGG	26.31	15.44	1.70402	tRNA-Gln
AUCCAUUGGUCUUAGGCC	2.07	1.23	1.68293	tRNA-Leu
UAGGAUGGCGUGUGAUAGGUGGCACG	2.07	1.23	1.68293	tRNA-Gln
CGUGGUUGUAGUCCGUGCGAGAA	2.44	1.47	1.65986	tRNA-Glu
UAGGAUGGGGGGUGAUAGGUGGCACGG	2.44	1.47	1.65986	tRNA-Gln
UAGGAUGGGGUGUGAUAGGUGGCACGGAAA	2.44	1.47	1.65986	intergenic,tRNA-Gln
UCGUGGUUGUAGUCCGUGCGAGAAUACCA	2.44	1.47	1.65986	tRNA-Glu
AAUGUUUAGACGGGCUCACAUCA	2.82	1.72	1.63953	tRNA-Phe
CGAAGGUGGAUUUAGCAGUAAACUGAG	5.45	3.43	1.58892	s-rRNA
CUCCCGCCUUUUUUCCCGGCGGCGGG	5.45	3.43	1.58892	intergenic
GAAAAUGUUUAGACGGGCUCACAUCA	3.38	2.21	1.52941	tRNA-Phe
GAAAGGACAAGAGAAAUAAGGCCUA	1.88	1.23	1.52846	l-rRNA
UAGGAUGGGGUGUGAUAGGUGGCACGG	345.56	226.25	1.52734	tRNA-Gln
UAGGAUGGGGUGUGAUAGGUGGCAA	5.83	3.92	1.48724	tRNA-Gln
UAGGAUGGGGUGUGAUAGGUGGCACG	99.78	67.16	1.48571	tRNA-Gln
UAGGAUGGUGUGUGAUAGGUGGCACG	12.03	8.33	1.44418	tRNA-Gln
UAGGAUGGGGUGUGAUAGGUGGA	5.26	3.68	1.42935	tRNA-Gln
GUUAAGAUGGCAGAGCCCGGUAAUCGCAU	44.35	31.87	1.39159	tRNA-Leu
UAGGAUGGAGUGUGAUAGGUGGCACGG	7.33	5.39	1.35993	tRNA-Gln
GUUUAGACGGGCUCACAUCAC	3.95	2.94	1.34354	tRNA-Phe
UAGGAUGGCGUGUGAUAGGUGGCACGG	6.95	5.39	1.28942	tRNA-Gln
CAUUGGUCGUGGUUGUAGUCCGUGCG	16.91	13.24	1.27719	tRNA-Glu
GGUAAGAUGGCAGAGCCCGGUAAUCGCA	2.44	1.96	1.2449	tRNA-Leu
ACUGGAAAGUGCACUUGGACGA	2.07	1.72	1.20349	s-rRNA
UAAAACUCAAAGGACCUGGCGGUG	2.07	1.72	1.20349	s-rRNA
AGAAAUAUGUCUGAUAAAA	2.63	2.21	1.19005	tRNA-Ile
UAGGAUGGGGUGUGAUAGGUGGCACA	2.63	2.21	1.19005	tRNA-Gln
AUGUUUAGACGGGCUCACAUCAC	4.89	4.41	1.10884	tRNA-Phe
AACUUAAGGGUCGAAGGUGGA	1.88	1.72	1.09302	s-rRNA
AGGUGGAUUUAGCAGUAAACUGAG	1.88	1.72	1.09302	s-rRNA
UUUAGACGGGCUCACAUCACC	2.63	2.45	1.07347	tRNA-Phe
GGUCGUGGUUGUAGUCCGUGCGAGA	1.88	1.96	0.959184	tRNA-Glu
UAGGAUGGUGUGUGAUAGGU	2.07	2.21	0.936652	tRNA-Gln
UCGUGGUUGUAGUCCGUGCGA	2.63	2.94	0.894558	tRNA-Glu
GUUUAGACGGGCUCACAUCA	6.76	7.6	0.889474	tRNA-Phe
AUGCUAAGACUUCACCAGUCAAAGCG	7.33	8.33	0.879952	l-rRNA
AGUAGAGUGCUUAGUUGAACAGGGC	1.88	2.21	0.850679	s-rRNA
UCGUGGUUGUAGUCCGUGCGAGAA	1.88	2.21	0.850679	tRNA-Glu
AGUGCUUAGUUGAACAGGGCCCUG	4.51	5.39	0.836735	s-rRNA
AACUCAAAGGACCUGGCGGUG	2.25	2.7	0.833333	s-rRNA
CUCCCGCCUUUUUUCCCGGCGGCGGGA	29.13	35.79	0.813915	intergenic
CGAAGGUGGAUUUAGCAGUAAACUGA	1.88	2.45	0.767347	s-rRNA
UAGGAUGGUGUGUGAUAGG	1.88	2.45	0.767347	tRNA-Gln
AUGUUUAGACGGGCUCACAUCA	6.58	8.58	0.7669	tRNA-Phe
UUGGUCGUGGUUGUAGUCCGUGCGA	3.38	4.66	0.725322	tRNA-Glu
GAAUGUUUAGACGGGCUCACA	2.82	3.92	0.719388	tRNA-Phe
UGUUUAGACGGGCUCACAUCACCCCAU	2.82	3.92	0.719388	tRNA-Phe
AGUGCUUAGUUGAACAGGGCCCUGAA	2.07	2.94	0.704082	s-rRNA
AUUGGUCGUGGUUGUAGUCCGUGCGA	2.07	2.94	0.704082	tRNA-Glu
GUGGUUGUAGUCCGUGCGAG	1.88	2.7	0.696296	tRNA-Glu
AUGUUUAGACGGGCUCACAUCACC	3.19	4.66	0.684549	tRNA-Phe
GUUAAGAUGGCAGAGCCCGGUAAUCGCAUA	3.38	5.15	0.656311	tRNA-Leu
AACAGCUAUCCAUUGGUCUUAGGCCC	2.25	3.43	0.655977	tRNA-Leu
CAAGACGAGAAGACCCUAUGG	1.69	2.7	0.625926	l-rRNA
GAGUAGAGUGCUUAGUUGAACAGGGCCC	1.69	2.7	0.625926	s-rRNA
GUGGAUUUAGCAGUAAACUGAG	6.95	11.28	0.616135	s-rRNA
AUGUUUAGACGGGCUCACAUCACCCC	1.5	2.45	0.612245	tRNA-Phe
AUGCUAAGACUUCACCAGUCAAAGCGA	5.45	9.07	0.600882	l-rRNA
AAGGGCUUAGCUUAAUUAAAGUGG	1.88	3.19	0.589342	tRNA-Ala
UAGGAUGGAGUGUGAUAGGUG	1.88	3.19	0.589342	tRNA-Gln
UGGAUUUAGCAGUAAACUGAG	4.7	8.09	0.580964	s-rRNA
GGUGGAUUUAGCAGUAAACUGAG	5.07	8.82	0.57483	s-rRNA
GUGGUUGUAGUCCGUGCGAGAA	3.38	5.88	0.57483	tRNA-Glu
AAACCCCCUUAUUUCUACCA	1.69	2.94	0.57483	tRNA-Ile
GCUUUGGGUGCUAAUGGUGGAGUU	3.76	6.62	0.567976	tRNA-Pro
AUGUUUAGACGGGCUCACAUC	2.07	3.68	0.5625	tRNA-Phe
GAUGUCUGUGUGGAAAGCGGCUGUG	7.14	12.75	0.56	intergenic
GAAGGUGGAUUUAGCAGUAAACUGAGA	3.01	5.39	0.558442	s-rRNA
GGUAAGAUGGCAGAGCCCGGUAAUCG	1.88	3.43	0.548105	tRNA-Leu
GUUAAGAUGGCAGAGCCCGGUAAUCGC	54.12	100.01	0.541146	tRNA-Leu
GUUAAGAUUGCAGAGCCCGGUAAUCGC	7.14	13.24	0.539275	tRNA-Leu
AACAGCUAUCCAUUGGUCUUAGGC	1.32	2.45	0.538776	tRNA-Leu
ACGUUAGGUCAAGGUGUA	1.32	2.45	0.538776	s-rRNA
GAAAAUGUUUAGACGGGCUCACAU	1.32	2.45	0.538776	tRNA-Phe
GGUGGAUUUAGCAGUAAACUGAGAG	2.63	4.9	0.536735	s-rRNA
AAAACUCAAAGGACCUGGCGGUG	5.26	9.81	0.536188	s-rRNA
CUGGAAAGUGCACUUGGACGAAC	5.07	9.56	0.530335	s-rRNA
AGUAGAGUGCUUAGUUGAACAGGGCCC	1.69	3.19	0.529781	s-rRNA
GCUUUGGGUGCUAAUGGUGGAG	1.69	3.19	0.529781	tRNA-Pro
UAGGAUGGGGUGUGAUAGGU	27.62	52.21	0.529017	tRNA-Gln
AGUGCUUAGUUGAACAGGGCCCUGA	3.76	7.11	0.528833	s-rRNA
UAGGAUGGGGUGUGAUAGGUGGCACGGAA	2.25	4.41	0.510204	intergenic,tRNA-Gln
AGUAGAGUGCUUAGUUGAACAGGGCC	2.44	4.9	0.497959	s-rRNA
ACUGGAAAGUGCACUUGGACGAA	4.13	8.33	0.495798	s-rRNA
UAGGAUGGCGUGUGAUAGGUG	1.69	3.43	0.492711	tRNA-Gln
UAGGAUGGGGUGUGAUAG	8.08	16.42	0.492083	tRNA-Gln
UGGAUUUAGCAGUAAACUGAGAGUAG	1.32	2.7	0.488889	s-rRNA
UAGUUGAACAGGGCCCUGAAGCGCGUA	3.01	6.37	0.472527	s-rRNA
AAGGUGGAUUUAGCAGUAAACUGA	1.13	2.45	0.461224	s-rRNA
UAAGAUGGCAGAGCCCGGUA	1.13	2.45	0.461224	tRNA-Leu
UGAUGUCUGUGUGGAAAGCGGCUG	1.13	2.45	0.461224	intergenic
ACUGGAAAGUGCACUUGGACG	2.25	4.9	0.459184	s-rRNA
UUUAGACGGGCUCACAUCA	2.25	4.9	0.459184	tRNA-Phe
UGUUUAGACGGGCUCACAUCAC	8.27	18.14	0.455899	tRNA-Phe
CAGAGUGUUGCUUAACACAAAG	1.88	4.17	0.450839	tRNA-Val
AAGGUGGAUUUAGCAGUAAACUGAG	3.19	7.11	0.448664	s-rRNA
AGAUUGUGAAUCUGACAACAGAGG	1.5	3.43	0.437318	tRNA-His
AUCACCCCAUAAACACCA	1.5	3.43	0.437318	tRNA-Phe
AUGUUGGAUCAGGACAUCCCGAUGGUG	1.5	3.43	0.437318	l-rRNA
UCGUGGUUGUAGUCCGUGCGAGAAU	2.44	5.64	0.432624	tRNA-Glu
AGUGCUUAGUUGAACAGGGCC	1.69	3.92	0.431122	s-rRNA
GAAGGUGGAUUUAGCAGUAAACUGAG	11.09	25.74	0.430847	s-rRNA
GAAGGUGGAUUUAGCAGUAAACUGA	6.2	14.46	0.428769	s-rRNA
AACAUAUCUGAACACACAAUAGCUA	1.13	2.7	0.418519	s-rRNA
AGAGUGGGGUUUUGCAGUC	1.13	2.7	0.418519	tRNA-Ala
GUGAAGAGGCGGGCAUGACA	1.13	2.7	0.418519	l-rRNA
GUUAAGAUGGCAGAGCCCGGUAAUCGCAA	1.13	2.7	0.418519	intergenic,tRNA-Leu
GAAAAAGUCAUGGAGGCCAUGGGGUUGG	2.25	5.39	0.41744	tRNA-Ser
GUGGAUUUAGCAGUAAACUGA	2.25	5.39	0.41744	s-rRNA
AACAGCUAUCCAUUGGUCUUAGGCC	1.32	3.19	0.413793	tRNA-Leu
UUGAACAGGGCCCUGAAGCGCG	1.32	3.19	0.413793	s-rRNA
CGAUGUUGGAUCAGGACA	2.82	6.86	0.411079	l-rRNA
AGAUGGCAGAGCCCGGUAAUCG	4.13	10.05	0.410945	tRNA-Leu
GGUAAGAUGGCAGAGCCCGGUA	1.5	3.68	0.407609	tRNA-Leu
UAUGAUGUCUGUGUGGAAAGCGG	1.5	3.68	0.407609	intergenic
UGAACAGGGCCCUGAAGCGCGUA	1.5	3.68	0.407609	s-rRNA
UAGGAUGGUGUGUGAUAGGUG	6.39	15.69	0.407266	tRNA-Gln
UGGUCGUGGUUGUAGUCCGUGCG	1.69	4.17	0.405276	tRNA-Glu
UGGUCGUGGUUGUAGUCCGUGCGAGA	2.07	5.15	0.401942	tRNA-Glu
GUUAAGAUCGCAGAGCCCGGUAAUCGCA	8.46	21.08	0.401328	tRNA-Leu
UCGUGGUUGUAGUCCGUGCGAGA	2.25	5.64	0.398936	tRNA-Glu
GAGUAGAGUGCUUAGUUGAACAGGGCC	3.19	8.09	0.394314	s-rRNA
CAAGACGAGAAGACCCUAUGGAGCUUU	1.32	3.43	0.38484	l-rRNA
AACUUAAGGGUCGAAGGUG	1.13	2.94	0.384354	s-rRNA
ACUUAAGGGUCGAAGGUG	1.13	2.94	0.384354	s-rRNA
GUUAAAAUGGCAGAGCCCGGUAAUCGC	1.13	2.94	0.384354	tRNA-Leu
UUGUAGUCCGUGCGAGA	1.13	2.94	0.384354	tRNA-Glu
AAAAUGUUUAGACGGGCUCACA	0.94	2.45	0.383673	tRNA-Phe
CGUGGUUGUAGUCCGUGCGA	0.94	2.45	0.383673	tRNA-Glu
GUGGUUGUAGUCCGUGCGAGAAUAC	0.94	2.45	0.383673	tRNA-Glu
UUAACUUGACCGCUCUG	0.94	2.45	0.383673	tRNA-Val
GUUUAGACGGGCUCACAUCACC	1.69	4.41	0.38322	tRNA-Phe
ACAGCUAUCCAUUGGUCUUAGGCCC	1.5	3.92	0.382653	tRNA-Leu
GUUAAGAUGGCAGAGCCCGGUAAUCGCA	205.94	549.57	0.374729	tRNA-Leu
CUUUGGGUGCUAAUGGUGGAGUU	1.88	5.15	0.365049	tRNA-Pro
GUUAAGAUCGCAGAGCCCGGUAAUCGC	1.88	5.15	0.365049	tRNA-Leu
AAACUCAAAGGACCUGGCGGUG	1.5	4.17	0.359712	s-rRNA
CUGGAAAGUGCACUUGGACGAA	1.5	4.17	0.359712	s-rRNA
UGUUUAGACGGGCUCACAUCACCC	1.5	4.17	0.359712	tRNA-Phe
AUGGCUGAGUGAAGCAUUGGACUG	1.32	3.68	0.358696	tRNA-Tyr
AUGUCUGUGUGGAAAGCGGCUG	1.32	3.68	0.358696	intergenic
CCUCGAUGUUGGAUCAGGACA	1.32	3.68	0.358696	l-rRNA
AGAAGACCCUAUGGAGCUUUA	1.13	3.19	0.354232	l-rRNA
AUGGCUGAGUGAAGCAUUGGACUGU	1.13	3.19	0.354232	tRNA-Tyr
GUUAAGAUGGCAGAGUCCGGU	1.13	3.19	0.354232	tRNA-Leu
UUUAGACGGGCUCACAUCAC	1.13	3.19	0.354232	tRNA-Phe
UGGAUUUAGCAGUAAACUGAGAG	3.01	8.58	0.350816	s-rRNA
UAGGAUGGGGUGUGAUAGGUG	61.26	174.77	0.350518	tRNA-Gln
AGAGUGCUUAGUUGAACAGGGCCCUGA	0.94	2.7	0.348148	s-rRNA
UACUGGAAAGUGCACUUGGACGAA	0.94	2.7	0.348148	s-rRNA
GAAUGUUUAGACGGGCUCA	6.76	19.86	0.340383	tRNA-Phe
GUGGUUGUAGUCCGUGCGAGA	2.07	6.13	0.337684	tRNA-Glu
AUUUCAACUUAACUUGACCGCUCUGACCA	1.32	3.92	0.336735	tRNA-Val
GUUAAGAUUGCAGAGCCCGGUAAUC	1.32	3.92	0.336735	tRNA-Leu
AGACGAGAAGACCCUAUGGAGCU	1.88	5.64	0.333333	l-rRNA
UGGUCGUGGUUGUAGUCCGUGCGAG	2.44	7.35	0.331973	tRNA-Glu
AAGGGCUUAGCUUAAUUAAAGUGGCUGA	1.69	5.15	0.328155	tRNA-Ala
UAGACGGGCUCACAUCACC	2.07	6.37	0.324961	tRNA-Phe
GUUAAGAUUGCAGAGCCCGGUAA	21.23	65.45	0.32437	tRNA-Leu
AAAAGUAAAAGGAACUCGGCA	0.94	2.94	0.319728	l-rRNA
AAAGUAAAAGGAACUCGGCA	0.94	2.94	0.319728	l-rRNA
AAGGGCUUUGCUUAAUUAAAGUGGC	0.94	2.94	0.319728	tRNA-Ala
CGUGGUUGUAGUCCGUGCGAG	0.94	2.94	0.319728	tRNA-Glu
UGAGUGAAGCAUUGGACUG	0.94	2.94	0.319728	tRNA-Tyr
UAGACGGGCUCACAUCA	1.32	4.17	0.316547	tRNA-Phe
GUUAAGAUGGCAGAGCCCGGUAAUC	12.4	39.22	0.316165	tRNA-Leu
ACCACGAUCAAAAGGGACAA	1.13	3.68	0.307065	s-rRNA
AUCUGGUUAGGCUGGUGUUAGGGUU	1.13	3.68	0.307065	intergenic
UGGUUGUAGUCCGUGCG	1.13	3.68	0.307065	tRNA-Glu
GUGGAUUUAGCAGUAAACUGAGAG	3.01	9.81	0.30683	s-rRNA
GCUUUGGGUGCUAAUGGUGGAGU	1.88	6.13	0.306688	tRNA-Pro
UCGUGGUUGUAGUCCGUGCGAG	1.88	6.13	0.306688	tRNA-Glu
GUUAAAAUGGCAGAGCCCGGUAAUCG	2.63	8.58	0.306527	tRNA-Leu
AUCAGAUUGUGAAUCUGACAACAGAGGCU	0.75	2.45	0.306122	tRNA-His
CAGAGAAUGGUUUAAAUUAGAAUC	0.75	2.45	0.306122	tRNA-Pro
GAGAAAGCUCACAAGA	0.75	2.45	0.306122	tRNA-Ser
GAGAAAGCUCACAAGAACUGCAA	0.75	2.45	0.306122	tRNA-Ser
GAUGUCUGUGUGGAAAGCGGC	0.75	2.45	0.306122	intergenic
GUGGUUGUAGUCCGUGCGAGAAUA	4.51	14.95	0.301672	tRNA-Glu
UGUCUGUGUGGAAAGCGGCUG	1.69	5.64	0.299645	intergenic
CUGAAAAUGUUUAGACGGGCU	1.32	4.41	0.29932	tRNA-Phe
GUUAAAAUGGCAGAGCCCGGUAAUCGCA	5.64	18.87	0.298887	tRNA-Leu
GAAAAUGUUUAGACGGGCUCACA	4.13	13.97	0.295634	tRNA-Phe
UAGGAUGGGGUGUGAUA	6.95	23.53	0.295368	tRNA-Gln
GAUGUUGGAUCAGGACAUCCCGAUGGUG	0.94	3.19	0.294671	l-rRNA
GUUAAGAUGGCAGAGCCCGGUAAUCGAA	0.94	3.19	0.294671	tRNA-Leu
UGCUUAGUUGAACAGGGCC	0.94	3.19	0.294671	s-rRNA
GUGGAUUUAGCAGUAAACUGAGA	1.5	5.15	0.291262	s-rRNA
GUUGAACAGGGCCCUGAAGCGCGUA	1.5	5.15	0.291262	s-rRNA
GUUUAGACGGGCUCACAUC	1.5	5.15	0.291262	tRNA-Phe
UAGUUGAACAGGGCCCUGAAGCGCG	1.5	5.15	0.291262	s-rRNA
UAGGAUGGGGUGUGAUAGG	9.96	34.32	0.29021	tRNA-Gln
UGGAUUUAGCAGUAAACUGAGAGUA	1.13	3.92	0.288265	s-rRNA
UGGUUGUAGUCCGUGCGAGAA	2.82	9.81	0.287462	tRNA-Glu
AAGAUAAAAUUUGAAAUCUGGU	1.69	5.88	0.287415	intergenic
AAGUGCACUUGGACGAAC	2.25	7.84	0.28699	s-rRNA
GUUAAGAUAGCAGAGCCCGGUAAUCGCA	5.26	18.38	0.286181	tRNA-Leu
GUUAAGAUUGCAGAGCCCGGUAAUCGCA	24.43	85.79	0.284765	tRNA-Leu
AAUGUUUAGACGGGCUCA	2.44	8.58	0.284382	tRNA-Phe
CGUGGUUGUAGUCCGUGCGAGAAU	1.32	4.66	0.283262	tRNA-Glu
CUGAGUGAAGCAUUGGACUG	1.32	4.66	0.283262	tRNA-Tyr
AACUAAGUGUUUGUGGGUU	0.75	2.7	0.277778	tRNA-Asn
CCAGAACACUACGAGCCACAG	0.75	2.7	0.277778	s-rRNA
CGUGGUUGUAGUCCGUGCGAGAAUACC	0.75	2.7	0.277778	tRNA-Glu
GGUUGUAGUCCGUGCGAGAA	0.75	2.7	0.277778	tRNA-Glu
GAUGUCUGUGUGGAAAGCGGCUG	12.03	43.39	0.277253	intergenic
ACAGCUAUCCAUUGGUCUUA	2.44	8.82	0.276644	tRNA-Leu
GUUAAGAUCGCAGAGCCCGGUAA	6.39	23.29	0.274367	tRNA-Leu
AGGACAAGAGAAAUAAGGC	0.94	3.43	0.274052	l-rRNA
GAUUGUGAAUCUGACAACAGAGG	2.07	7.6	0.272368	tRNA-His
AAUGGCUGAGUGAAGCAUUGGACUG	1.13	4.17	0.270983	tRNA-Tyr
UGGAUUUAGCAGUAAACUGA	1.13	4.17	0.270983	s-rRNA
AAAAUGUUUAGACGGGCUCA	3.38	12.5	0.2704	tRNA-Phe
GAAAAUGUUUAGACGGG	1.69	6.37	0.265306	tRNA-Phe
UGUAGUCCGUGCGAGAAUA	3.38	12.75	0.265098	tRNA-Glu
AACUUAACUUGACCGCUCUGAC	4.13	15.69	0.263225	tRNA-Val
UGUUUAGACGGGCUCACAUCACC	5.64	21.82	0.258478	tRNA-Phe
AAGGGCUUUGCUUAAUUAAAGUGGCUGA	0.94	3.68	0.255435	tRNA-Ala
UUGUAGUCCGUGCGAGAAU	2.63	10.3	0.25534	tRNA-Glu
CAUGCUAAGACUUCACCAGUCAAAGCGA	3.38	13.24	0.255287	l-rRNA
UGGAAAGUGCACUUGGACGAA	1.5	5.88	0.255102	s-rRNA
AAGGUGUAGCCCAUGAGGUGG	0.75	2.94	0.255102	s-rRNA
AGGACAAGAGAAAUAAGGCC	0.75	2.94	0.255102	l-rRNA
GAGUGAAGCAUUGGACUGU	0.75	2.94	0.255102	tRNA-Tyr
UCUGGUUAGGCUGGUGUU	0.75	2.94	0.255102	intergenic
GUUAAGAUGGCAGAGCCCGGUAA	115.56	453.97	0.254554	tRNA-Leu
CAAGACGAGAAGACCCUAUGGAG	2.07	8.33	0.248499	l-rRNA
CACUGAAAAUGUUUAGACGGGCU	2.07	8.33	0.248499	tRNA-Phe
UGUGAAUCUGACAACAGAG	1.88	7.6	0.247368	tRNA-His
UGUUUAGACGGGCUCACAUCA	7.89	32.11	0.245718	tRNA-Phe
ACUUAACUUGACCGUUCUGAC	1.32	5.39	0.244898	tRNA-Val
ACUUACACUUAGGAGAUUUC	1.5	6.13	0.244698	tRNA-Val
GUUAAAAUGGCAGAGCCCGGUA	5.45	22.31	0.244285	tRNA-Leu
GAGAAAGCUCACAAGAACUGCA	4.13	16.91	0.244234	tRNA-Ser
AAAUGUUUAGACGGGCUCAC	1.13	4.66	0.242489	tRNA-Phe
UUAGACGGGCUCACAUCA	1.13	4.66	0.242489	tRNA-Phe
GAUGUCUGUGUGGAAAGCGGCUGU	2.07	8.58	0.241259	intergenic
AUGUUUAGACGGGCUCACAUCACCC	0.94	3.92	0.239796	tRNA-Phe
CGUGGUUGUAGUCCGUGCGAGAAUA	1.69	7.11	0.237693	tRNA-Glu
GUUAAGAUAGCAGAGCCCGG	1.69	7.11	0.237693	tRNA-Leu
AGUGCACUUGGACGAAC	1.5	6.37	0.235479	s-rRNA
UGGUCGUGGUUGUAGUCCGUGCGA	2.25	9.56	0.235356	tRNA-Glu
AUGUUUAGACGGGCUCACAUCACCCCAUA	0.75	3.19	0.23511	tRNA-Phe
GUUAAGAUGGCAGAGCUCGGUAA	0.75	3.19	0.23511	tRNA-Leu
GUGCUUAGUUGAACAGGGCC	1.32	5.64	0.234043	s-rRNA
ACAGCUAUCCAUUGGUCUUAGGC	0.56	2.45	0.228571	tRNA-Leu
CAAAGUAAGCGCAAGUACCCA	0.56	2.45	0.228571	s-rRNA
CUGAAGUAGGAACCAGAUG	0.56	2.45	0.228571	intergenic
GGAAGAUUUAUAGGUAGAGGCGACA	0.56	2.45	0.228571	l-rRNA
GGGUUUACGACCUCGAUGUUGGA	0.56	2.45	0.228571	l-rRNA
GUUAAAAUGGCAGAGCCCG	0.56	2.45	0.228571	tRNA-Leu
GUUAAGAUGGCAGAGCCCGGUAAUCGA	0.56	2.45	0.228571	tRNA-Leu
UGACAAAGUUAUGAAAUGG	0.56	2.45	0.228571	intergenic
GUUAAGAUCGCAGAGCCCGGU	7.14	31.38	0.227533	tRNA-Leu
ACAUCACCCCAUAAACACCA	1.5	6.62	0.226586	tRNA-Phe
GUUAAAAUGGCAGAGCCCGGU	3.76	16.67	0.225555	tRNA-Leu
AAAACUCAAAGGACCUGGCGGUGCU	0.94	4.17	0.22542	s-rRNA
AGACGGGCUCACAUCACC	0.94	4.17	0.22542	tRNA-Phe
AUCAUUGGUCGUGGUUGU	0.94	4.17	0.22542	tRNA-Glu
CACAAGAACUGCUAACUCAUG	0.94	4.17	0.22542	tRNA-Ser
CUUACACUUAGGAGAUUUC	0.94	4.17	0.22542	tRNA-Val
GAAGGUGGAUUUAGCAGUAAACU	0.94	4.17	0.22542	s-rRNA
GUUAAGAUAGCAGAGCCCGGU	4.51	20.1	0.224378	tRNA-Leu
GUUAAGAUGGCAGAGCCCGG	52.8	238.51	0.221374	tRNA-Leu
GUUAAAAUGGCAGAGCCCGG	1.5	6.86	0.218659	tRNA-Leu
AAAAAUUUCGGUUGGGG	0.75	3.43	0.218659	l-rRNA
AAGUAAAAGGAACUCGGCA	0.75	3.43	0.218659	l-rRNA
UCUAACAACAUGGCUUUCUCAC	0.75	3.43	0.218659	tRNA-Ser
GUUAAGAUAGCAGAGCCCGGUA	7.33	33.58	0.218285	tRNA-Leu
GUUAAGAUUGCAGAGCCCGGUA	31	143.15	0.216556	tRNA-Leu
GUUAAGAUGGCAGAGCCCGGUAAUCA	1.69	7.84	0.215561	tRNA-Leu
AAAAAGUAAAAGGAACUCGGCA	1.32	6.13	0.215334	l-rRNA
AAAACUCAAAGGACCUGGCGGUGCUU	0.94	4.41	0.213152	s-rRNA
GAGUGCUUAGUUGAACAGGGCCC	0.94	4.41	0.213152	s-rRNA
AUGUUUAGACGGGCUCACAUCACCCCA	3.19	15.2	0.209868	tRNA-Phe
AUGUUUAGACGGGCUCACAU	5.83	27.94	0.208661	tRNA-Phe
AACUUAAGGGUCGAAGGU	0.56	2.7	0.207407	s-rRNA
AGUAAGGUCAGCUAAAUAAG	0.56	2.7	0.207407	tRNA-Met
AUGCUAAGACUUCACCAGUCAAAGCGAA	0.56	2.7	0.207407	l-rRNA
CCGGAGCAGGAACAGGUU	0.56	2.7	0.207407	COX1
CGGAGCAGGAACAGGUU	0.56	2.7	0.207407	COX1
GAAGCCGGCGUAAAGAGUG	0.56	2.7	0.207407	s-rRNA
GAUUUAGCAGUAAACUGAGAG	0.56	2.7	0.207407	s-rRNA
GCUUAGUUGAACAGGGCCCU	0.56	2.7	0.207407	s-rRNA
GUUUUUCAUAUCAUUGGUCGU	0.56	2.7	0.207407	tRNA-Glu
UCUGGUUAGGCUGGUG	0.56	2.7	0.207407	intergenic
GUUAAGAUCGCAGAGCCCGGUA	11.84	57.11	0.207319	tRNA-Leu
GAUGUCUGUGUGGAAAGCGGCU	1.32	6.37	0.207221	intergenic
GUUAAGAUGGCAGAGCCCGGUA	226.99	1097.18	0.206885	tRNA-Leu
GAACAGGGCCCUGAAGCGCGUA	2.63	12.75	0.206275	s-rRNA
AUACAGACCAAGAGCCUUC	0.75	3.68	0.203804	tRNA-Trp
GUAAGGUCAGCUAAAUAAGCUAUCGGG	0.75	3.68	0.203804	tRNA-Met
UUUGGGUGCUAAUGGUGGAGU	0.75	3.68	0.203804	tRNA-Pro
AAGGGCUUAGCUUAAUUAAAGUGGC	1.69	8.33	0.202881	tRNA-Ala
GUGGUUGUAGUCCGUGCGAGAAU	1.69	8.33	0.202881	tRNA-Glu
GUUAAGAUAGCAGAGCCCGGUAAUCG	6.01	29.66	0.20263	tRNA-Leu
AAUGUUUAGACGGGCUCAC	2.63	12.99	0.202463	tRNA-Phe
GUUAAGAUGGCAGAGCUCGGU	1.13	5.64	0.200355	tRNA-Leu
CUCACAAGAACUGCUAACUCAUG	2.25	11.28	0.199468	tRNA-Ser
GUUAAGAUGGCAGAGUCCGGUA	1.13	5.88	0.192177	tRNA-Leu
AAAAAAGUAAAAGGAACUCGGCAA	0.94	4.9	0.191837	l-rRNA
AAAACUCAAAGGACCUGGCGG	0.94	4.9	0.191837	s-rRNA
AAGACGAGAAGACCCUAUGGAGCU	0.94	4.9	0.191837	l-rRNA
CGUGGUUGUAGUCCGUGCGAGA	0.94	4.9	0.191837	tRNA-Glu
GUUAAGAUUGCAGAGCCCGG	7.7	40.2	0.191542	tRNA-Leu
ACUUACACUUAGGAGAUUUCA	3.19	16.67	0.191362	tRNA-Val
AACUUACACUUAGGAGAUUUCAA	1.5	7.84	0.191327	tRNA-Val
AGAGAUGUGUUUAAGUGCUGUGG	0.75	3.92	0.191327	intergenic
AGUGAAGCAUUGGACUGUA	0.75	3.92	0.191327	tRNA-Tyr
CCCGGUAAUCGCAUAAAACUUAA	0.75	3.92	0.191327	tRNA-Leu
GUUAAGAUUGCAGAGCCCGGUAAUCG	23.3	122.07	0.190874	tRNA-Leu
AGAAGACCCUAUGGAGCUU	0.56	2.94	0.190476	l-rRNA
CGAUGUUGGAUCAGGACAU	0.56	2.94	0.190476	l-rRNA
CUUAAGGGUCGAAGGUGGA	0.56	2.94	0.190476	s-rRNA
CUUUGGGUGCUAAUGGUGGAG	0.56	2.94	0.190476	tRNA-Pro
GACGGCAUCUACGGCUCAA	0.56	2.94	0.190476	COX3
GAGUGCUUAGUUGAACAGGGCCCU	0.56	2.94	0.190476	s-rRNA
UGUGAAUCUGACAACAGAGG	0.56	2.94	0.190476	tRNA-His
UUAAGGGUCGAAGGUGGAU	0.56	2.94	0.190476	s-rRNA
GUUAAGAUCGCAGAGCCCGGUAAUCG	5.83	30.64	0.190274	tRNA-Leu
GUUAAGAUUGCAGAGCCCGGU	18.98	100.26	0.189308	tRNA-Leu
AUUGUGAAUCUGACAACAGA	3.19	16.91	0.188646	tRNA-His
GUUAAAAUGGCAGAGCCCGGUAA	2.07	11.03	0.18767	tRNA-Leu
CGUGGUUGUAGUCCGUGCGAGAAUACCA	4.32	23.04	0.1875	tRNA-Glu
UGUUUAGACGGGCUCACAUC	2.25	12.01	0.187344	tRNA-Phe
AAAGAUAAAAUUUGAAAUCUGG	1.88	10.05	0.187065	intergenic
GUUAAGAUGGCAGAGCCCGGU	133.04	712.58	0.186702	tRNA-Leu
GUUAAGAUUGCAGAGCCCG	1.69	9.07	0.186329	tRNA-Leu
UUGUAGUCCGUGCGAGAA	1.32	7.11	0.185654	tRNA-Glu
GUUUUUCAUAUCAUUGGUCGUGG	2.25	12.26	0.183524	tRNA-Glu
UACUGGAAAGUGCACUUGGACGAAC	3.01	16.42	0.183313	s-rRNA
GCAAGACGAGAAGACCCUAUGGAG	0.75	4.17	0.179856	l-rRNA
UAUUAAAGGUUCGUUUG	0.75	4.17	0.179856	l-rRNA
GUUAAGAUGGCAGAGCCCGGA	1.13	6.37	0.177394	tRNA-Leu
ACAGCUAUCCAUUGGUCUUAGGCCCC	0.56	3.19	0.175549	tRNA-Leu
AGGACAUCCCGAUGGUGCA	0.56	3.19	0.175549	l-rRNA
CUGAGUGAAGCAUUGGACUGUA	0.56	3.19	0.175549	tRNA-Tyr
GAGUGAAGCAUUGGACU	0.56	3.19	0.175549	tRNA-Tyr
GUGUACUGGAAAGUGCACUUGGACGAA	0.56	3.19	0.175549	s-rRNA
GUUUUUCAUAUCAUUGGUCGUG	0.94	5.39	0.174397	tRNA-Glu
UACAAGACUGGUGUAUUAG	0.94	5.39	0.174397	intergenic
GAUUGUGAAUCUGACAACAGAG	1.32	7.6	0.173684	tRNA-His
GAAAAUGUUUAGACGGGCUCA	5.45	31.87	0.171007	tRNA-Phe
GUUAAGAUGGCAGAGCCCG	9.4	55.15	0.170444	tRNA-Leu
GUUAAGAUGGCAGAGCCCGGUAAUA	0.75	4.41	0.170068	tRNA-Leu
UCGUGGUUGUAGUCCGUGCGAGAAUA	0.94	5.64	0.166667	tRNA-Glu
UGUUUAGACGGGCUCACAUCACCCC	0.94	5.64	0.166667	tRNA-Phe
UCUGGUUAGGCUGGUGUUA	1.5	9.07	0.16538	intergenic
ACAGCUAUCCAUUGGUCU	1.13	6.86	0.164723	tRNA-Leu
UCAACUUAACUUGACCGCUCUGACCA	1.13	6.86	0.164723	tRNA-Val
AGCAAGACGAGAAGACCCUAUGGAGCU	0.56	3.43	0.163265	l-rRNA
AGUGAAGCAUUGGACUG	0.56	3.43	0.163265	tRNA-Tyr
CAACUUAACUUGACCA	0.56	3.43	0.163265	tRNA-Val
GUUAAGAUGGCAGAGUCCGGUAAUCG	0.56	3.43	0.163265	tRNA-Leu
GUUAAGAUGGCAGAUCCCGGU	0.56	3.43	0.163265	tRNA-Leu
UGGAAAGUGCACUUGGACGA	0.56	3.43	0.163265	s-rRNA
GUUAAGAUAGCAGAGCCCGGUAA	2.44	14.95	0.163211	tRNA-Leu
GAGGCCGGAGCAGGAACAGGU	0.75	4.66	0.160944	COX1
GUUAAGAUGGCAGAGCC	0.75	4.66	0.160944	tRNA-Leu
UGAACAGGGCCCUGAAGCGCG	0.75	4.66	0.160944	s-rRNA
GUUAAGAUGGCAGAGCCCGGUAAUCG	112.93	704.24	0.160357	tRNA-Leu
GAUGUCUGUGUGGAAAGCGG	3.38	21.08	0.160342	intergenic
GAGUGAAGCAUUGGACUG	0.94	5.88	0.159864	tRNA-Tyr
GUGGUUGUAGUCCGUGCGA	0.94	5.88	0.159864	tRNA-Glu
GUUAAGAUUGCAGAGCCCGGUAAU	11.27	70.6	0.159632	tRNA-Leu
AAAAAAAGUAAAAGGAACUCGGCAA	1.5	9.56	0.156904	l-rRNA
AAAAUGUUUAGACGGGCUCACAU	0.38	2.45	0.155102	tRNA-Phe
ACUCAACUUGACCGCUCUGACCA	0.38	2.45	0.155102	tRNA-Val
ACUUACACUUAGGAGAUUUCAACUUA	0.38	2.45	0.155102	tRNA-Val
AGCUCCGAGGUGAUUUUCAUA	0.38	2.45	0.155102	tRNA-Cys
AGGCUAAAUCCUAUAUAUCUUACCA	0.38	2.45	0.155102	tRNA-Asp
AGUGCUUAGUUGAACAGGGCCCU	0.38	2.45	0.155102	s-rRNA
CAGGUUAGAAUGAGGAGGUCU	0.38	2.45	0.155102	intergenic
CCAGAACACUACGAGCCACA	0.38	2.45	0.155102	s-rRNA
CUUAAACCCCUUUAUUUCUACCA	0.38	2.45	0.155102	tRNA-Ile
GAAAGUGCACUUGGACGAA	0.38	2.45	0.155102	s-rRNA
GCUGAGUGAAGCAUUGGACUG	0.38	2.45	0.155102	tRNA-Tyr
GGUAAAAUGGCUGAGUGAAGCAUUGG	0.38	2.45	0.155102	tRNA-Tyr
UGAAACUUAAGGGUCGAAGGUG	0.38	2.45	0.155102	s-rRNA
AGACGGGCUCACAUCACCCCAU	0.94	6.13	0.153344	tRNA-Phe
CGCCAGAACACUACGAGCCA	0.94	6.13	0.153344	s-rRNA
UGUACUGGAAAGUGCACUUGGACGAA	0.75	4.9	0.153061	s-rRNA
AAAAAAGUAAAAGGAACUCGG	0.56	3.68	0.152174	l-rRNA
AACCAACACCUCUUUACAG	0.56	3.68	0.152174	tRNA-Lys
CAACUGUUCAUCGGCUGAGAGGGCGUA	0.56	3.68	0.152174	ND5
CAGAGAAUGGUUUAAAUUAGA	0.56	3.68	0.152174	tRNA-Pro
AGAGAUGUGUUUAAGUGCUGUGGC	1.69	11.28	0.149823	intergenic
ACCACGAUCAAAAGGGACA	1.32	8.82	0.14966	s-rRNA
UGGUUGUAGUCCGUGCGAGAAU	3.76	25.25	0.148911	tRNA-Glu
UUGUAGUCCGUGCGAGAAUA	4.32	29.17	0.148097	tRNA-Glu
CUUACACUUAGGAGAUUUCAA	2.25	15.2	0.148026	tRNA-Val
CAAGACGAGAAGACCCUAUGGAGCU	0.75	5.15	0.145631	l-rRNA
CAGAGUGUUGCUUAACACAAA	0.75	5.15	0.145631	tRNA-Val
ACUGGAAAGUGCACUUGGACGAAC	1.13	7.84	0.144133	s-rRNA
GUUAAGAUCGCAGAGCCCGG	1.69	11.77	0.143585	tRNA-Leu
UGGUUGUAGUCCGUGCGAGA	1.69	11.77	0.143585	tRNA-Glu
AAAUGGCUGAGUGAAGCAUUGGACUG	0.56	3.92	0.142857	tRNA-Tyr
AACGGCCGCGGUACCCUA	0.56	3.92	0.142857	l-rRNA
AACUAAGUGUUUGUGGGUUA	0.56	3.92	0.142857	tRNA-Asn
AAUUUGACCGCUCUGACCA	0.56	3.92	0.142857	tRNA-Val
AUGGCUGAGUGAAGCAUUGGACUGUA	0.56	3.92	0.142857	tRNA-Tyr
CAGAACACUACGAGCCA	0.56	3.92	0.142857	s-rRNA
CAUAUCAUUGGUCGUGGUU	0.56	3.92	0.142857	tRNA-Glu
GUUAAGAUGGCAGAGCCCGGUAAUCU	0.56	3.92	0.142857	tRNA-Leu
UCACAUCACCCCAUAAACACCA	0.56	3.92	0.142857	tRNA-Phe
AACUUACACUUAGGAGAUUUCA	0.94	6.62	0.141994	tRNA-Val
AAAGAUAAAAUUUGAAAUCUGGU	2.25	15.93	0.141243	intergenic
AAAGGACCUGGCGGUGC	0.38	2.7	0.140741	s-rRNA
AGGGACCUGUAUGAAUGGCUCCAC	0.38	2.7	0.140741	l-rRNA
CAGAACACUACGAGCCACAG	0.38	2.7	0.140741	s-rRNA
CAGAGAAUUGUUUAAAUUAGAA	0.38	2.7	0.140741	tRNA-Pro
CGAAGCAGCGGUGGGCCUAG	0.38	2.7	0.140741	ND4L
CGAGUGAUGUGGGCGAUU	0.38	2.7	0.140741	intergenic
GAAGAGGCGGGCAUGACACA	0.38	2.7	0.140741	l-rRNA
GGCUAAAUCCUAUAUAUCUUACCA	0.38	2.7	0.140741	tRNA-Asp
GGUUGUAGUCCGUGCGAGAAUACC	0.38	2.7	0.140741	tRNA-Glu
UAAAAAUUUCGGUUGGGG	0.38	2.7	0.140741	l-rRNA
GAGAAAGCUCACAAGAACUGCUAA	27.06	192.42	0.14063	tRNA-Ser
UUUAGACGGGCUCACAU	1.13	8.09	0.139679	tRNA-Phe
AGGCCGGAGCAGGAACAGGU	0.75	5.39	0.139147	COX1
GGUGGAUUUAGCAGUAAACUGA	0.75	5.39	0.139147	s-rRNA
GUUAAGAUGGCAGAGCCCGGUAAA	0.75	5.39	0.139147	tRNA-Leu
UGGAAAGUGCACUUGGACG	0.75	5.39	0.139147	s-rRNA
UUGGAUCAGGACAUCCCGAUGGUG	0.94	6.86	0.137026	l-rRNA
GCUUUGGGUGCUAAUGGUGGAGUUAA	3.76	27.45	0.136976	tRNA-Pro
AUACCCUUCCCGUACUACCA	1.5	11.03	0.135993	tRNA-Met
AAGGGCUUGGCUUAAUUAAAGUGGC	0.56	4.17	0.134293	tRNA-Ala
AAGGGUCGAAGGUGGA	0.56	4.17	0.134293	s-rRNA
ACAAAGUAAGCGCAAGUACCCACG	0.56	4.17	0.134293	s-rRNA
ACUUAAGGGUCGAAGGUGGA	0.56	4.17	0.134293	s-rRNA
AUUGUGAAUCUGACAACAG	0.56	4.17	0.134293	tRNA-His
UGCAACUCCAAAUAAAAGUACCA	0.56	4.17	0.134293	tRNA-Leu
UUAAGGGUCGAAGGUGGA	0.56	4.17	0.134293	s-rRNA
GAAUGUUUAGACGGGCUC	4.89	36.52	0.133899	tRNA-Phe
CUUAGUUGAACAGGGCCCU	1.5	11.52	0.130208	s-rRNA
UGGAAAGUGCACUUGGACGAAC	1.5	11.52	0.130208	s-rRNA
AACAGCUAUCCAUUGGUCUUAGCCCCC	1.69	12.99	0.1301	tRNA-Leu
AAGCCGGCGUAAAGAGUG	0.38	2.94	0.129252	s-rRNA
AAGGGCUUGGCUUAAUUAAAGUGGCUGA	0.38	2.94	0.129252	tRNA-Ala
AGUGGAGGCCGGAGCAGGAACAGG	0.38	2.94	0.129252	COX1
AUUUCGACUCAUUAAAUUAUGA	0.38	2.94	0.129252	tRNA-Arg
CAGAGAAUGGUUUAAAUUAGAA	0.38	2.94	0.129252	tRNA-Pro
CGGCUGUGCAGACAUUCAA	0.38	2.94	0.129252	intergenic
GCCGGAGCAGGAACAGGUU	0.38	2.94	0.129252	COX1
GGGGGCAUGAGUUAGCA	0.38	2.94	0.129252	intergenic
GUUAAGAUGGCAGAGCUCGGUAAU	0.38	2.94	0.129252	tRNA-Leu
AGUAAGGUCAGCUAAAUAAGCUAUCGGG	19.92	155.16	0.128384	tRNA-Met
AAAACUCAAAGGACCUGGCGGU	0.75	5.88	0.127551	s-rRNA
GUUAAGAUGGCAGAGCCCGGGA	0.75	5.88	0.127551	tRNA-Leu
UUGUGAAUCUGACAACAGAG	1.5	11.77	0.127443	tRNA-His
AACGAAUGAUUUCGACUCA	0.56	4.41	0.126984	tRNA-Arg
AAGCUCACAAGAACUGCUAACUCAUG	0.56	4.41	0.126984	tRNA-Ser
AAUUUAACUUGACCGCUCUGACCA	0.56	4.41	0.126984	tRNA-Val
CUUAACUUGAUCGCUCUGAC	0.56	4.41	0.126984	tRNA-Val
UACUGGAAAGUGCACUUGGACG	0.56	4.41	0.126984	s-rRNA
ACAGCUAUCCAUUGGUCUUAGCCCCCA	3.38	26.72	0.126497	tRNA-Leu
ACUUACACUUAGGAGAUUUCAA	1.88	14.95	0.125753	tRNA-Val
AAAUGUUUAGACGGGCU	1.32	10.54	0.125237	tRNA-Phe
AAAUAGGGACCUGUAUGAAUGGCU	1.32	10.79	0.122335	l-rRNA
GAGAAAGCUCACAAGAACUGCUA	25.37	208.85	0.121475	tRNA-Ser
AGUAAGGUCAGCUAAAUAAGCUAUCG	2.25	18.63	0.120773	tRNA-Met
AACUUACACUUAGGAGAUUU	0.56	4.66	0.120172	tRNA-Val
AGAGGAGCCUGUUCUGU	0.56	4.66	0.120172	s-rRNA
AGUUGUAAAAAACUCCAGUUGACAC	0.56	4.66	0.120172	s-rRNA
GAGUGAAGCAUUGGACUUU	0.56	4.66	0.120172	tRNA-Tyr
GUUAAGAUGGCAGAGCCCGGUU	0.56	4.66	0.120172	tRNA-Leu
AAAACUCAAAGGACCUGGCGGUGCUUC	0.38	3.19	0.119122	s-rRNA
AACAGCUAUCCAUUGGUCUUA	0.38	3.19	0.119122	tRNA-Leu
ACGUAACUUGACCGCUCUGACCA	0.38	3.19	0.119122	tRNA-Val
AGAGAUGUGUUUAAGUGCUG	0.38	3.19	0.119122	intergenic
AGCAAGACGAGAAGACCCUAUGGAG	0.38	3.19	0.119122	l-rRNA
CACUGUAAAGCUAACUUAGC	0.38	3.19	0.119122	tRNA-Lys
AAGAUGGCAGAGCCCGGUA	1.5	12.75	0.117647	tRNA-Leu
GAGAAAGCUCACAAGAACUGCUAAC	5.83	49.76	0.117162	tRNA-Ser
GUGCAACUCCAAAUAAAAGUACCA	0.94	8.09	0.116193	tRNA-Leu
GUUAAGAUGGCAGAGCUCGGUA	0.94	8.09	0.116193	tRNA-Leu
UAAGGGUCGAAGGUGGAUU	0.94	8.09	0.116193	s-rRNA
AAGGGCUUAGCUUAAUUAAAGUGGCU	1.88	16.42	0.114495	tRNA-Ala
GUUAAGAUAGCAGAGCCCGGUAAU	1.88	16.42	0.114495	tRNA-Leu
ACUUAACUUGACCGCUCUGAC	9.96	87.02	0.114456	tRNA-Val
AUAACCAUGCACACUACUAUA	0.56	4.9	0.114286	ND5
CAACUGUUCAUCGGCUGAGAGGGC	0.56	4.9	0.114286	ND5
CCGGAGCAGGAACAGGUUG	0.56	4.9	0.114286	COX1
ACCACGAUCAAAAGGGACAAGCA	0.75	6.62	0.113293	s-rRNA
CUUAGUUGAACAGGGCC	0.75	6.62	0.113293	s-rRNA
CUUUGGGUGCUAAUGGUGGAGUUAAAG	0.75	6.62	0.113293	tRNA-Pro
AACAGCUAUCCAUUGGUCU	0.38	3.43	0.110787	tRNA-Leu
AUUGUGAAUCUGACAACAGAG	12.97	117.17	0.110694	tRNA-His
AACUUAACUUGACCGCUCUGACC	2.44	22.06	0.110607	tRNA-Val
AUCUGGUUAGGCUGGUGU	2.25	20.35	0.110565	intergenic
ACUAAGUGUUUGUGGGUU	0.94	8.58	0.109557	tRNA-Asn
AACCAACACCUCUUUACAGUG	0.75	6.86	0.109329	tRNA-Lys
GCUUUGGGUGCUAAUGGUGGAGUUAAA	0.56	5.15	0.108738	tRNA-Pro
GCUUUGGUUGCUAAUGGUGGAGUUAA	0.56	5.15	0.108738	tRNA-Pro
GUUGUAGUCCGUGCGAGAAUA	0.56	5.15	0.108738	tRNA-Glu
UCUGGUUAGGCUGGUGUUAGGG	0.56	5.15	0.108738	intergenic
GUUAAAAUGGCAGAGCCCGGUAAU	1.32	12.26	0.107667	tRNA-Leu
UGGUAUAUUGUUUAAACAAAACGAAU	1.13	10.54	0.107211	tRNA-Arg
UCUAACAACAUGGCUUUCUCA	2.07	19.36	0.106921	tRNA-Ser
GUUAAGAUGGCAGAGCCCGGUAAU	53.55	509.62	0.105078	tRNA-Leu
ACUCUUUUGGUAUAAAUAGUACCGU	0.56	5.39	0.103896	tRNA-Gly
ACUUACACUUAGGAGAUUUCAACUU	0.56	5.39	0.103896	tRNA-Val
CAACUUAACUUGACCGUUCUGACCA	0.56	5.39	0.103896	tRNA-Val
UAGGAUGGGGUGUGAUAGGUA	0.94	9.07	0.103638	tRNA-Gln
UGGUUGUAGUCCGUGCGAGAAUAC	1.32	12.75	0.103529	tRNA-Glu
AAAUAAGCUAUCGGGCCC	0.38	3.68	0.103261	tRNA-Met
ACUUCCAAUUAACUAGUUUUGA	0.38	3.68	0.103261	tRNA-Gly
AUGGCAGAGCCCGGUAAUCGCAUA	0.38	3.68	0.103261	tRNA-Leu
GAACAGGGCCCUGAAGCGCG	0.38	3.68	0.103261	s-rRNA
GAGAAGACCCUAUGGAGCUUU	0.38	3.68	0.103261	l-rRNA
GCUUAAACCCCCUUAUUUCUACCA	0.38	3.68	0.103261	tRNA-Ile
GUUAAGAUGGCAGAUCCCGGUAA	0.38	3.68	0.103261	tRNA-Leu
UCUGGUUAGGCUGGUGUUAG	0.38	3.68	0.103261	intergenic
UUAACUUGAUCGCUCUGACCA	0.38	3.68	0.103261	tRNA-Val
GUUAAGAUCGCAGAGCCCGGUAAU	3.01	29.17	0.103188	tRNA-Leu
AACAGCUAUCCAUUGGUCUU	1.5	14.71	0.101971	tRNA-Leu
ACAGCUAUCCAUUGGUCUUAGGCCCCA	2.07	20.59	0.100534	tRNA-Leu
AACAACAUGGCUUUCUCACCA	1.13	11.28	0.100177	tRNA-Ser
GUAAAUAUUGUUUAACCAAAACAUCAG	0.56	5.64	0.0992908	tRNA-His
CAAGACGAGAAGACCCUAUGGAGCUU	0.75	7.6	0.0986842	l-rRNA
CUUAGUUGAACAGGGCCC	0.94	9.56	0.0983264	s-rRNA
UCUGGUUAGGCUGGUGUUAGG	1.13	11.52	0.0980903	intergenic
AGAGAACCAACACCUCUUUACAGUGACCA	3.76	38.48	0.0977131	tRNA-Lys
UGUUUAGACGGGCUCACAUCACCCCA	1.69	17.4	0.0971264	tRNA-Phe
AACAGCUAUCCAUUGGUCUUAGGCCCCA	2.07	21.33	0.0970464	tRNA-Leu
AACUUCCAAUUAACUAGUUUUG	0.38	3.92	0.0969388	tRNA-Gly
ACUUAAGGGUCGAAGGUGGAU	0.38	3.92	0.0969388	s-rRNA
GAAAAUGUUUAGACGGGCUCACAUC	0.38	3.92	0.0969388	tRNA-Phe
GAAGACCCUAUGGAGCU	0.38	3.92	0.0969388	l-rRNA
GCAGAACCCAACCUCCGAGCAGUA	0.38	3.92	0.0969388	l-rRNA
GUUAAGAUGGCAGAGCCCGGAA	0.38	3.92	0.0969388	tRNA-Leu
AAAUAAGCUAUCGGGCCCA	1.32	13.73	0.0961398	tRNA-Met
AAGGUAUUAAAAAAACCA	1.13	11.77	0.0960068	tRNA-Asp
UAGGAUGGGGUGUGAUAGGUGA	1.13	11.77	0.0960068	tRNA-Gln
AAUGUUUAGACGGGCU	2.07	21.57	0.0959666	tRNA-Phe
AAAACUCAAAGGACCUGGCGGUGCUUCA	0.94	9.81	0.0958206	s-rRNA
AAGAUGGCAGAGCCCGGU	0.94	9.81	0.0958206	tRNA-Leu
GAAUGUUUAGACGGGC	0.75	7.84	0.0956633	tRNA-Phe
AAGGACCUGGCGGUGCUUC	0.56	5.88	0.0952381	s-rRNA
ACUUAACUUGACCGUUCUG	3.76	39.96	0.0940941	tRNA-Val
UUUGGGUGCUAAUGGUGGAGUUA	1.13	12.01	0.0940883	tRNA-Pro
AACUGUUCAUCGGCUGAGAGGGCGUA	1.69	18.38	0.0919478	ND5
CCAACACCUCUUUACAGUG	0.56	6.13	0.091354	tRNA-Lys
UACACUGAAAAUGUUUAGACGGGCU	0.56	6.13	0.091354	tRNA-Phe
UUGGUGCAACUCCAAAUAAAAGUACCA	0.56	6.13	0.091354	tRNA-Leu
AAAGAUAAAAUUUGAAAUCUGGUU	0.94	10.3	0.0912621	intergenic
AACGGCCGCGGUACCCU	0.38	4.17	0.0911271	l-rRNA
ACUUAACUUGACCACUCUGACCA	0.38	4.17	0.0911271	tRNA-Val
ACUUAACUUGACUGCUCUGACCA	0.38	4.17	0.0911271	tRNA-Val
AGCUCCGAGGUGAUUUUCAUAUUG	0.38	4.17	0.0911271	tRNA-Cys
UUAACUUGACCGCUCUGACC	0.38	4.17	0.0911271	tRNA-Val
CAUAUCAUUGGUCGUGGUUG	0.75	8.33	0.090036	tRNA-Glu
CGGAGCAGGAACAGGUUG	1.5	16.67	0.089982	COX1
GUUUAUGUUGCUUACCUCCU	0.94	10.54	0.0891841	tRNA-Phe
GAAUGUUUAGACGGGCU	3.95	44.37	0.0890241	tRNA-Phe
AAUGUUUAGACGGGCUC	2.07	23.29	0.0888793	tRNA-Phe
UAGGAUGGGGUGUGAUAGA	0.56	6.37	0.0879121	tRNA-Gln
GGUUGUAGUCCGUGCGAGAAUACCA	3.01	34.32	0.087704	tRNA-Glu
GAAUGUUUAGACGGGCUCAC	3.38	38.73	0.0872708	tRNA-Phe
ACAGCUAUCCAUUGGUCUUAGCCCCC	0.94	10.79	0.0871177	tRNA-Leu
ACACAUGUUUAACGGCCGCGG	0.38	4.41	0.0861678	l-rRNA
AGAAGACCCUAUGGAGCUUU	0.38	4.41	0.0861678	l-rRNA
GUAGUCCGUGCGAGAAUA	0.38	4.41	0.0861678	tRNA-Glu
GUUUAGACGGGCUCACAU	2.63	30.64	0.0858355	tRNA-Phe
GAGAAAGCUCACAAGAACUGC	5.07	59.08	0.0858158	tRNA-Ser
AACAGCUAUCCAUUGGUCUUAGCCCCCA	2.07	24.27	0.0852905	tRNA-Leu
UGGUUGUAGUCCGUGCGAG	0.75	8.82	0.085034	tRNA-Glu
ACUCUUUUUGUAUAAAUAGUACCGU	0.56	6.62	0.0845921	tRNA-Gly
AUGGCACAUGCAGCGCAAGUAGGUCUA	1.5	17.89	0.0838457	COX2
ACGACCUCGAUGUUGGAUCAGGACA	0.75	9.07	0.0826902	l-rRNA
UUAUACCCUUCCCGUACUACCA	0.75	9.07	0.0826902	tRNA-Met
UUUAGACGGGCUCACA	0.75	9.07	0.0826902	tRNA-Phe
AGUUGAUUAGGGUGCUUAG	0.56	6.86	0.0816327	tRNA-Asn
GAGAAAGCUCACAAGAA	1.32	16.18	0.0815822	tRNA-Ser
AACAUGGCUUUCUCACCA	0.38	4.66	0.0815451	tRNA-Ser
ACACCUCUUUACAGUGACCA	0.38	4.66	0.0815451	tRNA-Lys
CAACUUAACUUGACCGCUC	0.38	4.66	0.0815451	tRNA-Val
GAGAAAGCUCACAAGAACUGCUAAA	0.38	4.66	0.0815451	tRNA-Ser
UUGUAGUCCGUGCGAGAAUACC	0.38	4.66	0.0815451	tRNA-Glu
AACUUAACUUGACCGCUCUGA	2.07	25.49	0.0812083	tRNA-Val
AUGAAACUUAAGGGUCGAAGGUG	0.75	9.31	0.0805585	s-rRNA
ACUUAACUUGACCGCUCUGAA	12.59	156.39	0.0805039	tRNA-Val
GUUGUAGUCCGUGCGAGAAUACCA	3.76	47.31	0.0794758	tRNA-Glu
AACUUGACCGCUCUGACC	0.56	7.11	0.0787623	tRNA-Val
AUUGUGAAUCUGACAACAGAGGCU	0.56	7.11	0.0787623	tRNA-His
GGUUGUAGUCCGUGCGAGAAUA	0.56	7.11	0.0787623	tRNA-Glu
UAGGAUGGUGUGUGAUAGGUGGCACGGAGA	0.75	9.56	0.0784519	tRNA-Gln
UAAGGGUCGAAGGUGGAU	1.13	14.46	0.0781466	s-rRNA
GAAAAUGUUUAGACGGGCU	7.89	101.48	0.0777493	tRNA-Phe
AACUUGACCGCUCUUACCA	0.38	4.9	0.077551	tRNA-Val
ACUUAACUUGACCGCCCUGACCA	0.38	4.9	0.077551	tRNA-Val
UACUUCUCCCGCCGCCGGGA	0.38	4.9	0.077551	intergenic
AACUUGACCGCUCUGAC	0.19	2.45	0.077551	tRNA-Val
ACUUAACUUGACCGCUCUAACCA	0.19	2.45	0.077551	tRNA-Val
AUCAUUGGUCGUGGUUGUAG	0.19	2.45	0.077551	tRNA-Glu
AUGAAUCUGAGGAGGCUA	0.19	2.45	0.077551	CYTB
AUGUUUAGACGGGCUCAA	0.19	2.45	0.077551	tRNA-Phe
CGUGAAGAGGCGGGCAUG	0.19	2.45	0.077551	l-rRNA
CUGAAAAUGUUUAGACGGGCUCA	0.19	2.45	0.077551	tRNA-Phe
CUUAAAUCCCCUUAUUUCUACCA	0.19	2.45	0.077551	tRNA-Ile
GCAAGACGAGAAGACCCUAUGG	0.19	2.45	0.077551	l-rRNA
GUUAAGAUGGCAGAGCCCGGGAAU	0.19	2.45	0.077551	tRNA-Leu
GUUAAGAUGGCAGAGCCCGGUAU	0.19	2.45	0.077551	tRNA-Leu
GUUAAGAUGGCAGAGCCUGGUAAUCG	0.19	2.45	0.077551	tRNA-Leu
GUUGUAGUCCGUGCGAGAAU	0.19	2.45	0.077551	tRNA-Glu
CUUUGGGUGCUAAUGGUGGAGU	0.94	12.26	0.0766721	tRNA-Pro
GAAAAAGUCAUGGAGGCCAUGGGGUU	0.94	12.26	0.0766721	tRNA-Ser
AACUUAACUUGACCGCUCUGAA	0.75	9.81	0.0764526	tRNA-Val
AAGGGCUUGGCUUAAUUAAAGUGGCU	0.56	7.35	0.0761905	tRNA-Ala
AAAAAAGUAAAAGGAACUCGGCA	2.25	29.91	0.0752257	l-rRNA
AUGUUUAGACGGGCUC	6.01	79.91	0.0752096	tRNA-Phe
ACUUCCAAUUAACUAGUUUUG	0.75	10.05	0.0746269	tRNA-Gly
GCUAUUAAAGGUUCGUUUGU	7.7	103.44	0.0744393	l-rRNA
AACUUAACUUGACCGCUCUGACA	0.38	5.15	0.0737864	tRNA-Val
AUGAUAGGGGAAGUAGCGUCUUGU	0.38	5.15	0.0737864	intergenic
CAGAGAAUGGUUUAAAUUAGAAUCUU	0.38	5.15	0.0737864	tRNA-Pro
CCUGCAUUAAAAAUUUCGGUUGGG	0.38	5.15	0.0737864	l-rRNA
GCCAGAACACUACGAGCCA	0.38	5.15	0.0737864	s-rRNA
CAACUCCAAAUAAAAGUACCA	0.56	7.6	0.0736842	tRNA-Leu
UCUAACAACAUGGCUUUCU	0.56	7.6	0.0736842	tRNA-Ser
AUGUUUAGACGGGCUCACA	3.57	50.01	0.0713857	tRNA-Phe
UGUAGUCCGUGCGAGAAUACCA	2.82	39.96	0.0705706	tRNA-Glu
UGUUUAGACGGGCUCACAU	7.52	106.63	0.0705242	tRNA-Phe
ACUUAACUUGAUCGCUCUG	0.38	5.39	0.0705009	tRNA-Val
ACUUGAUCGCUCUGACCA	0.38	5.39	0.0705009	tRNA-Val
AGUAAGGUCAGCUAAAUAAGCUAUCGUG	0.38	5.39	0.0705009	tRNA-Met
CAGAGAAUAGUUUAAAUUAGAAUCUUAG	0.38	5.39	0.0705009	tRNA-Pro
UUGUGAAUCUGACAACAGAGGCUUA	0.38	5.39	0.0705009	tRNA-His
AAAAAUUUCGGUUGGGGC	0.19	2.7	0.0703704	l-rRNA
AAGAAAUGGGCUACAUUUU	0.19	2.7	0.0703704	s-rRNA
AAGGACCUGGCGGUGCUUCAU	0.19	2.7	0.0703704	s-rRNA
ACAACAUGGCUUUCUCACUA	0.19	2.7	0.0703704	tRNA-Ser
ACUCUUUUAGUAUAAAUAGUACCGU	0.19	2.7	0.0703704	tRNA-Gly
ACUUAACUUAACCGCUCUGACCA	0.19	2.7	0.0703704	tRNA-Val
ACUUAACUUCACCGCUCUGACCA	0.19	2.7	0.0703704	tRNA-Val
ACUUAACUUGACCGCUCUGACCU	0.19	2.7	0.0703704	tRNA-Val
AGAAGACCCUAUGGAGCU	0.19	2.7	0.0703704	l-rRNA
AGAUGGCAGAGCCCGGUAAUCGCAUAA	0.19	2.7	0.0703704	tRNA-Leu
AGGACCUGGCGGUGCUUCA	0.19	2.7	0.0703704	s-rRNA
AUCAUUGGUCGUGGUUG	0.19	2.7	0.0703704	tRNA-Glu
CAACUUAACUUGACCGCUCUGA	0.19	2.7	0.0703704	tRNA-Val
CAGCUAAAUAAGCUAUCGGGCCCA	0.19	2.7	0.0703704	tRNA-Met
CUAACCUGAAUCGGAGGACA	0.19	2.7	0.0703704	CYTB
GAAAAAGUCAUGGAGGCCA	0.19	2.7	0.0703704	tRNA-Ser
GAAAAUGUUUAGACGGGCA	0.19	2.7	0.0703704	tRNA-Phe
GAGAAAGCUCACAAGAACUGCUAACUAA	0.19	2.7	0.0703704	tRNA-Ser
GAGGUGGCAAGAAAUGGGCU	0.19	2.7	0.0703704	s-rRNA
GUUAAGAUGGCAGAGCCCGGUAAUUG	0.19	2.7	0.0703704	tRNA-Leu
GUUAAGAUGGCAGAGUCCGGUAAU	0.19	2.7	0.0703704	tRNA-Leu
UGGUAUAUGGUUUAAACAAAAC	0.19	2.7	0.0703704	tRNA-Arg
UGUGAAUCUGACAACAGAGGCU	0.19	2.7	0.0703704	tRNA-His
UUGUAGUUCGUGCGAGAAUACCA	0.19	2.7	0.0703704	tRNA-Glu
AAAAUGUUUAGACGGGCUCAC	1.32	18.87	0.0699523	tRNA-Phe
AACUGUUCAUCGGCUGAGAGGGC	1.69	24.27	0.0696333	ND5
ACACAUGUUUAACGGCCGCGGUA	0.56	8.09	0.0692213	l-rRNA
CAGAGUGUUGCUUAACACAAAGCA	0.56	8.09	0.0692213	tRNA-Val
ACUUAACUUGACCGCUCUG	32.7	472.85	0.0691551	tRNA-Val
CAGAGUGUUGCUUAACACAAAGCACC	0.75	11.03	0.0679964	tRNA-Val
UAAAGACGUUAGGUCAAGGUGUAGC	0.38	5.64	0.0673759	s-rRNA
CUGCAUUAAAAAUUUCGGUUGGG	1.69	25.25	0.0669307	l-rRNA
GAAAAUGUUUAGACGGGC	1.5	22.55	0.0665188	tRNA-Phe
AAGCGAGGUUGACCUGU	0.75	11.28	0.0664894	intergenic
AAAAAAAGUAAAAGGAACUCGGCA	3.38	50.99	0.0662875	l-rRNA
CACUGUAAAGCUAACUUAG	1.32	20.1	0.0656716	tRNA-Lys
AACUUAACUUGACCGCUCUG	6.39	98.54	0.0648468	tRNA-Val
AACCAACACCUCUUUACAGUGACUA	0.38	5.88	0.0646259	tRNA-Lys
GCCGGAGCAGGAACAGGUUG	0.38	5.88	0.0646259	COX1
UGUUUAGACGGGCUCAA	0.38	5.88	0.0646259	tRNA-Phe
AAAGAUAAAAUUUGAAAUCUGGUUA	0.19	2.94	0.0646259	intergenic
AACAGCUAUCCAUUGGUCUUAGCCCCCAA	0.19	2.94	0.0646259	tRNA-Leu
AACUUCCAAUUAACUAGUUUUGA	0.19	2.94	0.0646259	tRNA-Gly
AAGCUCACAAGAACUGCUAACUCAUGC	0.19	2.94	0.0646259	tRNA-Ser
AGCUAUCCAUUGGUCUUAGCCCCC	0.19	2.94	0.0646259	tRNA-Leu
AGGAACAGCUCUUUGGACAC	0.19	2.94	0.0646259	l-rRNA
AGGUUAGAAUGAGGAGGUC	0.19	2.94	0.0646259	intergenic
CAAAGGACCUGGCGGUGCUUCA	0.19	2.94	0.0646259	s-rRNA
CACUGUAACGCUAACUUAGCAU	0.19	2.94	0.0646259	tRNA-Lys
GUUAAGAUAGCAGAGCCCG	0.19	2.94	0.0646259	tRNA-Leu
GUUCAUCGGCUGAGAGGGCGUA	0.19	2.94	0.0646259	ND5
UAAAUACAGACCAAGAGCCUUC	0.19	2.94	0.0646259	tRNA-Trp
UAGGAUGGCGUGUGAU	0.19	2.94	0.0646259	tRNA-Gln
UGUAAAAAACUCCAGUUGACAC	0.19	2.94	0.0646259	s-rRNA
UUCAUAUCAUUGGUCGUGGUUGUA	0.19	2.94	0.0646259	tRNA-Glu
CAGAGAAUUGUUUAAAUUAGAAUCUUAG	0.94	14.71	0.0639021	tRNA-Pro
AAAAUGUUUAGACGGGCUC	3.57	56.38	0.0633203	tRNA-Phe
AUUUCCUCUUCUUAACACCA	0.94	14.95	0.0628763	tRNA-Leu
CUUACACUUAGGAGAUUUCA	0.94	14.95	0.0628763	tRNA-Val
UGGUUGUAGUCCGUGCGAGAAUA	4.32	69.13	0.062491	tRNA-Glu
AAAAAAAGUAAAAGGAACUCGGC	1.88	30.15	0.0623549	l-rRNA
GAGAAAGCUCACAAGAACUGCUAACA	0.38	6.13	0.0619902	tRNA-Ser
UGAGUGAAGCAUUGGACUGUA	0.38	6.13	0.0619902	tRNA-Tyr
UGAGUGAAGCAUUGGACUUU	0.38	6.13	0.0619902	tRNA-Tyr
ACUUUUAAGGGAUAACAGCUAU	0.94	15.2	0.0618421	tRNA-Leu
CUUAACUUGACCGCUAUGACCA	0.56	9.07	0.061742	tRNA-Val
UGGUUGUAGUCCGUGCGA	0.56	9.07	0.061742	tRNA-Glu
UGUACUGGAAAGUGCACUUGGACGAAC	1.13	18.63	0.0606549	s-rRNA
ACUUAACGUGACCGCUCUGACCA	0.56	9.31	0.0601504	tRNA-Val
CUGAUGUUCGCCGACCGUUGA	0.56	9.31	0.0601504	intergenic
UGGUAUAUGGUUUAAACAAAACGAAU	0.56	9.31	0.0601504	tRNA-Arg
GUGGUUGUAGUCCGUGCGAGAAUACCA	11.65	195.12	0.0597068	tRNA-Glu
CAGAGUGUAGCUUAACACAAAGCACUC	0.38	6.37	0.0596546	tRNA-Val
GAGAUUUCAACUUAACUUGACCGCUCUGA	0.38	6.37	0.0596546	tRNA-Val
ACUUAACUUGACCGGUCUGACCA	0.19	3.19	0.0595611	tRNA-Val
AGAGGAGCCUGUUCUGUAA	0.19	3.19	0.0595611	s-rRNA
AGGGUUUACGACCUCGAUGUUGG	0.19	3.19	0.0595611	l-rRNA
CAAUACUUAAUUUCUGACA	0.19	3.19	0.0595611	tRNA-Trp
CACAUGUUUAACGGCCGCGGUA	0.19	3.19	0.0595611	l-rRNA
CCCCUAUCUGAGGGGGG	0.19	3.19	0.0595611	intergenic
CUCGAUGUUGGAUCAGGACA	0.19	3.19	0.0595611	l-rRNA
CUUAACUUGACCGCUCUGACCG	0.19	3.19	0.0595611	tRNA-Val
GAGGGCGUGAUCAUGAAAGGUG	0.19	3.19	0.0595611	intergenic
GAUGUGUUUAAGUGCUGUGGC	0.19	3.19	0.0595611	intergenic
GAUUGUGAAUCUGACAACAGAGGCUU	0.19	3.19	0.0595611	tRNA-His
GCCAGAACACUACGAGCCACA	0.19	3.19	0.0595611	s-rRNA
UAGGAUGGAGUGUGAUAGGUGGCACGGAGA	0.19	3.19	0.0595611	tRNA-Gln
UGAAAAUGUUUAGACGGGCU	0.19	3.19	0.0595611	tRNA-Phe
UGAAAAUGUUUAGACGGGCUCA	0.19	3.19	0.0595611	tRNA-Phe
UGGGUGUAGUCCGUGCGAGAAUACCA	0.19	3.19	0.0595611	tRNA-Glu
UUGUAAAAAACUCCAGUUGACACA	0.19	3.19	0.0595611	s-rRNA
UUUAACUUGACCGCUCUG	0.19	3.19	0.0595611	tRNA-Val
UUUAUACUACAAGGACAGGCC	0.19	3.19	0.0595611	intergenic
UUUGGGUGCUAAUGGUGGAGUUAAA	0.19	3.19	0.0595611	tRNA-Pro
ACAGCUAUCCAUUGGUCUU	2.82	47.55	0.059306	tRNA-Leu
CUUAACUUGACCGCGCUGACCA	1.13	19.12	0.0591004	tRNA-Val
AUGUUUAGACGGGCUCA	4.32	73.54	0.0587435	tRNA-Phe
CUUUUUCCAAGGACACCA	2.82	48.53	0.0581084	tRNA-Thr
AAGGACCUGGCGGUGCUUCA	2.07	35.79	0.0578374	s-rRNA
ACUUAACUUGACCGCUCUGACA	0.75	12.99	0.0577367	tRNA-Val
GAACAGGGCCCUGAAGCGCGU	0.75	12.99	0.0577367	s-rRNA
AGUAAGGUCAGCUAAAUAAGCUAUCGG	2.07	36.03	0.0574521	tRNA-Met
AACUUAACUUGACCGCU	0.38	6.62	0.0574018	tRNA-Val
ACAGCUAUCCAUUGGUCUUAGGCCCCAA	0.38	6.62	0.0574018	tRNA-Leu
ACUUUUAAAGGAUAACAGCUAU	0.38	6.62	0.0574018	tRNA-Leu
AGAAAUUUUGGUUAAAUACAGACCAAG	0.38	6.62	0.0574018	tRNA-Trp
GAGAAAGCUCACAAGAACUGCUAACU	7.7	135.31	0.0569064	tRNA-Ser
CAGAACCCAACCUCCGAGCAGUA	6.39	112.51	0.056795	l-rRNA
AUUGUGAAUCUGACAACAGAGG	3.38	59.57	0.05674	tRNA-His
AACUGCUAACUCAUGCCCCCAUG	0.56	10.05	0.0557214	tRNA-Ser
GUUAUACCCUUCCCGUACUACCA	0.56	10.05	0.0557214	tRNA-Met
GAAAAUGUUUAGACGGGCUC	4.89	88	0.0555682	tRNA-Phe
AACUUGACCGCUCUGACUA	0.38	6.86	0.0553936	tRNA-Val
CAACAUUCAAAAAAGAGUACUA	0.38	6.86	0.0553936	tRNA-Gly
AAAUAGGGACCUGUAUGAAUGGC	0.19	3.43	0.0553936	l-rRNA
AACAGCUAUCCAUUGG	0.19	3.43	0.0553936	tRNA-Leu
AAUUAUGAUAAUCAUAUUUACCAACCA	0.19	3.43	0.0553936	tRNA-Arg
CAAGACGAGAAGACCCUAUGGA	0.19	3.43	0.0553936	l-rRNA
CACCAGUAUUAGAGGCACCG	0.19	3.43	0.0553936	l-rRNA
CUGAUGUUCGCCGACCGU	0.19	3.43	0.0553936	intergenic
CUUAAACCUCCUUAUUUCUACCA	0.19	3.43	0.0553936	tRNA-Ile
CUUAAUUUGACCGCUCUG	0.19	3.43	0.0553936	tRNA-Val
CUUAAUUUGACCGCUCUGAC	0.19	3.43	0.0553936	tRNA-Val
CUUUGGCUGCUAAUGGUGGAGUUA	0.19	3.43	0.0553936	tRNA-Pro
GAAUAUGUUUAGACGGGCUC	0.19	3.43	0.0553936	tRNA-Phe
GAGAAAGCUCACAAGAAC	0.19	3.43	0.0553936	tRNA-Ser
GCUAAACCUAGCCCCAAACCCAC	0.19	3.43	0.0553936	l-rRNA
GUGAAGCAUUGGACUGUA	0.19	3.43	0.0553936	tRNA-Tyr
GUGGUUGUAGUCCGUGCG	0.19	3.43	0.0553936	tRNA-Glu
GUUCAUUUCCUCUUCUUAACACCA	0.19	3.43	0.0553936	tRNA-Leu
UAGUCCGUGCGAGAAUACC	0.19	3.43	0.0553936	tRNA-Glu
UGUCUGUGUGGAAAGCGG	0.19	3.43	0.0553936	intergenic
UUUGGUUGCUAAUGGUGGAGUUA	0.19	3.43	0.0553936	tRNA-Pro
ACUUAACUUGACCGCUC	2.07	37.5	0.0552	tRNA-Val
AAAAUGUUUAGACGGGCU	3.19	58.09	0.0549148	tRNA-Phe
UCUGGUUAGGCUGGUGU	5.64	103.2	0.0546512	intergenic
GAUUGUGAAUCUGACAACAGAGGCUUA	0.56	10.3	0.0543689	tRNA-His
CAUUAAAAAUUUCGGUUGG	0.38	7.11	0.0534459	l-rRNA
UUAACUUGACCGCUCUGACCA	7.89	148.06	0.0532892	tRNA-Val
UAGGAUGGGGUGUGAU	7.14	134.57	0.0530579	tRNA-Gln
GUUUAGACGGGCUCACA	1.13	21.57	0.0523876	tRNA-Phe
ACUUUUAAUGGAUAACAGCUAU	0.56	10.79	0.0518999	tRNA-Leu
CAGAGUGUUGCUUAACACAA	0.38	7.35	0.0517007	tRNA-Val
AAAACUCAAAGGACCUGGC	0.19	3.68	0.0516304	s-rRNA
AAGGUAUUAGAAAAACCAUUU	0.19	3.68	0.0516304	tRNA-Asp
AAUACUUAAUUUUUGCCA	0.19	3.68	0.0516304	tRNA-Trp
AGGAACAGCUCUUUGGACA	0.19	3.68	0.0516304	l-rRNA
CACAAGAACUGCUAACUCAUGC	0.19	3.68	0.0516304	tRNA-Ser
GUGGUUGUAGUCCGUGCGAGAAUACC	0.19	3.68	0.0516304	tRNA-Glu
GUUAAGAUGGCAGAGCUCGGUAAUCG	0.19	3.68	0.0516304	tRNA-Leu
UGCUUAGUUGAACAGGGCCC	0.19	3.68	0.0516304	s-rRNA
CACUGUAAGGCUAACUUAG	2.82	54.91	0.0513568	tRNA-Lys
UCUAACAACAUGGCUUUCUC	0.56	11.03	0.0507706	tRNA-Ser
AACUUAACUUGACCGCUCUGACCA	43.97	866.52	0.0507432	tRNA-Val
UGUUUAGACGGGCUCACA	6.2	124.03	0.0499879	tRNA-Phe
UAGGAUGGGGUGUGAUAGGUGGCACGGAG	16.35	327.98	0.0498506	tRNA-Gln
AAAUGUUUAGACGGGCUC	0.56	11.28	0.0496454	tRNA-Phe
CCCGGUAAUCGCAUAAAACUUA	0.56	11.52	0.0486111	tRNA-Leu
CUUAACUUGAUCGCUCUG	0.75	15.44	0.0485751	tRNA-Val
AAGGGCUUAGCUUAAUUAAAGUG	0.38	7.84	0.0484694	tRNA-Ala
CAACUUAACUUGACCGCUCU	0.38	7.84	0.0484694	tRNA-Val
CGUAAAGACGUUAGGUCAAGGUGUAGC	0.38	7.84	0.0484694	s-rRNA
GAAGCGAGGUUGACCUGU	0.38	7.84	0.0484694	intergenic
AAACAAAACGAAUGAUUUCGACUCAU	0.19	3.92	0.0484694	tRNA-Arg
AAAUGUUUAGACGGGCUCA	0.19	3.92	0.0484694	tRNA-Phe
ACAACAUUCAAAAAAGAGUACC	0.19	3.92	0.0484694	tRNA-Gly
ACUUAACUUGACCGCGCUGACCA	0.19	3.92	0.0484694	tRNA-Val
ACUUAACUUGACCGCUCGGACCA	0.19	3.92	0.0484694	tRNA-Val
AGUGUACUGGAAAGUGCACUUGGACGAAC	0.19	3.92	0.0484694	s-rRNA
AUAAUCAUAUUUACCAAA	0.19	3.92	0.0484694	intergenic
CUUAACUUGAUCGCUCUGACC	0.19	3.92	0.0484694	tRNA-Val
ACUUAACUUGACCGCUCUGACC	4.7	97.31	0.0482992	tRNA-Val
AGGCCGGAGCAGGAACAGGUU	0.56	11.77	0.0475786	COX1
UGCAUUAAAAAUUUCGGUUGGG	2.25	47.55	0.0473186	l-rRNA
ACUUAACUUGACCGCUCUGAUCA	0.75	15.93	0.047081	tRNA-Val
AACUGCUAACUCAUGCCCCCAU	0.38	8.09	0.0469716	tRNA-Ser
AACUUAACUUGACCGCUCUGACUA	0.38	8.09	0.0469716	tRNA-Val
CUUUGGGUGCUAAUGGUGGAGUUA	7.14	152.47	0.0468289	tRNA-Pro
AAUCUGGUUAGGCUGGUGU	0.75	16.18	0.0463535	intergenic
CUUAACUUGACCGCUCUCACCA	0.75	16.18	0.0463535	tRNA-Val
UGUUUAGACGGGCUCAC	5.45	117.66	0.0463199	tRNA-Phe
AUUGUGAAUCUGACAACAGAGGCUU	1.13	24.51	0.0461036	tRNA-His
ACUUAACUUGACCGCU	1.5	32.6	0.0460123	tRNA-Val
GAGAACCAACACCUCUUUACAGUGACCA	0.56	12.26	0.045677	tRNA-Lys
GCAAUACUUAAUUUCUGUCA	0.38	8.33	0.0456182	tRNA-Trp
AAGGACCUGGCGGUGCUU	0.19	4.17	0.0455635	s-rRNA
AAGUAUAGGCGAUAGAAAUUG	0.19	4.17	0.0455635	l-rRNA
CUUAACUUGACCGUUCU	0.19	4.17	0.0455635	tRNA-Val
CUUAACUUGAUCGCUCU	0.19	4.17	0.0455635	tRNA-Val
GAGAACCAGCACCUCUUUACAGUGACCA	0.19	4.17	0.0455635	tRNA-Lys
UGUGAAUCUGACAACAGAGGCUU	0.19	4.17	0.0455635	tRNA-His
UUGGGUGCUAAUGGUGGAGUUAA	0.19	4.17	0.0455635	tRNA-Pro
ACUUAACUUGACCGCUCU	13.34	293.17	0.0455026	tRNA-Val
CUUAACUUGACCGUUCUG	1.5	33.09	0.0453309	tRNA-Val
GAAAAUGUUUAGACGGGCUCAC	4.32	95.6	0.0451883	tRNA-Phe
ACUUAACUUGACCGUUCUGA	0.94	20.84	0.0451056	tRNA-Val
CAGAGUGUGGCUUAACACAAAGCACCCAA	0.75	16.67	0.044991	tRNA-Val
CUUAACUUGACCGCUCUGACA	0.56	12.5	0.0448	tRNA-Val
CAACGUUGUAGGCCCCUACGGGC	0.38	8.58	0.044289	ND1
CUCAACUUGACCGCUCUGACCA	0.38	8.58	0.044289	tRNA-Val
ACUUAACUUGACCUCUCUGACCA	1.69	38.97	0.0433667	tRNA-Val
GAGAAAGCUCACAAGAACUG	7.52	173.79	0.0432706	tRNA-Ser
ACUUUUAAGGGAUAACAGCUA	0.19	4.41	0.0430839	tRNA-Leu
ACUUUUAAUGGAUAACAGCUA	0.19	4.41	0.0430839	tRNA-Leu
CAGAGAAUGGUUUAAAUUAGAAU	0.19	4.41	0.0430839	tRNA-Pro
CAGAGUGUCGCUUAACACAAAGCACCCAA	0.19	4.41	0.0430839	tRNA-Val
GAAGAGGCGGGCAUGACACAG	0.19	4.41	0.0430839	l-rRNA
UUGUAAAAAACUCCAGUUGAC	0.19	4.41	0.0430839	s-rRNA
ACUUGACCGCUCUGACCA	7.14	166.44	0.0428983	tRNA-Val
UAGGAUGGGGUGUGAUAGGUGGCACGGAGA	5.07	118.64	0.0427343	tRNA-Gln
CACUGUAAUGCUAACUUAGCAUUAACCUU	0.75	17.65	0.0424929	tRNA-Lys
GUUAAGAUGGCAGAGCCC	0.56	13.24	0.0422961	tRNA-Leu
AACUUAACUUGACCGUUCUGACCA	1.13	26.72	0.0422904	tRNA-Val
CAGAGUGUUGCUUAACACAAAGCACCCAA	2.82	66.92	0.0421399	tRNA-Val
AAGACGAGAAGACCCUAUGGAGCUU	0.38	9.07	0.0418964	l-rRNA
ACUUAACUUGACCGUUCUGACC	0.38	9.07	0.0418964	tRNA-Val
AUGUUUAGACGGGCUCAC	5.07	121.83	0.0416154	tRNA-Phe
CUUAACUUGACCGCCCUGACCA	0.56	13.48	0.041543	tRNA-Val
UUAACUUGACCGUUCUGACCA	0.75	18.14	0.0413451	tRNA-Val
AUAAUCAUAUUUACCAA	1.5	36.52	0.0410734	tRNA-Arg
CUUAACUUGACCGUUCUGAC	0.94	23.04	0.0407986	tRNA-Val
CACUGUAAUGCUAACUUAG	1.32	32.36	0.0407911	tRNA-Lys
ACUUAACUUGACCGUUCU	0.19	4.66	0.0407725	tRNA-Val
AUAUCAUUGGUCGUGGUUG	0.19	4.66	0.0407725	tRNA-Glu
AUUGUGAAUCUGACAACAGAGA	0.19	4.66	0.0407725	tRNA-His
CAGAGAAUUGUUUAAAUUAGAAUCUU	0.19	4.66	0.0407725	tRNA-Pro
CAGAGUGGGGUUUUGCAGUC	0.19	4.66	0.0407725	tRNA-Ala
CAUUAAAAAUUUCGGUUG	0.19	4.66	0.0407725	l-rRNA
CUGCUAACUCAUGCCCCCAUG	0.19	4.66	0.0407725	tRNA-Ser
CUUAACGUGACCGCUCUGACCA	0.19	4.66	0.0407725	tRNA-Val
UUGACCGCUCUGACCA	0.19	4.66	0.0407725	tRNA-Val
CUUAAACCCCCUUAUUUCUACCA	3.19	79.18	0.040288	tRNA-Ile
CUUUGGGUGCUAAUGGUGGAGUUAA	2.63	65.45	0.0401833	tRNA-Pro
AACUUAACUUGACCUCUCUGACCA	0.38	9.56	0.039749	tRNA-Val
AAAAAAGUAAAAGGAACUCGGC	0.75	18.87	0.0397456	l-rRNA
CUUUGGUUGCUAAUGGUGGAGUUA	0.94	23.78	0.039529	tRNA-Pro
UGUUUAGACGGGCUCA	4.89	123.79	0.0395024	tRNA-Phe
AACCAACACCUCUUUACAGUGA	0.19	4.9	0.0387755	tRNA-Lys
AACGUUGUAGGCCCCUACGGGC	0.19	4.9	0.0387755	ND1
AACUUAACUUGACCGCUC	0.19	4.9	0.0387755	tRNA-Val
AACUUAAUUUGACCGCUCUGACCA	0.19	4.9	0.0387755	tRNA-Val
ACUUAAUUUGACCGCUCUG	0.19	4.9	0.0387755	tRNA-Val
CAGAGUGUUGCUUAACACAAAGCAC	0.19	4.9	0.0387755	tRNA-Val
GACGGCAUCUACGGCUCA	0.19	4.9	0.0387755	COX3
GAGAAAGCUCACAAGAACUGCUAACUCAU	0.19	4.9	0.0387755	tRNA-Ser
UGGGUGCUAAUGGUGGAGUUA	0.19	4.9	0.0387755	tRNA-Pro
ACUUAACUUGACCGCUCUUACCA	1.32	34.07	0.0387438	tRNA-Val
AUUGUGAAUCUGACAACAGAGGC	0.75	19.36	0.0387397	tRNA-His
UUUGUCAAAGUUAAAUUAUAGGCU	0.38	9.81	0.038736	tRNA-Asp
AAAGGACCUGGCGGUGCUUCAU	0.38	10.05	0.0378109	s-rRNA
AGAUGGCAGAGCCCGGUAAUCGCAUA	0.38	10.05	0.0378109	tRNA-Leu
AACUUGACCGCUCUGACCA	17.48	465	0.0375914	tRNA-Val
CUUUGGGUGCUAAUGGUGGAGUUAAA	0.38	10.3	0.0368932	tRNA-Pro
ACUUUUAAUGGAUAACAGCUAUCCAUUGG	0.19	5.15	0.0368932	tRNA-Leu
AGAGAACCAGCACCUCUUUACAGUGACCA	0.19	5.15	0.0368932	tRNA-Lys
GCUUUGGGUGCUAAUGGUGGAGUUA	0.19	5.15	0.0368932	tRNA-Pro
UAAGUGUUUGUGGGUUA	0.19	5.15	0.0368932	tRNA-Asn
GUCUAACAACAUGGCUUUCUCACCA	0.56	15.2	0.0368421	tRNA-Ser
AACUUAACUUGACCGCUCU	2.82	77.7	0.0362934	tRNA-Val
CUUAACUUGACCGCUCUGAC	7.14	198.31	0.0360042	tRNA-Val
AUUGUGAAUCUGACAACAGAGGCUUA	2.82	79.42	0.0355074	tRNA-His
AUACUUAAUUUCUGCAAC	0.19	5.39	0.0352505	intergenic
CAUAAUCGGAGGCUUUGGCAAC	0.19	5.39	0.0352505	COX1
GUGCUGUGGCCAGAAGCG	0.19	5.39	0.0352505	intergenic
UUAACUUGACCGCUCUGAA	0.19	5.39	0.0352505	tRNA-Val
UUGGGUGCUAAUGGUGGAGUUA	0.19	5.39	0.0352505	tRNA-Pro
CAACAUGGCUUUCUCACCA	0.75	21.57	0.0347705	tRNA-Ser
UAAAAAUUUCGGUUGGG	12.97	378.96	0.0342252	l-rRNA
GAAAAAGUCAUGGAGGCCAUGGGGUUG	5.26	153.94	0.0341692	tRNA-Ser
AACUUGAUCGCUCUGACCA	0.38	11.28	0.0336879	tRNA-Val
AGUUGCAAUACUUAAUUUCUUCCA	0.19	5.64	0.0336879	tRNA-Trp
GUUUAUGUAGCUUACCUCCU	0.19	5.64	0.0336879	tRNA-Phe
UAGUCCGUGCGAGAAUA	0.19	5.64	0.0336879	tRNA-Glu
UUGCAAUACUUAAUUUCUUCCA	0.19	5.64	0.0336879	tRNA-Trp
CUUAACUUGACCGCUCUG	16.35	485.84	0.0336531	tRNA-Val
UAUUAAAGGUUCGUUUGU	24.8	739.54	0.0335344	l-rRNA
ACUUAACUUGACCGCUCUGA	9.58	288.02	0.0332616	tRNA-Val
ACAACAUGGCUUUCUCACCA	0.56	16.91	0.0331165	tRNA-Ser
UUGUAGUCCGUGCGAGAAUACCA	9.02	273.07	0.0330318	tRNA-Glu
AAAAUGUUUAGACGGGC	0.38	11.52	0.0329861	tRNA-Phe
AGGCCGGAGCAGGAACAGGUUG	0.75	22.8	0.0328947	COX1
CUUAACUUGACCGUUCUGA	0.75	23.04	0.0325521	tRNA-Val
AGCUCCGAGGUGAUUUUCAUAUUGA	0.94	28.92	0.0325035	tRNA-Cys
AUACUUAAUUUCUGCCA	1.13	34.81	0.0324619	tRNA-Trp
UAGUCCGUGCGAGAAUACCA	2.07	64.22	0.0322329	tRNA-Glu
CUUAACUUGACCGCUC	3.95	122.56	0.0322291	tRNA-Val
CAACUUAACUUGACCGCUCUGACCA	1.5	47.31	0.0317058	tRNA-Val
ACUAAGUGUUUGUGGGUUA	0.38	12.01	0.0316403	tRNA-Asn
CUGAUGUUCGCCGACCGUU	0.38	12.01	0.0316403	intergenic
UUAAAAAUUUCGGUUGGG	2.07	65.69	0.0315116	l-rRNA
CAUUAAAAAUUUCGGUUGGG	23.11	737.34	0.0313424	l-rRNA
UCCGUGCGAGAAUACCA	0.56	17.89	0.0313024	tRNA-Glu
AAUACUUAAUUUCUGCCA	12.78	408.87	0.0312569	tRNA-Trp
AUUUCGACUCAUUAAAUUAUG	1.13	36.28	0.0311466	tRNA-Arg
AGAACCAGCACCUCUUUACAGUGACCA	0.38	12.26	0.0309951	tRNA-Lys
AAGGACCUGGCGGUGCU	0.19	6.13	0.0309951	s-rRNA
UUGUAAAAAACUCCAGUUGACA	0.19	6.13	0.0309951	s-rRNA
AUUAAAGGUUCGUUUGU	0.75	24.27	0.0309023	l-rRNA
UAGGAUGGUGUGUGAUAGGUGGCACGGAG	0.75	24.27	0.0309023	tRNA-Gln
GAGAAAGCUCACAAGAACUGCU	5.26	172.08	0.0305672	tRNA-Ser
CAGAACCCAACCUCCGAGCAG	0.56	18.38	0.0304679	l-rRNA
ACUUAACUUGACCGCUCUGACCA	192.04	6419.83	0.0299136	tRNA-Val
AAUACUUAAUUUCUGCC	0.19	6.37	0.0298273	tRNA-Trp
CUUGACCGCUCUGACCA	1.5	50.5	0.029703	tRNA-Val
CAGAGAAUGGUUUAAAUUAGAAUCUUAG	0.75	25.25	0.029703	tRNA-Pro
GAGAAAGCUCACAAGAACUGCUAACUC	3.19	107.86	0.0295754	tRNA-Ser
AAGGGUCGAAGGUGGAU	0.56	19.12	0.0292887	s-rRNA
AUUUAACUUGACCGCUCUGACCA	1.32	45.1	0.0292683	tRNA-Val
AAAGGACCUGGCGGUGCU	0.38	12.99	0.0292533	s-rRNA
UUUUUCCAAGGACACCA	0.38	12.99	0.0292533	tRNA-Thr
UGCAAUACUUAAUUUCUGCCA	1.69	58.34	0.0289681	tRNA-Trp
GAGGCCGGAGCAGGAACAGGUU	0.56	19.36	0.0289256	COX1
UAAAGACGUUAGGUCAAGGUGUA	0.38	13.24	0.0287009	s-rRNA
AACUUACACUUAGGAGAUUUC	0.19	6.62	0.0287009	tRNA-Val
AGUAAGGUCAGCUAAAUAAGCUAUCGGU	0.19	6.62	0.0287009	tRNA-Met
CAUAAUCGGAGGCUUUGGCAA	0.19	6.62	0.0287009	COX1
UAACAACAUGGCUUUCUCACCA	0.19	6.62	0.0287009	tRNA-Ser
UCAUGGGGAAGCAGAUUUG	0.19	6.62	0.0287009	intergenic
UGGUAUAUAGUUUAAACAAA	0.19	6.62	0.0287009	tRNA-Arg
UGGUUGUAGUCCGUGCGAGAAUACC	0.19	6.62	0.0287009	tRNA-Glu
GUUUAGACGGGCUCAC	2.07	72.31	0.0286267	tRNA-Phe
ACUUAACUUGACCGUUCUGACCA	18.6	662.08	0.0280933	tRNA-Val
ACUUAACUUGACCGCUCUGACUA	2.44	87.75	0.0278063	tRNA-Val
AAAUUUUGGUGCAACUCCAAAUA	0.19	6.86	0.0276968	tRNA-Leu
AGAACCCAACCUCCGAGCAGUA	0.19	6.86	0.0276968	l-rRNA
UAGGAUGGAGUGUGAUAGGUGGCACGGAG	0.19	6.86	0.0276968	tRNA-Gln
GAGAUUUCAACUUAACUUGACCGCUCUG	1.13	41.43	0.0272749	tRNA-Val
CUAUUAAAGGUUCGUUUGU	0.38	13.97	0.0272011	l-rRNA
CUUCAAACCUGCCGGGGCUUCCA	1.13	41.92	0.0269561	tRNA-Cys
AUUAACUUGACCGCUCUGACCA	0.38	14.22	0.0267229	tRNA-Val
CUUAACCUGACCGCUCUGACCA	0.19	7.11	0.0267229	tRNA-Val
GAGAAGACCCUAUGGAGCU	0.19	7.11	0.0267229	l-rRNA
UGAUAAUCAUAUUUACCAACCA	0.19	7.11	0.0267229	tRNA-Arg
CAGAGUGUCGCUUAACACAAAGCACCCA	0.75	28.43	0.0263806	tRNA-Val
AUAAUCAUAUUUACCAACCA	7.52	286.06	0.0262882	tRNA-Arg
ACUCUUUUUGUAUAAAUAGUACCGUU	0.56	21.33	0.0262541	tRNA-Gly
AAGGUAUUGGAAAAACCAUUUC	0.19	7.35	0.0258503	tRNA-Asp
GUCCGUGCGAGAAUACCA	0.19	7.35	0.0258503	tRNA-Glu
GUGUACUGGAAAGUGCACUUGGACGAAC	0.19	7.35	0.0258503	s-rRNA
UAACUUGACCGCUCUGACCA	4.32	168.65	0.0256152	tRNA-Val
AAAGGACCUGGCGGUGCUU	0.38	14.95	0.0254181	s-rRNA
ACUUAACUUGAUCGCUCUGACCA	2.07	81.63	0.0253583	tRNA-Val
AACCAACACCUCUUUACAGU	0.19	7.6	0.025	tRNA-Lys
CUUAACUUGAUCGCUCUGA	0.19	7.6	0.025	tRNA-Val
GAUAAUCAUAUUUACCAACCA	0.19	7.6	0.025	tRNA-Arg
GAGGCCGGAGCAGGAACAGGUUG	0.75	30.15	0.0248756	COX1
AAAGGACCUGGCGGUGCUUCA	1.13	45.59	0.0247861	s-rRNA
GCAUUAAAAAUUUCGGUUGGG	1.32	53.44	0.0247006	l-rRNA
ACUUAAUUUGACCGCUCUGACCA	1.88	76.23	0.0246622	tRNA-Val
AUUAAAAAUUUCGGUUGGG	0.75	30.89	0.0242797	l-rRNA
UGGUAUAUGGUUUAAACAAAACGAA	0.19	7.84	0.0242347	tRNA-Arg
CUCGCCAGAACACUACGAGCCA	0.19	8.09	0.0234858	s-rRNA
CAAUACUUAAUUUCUGCUA	0.56	24.02	0.0233139	tRNA-Trp
CAGAGAAUGGUUUAAAUUAGAAUCUUA	3.38	145.11	0.0232927	tRNA-Pro
AAGACGAGAAGACCCUAUGGAGCUUU	0.38	16.42	0.0231425	l-rRNA
CUUAACUUGACCGCUCUGAA	12.59	544.67	0.0231149	tRNA-Val
GUUUUUCAUAUCAUUGGUCG	0.19	8.33	0.0228091	tRNA-Glu
GUUGCAAUACUUAAUUUCUGCCA	0.94	41.67	0.0225582	tRNA-Trp
CAGAGUGUAGCUUAACACAAAGCACCC	0.38	16.91	0.0224719	tRNA-Val
AAAAAAAGUAAAAGGAACUCGG	0.19	8.58	0.0221445	l-rRNA
ACUUAACUUGACCGCUCUAA	0.19	8.58	0.0221445	tRNA-Val
CAACUUAACUUGACCGCU	0.19	8.58	0.0221445	tRNA-Val
CAUCGGCUGAGAGGGCGUA	0.19	8.58	0.0221445	ND5
UGACAAAGUUAUGAAAUGGU	0.19	8.58	0.0221445	intergenic
CACUGUAAUGCUAACUUAGCAUUAACCU	0.56	25.74	0.021756	tRNA-Lys
CACUGUAAAGCUAACUUAGCAU	0.94	43.88	0.0214221	tRNA-Lys
AACUUGACCGUUCUGACCA	2.44	114.47	0.0213156	tRNA-Val
CACAUCACCCCAUAAACACCA	0.94	44.37	0.0211855	tRNA-Phe
UAACUUGACCGUUCUGACCA	0.56	26.47	0.021156	tRNA-Val
UAACUUGACCGCUCUGAA	0.19	9.07	0.0209482	tRNA-Val
UGACAAAGUUAUGAAAUGGUU	0.19	9.07	0.0209482	intergenic
CUUAACUUGACCGCUCUGA	17.66	858.43	0.0205724	tRNA-Val
CUUAACUUGACCGCUCUGACC	4.7	229.93	0.020441	tRNA-Val
UAGGAUGGCGUGUGAUAGGUGGCACGGAG	0.19	9.31	0.0204082	tRNA-Gln
CUGAUGUUCGCCGACCGUUG	1.69	82.85	0.0203983	intergenic
UAAAGACUUUUUCUCUGA	0.19	9.56	0.0198745	tRNA-Pro
ACUUGACCGUUCUGACCA	0.75	37.75	0.0198675	tRNA-Val
CACUGUAAGGCUAACUUAGCAUUAACCUU	0.56	28.19	0.0198652	tRNA-Lys
GAGUGAAGCAUUGGACUGUA	0.19	9.81	0.019368	tRNA-Tyr
UGUUUAGACGGGCUCACAUCACCCCAUA	0.19	9.81	0.019368	tRNA-Phe
UGGUUGUAGUCCGUGCGAGAAUACCA	9.96	524.57	0.018987	tRNA-Glu
CUUAACUUGACAGCUCUGACCA	0.19	10.05	0.0189055	tRNA-Val
CUUAACUUGACCGCUCUGACAA	0.19	10.05	0.0189055	tRNA-Val
CAGAGAAUUGUUUAAAUUAGAAUCUUA	1.88	99.52	0.0188907	tRNA-Pro
CAGAGUGUUGCUUAACACAAAGCACCC	1.13	60.79	0.0185886	tRNA-Val
CUUAACUUGACCGCUUUGACCA	2.82	152.47	0.0184954	tRNA-Val
ACUUAACUUGACCGAUCUGACCA	0.19	10.3	0.0184466	tRNA-Val
AGUCCGUGCGAGAAUACCA	0.19	10.3	0.0184466	tRNA-Glu
CACUGUAAAGCUAACUUAGCAUUAACCUU	0.19	10.3	0.0184466	tRNA-Lys
GUAAAGACGUUAGGUCAAGGUGUAGC	0.19	10.3	0.0184466	s-rRNA
CUUAACUUGACCGCUCU	6.58	363.03	0.0181252	tRNA-Val
CACUGUAAGGCUAACUUAGCA	0.38	21.08	0.0180266	tRNA-Lys
ACUGAACUUGACCGCUCUGACCA	0.19	10.54	0.0180266	tRNA-Val
GCAAUACUUAAUUUCUGCUA	0.19	10.54	0.0180266	tRNA-Trp
AAGGUAUUGGAAAAACCAUUU	1.88	105.16	0.0178775	tRNA-Asp
AACCAACACCUCUUUACAGUGACCA	3.76	210.81	0.017836	tRNA-Lys
GCAAUACUUAAUUUCUUCCA	0.38	21.33	0.0178153	tRNA-Trp
CUUAACUUGACCGCUCUUACCA	1.69	95.11	0.0177689	tRNA-Val
CUUAACUUGACCGAUCUGACCA	0.38	22.31	0.0170327	tRNA-Val
AAGGUAUUAGAAAAACCA	0.19	11.28	0.016844	tRNA-Asp
AAAGGACCUGGCGGUGCUUC	0.56	33.83	0.0165534	s-rRNA
AACCAUCACCUCUUUACAGUGACCA	0.38	23.04	0.0164931	tRNA-Lys
ACUUAACUUGACCGCUUUGACCA	0.38	23.04	0.0164931	tRNA-Val
ACUCUUUUAGUAUAAAUAGUACCGUUA	0.19	11.52	0.0164931	tRNA-Gly
AUGAUAGGGGAAGUAGCGUC	0.19	11.52	0.0164931	intergenic
GUUAAGAUGGCAGAGCCCGGUAAUU	0.19	11.52	0.0164931	tRNA-Leu
UAACUUGACCGCUCUGA	0.19	11.52	0.0164931	tRNA-Val
UCUAACAACAUGGCUUUCUCACC	0.19	11.52	0.0164931	tRNA-Ser
AGAACCAACACCUCUUUACAGUGACCA	0.56	34.56	0.0162037	tRNA-Lys
GAGAAAGCUCACAAGAACUGCUAACUCA	0.56	34.56	0.0162037	tRNA-Ser
ACAACAUUCAAAAAAGAGUACUA	0.19	11.77	0.0161427	tRNA-Gly
CGUAACUUGACCGCUCUGACCA	0.19	11.77	0.0161427	tRNA-Val
GAGAUUUCAACUUAACUUGACCGCUCU	0.19	11.77	0.0161427	tRNA-Val
CACUGUAAUGCUAACUUAGCAU	0.56	34.81	0.0160873	tRNA-Lys
CAGAGUGUUGCUUAACACAAAGCACCCA	9.77	609.87	0.0160198	tRNA-Val
UCUAACAACAUGGCUUUCUCACCA	2.07	132.37	0.015638	tRNA-Ser
UAGGAUGGGGUGUGAUAGGA	0.19	12.26	0.0154976	tRNA-Gln
CCAGCACCUCUUUACAGUGACCA	1.13	73.05	0.0154689	tRNA-Lys
AAGGGUCGAAGGUGGAUUU	0.38	25	0.0152	s-rRNA
CUUAACUUGACUGCUCUGACCA	0.38	25.49	0.0149078	tRNA-Val
UAAGUUGCAAUACUUAAUUUCUGCCA	0.19	12.75	0.014902	tRNA-Trp
UUAACUUGACCGCUCUGA	0.19	12.75	0.014902	tRNA-Val
CAGAACCCAACCUCCGAGCAGU	0.75	50.5	0.0148515	l-rRNA
AGGGAUAACAGCUAUCCAUUG	0.38	25.74	0.014763	tRNA-Leu
ACCAACACCUCUUUACAGUGACCA	1.32	89.47	0.0147535	tRNA-Lys
AAGGUAUUGGAAAAACCA	2.63	178.45	0.014738	tRNA-Asp
AAUUAACUUGACCGCUCUGACCA	0.19	12.99	0.0146266	tRNA-Val
AUGGCACAUGCAGCGCAAGUA	0.75	52.21	0.0143651	COX2
CUUAACUUUACCGCUCUGACCA	0.19	13.48	0.014095	tRNA-Val
UGGUAUAUUGUUUAAACAAAACGAAUGA	0.19	13.48	0.014095	tRNA-Arg
CUUAACUUGAUCGCUCUGACCA	6.76	480.69	0.0140631	tRNA-Val
AUGGCACAUGCAGCGCAAGUAGGU	0.38	27.45	0.0138434	COX2
AUAAUCAUAUUUACCAAUCA	0.19	13.73	0.0138383	tRNA-Arg
CUUAACUUGACCGCUCUGAUCA	0.75	54.91	0.0136587	tRNA-Val
ACAGCUAUCCAUUGGUCUUAGCCCCCAA	0.19	13.97	0.0136006	tRNA-Leu
ACUCUUUUGGUAUAAAUAGUACCGUU	0.19	13.97	0.0136006	tRNA-Gly
CACUGUAAGGCUAACUUAGCAU	0.75	55.15	0.0135993	tRNA-Lys
ACUUAAAUUGACCGCUCUGACCA	0.19	14.22	0.0133615	tRNA-Val
AUAAUCAUAUUUACCAACUA	0.19	14.46	0.0131397	tRNA-Arg
CUUAACUUGACCGCUCUGACCA	205.57	15859.4	0.0129621	tRNA-Val
CUUAACUUGACCGUUCUGACC	0.38	29.42	0.0129164	tRNA-Val
CUUAACUCGACCGCUCUGACCA	0.19	15.2	0.0125	tRNA-Val
AGCUCCGAGGUGAUUUUCAUAUUGAA	0.56	45.84	0.0122164	tRNA-Cys
CUUAAAUUGACCGCUCUGACCA	0.19	15.69	0.0121096	tRNA-Val
CUUAACUUGACCGUUCUGACCA	28.19	2331.88	0.012089	tRNA-Val
UGGUAUAUUGUUUAAACAAA	0.38	31.62	0.0120177	tRNA-Arg
CAGAGUGUAGCUUAACACAAAGCACCCAA	0.19	15.93	0.0119272	tRNA-Val
UUGUAAAAAACUCCAGUUGACAC	0.19	15.93	0.0119272	s-rRNA
CACUGUAAAGCUAACUUAGCAUUAACCU	0.19	16.67	0.0113977	tRNA-Lys
AACCAGCACCUCUUUACAGUGACCA	1.69	152.22	0.0111024	tRNA-Lys
GUAGUCCGUGCGAGAAUACCA	0.75	67.9	0.0110457	tRNA-Glu
CAGAGUGUGGCUUAACACAAAGCACCC	0.19	17.4	0.0109195	tRNA-Val
GCAAUACUUAAUUUCUGCCA	7.89	730.23	0.0108048	tRNA-Trp
CUUAACUUGACCGCUCUGACUA	2.07	195.36	0.0105958	tRNA-Val
UGGUAUAUGGUUUAAACAAAACGAAUG	1.69	162.76	0.0103834	tRNA-Arg
AAAAAUUUCGGUUGGG	0.19	18.38	0.0103373	l-rRNA
ACAACAUUCAAAAAAGAGUAUCA	0.19	18.38	0.0103373	tRNA-Gly
AAGGUAUUGGAAAAACCAU	1.32	130.65	0.0101033	tRNA-Asp
CACUGUAAUGCUAACUUAGCAUUAAC	0.94	95.35	0.00985842	tRNA-Lys
ACUUAACUUUACCGCUCUGACCA	0.19	19.61	0.00968893	tRNA-Val
AGUUGCAAUACUUAAUUUCUGCCA	0.75	78.19	0.00959202	tRNA-Trp
UUUAACUUGACCGCUCUGACCA	0.56	59.08	0.00947867	tRNA-Val
UGGUAUAUGGUUUAAACAAA	0.19	20.1	0.00945274	tRNA-Arg
AAGGGUCGAAGGUGGAUU	0.19	20.35	0.00933661	s-rRNA
CACUGUAAUGCUAACUUAGCAUUAA	0.56	60.3	0.0092869	tRNA-Lys
CAGAGUGUGGCUUAACACAAAGCACCCA	1.32	142.17	0.00928466	tRNA-Val
CUUAAUUUGACCGCUCUGACCA	1.69	182.62	0.00925419	tRNA-Val
CAGAGAAUAGUUUAAAUUAGAAUCUUA	0.19	21.33	0.00890764	tRNA-Pro
ACCAGCACCUCUUUACAGUGACCA	0.38	43.88	0.00865998	tRNA-Lys
CUUAACUUGACCGCUCUGU	0.38	44.12	0.00861287	tRNA-Val
CCAACACCUCUUUACAGUGACCA	1.69	197.08	0.0085752	tRNA-Lys
CUAACAACAUGGCUUUCUCACCA	0.19	22.55	0.00842572	tRNA-Ser
CUUAACUUGACCGCUCUGACCC	0.38	45.35	0.00837927	tRNA-Val
UUGCAAUACUUAAUUUCUGCCA	1.32	157.62	0.00837457	tRNA-Trp
ACUUAACUUGACCGCUCUGACCC	0.19	24.02	0.00791007	tRNA-Val
CCUUUUUCCAAGGACACCA	0.19	26.23	0.00724361	tRNA-Thr
UGGUAUAUAGUUUAAACAAAACGAAUG	0.38	54.42	0.00698273	tRNA-Arg
CACUGUAACGCUAACUUAGCAUUA	0.19	27.21	0.00698273	tRNA-Lys
ACUUAACUUGACCGCUCUGU	0.19	28.92	0.00656985	tRNA-Val
CAAUACUUAAUUUCUGUCA	0.19	29.42	0.00645819	tRNA-Trp
ACUCUUUUUGUAUAAAUAGUACCGUUA	0.19	30.15	0.00630182	tRNA-Gly
AAGGUAUUGGAAAAACCAUU	0.19	32.11	0.00591716	tRNA-Asp
UGGUAUAUUGUUUAAACAAAACGAAUG	1.13	193.65	0.00583527	tRNA-Arg
CACUGUAAUGCUAACUUAGCAUU	1.32	228.7	0.00577175	tRNA-Lys
CAAUACUUAAUUUCUGCCA	20.48	3562.4	0.00574893	tRNA-Trp
CACUGUAAAGCUAACUUAGCAUUAAC	0.38	74.76	0.00508293	tRNA-Lys
CAGAGUGUAGCUUAACACAAAGCACCCA	0.56	112.02	0.00499911	tRNA-Val
UGGUAUAUUGUUUAAACAAAACG	0.19	39.71	0.00478469	tRNA-Arg
ACAACAUUCAAAAAAGAGUACCA	2.82	634.38	0.00444529	tRNA-Gly
CAAUACUUAAUUUUUGCCA	0.19	43.63	0.0043548	tRNA-Trp
CACUGUAAGGCUAACUUAGCAUU	1.5	352.49	0.00425544	tRNA-Lys
UCUAACAACAUGGCUUUCUCAUCA	0.19	44.86	0.0042354	tRNA-Ser
CACUGUAAGGCUAACUUAGCAUUAAC	0.56	146.58	0.00382044	tRNA-Lys
CAAUACUUAAUUUCUGC	0.19	52.46	0.00362181	tRNA-Trp
CACUGUAAAGCUAACUUAGCAUU	0.56	182.13	0.00307473	tRNA-Lys
CACUGUAAAGCUAACUUAGCAUUAA	0.19	62.51	0.00303951	tRNA-Lys
CACUGUAAAGCUAACUUAGCAUUA	0.75	250.27	0.00299676	tRNA-Lys
CACUGUAAGGCUAACUUAGCAUUA	1.32	584.62	0.00225788	tRNA-Lys
CACUGUAAUGCUAACUUAGCAUUA	0.75	357.39	0.00209855	tRNA-Lys
CACUGUAAGGCUAACUUAGCAUUAA	0.19	126.48	0.00150221	tRNA-Lys
CAACAUUCAAAAAAGAGUACCA	0.56	413.28	0.00135501	tRNA-Gly
CUUAACUUGACCUCUCUGACCA	0	57.36	0	tRNA-Val
ACCUUUUUCCAAGGACACCA	0	52.21	0	tRNA-Thr
UCUAACAACAUGGCUUUCUCACUA	0	45.35	0	tRNA-Ser
CACUGUAAGGCUAACUUAGCAUUAACCU	0	40.94	0	tRNA-Lys
UAAUACUUAAUUUCUGCCA	0	37.5	0	tRNA-Trp
UGGUAUAUGGUUUAAACAAAACG	0	34.07	0	tRNA-Arg
CUUAACUUGACCGCUCUGCCCA	0	27.21	0	tRNA-Val
ACUCUUUUGGUAUAAAUAGUACCGUUA	0	24.76	0	tRNA-Gly
AGGGUUGGUCAAUUUCGU	0	23.53	0	s-rRNA
ACAACAUUCAAAAAAGAGUA	0	22.55	0	tRNA-Gly
AACAUUCAAAAAAGAGUACCA	0	20.1	0	tRNA-Gly
AAGGAUAACAGCUAUCCAUUG	0	19.36	0	tRNA-Leu
GCAAUACUUAAUUUCUGC	0	17.16	0	tRNA-Trp
UUCAUGGGGAAGCAGAUUUG	0	16.18	0	intergenic
AUGAUAGGGGAAGUAGCGUCUUG	0	15.93	0	intergenic
UGGUAUAUCGUUUAAACAAAACGAAUG	0	15.69	0	tRNA-Arg
CACUGUAACGCUAACUUAGCAUU	0	14.95	0	tRNA-Lys
CUUAACUUGACCGCUCUAA	0	13.48	0	tRNA-Val
AACACCUCUUUACAGUGACCA	0	13.24	0	tRNA-Lys
GUUCUUGUUGUUGAAAUACAACGAUG	0	12.75	0	tRNA-Glu
CAACAUUCAAAAAAGAGUAUCA	0	12.5	0	tRNA-Gly
CACUGUAAUGCUAACUUAGCA	0	12.5	0	tRNA-Lys
UGGUAUAUUGUUUAAACAAAACGAA	0	12.5	0	tRNA-Arg
AUGGAUAACAGCUAUCCAUUG	0	12.01	0	tRNA-Leu
CACUGUAAGGCUAACUUAGCAUUAACC	0	12.01	0	tRNA-Lys
CUUUGGUUGCUAAUGGUGGAGUUAA	0	11.77	0	tRNA-Pro
CACUGUAAAGCUAACUUAGCA	0	11.52	0	tRNA-Lys
CUUAACUUGACCGCUCCGACCA	0	11.52	0	tRNA-Val
CACAAGAACUGCUAACUCA	0	11.28	0	tRNA-Ser
CUUAACUUGACCACUCUGACCA	0	11.28	0	tRNA-Val
CAAUACUUAAUUUCUGCC	0	11.03	0	tRNA-Trp
CUUAACUUGACCGCUUUGA	0	11.03	0	tRNA-Val
UGGUAUAUGGUUUAAACAAAACGAAUGA	0	10.79	0	tRNA-Arg
CAUUCAAAAAAGAGUACCA	0	10.3	0	tRNA-Gly
CAAUACUUAAAUUCUGCCA	0	10.05	0	tRNA-Trp
CAACAUUCAAAAAAGAGUA	0	9.81	0	tRNA-Gly
CACUGUAAUGCUAACUUAGCAUUAACC	0	9.81	0	tRNA-Lys
UGUGAAUCUGACAACAGAGGCUUA	0	9.81	0	tRNA-His
CAGAACACUACGAGCCACA	0	9.56	0	s-rRNA
CCAUCACCUCUUUACAGUGACCA	0	9.56	0	tRNA-Lys
AGAGAUGUGUUUAAGUGCUGUG	0	9.31	0	intergenic
CUUGACCGUUCUGACCA	0	9.31	0	tRNA-Val
UUUUCCAAGGACACCA	0	9.31	0	tRNA-Thr
CAAUACUUAAUUUCUGCCC	0	9.07	0	tRNA-Trp
GUCCUUGUUGUAUAAACUAAUACACCAG	0	9.07	0	tRNA-Thr
CACCUCUUUACAGUGACCA	0	8.82	0	tRNA-Lys
CUUAACUGGACCGCUCUGACCA	0	8.82	0	tRNA-Val
UGGUAUAUAGUUUAAACAAAACG	0	8.58	0	tRNA-Arg
AAGGUAUUAAAAAAACCAUUU	0	8.33	0	tRNA-Asp
CAUACUUAAUUUCUGCCA	0	8.33	0	tRNA-Trp
UUUGGGUGCUAAUGGUGGAGUUAA	0	8.33	0	tRNA-Pro
CUUAACUUGACCCCUCUGACCA	0	8.09	0	tRNA-Val
GUUAAGAUGGCAGAGCCCGGUAAUCGU	0	8.09	0	tRNA-Leu
CCUCGAUGUUGGAUCAGGAC	0	7.84	0	l-rRNA
ACUUUUAAGGGAUAACAGCUAUCCAUUG	0	7.6	0	tRNA-Leu
ACUUUUAAUGGAUAACAGCUAUCCAUUG	0	7.6	0	tRNA-Leu
AUGGCACAUGCAGCGCAAGU	0	7.6	0	COX2
CAACACCUCUUUACAGUGACCA	0	7.6	0	tRNA-Lys
CUUAACUUAACCGCUCUGACCA	0	7.6	0	tRNA-Val
UAAGGGUCGAAGGUGGA	0	7.6	0	s-rRNA
AAGGUAUUUGAAAAACCAUUU	0	7.35	0	tRNA-Asp
GAGAAAGCUCACAAGAACUGCUAU	0	7.35	0	tRNA-Ser
AAAUUAUGAUAAUCAUAUUUACCAACCA	0	7.11	0	tRNA-Arg
CCAACACCUCUUUACAGUGAUCA	0	7.11	0	tRNA-Lys
CCUAACUUGACCGCUCUGACCA	0	7.11	0	tRNA-Val
GAAGAGGCGGGCAUGACACAGC	0	7.11	0	l-rRNA
AAACUUAACUUGACCGCUCUGACCA	0	6.86	0	tRNA-Val
ACUCUUUUAGUAUAAAUAGUACCGUU	0	6.86	0	tRNA-Gly
UAUUAGUUUAUACUACAAGGACA	0	6.86	0	intergenic
AAACAAAACGAAUGAUUUCGACUCA	0	6.62	0	tRNA-Arg
ACUUAACUUGACCGCUCUGCCCA	0	6.62	0	tRNA-Val
GUCCUUGUAGUAUAAACUAAUACACCAG	0	6.62	0	tRNA-Thr
AGGUCAGCUAAAUAAGCUAUCGGG	0	6.37	0	tRNA-Met
CUGAACUUGACCGCUCUGACCA	0	6.37	0	tRNA-Val
UAUUAAAGGUUCGUUUGUU	0	6.37	0	l-rRNA
AAGGGCUUUGCUUAAUUAAAGUGGCU	0	6.13	0	tRNA-Ala
ACUUAACUUGACCGCUCCGACCA	0	6.13	0	tRNA-Val
AUGGCACAUGCAGCGCAAGUAGGUC	0	6.13	0	COX2
CAAUAUUUAAUUUCUGCCA	0	6.13	0	tRNA-Trp
CAGAGAAUCGUUUAAAUUAGAAUCUUA	0	6.13	0	tRNA-Pro
CUUAACUUGACCGCUCUAACCA	0	6.13	0	tRNA-Val
GAGUGAAGCAUUGGAC	0	6.13	0	tRNA-Tyr
GCUCCGAGGUGAUUUUCAUAUUGAA	0	6.13	0	tRNA-Cys
GUUUAUGUAGCUUACCUCC	0	6.13	0	tRNA-Phe
UGGUAUAUAUUUUAAACAAAACG	0	6.13	0	tRNA-Arg
AACCAACACCUCUUUACAGUGAUCA	0	5.88	0	tRNA-Lys
AAUGGAUAACAGCUAUCCAUUG	0	5.88	0	tRNA-Leu
ACUUAACUUGACCGCUAUGACCA	0	5.88	0	tRNA-Val
GACUAUGAGAAUCGAACCCAUCC	0	5.88	0	intergenic
UGGUUGUAGUCCGUUCGAGAAUACCA	0	5.88	0	tRNA-Glu
ACACAUGUUUAACGGCCGCGGUACC	0	5.64	0	l-rRNA
AUUCAAAAAAGAGUACCA	0	5.64	0	tRNA-Gly
CUUAACUUGACCGGUCUGACCA	0	5.64	0	tRNA-Val
AGAACCCAACCUCCGAGCAGU	0	5.39	0	l-rRNA
AGCACCUCUUUACAGUGACCA	0	5.39	0	tRNA-Lys
CACUGUAACGCUAACUUAGCAUUAAC	0	5.39	0	tRNA-Lys
UGAGUGAAGCAUUGGAC	0	5.39	0	tRNA-Tyr
ACUUAACUCGACCGCUCUGACCA	0	5.15	0	tRNA-Val
CACUGUAAGGCUAACUUAGC	0	5.15	0	tRNA-Lys
CAGCACCUCUUUACAGUGACCA	0	5.15	0	tRNA-Lys
CUAACUUGACCGCUCUGACCA	0	5.15	0	tRNA-Val
CUUAACUUCACCGCUCUGACCA	0	5.15	0	tRNA-Val
CUUAACUUGACCGCUCGGACCA	0	5.15	0	tRNA-Val
UAGGAUGGGGUGUGAUU	0	5.15	0	tRNA-Gln
UGGUAUAUUGUUUAAACAAAACGA	0	5.15	0	tRNA-Arg
AACUUAACUUGAUCGCUCUGACCA	0	4.9	0	tRNA-Val
AAGGGCUUAGCUUAAUUAAAGUGGCUGG	0	4.9	0	tRNA-Ala
ACUUAACUUGACCGCUCUCACCA	0	4.9	0	tRNA-Val
ACUUAACUUGACCGCUCUGACAA	0	4.9	0	tRNA-Val
ACUUUUAAGGGAUAACAGCUAUCCAUUGG	0	4.9	0	tRNA-Leu
AUAAUCAUAUUUAUCAACCA	0	4.9	0	tRNA-Arg
CAACUUAACUUGACCGCUCUG	0	4.9	0	tRNA-Val
CUUAACUUGACCGCUG	0	4.9	0	tRNA-Val
GUUUAUGUUGCUUACCUCC	0	4.9	0	tRNA-Phe
UACAAGACUGGUGUAUUA	0	4.9	0	intergenic
AACCACCACCUCUUUACAGUGACCA	0	4.66	0	tRNA-Lys
AAGGGCUUGGCUUAAUUAAAGUGGCUGAA	0	4.66	0	tRNA-Ala
AGCUCCGAGGUGAUUUUCAUAUUUAA	0	4.66	0	tRNA-Cys
AUUUAACUUGACCGCUCUG	0	4.66	0	tRNA-Val
CAAAGUAAGCGCAAGUACCCACG	0	4.66	0	s-rRNA
CAGAGUGUAGCUUAACACAAAGCACCU	0	4.66	0	tRNA-Val
CUUAACUUGACCGCUUUG	0	4.66	0	tRNA-Val
CUUAACUUGGCCGCUCUGACCA	0	4.66	0	tRNA-Val
GAGAAAGCUCACAAGAACU	0	4.66	0	tRNA-Ser
UAACAUUCAAAAAAGAGUACCA	0	4.66	0	tRNA-Gly
UGGGUGCUAAUGGUGGAGUUAA	0	4.66	0	tRNA-Pro
UGGUAUAUAGUUUAAACAAAACAAAUG	0	4.66	0	tRNA-Arg
UUAACUUGACCGCUCUGAC	0	4.66	0	tRNA-Val
UUCAUGGGGAAGCAGAUUUGGG	0	4.66	0	intergenic
UUUCAUGGGGAAGCAGAUUUG	0	4.66	0	intergenic
AAGGGCUUAGCUUAAUUAAAGUGGCUGAA	0	4.41	0	intergenic,tRNA-Ala
AAGGUAUUAGAAAAACCAU	0	4.41	0	tRNA-Asp
AUGGCACAUGCAGCGCAA	0	4.41	0	COX2
AUGGCACAUGCAGCGCAAG	0	4.41	0	COX2
CACUGUAAAGCUAACUUAGCAUUAACC	0	4.41	0	tRNA-Lys
CUCACAAGAACUGCUAACUCAUGC	0	4.41	0	tRNA-Ser
CUUAACUUGACCGCUCUGGCCA	0	4.41	0	tRNA-Val
CUUAAUUUGACCGCUCU	0	4.41	0	tRNA-Val
CUUAGCUUGACCGCUCUGACCA	0	4.41	0	tRNA-Val
GAGAAAGCUCACAAGAACUGCUAACUCAA	0	4.41	0	intergenic,tRNA-Ser
GUUGCAAUACUUAAUUUCUUCCA	0	4.41	0	tRNA-Trp
UAGGAUGGCGUGUGAUAGGUGGCACGGAGA	0	4.41	0	tRNA-Gln
ACAACAUUCAAAAAAGAGGACCA	0	4.17	0	tRNA-Gly
ACUUUUAAAGGAUAACAGCUAUCCAUUGG	0	4.17	0	tRNA-Leu
AGAAAUUUAGGUUAAAUACAGACCAAG	0	4.17	0	tRNA-Trp
AUGGCACAUGCAGCGCAAGUAG	0	4.17	0	COX2
CACUGUAACGCUAACUUAGCAUUAA	0	4.17	0	tRNA-Lys
CUUAACUUGACCGCUCUA	0	4.17	0	tRNA-Val
CUUGACCAACGGAACAAGUUA	0	4.17	0	l-rRNA
GUAAAUAUGGUUUAACCAAAACAUCAG	0	4.17	0	tRNA-His
UACUGUAAAGCUAACUUAGCAUUA	0	4.17	0	tRNA-Lys
UCUAACAACAUGGCUUUCUCACA	0	4.17	0	tRNA-Ser
UGGUAUAUCGUUUAAACAAAACG	0	4.17	0	tRNA-Arg
ACAUUCAAAAAAGAGUACCA	0	3.92	0	tRNA-Gly
ACUUAACUUGACAGCUCUGACCA	0	3.92	0	tRNA-Val
ACUUAACUUGACCGCUCUA	0	3.92	0	tRNA-Val
AUGGCACAUGCAGCGCAAGUAGG	0	3.92	0	COX2
AUGGCACAUGCAGCGCAAGUAGGUCUAC	0	3.92	0	COX2
CAAGACUUAAUUUCUGCCA	0	3.92	0	tRNA-Trp
CAGUUGAUUAGGGUGCUUAG	0	3.92	0	tRNA-Asn
CUUAACUUGAACGCUCUGACCA	0	3.92	0	tRNA-Val
CUUAACUUGACCGCUCUGACCU	0	3.92	0	tRNA-Val
CUUAACUUGACCGCUCUGUCCA	0	3.92	0	tRNA-Val
CUUCAAACCUGCCGGGGCUUCC	0	3.92	0	tRNA-Cys
GCUAAACCUAGCCCCAAACCCA	0	3.92	0	l-rRNA
UGCCCCCAUGUCUAACAACAUGGCU	0	3.92	0	tRNA-Ser
UGGUAUAUGGUUUAAACAAAACGA	0	3.92	0	tRNA-Arg
UUUAACUUGACCGCUCUGA	0	3.92	0	tRNA-Val
UUUAUACUACAAGGACAG	0	3.92	0	intergenic
AACUUAACUUGACCGCUCUGU	0	3.68	0	tRNA-Val
AACUUAACUUGACCGCUCUUACCA	0	3.68	0	tRNA-Val
AAGGGAUAACAGCUAUCCAUUG	0	3.68	0	tRNA-Leu
AAGGUAUUGGAAAAACCAUUUCA	0	3.68	0	tRNA-Asp
ACCAUCACCUCUUUACAGUGACCA	0	3.68	0	tRNA-Lys
ACGAAUGAUUUCGACUCAUUA	0	3.68	0	tRNA-Arg
ACUUUUAAAGGAUAACAGCUAUCCAUUG	0	3.68	0	tRNA-Leu
ACUUUUUUCCAAGGACACCA	0	3.68	0	tRNA-Thr
AGACUUUUUCUCUGAUCA	0	3.68	0	tRNA-Pro
AGGCGAUAGAAAUUGAAACCUGGC	0	3.68	0	l-rRNA
AUGAUAGGGGAAGUAGCG	0	3.68	0	intergenic
AUGAUAGGGGAAGUAGCGU	0	3.68	0	intergenic
CCAACAUCUCUUUACAGUGACCA	0	3.68	0	tRNA-Lys
CUUAACUUGACCGCUCAGACCA	0	3.68	0	tRNA-Val
CUUAACUUGACCGCUCUGAACA	0	3.68	0	tRNA-Val
CUUAACUUGACUGCUCUGA	0	3.68	0	tRNA-Val
CUUAAUUUGACCGCUCUGACC	0	3.68	0	tRNA-Val
GAGGCCGGAGCAGGAACAGG	0	3.68	0	COX1
GCAAUACUUAAUUUCUGCC	0	3.68	0	tRNA-Trp
GUUAAGAUGGCAGAGCCCGGG	0	3.68	0	tRNA-Leu
GUUCAUCGGCUGAGAGGGC	0	3.68	0	ND5
UAACGGCCGCGGUACCCUA	0	3.68	0	l-rRNA
UAACUUGACCGCUUUGACCA	0	3.68	0	tRNA-Val
UAACUUGAUCGCUCUGACCA	0	3.68	0	tRNA-Val
UAGGAUGGGGUGUGAUAA	0	3.68	0	tRNA-Gln
UGGUAUAUAGUUUAAACAAAACGAAUGA	0	3.68	0	tRNA-Arg
UGUUUAGACGGGCUCACU	0	3.68	0	tRNA-Phe
UUGGGUGCUAAUGGUGGAGUUAAA	0	3.68	0	tRNA-Pro
[truncated: 151 more rows]

## Sheet: box CD snoRNA
Sequence	Nuclear	Cytoplsamic	N/C	Gene
[truncated: 498 more rows]

[truncated: 15 more sheets: tRNA 3' trailer, unknown, scaRNA, box HACA snoRNA, snRNA, ETS, ITS, genomic repeats, Y RNA, SRP RNA, Xist, ACA45, 7SK RNA, vRNA, RNaseMRP RNA]
