# Supplementary material for: Deep Sequencing of Human Nuclear and Cytoplasmic Small RNAs Reveals an Unexpectedly Complex Subcellular Distribution of miRNAs and tRNA 3′ Trailers
Source: PLoS One. 2010 May 14;5(5):e10563. doi: 10.1371/journal.pone.0010563 (PMC2871053; doi:10.1371/journal.pone.0010563)
Supplement: Table S5 — The N/C values of all isomiRs. The isomiRs are shown only if it displayed a raw read count (non-normalized) more than 10 in at least one library. (0.26 MB XLS) [file pone.0010563.s007.xls]

## Sheet: Supplemental table 5
Table S5. The N/C values of all isomiRs. The isomiRs are shown only if it displayed a raw read count (non-normalized) more than 10 in at least one library.
miRNA	Sequence of isomiR	3’ end hexanucleotide	Nuclear library	Cytoplasmic library	N/C
hsa-let-7a-1
	AUGAGGUAGUAGGUUGU	GGUUGU	6.8	5.1	1.33333
	AUGAGGUAGUAGGUUGUAUAGUU	AUAGUU	2.6	2.5	1.04
	UGAGGUAGUAGGUUGU	GGUUGU	176.1	105.6	1.66761
	UGAGGUAGUAGGUUGUA	GUUGUA	316.1	215	1.47023
	UGAGGUAGUAGGUUGUAU	UUGUAU	932	614	1.51792
	UGAGGUAGUAGGUUGUAUA	UGUAUA	1162	697.4	1.66619
	UGAGGUAGUAGGUUGUAUAG	GUAUAG	1891.1	1525.4	1.23974
	UGAGGUAGUAGGUUGUAUAGU	UAUAGU	12770.1	9093.9	1.40425
	UGAGGUAGUAGGUUGUAUAGUU	AUAGUU	214530	103456	2.07364
	UGAGGUAGUAGGUUGUAUAGUUU	UAGUUU	15061.6	6899.8	2.1829
	UGAGGUAGUAGGUUGUAUAGUUUU	AGUUUU	321.9	126.5	2.54466
	UGAGGUAGUAGGUUGUAUAGUUUUA	GUUUUA	4.7	1.2	3.91667
	GAGGUAGUAGGUUGUAUA	UGUAUA	2.8	1	2.8
	GAGGUAGUAGGUUGUAUAG	GUAUAG	6.8	3.4	2
	GAGGUAGUAGGUUGUAUAGU	UAUAGU	25.7	17.6	1.46023
	GAGGUAGUAGGUUGUAUAGUU	AUAGUU	471.1	201.2	2.34145
	GAGGUAGUAGGUUGUAUAGUUU	UAGUUU	47	17.9	2.6257
	GAGGUAGUAGGUUGUAUAGUUUU	AGUUUU	2.1	1	2.1
	AGGUAGUAGGUUGUAUAGUU	AUAGUU	21.4	15.2	1.40789
	AGGUAGUAGGUUGUAUAGUUU	UAGUUU	3	1.2	2.5
	GGUAGUAGGUUGUAUAGUU	AUAGUU	18.8	5.4	3.48148
	GUAGUAGGUUGUAUAGUU	AUAGUU	3.8	1.2	3.16667
hsa-let-7a-2
	GGUUGAGGUAGUAGGUUGU	GGUUGU	3	0.5	6
	UUGAGGUAGUAGGUUGU	GGUUGU	8.3	6.1	1.36066
	UUGAGGUAGUAGGUUGUAUAG	GUAUAG	2.6	2.2	1.18182
	UUGAGGUAGUAGGUUGUAUAGU	UAUAGU	18.2	9.8	1.85714
	UUGAGGUAGUAGGUUGUAUAGUU	AUAGUU	4.5	2.2	2.04545
	UGAGGUAGUAGGUUGU	GGUUGU	176.1	105.6	1.66761
	UGAGGUAGUAGGUUGUA	GUUGUA	316.1	215	1.47023
	UGAGGUAGUAGGUUGUAU	UUGUAU	932	614	1.51792
	UGAGGUAGUAGGUUGUAUA	UGUAUA	1162	697.4	1.66619
	UGAGGUAGUAGGUUGUAUAG	GUAUAG	1891.1	1525.4	1.23974
	UGAGGUAGUAGGUUGUAUAGU	UAUAGU	12770.1	9093.9	1.40425
	UGAGGUAGUAGGUUGUAUAGUU	AUAGUU	214530	103456	2.07364
	UGAGGUAGUAGGUUGUAUAGUUU	UAGUUU	15061.6	6899.8	2.1829
	UGAGGUAGUAGGUUGUAUAGUUUA	AGUUUA	138.5	82.1	1.68697
	UGAGGUAGUAGGUUGUAUAGUUUAG	GUUUAG	3	0.7	4.28571
	GAGGUAGUAGGUUGUAUA	UGUAUA	2.8	1	2.8
	GAGGUAGUAGGUUGUAUAG	GUAUAG	6.8	3.4	2
	GAGGUAGUAGGUUGUAUAGU	UAUAGU	25.7	17.6	1.46023
	GAGGUAGUAGGUUGUAUAGUU	AUAGUU	471.1	201.2	2.34145
	GAGGUAGUAGGUUGUAUAGUUU	UAGUUU	47	17.9	2.6257
	AGGUAGUAGGUUGUAUAGUU	AUAGUU	21.4	15.2	1.40789
	AGGUAGUAGGUUGUAUAGUUU	UAGUUU	3	1.2	2.5
	GGUAGUAGGUUGUAUAGUU	AUAGUU	18.8	5.4	3.48148
	GUAGUAGGUUGUAUAGUU	AUAGUU	3.8	1.2	3.16667
hsa-let-7a-3
	GUGAGGUAGUAGGUUGUAUAG	GUAUAG	8.1	5.9	1.37288
	GUGAGGUAGUAGGUUGUAUAGU	UAUAGU	46.8	27.5	1.70182
	GUGAGGUAGUAGGUUGUAUAGUU	AUAGUU	72.3	36.5	1.98082
	GUGAGGUAGUAGGUUGUAUAGUUU	UAGUUU	6	2.9	2.06897
	UGAGGUAGUAGGUUGU	GGUUGU	176.1	105.6	1.66761
	UGAGGUAGUAGGUUGUA	GUUGUA	316.1	215	1.47023
	UGAGGUAGUAGGUUGUAU	UUGUAU	932	614	1.51792
	UGAGGUAGUAGGUUGUAUA	UGUAUA	1162	697.4	1.66619
	UGAGGUAGUAGGUUGUAUAG	GUAUAG	1891.1	1525.4	1.23974
	UGAGGUAGUAGGUUGUAUAGU	UAUAGU	12770.1	9093.9	1.40425
	UGAGGUAGUAGGUUGUAUAGUU	AUAGUU	214530	103456	2.07364
	UGAGGUAGUAGGUUGUAUAGUUU	UAGUUU	15061.6	6899.8	2.1829
	UGAGGUAGUAGGUUGUAUAGUUUG	AGUUUG	11.1	4.2	2.64286
	UGAGGUAGUAGGUUGUAUAGUUUGG	GUUUGG	2.3	0	∞
	GAGGUAGUAGGUUGUAUA	UGUAUA	2.8	1	2.8
	GAGGUAGUAGGUUGUAUAG	GUAUAG	6.8	3.4	2
	GAGGUAGUAGGUUGUAUAGU	UAUAGU	25.7	17.6	1.46023
	GAGGUAGUAGGUUGUAUAGUU	AUAGUU	471.1	201.2	2.34145
	GAGGUAGUAGGUUGUAUAGUUU	UAGUUU	47	17.9	2.6257
	AGGUAGUAGGUUGUAUAGUU	AUAGUU	21.4	15.2	1.40789
	AGGUAGUAGGUUGUAUAGUUU	UAGUUU	3	1.2	2.5
	AGGUAGUAGGUUGUAUAGUUUG	AGUUUG	4.1	1.2	3.41667
	GGUAGUAGGUUGUAUAGUU	AUAGUU	18.8	5.4	3.48148
	GGUAGUAGGUUGUAUAGUUUG	AGUUUG	16.2	2	8.1
	GUAGUAGGUUGUAUAGUU	AUAGUU	3.8	1.2	3.16667
	GUAGUAGGUUGUAUAGUUUG	AGUUUG	1.9	1	1.9
hsa-let-7b
	GGUGAGGUAGUAGGUUGUGU	UUGUGU	1.9	1	1.9
	UGAGGUAGUAGGUUGU	GGUUGU	176.1	105.6	1.66761
	UGAGGUAGUAGGUUGUG	GUUGUG	483.7	280.2	1.72627
	UGAGGUAGUAGGUUGUGU	UUGUGU	1462.8	611.6	2.39176
	UGAGGUAGUAGGUUGUGUG	UGUGUG	2200.2	1366.3	1.61033
	UGAGGUAGUAGGUUGUGUGG	GUGUGG	2949	2359.6	1.24979
	UGAGGUAGUAGGUUGUGUGGU	UGUGGU	12372.5	10805.9	1.14498
	UGAGGUAGUAGGUUGUGUGGUU	GUGGUU	127670	96360.2	1.32492
	UGAGGUAGUAGGUUGUGUGGUUU	UGGUUU	49054.6	35077.7	1.39846
	UGAGGUAGUAGGUUGUGUGGUUUC	GGUUUC	68.8	55.9	1.23077
	UGAGGUAGUAGGUUGUGUGGUUUCA	GUUUCA	18.2	14.7	1.2381
	GAGGUAGUAGGUUGUGUG	UGUGUG	3.9	0.7	5.57143
	GAGGUAGUAGGUUGUGUGG	GUGUGG	4.5	2.7	1.66667
	GAGGUAGUAGGUUGUGUGGU	UGUGGU	18.6	10.5	1.77143
	GAGGUAGUAGGUUGUGUGGUU	GUGGUU	170.4	109.3	1.55901
	GAGGUAGUAGGUUGUGUGGUUU	UGGUUU	73.5	42.9	1.71329
	AGGUAGUAGGUUGUGUGGU	UGUGGU	2.8	1.5	1.86667
	AGGUAGUAGGUUGUGUGGUU	GUGGUU	10.9	8.6	1.26744
	AGGUAGUAGGUUGUGUGGUUU	UGGUUU	6.6	4.4	1.5
	GGUAGUAGGUUGUGUGGU	UGUGGU	4.7	0.5	9.4
	GGUAGUAGGUUGUGUGGUU	GUGGUU	15.4	3.9	3.94872
	GGUAGUAGGUUGUGUGGUUU	UGGUUU	5.6	1.5	3.73333
	GUAGUAGGUUGUGUGGUU	GUGGUU	3.9	0.7	5.57143
	UAGUAGGUUGUGUGGUU	GUGGUU	6.2	2	3.1
	UAGUAGGUUGUGUGGUUU	UGGUUU	2.6	0.2	13
hsa-let-7c
	GGUUGAGGUAGUAGGUUGU	GGUUGU	3	0.5	6
	GUUGAGGUAGUAGGUUGUAUGGU	UAUGGU	1.9	0.2	9.5
	GUUGAGGUAGUAGGUUGUAUGGUU	AUGGUU	4.5	2.7	1.66667
	UUGAGGUAGUAGGUUGU	GGUUGU	8.3	6.1	1.36066
	UUGAGGUAGUAGGUUGUAUGGU	UAUGGU	18.8	9.6	1.95833
	UUGAGGUAGUAGGUUGUAUGGUU	AUGGUU	30.3	14.7	2.06122
	UUGAGGUAGUAGGUUGUAUGGUUU	UGGUUU	3.8	2	1.9
	UGAGGUAGUAGGUUGU	GGUUGU	176.1	105.6	1.66761
	UGAGGUAGUAGGUUGUA	GUUGUA	316.1	215	1.47023
	UGAGGUAGUAGGUUGUAU	UUGUAU	932	614	1.51792
	UGAGGUAGUAGGUUGUAUG	UGUAUG	57.9	41.2	1.40534
	UGAGGUAGUAGGUUGUAUGG	GUAUGG	127.8	83.3	1.53421
	UGAGGUAGUAGGUUGUAUGGU	UAUGGU	742.2	531.4	1.39669
	UGAGGUAGUAGGUUGUAUGGUU	AUGGUU	9087.4	5581.5	1.62813
	UGAGGUAGUAGGUUGUAUGGUUU	UGGUUU	945	491.7	1.9219
	UGAGGUAGUAGGUUGUAUGGUUUA	GGUUUA	28.7	17.4	1.64943
	GAGGUAGUAGGUUGUAUGGU	UAUGGU	3.4	1	3.4
	GAGGUAGUAGGUUGUAUGGUU	AUGGUU	24.8	14.7	1.68707
	GAGGUAGUAGGUUGUAUGGUUU	UGGUUU	2.3	1.5	1.53333
hsa-let-7d
	AAGAGGUAGUAGGUUGCAUAGUU	AUAGUU	3.8	2.2	1.72727
	AGAGGUAGUAGGUUGC	GGUUGC	5.3	9.3	0.569892
	AGAGGUAGUAGGUUGCA	GUUGCA	69.3	20.6	3.36408
	AGAGGUAGUAGGUUGCAU	UUGCAU	105.8	58.8	1.79932
	AGAGGUAGUAGGUUGCAUA	UGCAUA	101.8	73.3	1.38881
	AGAGGUAGUAGGUUGCAUAG	GCAUAG	184.7	120.8	1.52897
	AGAGGUAGUAGGUUGCAUAGU	CAUAGU	572.7	385.8	1.48445
	AGAGGUAGUAGGUUGCAUAGUU	AUAGUU	11222.8	6486.5	1.73018
	AGAGGUAGUAGGUUGCAUAGUUU	UAGUUU	1094	593.2	1.84423
	AGAGGUAGUAGGUUGCAUAGUUUU	AGUUUU	32.7	18.9	1.73016
	GAGGUAGUAGGUUGCAUA	UGCAUA	0	3.4	0
	GAGGUAGUAGGUUGCAUAGUU	AUAGUU	20.7	12.5	1.656
	AGGUAGUAGGUUGCAUAGUU	AUAGUU	5.8	2.5	2.32
	CUAUACGACCUGCUGCCUUUC	CCUUUC	0.4	2.7	0.148148
	CUAUACGACCUGCUGCCUUUCU	CUUUCU	2.1	10.5	0.2
	UAUACGACCUGCUGCCUUUCU	CUUUCU	0.4	2.5	0.16
hsa-let-7e
	UGAGGUAGGAGGUUGU	GGUUGU	2.6	2.7	0.962963
	UGAGGUAGGAGGUUGUA	GUUGUA	14.5	15.7	0.923567
	UGAGGUAGGAGGUUGUAU	UUGUAU	31.6	29.4	1.07483
	UGAGGUAGGAGGUUGUAUA	UGUAUA	19.5	19.1	1.02094
	UGAGGUAGGAGGUUGUAUAG	GUAUAG	70.1	72.3	0.969571
	UGAGGUAGGAGGUUGUAUAGU	UAUAGU	371.9	331.4	1.12221
	UGAGGUAGGAGGUUGUAUAGUU	AUAGUU	3528.3	2391	1.47566
	UGAGGUAGGAGGUUGUAUAGUUG	UAGUUG	225.3	179.9	1.25236
	UGAGGUAGGAGGUUGUAUAGUUGA	AGUUGA	19.2	11.5	1.66957
	GAGGUAGGAGGUUGUAUAGUU	AUAGUU	9.6	5.1	1.88235
	GGUAGGAGGUUGUAUAGUU	AUAGUU	1.9	0	∞
	AGGUUGUAUAGUUGAGG	UUGAGG	2.6	0.5	5.2
hsa-let-7f-1
	UGAGGUAGUAGAUUGU	GAUUGU	23.3	45.8	0.508734
	UGAGGUAGUAGAUUGUA	AUUGUA	177.9	142.2	1.25105
	UGAGGUAGUAGAUUGUAU	UUGUAU	527.8	369.4	1.4288
	UGAGGUAGUAGAUUGUAUA	UGUAUA	578.2	384.1	1.50534
	UGAGGUAGUAGAUUGUAUAG	GUAUAG	879.4	672.6	1.30746
	UGAGGUAGUAGAUUGUAUAGU	UAUAGU	5644.6	3374.4	1.67277
	UGAGGUAGUAGAUUGUAUAGUU	AUAGUU	120792	57411.2	2.10397
	UGAGGUAGUAGAUUGUAUAGUUG	UAGUUG	696.7	335.6	2.07598
	UGAGGUAGUAGAUUGUAUAGUUGU	AGUUGU	35.1	18.9	1.85714
	UGAGGUAGUAGAUUGUAUAGUUGUG	GUUGUG	4.1	1	4.1
	UGAGGUAGUAGAUUGUAUAGUUGUGG	UUGUGG	3.9	0.5	7.8
	UGAGGUAGUAGAUUGUAUAGUUGUGGG	UGUGGG	3.2	0.5	6.4
	GAGGUAGUAGAUUGUAU	UUGUAU	1.9	1	1.9
	GAGGUAGUAGAUUGUAUA	UGUAUA	3.4	1.2	2.83333
	GAGGUAGUAGAUUGUAUAG	GUAUAG	5.1	2.5	2.04
	GAGGUAGUAGAUUGUAUAGU	UAUAGU	25.2	12.7	1.98425
	GAGGUAGUAGAUUGUAUAGUU	AUAGUU	499.1	230.9	2.16154
	GAGGUAGUAGAUUGUAUAGUUG	UAGUUG	2.3	1.2	1.91667
	AGGUAGUAGAUUGUAUAGUU	AUAGUU	25.2	12	2.1
	AGGUAGUAGAUUGUAUAGUUGU	AGUUGU	3.2	1	3.2
	GGUAGUAGAUUGUAUAGUU	AUAGUU	4.1	2.7	1.51852
hsa-let-7f-2
	AUGAGGUAGUAGAUUGUAUAGU	UAUAGU	7.3	4.7	1.55319
	AUGAGGUAGUAGAUUGUAUAGUU	AUAGUU	69.1	27.2	2.54044
	AUGAGGUAGUAGAUUGUAUAGUUU	UAGUUU	3	2.5	1.2
	UGAGGUAGUAGAUUGU	GAUUGU	23.3	45.8	0.508734
	UGAGGUAGUAGAUUGUA	AUUGUA	177.9	142.2	1.25105
	UGAGGUAGUAGAUUGUAU	UUGUAU	527.8	369.4	1.4288
	UGAGGUAGUAGAUUGUAUA	UGUAUA	578.2	384.1	1.50534
	UGAGGUAGUAGAUUGUAUAG	GUAUAG	879.4	672.6	1.30746
	UGAGGUAGUAGAUUGUAUAGU	UAUAGU	5644.6	3374.4	1.67277
	UGAGGUAGUAGAUUGUAUAGUU	AUAGUU	120792	57411.2	2.10397
	UGAGGUAGUAGAUUGUAUAGUUU	UAGUUU	4682	1876.7	2.4948
	UGAGGUAGUAGAUUGUAUAGUUUU	AGUUUU	65.6	27.5	2.38545
	GAGGUAGUAGAUUGUAU	UUGUAU	1.9	1	1.9
	GAGGUAGUAGAUUGUAUA	UGUAUA	3.4	1.2	2.83333
	GAGGUAGUAGAUUGUAUAG	GUAUAG	5.1	2.5	2.04
	GAGGUAGUAGAUUGUAUAGU	UAUAGU	25.2	12.7	1.98425
	GAGGUAGUAGAUUGUAUAGUU	AUAGUU	499.1	230.9	2.16154
	GAGGUAGUAGAUUGUAUAGUUU	UAGUUU	28	11.5	2.43478
	AGGUAGUAGAUUGUAUAGUU	AUAGUU	25.2	12	2.1
	GGUAGUAGAUUGUAUAGUU	AUAGUU	4.1	2.7	1.51852
	GGUAGUAGAUUGUAUAGUUU	UAGUUU	9.6	3.7	2.59459
hsa-let-7g
	CUGAGGUAGUAGUUUGUACAGU	UACAGU	3	1.7	1.76471
	CUGAGGUAGUAGUUUGUACAGUU	ACAGUU	35.9	21.3	1.68545
	UGAGGUAGUAGUUUGU	GUUUGU	3.6	2	1.8
	UGAGGUAGUAGUUUGUA	UUUGUA	47.2	26	1.81538
	UGAGGUAGUAGUUUGUAC	UUGUAC	62.2	63.2	0.984177
	UGAGGUAGUAGUUUGUACA	UGUACA	29.1	20.1	1.44776
	UGAGGUAGUAGUUUGUACAG	GUACAG	57.7	47.6	1.21218
	UGAGGUAGUAGUUUGUACAGU	UACAGU	636.4	490.7	1.29692
	UGAGGUAGUAGUUUGUACAGUU	ACAGUU	14961.9	8304.6	1.80164
	UGAGGUAGUAGUUUGUACAGUUU	CAGUUU	520.1	276	1.88442
	GAGGUAGUAGUUUGUACAGUU	ACAGUU	26.9	15.9	1.69182
	AGGUAGUAGUUUGUACAGUU	ACAGUU	2.6	0.5	5.2
hsa-let-7i
	CUGAGGUAGUAGUUUGUGCUGUU	GCUGUU	1.9	0.7	2.71429
	UGAGGUAGUAGUUUGU	GUUUGU	3.6	2	1.8
	UGAGGUAGUAGUUUGUG	UUUGUG	8.3	4.7	1.76596
	UGAGGUAGUAGUUUGUGC	UUGUGC	41.2	19.1	2.15707
	UGAGGUAGUAGUUUGUGCU	UGUGCU	157.7	104.9	1.50334
	UGAGGUAGUAGUUUGUGCUG	GUGCUG	191.8	150.3	1.27611
	UGAGGUAGUAGUUUGUGCUGU	UGCUGU	823.4	581.7	1.41551
	UGAGGUAGUAGUUUGUGCUGUU	GCUGUU	8103.7	4465.4	1.81478
	UGAGGUAGUAGUUUGUGCUGUUG	CUGUUG	58.8	31.1	1.89068
	GAGGUAGUAGUUUGUGCUGU	UGCUGU	2.3	1.2	1.91667
	GAGGUAGUAGUUUGUGCUGUU	GCUGUU	12.4	5.6	2.21429
hsa-mir-1-1
	UGGAAUGUAAAGAAGUAUGUAU	AUGUAU	43.4	12.5	3.472
hsa-mir-1-2
	UGGAAUGUAAAGAAGUAUGUAU	AUGUAU	43.4	12.5	3.472
hsa-mir-100
	AACCCGUAGAUCCGAAC	CCGAAC	2.1	4.2	0.5
	AACCCGUAGAUCCGAACUUG	AACUUG	1.9	3.7	0.513514
	AACCCGUAGAUCCGAACUUGU	ACUUGU	27.2	23.5	1.15745
	AACCCGUAGAUCCGAACUUGUG	CUUGUG	225.9	210.3	1.07418
	AACCCGUAGAUCCGAACUUGUGG	UUGUGG	3.4	3.7	0.918919
hsa-mir-101-1
	GUACAGUACUGUGAUAACU	AUAACU	2.1	1	2.1
	GUACAGUACUGUGAUAACUG	UAACUG	3.6	2.7	1.33333
	GUACAGUACUGUGAUAACUGA	AACUGA	75.5	36.8	2.05163
	GUACAGUACUGUGAUAACUGAA	ACUGAA	171.4	85.3	2.00938
	UACAGUACUGUGAUAACUGA	AACUGA	27.4	12	2.28333
	UACAGUACUGUGAUAACUGAA	ACUGAA	131.9	47.8	2.75941
	UACAGUACUGUGAUAACUGAAG	CUGAAG	32.1	15.9	2.01887
hsa-mir-101-2
	GUACAGUACUGUGAUAACU	AUAACU	2.1	1	2.1
	GUACAGUACUGUGAUAACUG	UAACUG	3.6	2.7	1.33333
	GUACAGUACUGUGAUAACUGA	AACUGA	75.5	36.8	2.05163
	GUACAGUACUGUGAUAACUGAA	ACUGAA	171.4	85.3	2.00938
	UACAGUACUGUGAUAACUGA	AACUGA	27.4	12	2.28333
	UACAGUACUGUGAUAACUGAA	ACUGAA	131.9	47.8	2.75941
	UACAGUACUGUGAUAACUGAAG	CUGAAG	32.1	15.9	2.01887
	UACAGUACUGUGAUAACUGAAGA	UGAAGA	6.4	3.2	2
	UACAGUACUGUGAUAACUGAAGAA	GAAGAA	2.8	1.5	1.86667
hsa-mir-103-1
	AAGCAGCAUUGUACAGGGCUAU	GGCUAU	3.6	0.7	5.14286
	AGCAGCAUUGUACAGG	UACAGG	3.2	2.7	1.18519
	AGCAGCAUUGUACAGGG	ACAGGG	21.2	15.7	1.35032
	AGCAGCAUUGUACAGGGC	CAGGGC	36.3	20.1	1.80597
	AGCAGCAUUGUACAGGGCU	AGGGCU	64.6	48.3	1.33747
	AGCAGCAUUGUACAGGGCUA	GGGCUA	297.5	175.3	1.69709
	AGCAGCAUUGUACAGGGCUAU	GGCUAU	3724.8	2562.8	1.45341
	AGCAGCAUUGUACAGGGCUAUG	GCUAUG	3042.9	2010	1.51388
	AGCAGCAUUGUACAGGGCUAUGA	CUAUGA	8420.5	4075.7	2.06603
	AGCAGCAUUGUACAGGGCUAUGAA	UAUGAA	480.3	262.8	1.82763
	AGCAGCAUUGUACAGGGCUAUGAAG	AUGAAG	2.3	0.5	4.6
	CAGCAUUGUACAGGGCUAU	GGCUAU	4.7	2.5	1.88
	CAGCAUUGUACAGGGCUAUG	GCUAUG	13.5	7.1	1.90141
	CAGCAUUGUACAGGGCUAUGA	CUAUGA	58.3	35.1	1.66097
	CAGCAUUGUACAGGGCUAUGAA	UAUGAA	2.1	0.7	3
	AGCAUUGUACAGGGCUAU	GGCUAU	2.8	1	2.8
	AGCAUUGUACAGGGCUAUG	GCUAUG	2.1	2.9	0.724138
	AGCAUUGUACAGGGCUAUGA	CUAUGA	8.1	2.5	3.24
hsa-mir-103-2
	AAGCAGCAUUGUACAGGGCUAU	GGCUAU	3.6	0.7	5.14286
	AGCAGCAUUGUACAGG	UACAGG	3.2	2.7	1.18519
	AGCAGCAUUGUACAGGG	ACAGGG	21.2	15.7	1.35032
	AGCAGCAUUGUACAGGGC	CAGGGC	36.3	20.1	1.80597
	AGCAGCAUUGUACAGGGCU	AGGGCU	64.6	48.3	1.33747
	AGCAGCAUUGUACAGGGCUA	GGGCUA	297.5	175.3	1.69709
	AGCAGCAUUGUACAGGGCUAU	GGCUAU	3724.8	2562.8	1.45341
	AGCAGCAUUGUACAGGGCUAUG	GCUAUG	3042.9	2010	1.51388
	AGCAGCAUUGUACAGGGCUAUGA	CUAUGA	8420.5	4075.7	2.06603
	AGCAGCAUUGUACAGGGCUAUGAA	UAUGAA	480.3	262.8	1.82763
	AGCAGCAUUGUACAGGGCUAUGAAA	AUGAAA	533.8	265.5	2.01055
	CAGCAUUGUACAGGGCUAU	GGCUAU	4.7	2.5	1.88
	CAGCAUUGUACAGGGCUAUG	GCUAUG	13.5	7.1	1.90141
	CAGCAUUGUACAGGGCUAUGA	CUAUGA	58.3	35.1	1.66097
	CAGCAUUGUACAGGGCUAUGAA	UAUGAA	2.1	0.7	3
	CAGCAUUGUACAGGGCUAUGAAA	AUGAAA	4.9	3.2	1.53125
	AGCAUUGUACAGGGCUAU	GGCUAU	2.8	1	2.8
	AGCAUUGUACAGGGCUAUG	GCUAUG	2.1	2.9	0.724138
	AGCAUUGUACAGGGCUAUGA	CUAUGA	8.1	2.5	3.24
hsa-mir-105-1
	AAAUGCUCAGACUCCUGUGGUG	GUGGUG	2.8	2.5	1.12
	CCACGGAUGUUUGAGCAUGUG	CAUGUG	8.6	2.9	2.96552
hsa-mir-105-2
	AAAUGCUCAGACUCCUGUGGUG	GUGGUG	2.8	2.5	1.12
	CCACGGAUGUUUGAGCAUGUG	CAUGUG	8.6	2.9	2.96552
hsa-mir-106b
	UAAAGUGCUGACAGUGCA	AGUGCA	2.4	1.5	1.6
	UAAAGUGCUGACAGUGCAG	GUGCAG	3	3.7	0.810811
	UAAAGUGCUGACAGUGCAGA	UGCAGA	19.7	21.8	0.90367
	UAAAGUGCUGACAGUGCAGAU	GCAGAU	144.3	148.3	0.973028
	UAAAGUGCUGACAGUGCAGAUA	CAGAUA	255.4	257.1	0.993388
	UAAAGUGCUGACAGUGCAGAUAG	AGAUAG	5.1	4.9	1.04082
	UAAAGUGCUGACAGUGCAGAUAGU	GAUAGU	1.9	1.2	1.58333
	UACCGCACUGUGGGUACUUGCU	CUUGCU	3.2	4.7	0.680851
	CCGCACUGUGGGUACUUGCU	CUUGCU	5.3	2.5	2.12
	CCGCACUGUGGGUACUUGCUG	UUGCUG	17.7	14.7	1.20408
	CCGCACUGUGGGUACUUGCUGC	UGCUGC	16.7	15.9	1.05031
hsa-mir-107
	AAGCAGCAUUGUACAGGGCUAU	GGCUAU	3.6	0.7	5.14286
	AGCAGCAUUGUACAGG	UACAGG	3.2	2.7	1.18519
	AGCAGCAUUGUACAGGG	ACAGGG	21.2	15.7	1.35032
	AGCAGCAUUGUACAGGGC	CAGGGC	36.3	20.1	1.80597
	AGCAGCAUUGUACAGGGCU	AGGGCU	64.6	48.3	1.33747
	AGCAGCAUUGUACAGGGCUA	GGGCUA	297.5	175.3	1.69709
	AGCAGCAUUGUACAGGGCUAU	GGCUAU	3724.8	2562.8	1.45341
	AGCAGCAUUGUACAGGGCUAUC	GCUAUC	454.4	326.5	1.39173
	AGCAGCAUUGUACAGGGCUAUCA	CUAUCA	554.7	359.4	1.54341
	AGCAGCAUUGUACAGGGCUAUCAA	UAUCAA	7.1	2	3.55
	CAGCAUUGUACAGGGCUAU	GGCUAU	4.7	2.5	1.88
	AGCAUUGUACAGGGCUAU	GGCUAU	2.8	1	2.8
hsa-mir-10a
	UACCCUGUAGAUCCGAAU	CCGAAU	3.4	2.5	1.36
	UACCCUGUAGAUCCGAAUU	CGAAUU	2.4	2.5	0.96
	UACCCUGUAGAUCCGAAUUUG	AAUUUG	5.8	4.9	1.18367
	UACCCUGUAGAUCCGAAUUUGU	AUUUGU	158.2	86.5	1.8289
	UACCCUGUAGAUCCGAAUUUGUG	UUUGUG	118.4	71.3	1.66059
	UACCCUGUAGAUCCGAAUUUGUGU	UUGUGU	11.8	7.1	1.66197
	ACCCUGUAGAUCCGAAUUUGU	AUUUGU	2.1	2.2	0.954545
	ACCCUGUAGAUCCGAAUUUGUG	UUUGUG	4.9	5.4	0.907407
	ACCCUGUAGAUCCGAAUUUGUGU	UUGUGU	1.9	1.7	1.11765
	CAAAUUCGUAUCUAGGGGAAU	GGGAAU	0.6	3.7	0.162162
hsa-mir-1181
	AGGCAAGAUGGUGGACUA	GGACUA	3.9	0.2	19.5
hsa-mir-122
	UGGAGUGUGACAAUGGUGUUU	GUGUUU	6.8	10.3	0.660194
	UGGAGUGUGACAAUGGUGUUUG	UGUUUG	5.8	5.4	1.07407
hsa-mir-1246
	AAUGGAUUUUUGGAGCAGG	AGCAGG	1.3	2.9	0.448276
hsa-mir-1250
	ACGGUGCUGGAUGUGGCCUUU	GCCUUU	2.3	2.2	1.04545
hsa-mir-1254
	AGCCUGGAAGCUGGAGCCUGCAGU	UGCAGU	2.8	1.2	2.33333
	AGCCUGGAAGCUGGAGCCUGCAGUG	GCAGUG	3	2	1.5
hsa-mir-1255a
	AGGAUGAGCAAAGAAAGUAGAU	GUAGAU	4.3	1.5	2.86667
	AGGAUGAGCAAAGAAAGUAGAUU	UAGAUU	10.1	4.4	2.29545
hsa-mir-1255b-1
	CGGAUGAGCAAAGAAAGUGGUU	GUGGUU	6.8	3.2	2.125
hsa-mir-1255b-2
	CGGAUGAGCAAAGAAAGUGGUU	GUGGUU	6.8	3.2	2.125
hsa-mir-1256
	AGGCAUUGACUUCUCACUAGCU	CUAGCU	1.9	0.7	2.71429
hsa-mir-1259
	AUAUAUGAUGACUUAGC	CUUAGC	6.2	0.7	8.85714
	AUAUAUGAUGACUUAGCUU	UAGCUU	1.9	0.7	2.71429
	AUAUAUGAUGACUUAGCUUU	AGCUUU	3.6	0	∞
	AUAUAUGAUGACUUAGCUUUU	GCUUUU	6.2	0.7	8.85714
	AUAUAUGAUGACUUAGCUUUUU	CUUUUU	6.4	0	∞
	AUAUAUGAUGACUUAGCUUUUUU	UUUUUU	9	0.7	12.8571
	AUAUAUGAUGACUUAGCUUUUUUC	UUUUUC	6.8	0	∞
	AUAUAUGAUGACUUAGCUUUUUUCC	UUUUCC	5.1	0	∞
	AUAUAUGAUGACUUAGCUUUUUUCCC	UUUCCC	3.2	0.7	4.57143
	AUAUAUGAUGACUUAGCUUUUUUCCCC	UUCCCC	2.4	0	∞
hsa-mir-125a
	UCCCUGAGACCCUUUAACCUGU	ACCUGU	7.1	7.8	0.910256
	UCCCUGAGACCCUUUAACCUGUG	CCUGUG	10.7	18.9	0.566138
	UCCCUGAGACCCUUUAACCUGUGA	CUGUGA	3.9	7.1	0.549296
	ACAGGUGAGGUUCUUGGGAG	UGGGAG	1.7	2.7	0.62963
hsa-mir-125b-1
	UCCCUGAGACCCUAACUUGUG	CUUGUG	7.1	7.8	0.910256
	UCCCUGAGACCCUAACUUGUGA	UUGUGA	70.7	70.1	1.00856
	ACGGGUUAGGCUCUUGGGAG	UGGGAG	2.6	2	1.3
hsa-mir-125b-2
	UCCCUGAGACCCUAACUUGUG	CUUGUG	7.1	7.8	0.910256
	UCCCUGAGACCCUAACUUGUGA	UUGUGA	70.7	70.1	1.00856
hsa-mir-126
	CAUUAUUACUUUUGGUACGCG	UACGCG	4.5	8.1	0.555556
	UCGUACCGUGAGUAAUAAUGCG	AAUGCG	2.3	2.2	1.04545
	CGUACCGUGAGUAAUAAUGCG	AAUGCG	5.1	10.3	0.495146
hsa-mir-1262
	AUGGGUGAAUUUGUAGAAGGAU	AAGGAU	4.3	0.7	6.14286
hsa-mir-1266
	CCUCAGGGCUGUAGAACAGGGCU	AGGGCU	2.6	3.7	0.702703
hsa-mir-1268
	CGGGCGUGGUGGUGGGGG	UGGGGG	0	2.5	0
hsa-mir-1274a
	GUCCCUGUUCAGGCGCCA	GCGCCA	0.2	5.6	0.0357143
hsa-mir-1274b
	GUCCCUGUUCGGGCGCCA	GCGCCA	0.9	25.7	0.0350195
	UCCCUGUUCGGGCGCC	GGCGCC	2.6	2.9	0.896552
	UCCCUGUUCGGGCGCCA	GCGCCA	14.8	85.1	0.173913
	CCCUGUUCGGGCGCCA	GCGCCA	3.4	34.6	0.0982659
hsa-mir-1278
	UAGUACUGUGCAUAUCAUCU	UCAUCU	2.3	2.5	0.92
	UAGUACUGUGCAUAUCAUCUA	CAUCUA	1.9	2.7	0.703704
	UAGUACUGUGCAUAUCAUCUAU	AUCUAU	24.1	20.6	1.1699
hsa-mir-128-1
	UCACAGUGAACCGGUC	CCGGUC	1.5	2.7	0.555556
	UCACAGUGAACCGGUCU	CGGUCU	26.1	17.9	1.4581
	UCACAGUGAACCGGUCUC	GGUCUC	5.6	5.9	0.949153
	UCACAGUGAACCGGUCUCU	GUCUCU	15	22.8	0.657895
	UCACAGUGAACCGGUCUCUU	UCUCUU	77.2	89.2	0.865471
	UCACAGUGAACCGGUCUCUUU	CUCUUU	752.2	657.4	1.1442
	UCACAGUGAACCGGUCUCUUUU	UCUUUU	159.3	121.8	1.30788
	UCACAGUGAACCGGUCUCUUUUU	CUUUUU	11.5	6.4	1.79688
	ACAGUGAACCGGUCUCUUU	CUCUUU	2.1	0.5	4.2
hsa-mir-128-2
	UCACAGUGAACCGGUC	CCGGUC	1.5	2.7	0.555556
	UCACAGUGAACCGGUCU	CGGUCU	26.1	17.9	1.4581
	UCACAGUGAACCGGUCUC	GGUCUC	5.6	5.9	0.949153
	UCACAGUGAACCGGUCUCU	GUCUCU	15	22.8	0.657895
	UCACAGUGAACCGGUCUCUU	UCUCUU	77.2	89.2	0.865471
	UCACAGUGAACCGGUCUCUUU	CUCUUU	752.2	657.4	1.1442
	ACAGUGAACCGGUCUCUUU	CUCUUU	2.1	0.5	4.2
hsa-mir-1285-1
	UCUGGGCAACAAAGUGAGACCU	AGACCU	19	5.9	3.22034
	UCUGGGCAACAAAGUGAGACCUU	GACCUU	7.9	1.7	4.64706
hsa-mir-1285-2
	UCUGGGCAACAAAGUGAGACCU	AGACCU	19	5.9	3.22034
hsa-mir-1287
	UGCUGGAUCAGUGGUUCGAGU	UCGAGU	3.2	2.9	1.10345
	UGCUGGAUCAGUGGUUCGAGUC	CGAGUC	9.6	7.4	1.2973
hsa-mir-1292
	UGGGAACGGGUUCCGGCAGACGCUG	ACGCUG	2.1	2.7	0.777778
hsa-mir-1293
	UCUGGGUGGUCUGGAGAUUUGU	AUUUGU	8.3	2.9	2.86207
	UCUGGGUGGUCUGGAGAUUUGUG	UUUGUG	18	9.3	1.93548
	CUGGGUGGUCUGGAGAUUUGUG	UUUGUG	1.7	3.2	0.53125
	UGGGUGGUCUGGAGAUUUGUGCA	UGUGCA	3.6	1.7	2.11765
	GGGUGGUCUGGAGAUUUGUGCA	UGUGCA	2.6	2.2	1.18182
	GGUGGUCUGGAGAUUUGUGCA	UGUGCA	0.9	2.5	0.36
	GUGGUCUGGAGAUUUGUGCAG	GUGCAG	3.4	2	1.7
	UCUGGAGAUUUGUGCAGCUUGU	GCUUGU	1.9	2.9	0.655172
hsa-mir-1301
	UUGCAGCUGCCUGGGAGUGAC	AGUGAC	3	1.7	1.76471
	UUGCAGCUGCCUGGGAGUGACU	GUGACU	1.7	6.9	0.246377
	UUGCAGCUGCCUGGGAGUGACUU	UGACUU	23.3	17.4	1.33908
	UUGCAGCUGCCUGGGAGUGACUUC	GACUUC	14.5	14.2	1.02113
	UUGCAGCUGCCUGGGAGUGACUUCA	ACUUCA	4.5	4.4	1.02273
	UGCAGCUGCCUGGGAGUGACUUCA	ACUUCA	2.4	2.9	0.827586
hsa-mir-1304
	CGGUUUGAGGCUACAGUGAGAU	UGAGAU	14.3	21.6	0.662037
hsa-mir-1306
	ACGUUGGCUCUGGUGGUGAU	GGUGAU	4.3	3.4	1.26471
	ACGUUGGCUCUGGUGGUGAUG	GUGAUG	9.4	6.4	1.46875
hsa-mir-1307
	UCGACCGGACCUCGACCGGC	ACCGGC	2.1	0.5	4.2
	UCGACCGGACCUCGACCGGCU	CCGGCU	35.3	19.9	1.77387
	UCGACCGGACCUCGACCGGCUC	CGGCUC	78	31.9	2.44514
	UCGACCGGACCUCGACCGGCUCG	GGCUCG	40.8	26.2	1.55725
	UCGACCGGACCUCGACCGGCUCGU	GCUCGU	2.6	1.2	2.16667
	ACUCGGCGUGGCGUCGG	CGUCGG	0.4	3.2	0.125
	ACUCGGCGUGGCGUCGGUC	UCGGUC	1.9	2	0.95
	ACUCGGCGUGGCGUCGGUCG	CGGUCG	5.1	10.3	0.495146
	ACUCGGCGUGGCGUCGGUCGU	GGUCGU	21.8	40.4	0.539604
	ACUCGGCGUGGCGUCGGUCGUG	GUCGUG	82.3	204.7	0.402052
	ACUCGGCGUGGCGUCGGUCGUGG	UCGUGG	34.2	99.8	0.342685
	ACUCGGCGUGGCGUCGGUCGUGGU	CGUGGU	9.6	16.9	0.568047
	ACUCGGCGUGGCGUCGGUCGUGGUA	GUGGUA	4.1	6.1	0.672131
	CUCGGCGUGGCGUCGGUCGU	GGUCGU	2.4	6.6	0.363636
	CUCGGCGUGGCGUCGGUCGUG	GUCGUG	8.3	32.8	0.253049
	CUCGGCGUGGCGUCGGUCGUGG	UCGUGG	10.3	37.3	0.276139
	CUCGGCGUGGCGUCGGUCGUGGU	CGUGGU	7	19.9	0.351759
hsa-mir-1308
	GCAUGGGUGGUUCAGU	UUCAGU	1.1	3.4	0.323529
	GCAUGGGUGGUUCAGUG	UCAGUG	3.2	8.1	0.395062
	GCAUGGGUGGUUCAGUGG	CAGUGG	5.3	49.5	0.107071
hsa-mir-130a
	CAGUGCAAUGUUAAAAG	UAAAAG	2.8	3.9	0.717949
	CAGUGCAAUGUUAAAAGGG	AAAGGG	2.1	1.2	1.75
	CAGUGCAAUGUUAAAAGGGC	AAGGGC	6.2	3.7	1.67568
	CAGUGCAAUGUUAAAAGGGCA	AGGGCA	34.2	18.9	1.80952
	CAGUGCAAUGUUAAAAGGGCAU	GGGCAU	337.5	219.6	1.53689
	CAGUGCAAUGUUAAAAGGGCAUU	GGCAUU	56.6	25.2	2.24603
hsa-mir-130b
	ACUCUUUCCCUGUUGCACUACU	ACUACU	0.6	3.7	0.162162
	CAGUGCAAUGAUGAAAGGGCA	AGGGCA	8.1	8.3	0.975904
	CAGUGCAAUGAUGAAAGGGCAU	GGGCAU	120.4	92.9	1.29602
	AGUGCAAUGAUGAAAGGGCAU	GGGCAU	2.3	3.4	0.676471
hsa-mir-132
	ACCGUGGCUUUCGAUUGUUACU	GUUACU	2.3	1.7	1.35294
	UAACAGUCUACAGCCAUGGU	CAUGGU	1.9	0.7	2.71429
	UAACAGUCUACAGCCAUGGUCG	UGGUCG	20.9	23.3	0.896996
	AACAGUCUACAGCCAUGGUCG	UGGUCG	2.6	2.5	1.04
	ACAGUCUACAGCCAUGGUCG	UGGUCG	2.3	3.4	0.676471
hsa-mir-135b
	UAUGGCUUUUCAUUCCUAUGU	CUAUGU	1.9	0.5	3.8
	UAUGGCUUUUCAUUCCUAUGUG	UAUGUG	2.1	1.5	1.4
	UAUGGCUUUUCAUUCCUAUGUGA	AUGUGA	13.5	5.1	2.64706
	AUGUAGGGCUAAAAGCCAUGGG	CAUGGG	1.1	3.2	0.34375
hsa-mir-137
	UUAUUGCUUAAGAAUACGCGUA	CGCGUA	2.8	0.5	5.6
	UUAUUGCUUAAGAAUACGCGUAG	GCGUAG	2.3	1.7	1.35294
hsa-mir-140
	UACCACAGGGUAGAACCA	GAACCA	2.1	2.2	0.954545
	UACCACAGGGUAGAACCAC	AACCAC	1.9	3.2	0.59375
	UACCACAGGGUAGAACCACG	ACCACG	4.1	2.9	1.41379
	UACCACAGGGUAGAACCACGG	CCACGG	62.8	105.6	0.594697
	UACCACAGGGUAGAACCACGGA	CACGGA	666.5	1149.1	0.580019
	UACCACAGGGUAGAACCACGGAC	ACGGAC	544.5	786.9	0.691956
	UACCACAGGGUAGAACCACGGACA	CGGACA	174.2	317.7	0.548316
	ACCACAGGGUAGAACCAC	AACCAC	1.9	0.7	2.71429
	ACCACAGGGUAGAACCACGG	CCACGG	97.3	77.9	1.24904
	ACCACAGGGUAGAACCACGGA	CACGGA	1125	986.9	1.13993
	ACCACAGGGUAGAACCACGGAC	ACGGAC	159.7	113	1.41327
	ACCACAGGGUAGAACCACGGACA	CGGACA	93.8	74.8	1.25401
	CCACAGGGUAGAACCACGGA	CACGGA	24.4	16.2	1.50617
	CCACAGGGUAGAACCACGGAC	ACGGAC	5.3	1.2	4.41667
	CCACAGGGUAGAACCACGGACA	CGGACA	3.8	2	1.9
hsa-mir-141
	UAACACUGUCUGGUAAAGAU	AAAGAU	1.9	1.5	1.26667
	UAACACUGUCUGGUAAAGAUG	AAGAUG	5.1	6.9	0.73913
	UAACACUGUCUGGUAAAGAUGG	AGAUGG	3.2	2.7	1.18519
	UAACACUGUCUGGUAAAGAUGGC	GAUGGC	2.1	1.7	1.23529
hsa-mir-146a
	UGAGAACUGAAUUCCAU	UUCCAU	2.6	1.2	2.16667
hsa-mir-146b
	UGAGAACUGAAUUCCAU	UUCCAU	2.6	1.2	2.16667
	UGAGAACUGAAUUCCAUAGGCU	UAGGCU	3.4	6.4	0.53125
	UGAGAACUGAAUUCCAUAGGCUG	AGGCUG	27.6	34.1	0.809384
	UGAGAACUGAAUUCCAUAGGCUGU	GGCUGU	173.4	174.8	0.991991
hsa-mir-148a
	UCAGUGCACUACAGAA	ACAGAA	2.1	0.5	4.2
	UCAGUGCACUACAGAACUUUG	ACUUUG	12.4	5.1	2.43137
	UCAGUGCACUACAGAACUUUGU	CUUUGU	41.9	8.6	4.87209
hsa-mir-148b
	GAAGUUCUGUUAUACACUCAGGCU	CAGGCU	16.3	8.8	1.85227
	AAGUUCUGUUAUACACUCAGGCU	CAGGCU	2.1	0.5	4.2
	UCAGUGCAUCACAGAA	ACAGAA	3	2.5	1.2
	UCAGUGCAUCACAGAACU	AGAACU	2.4	0	∞
	UCAGUGCAUCACAGAACUU	GAACUU	6	2	3
	UCAGUGCAUCACAGAACUUU	AACUUU	3.6	1.5	2.4
	UCAGUGCAUCACAGAACUUUG	ACUUUG	8.8	4.2	2.09524
	UCAGUGCAUCACAGAACUUUGU	CUUUGU	145.1	39	3.72051
hsa-mir-151
	CUCGAGGAGCUCACAGUCUAGU	UCUAGU	6.4	5.6	1.14286
	CUCGAGGAGCUCACAGUCUAGUA	CUAGUA	3.9	5.1	0.764706
	UCGAGGAGCUCACAGUCUAG	GUCUAG	4.7	5.6	0.839286
	UCGAGGAGCUCACAGUCUAGU	UCUAGU	68.8	62.8	1.09554
	UCGAGGAGCUCACAGUCUAGUA	CUAGUA	79.9	71.6	1.11592
	UCGAGGAGCUCACAGUCUAGUAU	UAGUAU	7.1	7.6	0.934211
	UACUAGACUGAAGCUCCUUGA	CCUUGA	2.1	2.5	0.84
	UACUAGACUGAAGCUCCUUGAG	CUUGAG	6.4	7.8	0.820513
	UACUAGACUGAAGCUCCUUGAGG	UUGAGG	7	4.7	1.48936
	UACUAGACUGAAGCUCCUUGAGGA	UGAGGA	3.9	3.9	1
	ACUAGACUGAAGCUCCUUGAGGA	UGAGGA	2.1	1.5	1.4
	CUAGACUGAAGCUCCUUGA	CCUUGA	6.6	2.5	2.64
	CUAGACUGAAGCUCCUUGAG	CUUGAG	23.3	15	1.55333
	CUAGACUGAAGCUCCUUGAGG	UUGAGG	120.3	66.7	1.8036
	CUAGACUGAAGCUCCUUGAGGA	UGAGGA	476.9	266.5	1.78949
	CUAGACUGAAGCUCCUUGAGGAC	GAGGAC	9.8	6.9	1.42029
	UAGACUGAAGCUCCUUGAGGA	UGAGGA	2.3	2.9	0.793103
	AGACUGAAGCUCCUUGAGGAC	GAGGAC	2.3	2.2	1.04545
hsa-mir-152
	UCAGUGCAUGACAGAACUU	GAACUU	2.1	2	1.05
	UCAGUGCAUGACAGAACUUG	AACUUG	2.1	0.7	3
	UCAGUGCAUGACAGAACUUGG	ACUUGG	239	99.3	2.40685
	UCAGUGCAUGACAGAACUUGGG	CUUGGG	197.9	80.2	2.46758
hsa-mir-15a
	UAGCAGCACAUAAUGGUUUG	GGUUUG	4.5	1.2	3.75
	UAGCAGCACAUAAUGGUUUGU	GUUUGU	45.5	18.6	2.44624
	UAGCAGCACAUAAUGGUUUGUG	UUUGUG	62.8	41.2	1.52427
	UAGCAGCACAUAAUGGUUUGUGG	UUGUGG	2.3	0.7	3.28571
	UAGCAGCACAUAAUGGUUUGUGGA	UGUGGA	9.4	4.9	1.91837
	UAGCAGCACAUAAUGGUUUGUGGAU	GUGGAU	1.9	0.2	9.5
hsa-mir-15b
	UAGCAGCACAUCAUGGUU	AUGGUU	1.9	1	1.9
	UAGCAGCACAUCAUGGUUU	UGGUUU	4.9	2	2.45
	UAGCAGCACAUCAUGGUUUA	GGUUUA	24.8	13.2	1.87879
	UAGCAGCACAUCAUGGUUUAC	GUUUAC	12.2	3.2	3.8125
	UAGCAGCACAUCAUGGUUUACA	UUUACA	52.6	19.1	2.75393
	CGAAUCAUUAUUUGCUGCUCU	UGCUCU	4.5	4.9	0.918367
	CGAAUCAUUAUUUGCUGCUCUA	GCUCUA	6.2	9.6	0.645833
hsa-mir-16-1
	UAGCAGCACGUAAAUAUU	AAUAUU	4.5	2.9	1.55172
	UAGCAGCACGUAAAUAUUG	AUAUUG	11.3	6.6	1.71212
	UAGCAGCACGUAAAUAUUGG	UAUUGG	10.9	6.9	1.57971
	UAGCAGCACGUAAAUAUUGGC	AUUGGC	30.4	24	1.26667
	UAGCAGCACGUAAAUAUUGGCG	UUGGCG	965.5	803	1.20237
	UAGCAGCACGUAAAUAUUGGCGU	UGGCGU	307.8	205.4	1.49854
	UAGCAGCACGUAAAUAUUGGCGUU	GGCGUU	14.3	9.6	1.48958
hsa-mir-16-2
	UAGCAGCACGUAAAUAUU	AAUAUU	4.5	2.9	1.55172
	UAGCAGCACGUAAAUAUUG	AUAUUG	11.3	6.6	1.71212
	UAGCAGCACGUAAAUAUUGG	UAUUGG	10.9	6.9	1.57971
	UAGCAGCACGUAAAUAUUGGC	AUUGGC	30.4	24	1.26667
	UAGCAGCACGUAAAUAUUGGCG	UUGGCG	965.5	803	1.20237
	UAGCAGCACGUAAAUAUUGGCGU	UGGCGU	307.8	205.4	1.49854
	UAGCAGCACGUAAAUAUUGGCGUA	GGCGUA	12.4	7.6	1.63158
	ACCAAUAUUACUGUGCUGCUU	CUGCUU	1.1	2.9	0.37931
	ACCAAUAUUACUGUGCUGCUUU	UGCUUU	6.2	24	0.258333
	ACCAAUAUUACUGUGCUGCUUUA	GCUUUA	3.2	14	0.228571
	CCAAUAUUACUGUGCUGCUUUA	GCUUUA	1.7	11	0.154545
hsa-mir-17
	UCAAAGUGCUUACAGUGCAGGUA	CAGGUA	4.1	1.5	2.73333
	UCAAAGUGCUUACAGUGCAGGUAG	AGGUAG	1.7	3.4	0.5
	CAAAGUGCUUACAGUGCA	AGUGCA	1.9	3.2	0.59375
	CAAAGUGCUUACAGUGCAG	GUGCAG	2.6	1.5	1.73333
	CAAAGUGCUUACAGUGCAGG	UGCAGG	5.6	4.7	1.19149
	CAAAGUGCUUACAGUGCAGGU	GCAGGU	19.5	13.2	1.47727
	CAAAGUGCUUACAGUGCAGGUA	CAGGUA	46.2	39	1.18462
	CAAAGUGCUUACAGUGCAGGUAG	AGGUAG	216.3	376.8	0.574045
	CAAAGUGCUUACAGUGCAGGUAGU	GGUAGU	24.2	45.8	0.528384
	ACUGCAGUGAAGGCACUUG	CACUUG	2.1	1	2.1
	ACUGCAGUGAAGGCACUUGU	ACUUGU	2.6	3.4	0.764706
	ACUGCAGUGAAGGCACUUGUA	CUUGUA	6.4	5.9	1.08475
	ACUGCAGUGAAGGCACUUGUAG	UUGUAG	148.1	90.7	1.63286
	ACUGCAGUGAAGGCACUUGUAGC	UGUAGC	46	23.3	1.97425
	ACUGCAGUGAAGGCACUUGUAGCA	GUAGCA	25.2	14.7	1.71429
	CUGCAGUGAAGGCACUUGUAG	UUGUAG	6.8	4.7	1.44681
	CUGCAGUGAAGGCACUUGUAGC	UGUAGC	6.4	3.2	2
	CUGCAGUGAAGGCACUUGUAGCA	GUAGCA	5.6	3.2	1.75
	UGCAGUGAAGGCACUUGUAG	UUGUAG	5.6	3.7	1.51351
hsa-mir-181a-1
	AACAUUCAACGCUGUCGGU	GUCGGU	3.8	2.7	1.40741
	AACAUUCAACGCUGUCGGUG	UCGGUG	7.1	5.4	1.31481
	AACAUUCAACGCUGUCGGUGA	CGGUGA	6.4	4.2	1.52381
	AACAUUCAACGCUGUCGGUGAG	GGUGAG	16.9	10.8	1.56481
	AACAUUCAACGCUGUCGGUGAGU	GUGAGU	24.1	18.9	1.27513
	AACAUUCAACGCUGUCGGUGAGUU	UGAGUU	57.1	48.3	1.18219
	AACAUUCAACGCUGUCGGUGAGUUU	GAGUUU	114.8	92.4	1.24242
hsa-mir-181a-2
	AACAUUCAACGCUGUCGGU	GUCGGU	3.8	2.7	1.40741
	AACAUUCAACGCUGUCGGUG	UCGGUG	7.1	5.4	1.31481
	AACAUUCAACGCUGUCGGUGA	CGGUGA	6.4	4.2	1.52381
	AACAUUCAACGCUGUCGGUGAG	GGUGAG	16.9	10.8	1.56481
	AACAUUCAACGCUGUCGGUGAGU	GUGAGU	24.1	18.9	1.27513
	AACAUUCAACGCUGUCGGUGAGUU	UGAGUU	57.1	48.3	1.18219
	AACAUUCAACGCUGUCGGUGAGUUU	GAGUUU	114.8	92.4	1.24242
	ACCACUGACCGUUGACUGUAC	CUGUAC	0.8	2.9	0.275862
	ACCACUGACCGUUGACUGUACC	UGUACC	1.7	2.7	0.62963
hsa-mir-181b-1
	AACAUUCAUUGCUGUCGG	UGUCGG	2.3	1.7	1.35294
	AACAUUCAUUGCUGUCGGU	GUCGGU	11.1	3.4	3.26471
	AACAUUCAUUGCUGUCGGUG	UCGGUG	21	12.3	1.70732
	AACAUUCAUUGCUGUCGGUGG	CGGUGG	11.8	5.6	2.10714
	AACAUUCAUUGCUGUCGGUGGG	GGUGGG	47.5	27.9	1.70251
	AACAUUCAUUGCUGUCGGUGGGU	GUGGGU	53.2	35.1	1.51567
	AACAUUCAUUGCUGUCGGUGGGUU	UGGGUU	185.6	119.4	1.55444
	ACAUUCAUUGCUGUCGGUGGGUU	UGGGUU	2.8	7.6	0.368421
hsa-mir-181b-2
	AACAUUCAUUGCUGUCGG	UGUCGG	2.3	1.7	1.35294
	AACAUUCAUUGCUGUCGGU	GUCGGU	11.1	3.4	3.26471
	AACAUUCAUUGCUGUCGGUG	UCGGUG	21	12.3	1.70732
	AACAUUCAUUGCUGUCGGUGG	CGGUGG	11.8	5.6	2.10714
	AACAUUCAUUGCUGUCGGUGGG	GGUGGG	47.5	27.9	1.70251
	AACAUUCAUUGCUGUCGGUGGGU	GUGGGU	53.2	35.1	1.51567
	AACAUUCAUUGCUGUCGGUGGGUU	UGGGUU	185.6	119.4	1.55444
	AACAUUCAUUGCUGUCGGUGGGUUU	GGGUUU	122.1	68.6	1.77988
	ACAUUCAUUGCUGUCGGUGGGUU	UGGGUU	2.8	7.6	0.368421
	ACAUUCAUUGCUGUCGGUGGGUUU	GGGUUU	3	3.7	0.810811
hsa-mir-181c
	AACAUUCAACCUGUCGGUGAGUU	UGAGUU	2.6	1.7	1.52941
	AACAUUCAACCUGUCGGUGAGUUU	GAGUUU	6.2	2	3.1
hsa-mir-181d
	AACAUUCAUUGUUGUCGGUG	UCGGUG	1.9	1.5	1.26667
	AACAUUCAUUGUUGUCGGUGG	CGGUGG	2.8	1.7	1.64706
	AACAUUCAUUGUUGUCGGUGGG	GGUGGG	14.5	9.6	1.51042
	AACAUUCAUUGUUGUCGGUGGGU	GUGGGU	36.8	22.3	1.65022
	AACAUUCAUUGUUGUCGGUGGGUU	UGGGUU	66	39.2	1.68367
hsa-mir-182
	UUUGGCAAUGGUAGAA	GUAGAA	5.6	3.2	1.75
	UUUGGCAAUGGUAGAACUCA	AACUCA	2.3	2	1.15
	UUUGGCAAUGGUAGAACUCACA	CUCACA	7.7	6.9	1.11594
	UUUGGCAAUGGUAGAACUCACAC	UCACAC	14.1	16.2	0.87037
	UUUGGCAAUGGUAGAACUCACACU	CACACU	46.4	29.2	1.58904
	UUUGGCAAUGGUAGAACUCACACUG	ACACUG	39.8	19.9	2
	UUUGGCAAUGGUAGAACUCACACUGG	CACUGG	35.7	20.3	1.75862
	UUUGGCAAUGGUAGAACUCACACUGGU	ACUGGU	22.7	8.3	2.73494
	AUGGUAGAACUCACACU	CACACU	2.4	5.9	0.40678
hsa-mir-1826
	AUUGAUCAUCGACACUUCG	ACUUCG	1.5	3.4	0.441176
	GCCUGUCUGAGCGUCGCU	GUCGCU	145.4	53.2	2.73308
	GCCUGUCUGAGCGUCGCUU	UCGCUU	62.9	15.2	4.13816
	CCUGUCUGAGCGUCGCU	GUCGCU	344.4	8.6	40.0465
	CCUGUCUGAGCGUCGCUU	UCGCUU	95.6	2.7	35.4074
	CUGUCUGAGCGUCGCU	GUCGCU	2.3	1.5	1.53333
hsa-mir-183
	UAUGGCACUGGUAGAAUUCACU	UUCACU	8.8	6.9	1.27536
	UAUGGCACUGGUAGAAUUCACUG	UCACUG	12.6	8.6	1.46512
	UAUGGCACUGGUAGAAUUCACUGU	CACUGU	2.8	1.2	2.33333
	AUGGCACUGGUAGAAUUCACU	UUCACU	2.4	0.5	4.8
	AUGGCACUGGUAGAAUUCACUG	UCACUG	6.2	5.1	1.21569
	UGAAUUACCGAAGGGCCAU	GGCCAU	5.4	8.3	0.650602
	UGAAUUACCGAAGGGCCAUA	GCCAUA	6.6	8.6	0.767442
	UGAAUUACCGAAGGGCCAUAA	CCAUAA	6.4	12	0.533333
hsa-mir-185
	UGGAGAGAAAGGCAGUU	GCAGUU	44.7	38.5	1.16104
	UGGAGAGAAAGGCAGUUC	CAGUUC	35.5	28.4	1.25
	UGGAGAGAAAGGCAGUUCC	AGUUCC	26.9	22.6	1.19027
	UGGAGAGAAAGGCAGUUCCU	GUUCCU	100.3	109.1	0.91934
	UGGAGAGAAAGGCAGUUCCUG	UUCCUG	169.3	151.2	1.11971
	UGGAGAGAAAGGCAGUUCCUGA	UCCUGA	5214.3	4974.8	1.04814
	UGGAGAGAAAGGCAGUUCCUGAU	CCUGAU	815.7	652.5	1.25011
	UGGAGAGAAAGGCAGUUCCUGAUG	CUGAUG	3.2	1.7	1.88235
	AGGGGCUGGCUUUCCUCUGGU	UCUGGU	1.9	2.2	0.863636
hsa-mir-186
	CCAAAGAAUUCUCCUUUUGGGCU	UGGGCU	3.8	3.9	0.974359
	CAAAGAAUUCUCCUUUUGG	UUUUGG	2.8	2.9	0.965517
	CAAAGAAUUCUCCUUUUGGG	UUUGGG	19.4	18.4	1.05435
	CAAAGAAUUCUCCUUUUGGGC	UUGGGC	5.1	8.8	0.579545
	CAAAGAAUUCUCCUUUUGGGCU	UGGGCU	17.5	44.9	0.389755
	CAAAGAAUUCUCCUUUUGGGCUU	GGGCUU	34.6	79.4	0.435768
	CAAAGAAUUCUCCUUUUGGGCUUU	GGCUUU	4.9	7.6	0.644737
	AAAGAAUUCUCCUUUUGGGCUU	GGGCUU	1.9	3.2	0.59375
hsa-mir-188
	CAUCCCUUGCAUGGUGGAGGG	GGAGGG	2.3	2	1.15
	CAUCCCUUGCAUGGUGGAGGGU	GAGGGU	2.4	2	1.2
hsa-mir-18a
	UAAGGUGCAUCUAGUGCAGAU	GCAGAU	15	10.1	1.48515
	UAAGGUGCAUCUAGUGCAGAUA	CAGAUA	6.2	1.2	5.16667
	UAAGGUGCAUCUAGUGCAGAUAG	AGAUAG	3.8	4.9	0.77551
hsa-mir-191
	CAACGGAAUCCCAAAAG	CAAAAG	23.7	19.6	1.20918
	CAACGGAAUCCCAAAAGCA	AAAGCA	11.5	6.6	1.74242
	CAACGGAAUCCCAAAAGCAG	AAGCAG	48.7	40.7	1.19656
	CAACGGAAUCCCAAAAGCAGC	AGCAGC	44.5	39.2	1.1352
	CAACGGAAUCCCAAAAGCAGCU	GCAGCU	386.1	405.2	0.952863
	CAACGGAAUCCCAAAAGCAGCUG	CAGCUG	3060	2251.5	1.35909
	CAACGGAAUCCCAAAAGCAGCUGU	AGCUGU	2790.2	2091.4	1.33413
	CAACGGAAUCCCAAAAGCAGCUGUU	GCUGUU	159.3	122.3	1.30253
	AACGGAAUCCCAAAAGCAG	AAGCAG	3.2	2.9	1.10345
	AACGGAAUCCCAAAAGCAGC	AGCAGC	2.3	2.7	0.851852
	AACGGAAUCCCAAAAGCAGCU	GCAGCU	12	19.9	0.603015
	AACGGAAUCCCAAAAGCAGCUG	CAGCUG	155	193.2	0.802277
	AACGGAAUCCCAAAAGCAGCUGU	AGCUGU	217.4	233.1	0.932647
	AACGGAAUCCCAAAAGCAGCUGUU	GCUGUU	13.2	11.8	1.11864
	ACGGAAUCCCAAAAGCAGCUGU	AGCUGU	1.9	2	0.95
	GCUGCGCUUGGAUUUCGUCCC	CGUCCC	0.2	4.2	0.047619
hsa-mir-1910
	GAGGCAGAAGCAGGAUGACA	AUGACA	3.2	4.4	0.727273
	GAGGCAGAAGCAGGAUGACAA	UGACAA	0.8	2.7	0.296296
hsa-mir-192
	CUGACCUAUGAAUUGACA	UUGACA	1.7	3.4	0.5
	CUGACCUAUGAAUUGACAG	UGACAG	4.9	4.9	1
	CUGACCUAUGAAUUGACAGC	GACAGC	52.2	59.3	0.88027
	CUGACCUAUGAAUUGACAGCC	ACAGCC	382.4	372.1	1.02768
	CUGACCUAUGAAUUGACAGCCA	CAGCCA	482	370.1	1.30235
	CUGACCUAUGAAUUGACAGCCAG	AGCCAG	8.1	4.2	1.92857
	CUGACCUAUGAAUUGACAGCCAGU	GCCAGU	10.1	3.9	2.58974
	UGACCUAUGAAUUGACAG	UGACAG	1.9	1.7	1.11765
	UGACCUAUGAAUUGACAGC	GACAGC	3.2	7.4	0.432432
	UGACCUAUGAAUUGACAGCC	ACAGCC	19.9	34.8	0.571839
	UGACCUAUGAAUUGACAGCCA	CAGCCA	158.4	171.3	0.924694
	UGACCUAUGAAUUGACAGCCAG	AGCCAG	96.8	139.7	0.692913
	UGACCUAUGAAUUGACAGCCAGU	GCCAGU	102	121.3	0.84089
	GACCUAUGAAUUGACAGCC	ACAGCC	2.6	1	2.6
	GACCUAUGAAUUGACAGCCA	CAGCCA	2.4	1.5	1.6
hsa-mir-193a
	UGGGUCUUUGCGGGCGAGAUGA	AGAUGA	10.3	18.1	0.569061
	AACUGGCCUACAAAGUCCCAG	UCCCAG	1.9	0.7	2.71429
	AACUGGCCUACAAAGUCCCAGU	CCCAGU	5.8	2.7	2.14815
hsa-mir-193b
	UCGGGGUUUUGAGGGCGAGAUG	GAGAUG	2.3	1.7	1.35294
	CGGGGUUUUGAGGGCGAGAU	CGAGAU	1.9	4.2	0.452381
	CGGGGUUUUGAGGGCGAGAUG	GAGAUG	8.5	14.5	0.586207
	CGGGGUUUUGAGGGCGAGAUGA	AGAUGA	31.4	34.8	0.902299
	AACUGGCCCUCAAAGUCCCGC	UCCCGC	1.9	1	1.9
	AACUGGCCCUCAAAGUCCCGCU	CCCGCU	10.9	4.7	2.31915
	AACUGGCCCUCAAAGUCCCGCUU	CCGCUU	1.9	0.5	3.8
hsa-mir-194-1
	UGUAACAGCAACUCCAUGUGGA	UGUGGA	1.9	2.9	0.655172
hsa-mir-194-2
	UGUAACAGCAACUCCAUGUGGA	UGUGGA	1.9	2.9	0.655172
	UGUAACAGCAACUCCAUGUGGAA	GUGGAA	11.3	24.5	0.461224
hsa-mir-195
	UAGCAGCACAGAAAUAUUGGCA	UUGGCA	5.6	2.7	2.07407
hsa-mir-196a-1
	UAGGUAGUUUCAUGUUGUUG	UUGUUG	5.1	4.4	1.15909
	UAGGUAGUUUCAUGUUGUUGG	UGUUGG	27.4	45.3	0.604857
	UAGGUAGUUUCAUGUUGUUGGG	GUUGGG	332.4	425.3	0.781566
	UAGGUAGUUUCAUGUUGUUGGGC	UUGGGC	2.1	1.2	1.75
	AGGUAGUUUCAUGUUGUUGGG	GUUGGG	1.9	2	0.95
hsa-mir-196a-2
	UAGGUAGUUUCAUGUUGUUG	UUGUUG	5.1	4.4	1.15909
	UAGGUAGUUUCAUGUUGUUGG	UGUUGG	27.4	45.3	0.604857
	UAGGUAGUUUCAUGUUGUUGGG	GUUGGG	332.4	425.3	0.781566
	UAGGUAGUUUCAUGUUGUUGGGA	UUGGGA	58.4	105.6	0.55303
	UAGGUAGUUUCAUGUUGUUGGGAU	UGGGAU	2.6	4.2	0.619048
	AGGUAGUUUCAUGUUGUUGGG	GUUGGG	1.9	2	0.95
hsa-mir-196b
	UAGGUAGUUUCCUGUUGUUG	UUGUUG	1.9	1.7	1.11765
	UAGGUAGUUUCCUGUUGUUGG	UGUUGG	10.1	17.6	0.573864
	UAGGUAGUUUCCUGUUGUUGGG	GUUGGG	66.5	94.1	0.706695
	UAGGUAGUUUCCUGUUGUUGGGA	UUGGGA	6.8	16.2	0.419753
	UAGGUAGUUUCCUGUUGUUGGGAU	UGGGAU	1.3	2.7	0.481481
hsa-mir-199a-1
	UACAGUAGUCUGCACAUUGGUU	UUGGUU	2.1	1.5	1.4
	ACAGUAGUCUGCACAUUGGUU	UUGGUU	3.8	4.7	0.808511
	ACAGUAGUCUGCACAUUGGUUA	UGGUUA	6.2	3.9	1.58974
hsa-mir-199a-2
	UACAGUAGUCUGCACAUUGGUU	UUGGUU	2.1	1.5	1.4
	ACAGUAGUCUGCACAUUGGUU	UUGGUU	3.8	4.7	0.808511
	ACAGUAGUCUGCACAUUGGUUA	UGGUUA	6.2	3.9	1.58974
hsa-mir-199b
	UACAGUAGUCUGCACAUUGGUU	UUGGUU	2.1	1.5	1.4
	ACAGUAGUCUGCACAUUGGUU	UUGGUU	3.8	4.7	0.808511
	ACAGUAGUCUGCACAUUGGUUA	UGGUUA	6.2	3.9	1.58974
hsa-mir-19a
	UGUGCAAAUCUAUGCAAAACUGA	AACUGA	2.6	1.5	1.73333
hsa-mir-19b-1
	UGUGCAAAUCCAUGCAAAACU	AAAACU	2.1	2.9	0.724138
	UGUGCAAAUCCAUGCAAAACUG	AAACUG	16.5	17.6	0.9375
	UGUGCAAAUCCAUGCAAAACUGA	AACUGA	27.6	19.4	1.42268
hsa-mir-19b-2
	UGUGCAAAUCCAUGCAAAACU	AAAACU	2.1	2.9	0.724138
	UGUGCAAAUCCAUGCAAAACUG	AAACUG	16.5	17.6	0.9375
	UGUGCAAAUCCAUGCAAAACUGA	AACUGA	27.6	19.4	1.42268
hsa-mir-200a
	UAACACUGUCUGGUAACGAU	AACGAU	2.8	2.2	1.27273
	UAACACUGUCUGGUAACGAUG	ACGAUG	3.9	6.9	0.565217
	UAACACUGUCUGGUAACGAUGU	CGAUGU	18.4	33.1	0.555891
	UAACACUGUCUGGUAACGAUGUU	GAUGUU	281.3	215.7	1.30413
	UAACACUGUCUGGUAACGAUGUUC	AUGUUC	2.1	1	2.1
	AACACUGUCUGGUAACGAUGUU	GAUGUU	5.8	5.9	0.983051
hsa-mir-200b
	CAUCUUACUGGGCAGCAUUG	GCAUUG	1.5	4.2	0.357143
	CAUCUUACUGGGCAGCAUUGG	CAUUGG	6.8	16.2	0.419753
	CAUCUUACUGGGCAGCAUUGGA	AUUGGA	10.7	36.3	0.294766
	CAUCUUACUGGGCAGCAUUGGAU	UUGGAU	2.6	6.4	0.40625
	AUCUUACUGGGCAGCAUUGGA	AUUGGA	1.5	4.2	0.357143
	UAAUACUGCCUGGUAAUGAU	AAUGAU	2.4	5.9	0.40678
	UAAUACUGCCUGGUAAUGAUG	AUGAUG	8.8	10.3	0.854369
	UAAUACUGCCUGGUAAUGAUGA	UGAUGA	52.4	90.7	0.577729
	UAAUACUGCCUGGUAAUGAUGAC	GAUGAC	348.2	419.4	0.830234
	UAAUACUGCCUGGUAAUGAUGACG	AUGACG	16.5	13	1.26923
	AAUACUGCCUGGUAAUGAUGAC	GAUGAC	11.5	34.1	0.337243
	AUACUGCCUGGUAAUGAUGAC	GAUGAC	30.1	17.4	1.72989
	AUACUGCCUGGUAAUGAUGACG	AUGACG	2.6	2.5	1.04
	AUACUGCCUGGUAAUGAUGACGG	UGACGG	1.9	2	0.95
hsa-mir-200c
	CUAAUACUGCCGGGUAAUGAUG	AUGAUG	1.3	2.5	0.52
	CUAAUACUGCCGGGUAAUGAUGG	UGAUGG	4.7	6.1	0.770492
	CUAAUACUGCCGGGUAAUGAUGGA	GAUGGA	3	6.6	0.454545
	UAAUACUGCCGGGUAAUGA	UAAUGA	9.4	14.2	0.661972
	UAAUACUGCCGGGUAAUGAU	AAUGAU	10.7	12.7	0.84252
	UAAUACUGCCGGGUAAUGAUG	AUGAUG	23.9	28.2	0.847518
	UAAUACUGCCGGGUAAUGAUGG	UGAUGG	328.1	476	0.689286
	UAAUACUGCCGGGUAAUGAUGGA	GAUGGA	1668.2	2246.3	0.742643
	UAAUACUGCCGGGUAAUGAUGGAG	AUGGAG	4.3	6.1	0.704918
	AAUACUGCCGGGUAAUGAUGGA	GAUGGA	3.8	5.4	0.703704
	AUACUGCCGGGUAAUGAUGGA	GAUGGA	1.9	1.2	1.58333
hsa-mir-203
	GUGAAAUGUUUAGGACCACU	ACCACU	2.3	1.7	1.35294
	GUGAAAUGUUUAGGACCACUA	CCACUA	4.3	2.2	1.95455
	GUGAAAUGUUUAGGACCACUAG	CACUAG	51.1	34.3	1.4898
	GUGAAAUGUUUAGGACCACUAGA	ACUAGA	4.9	3.9	1.25641
	UGAAAUGUUUAGGACCACU	ACCACU	2.1	1.5	1.4
	UGAAAUGUUUAGGACCACUA	CCACUA	5.3	4.7	1.12766
	UGAAAUGUUUAGGACCACUAG	CACUAG	58.6	43.1	1.35963
	UGAAAUGUUUAGGACCACUAGA	ACUAGA	9.2	4.7	1.95745
hsa-mir-205
	UCCUUCAUUCCACCGGAGU	CGGAGU	4.9	2.2	2.22727
	UCCUUCAUUCCACCGGAGUC	GGAGUC	6	3.7	1.62162
	UCCUUCAUUCCACCGGAGUCU	GAGUCU	39.3	21.6	1.81944
	UCCUUCAUUCCACCGGAGUCUG	AGUCUG	156.5	138	1.13406
	UCCUUCAUUCCACCGGAGUCUGU	GUCUGU	285.4	255.4	1.11746
	GAUUUCAGUGGAGUGAAGUU	GAAGUU	0.2	2.5	0.08
	GAUUUCAGUGGAGUGAAGUUC	AAGUUC	0	5.6	0
	GAUUUCAGUGGAGUGAAGUUCA	AGUUCA	1.1	30.6	0.0359477
hsa-mir-20a
	UAAAGUGCUUAUAGUGCAG	GUGCAG	2.1	1	2.1
	UAAAGUGCUUAUAGUGCAGG	UGCAGG	2.6	0.5	5.2
	UAAAGUGCUUAUAGUGCAGGU	GCAGGU	17.7	9.6	1.84375
	UAAAGUGCUUAUAGUGCAGGUA	CAGGUA	60.9	49.3	1.23529
	UAAAGUGCUUAUAGUGCAGGUAG	AGGUAG	98.6	190	0.518947
	UAAAGUGCUUAUAGUGCAGGUAGU	GGUAGU	12.8	21.3	0.600939
hsa-mir-21
	GUAGCUUAUCAGACUGAUGUU	GAUGUU	3.2	3.2	1
	GUAGCUUAUCAGACUGAUGUUG	AUGUUG	6.2	14.5	0.427586
	GUAGCUUAUCAGACUGAUGUUGA	UGUUGA	52.4	79.9	0.65582
	GUAGCUUAUCAGACUGAUGUUGAC	GUUGAC	16	34.3	0.466472
	GUAGCUUAUCAGACUGAUGUUGACU	UUGACU	3.4	3.4	1
	UAGCUUAUCAGACUGA	GACUGA	3.8	7.4	0.513514
	UAGCUUAUCAGACUGAU	ACUGAU	12	29.4	0.408163
	UAGCUUAUCAGACUGAUG	CUGAUG	75.9	137	0.554015
	UAGCUUAUCAGACUGAUGU	UGAUGU	77	112	0.6875
	UAGCUUAUCAGACUGAUGUU	GAUGUU	387.6	730.2	0.530813
	UAGCUUAUCAGACUGAUGUUG	AUGUUG	1472.8	2097.8	0.702069
	UAGCUUAUCAGACUGAUGUUGA	UGUUGA	6522.5	11789.3	0.553256
	UAGCUUAUCAGACUGAUGUUGAC	GUUGAC	14296.9	24922.1	0.573664
	UAGCUUAUCAGACUGAUGUUGACU	UUGACU	696.9	571.1	1.22028
	UAGCUUAUCAGACUGAUGUUGACUG	UGACUG	8.8	9.1	0.967033
	UAGCUUAUCAGACUGAUGUUGACUGU	GACUGU	10.3	9.8	1.05102
	UAGCUUAUCAGACUGAUGUUGACUGUU	ACUGUU	4.5	7.8	0.576923
	UAGCUUAUCAGACUGAUGUUGACUGUUG	CUGUUG	0.9	2.9	0.310345
	AGCUUAUCAGACUGAUGUU	GAUGUU	1.9	3.2	0.59375
	AGCUUAUCAGACUGAUGUUG	AUGUUG	7.3	8.6	0.848837
	AGCUUAUCAGACUGAUGUUGA	UGUUGA	27.8	39.5	0.703797
	AGCUUAUCAGACUGAUGUUGAC	GUUGAC	207.8	287.3	0.723286
	AGCUUAUCAGACUGAUGUUGACU	UUGACU	50	61.5	0.813008
	GCUUAUCAGACUGAUGUUGA	UGUUGA	4.1	4.7	0.87234
	GCUUAUCAGACUGAUGUUGAC	GUUGAC	7.1	9.8	0.72449
	UUAUCAGACUGAUGUUGA	UGUUGA	7.1	11.3	0.628319
	UUAUCAGACUGAUGUUGAC	GUUGAC	10.7	16.7	0.640719
	UUAUCAGACUGAUGUUGACU	UUGACU	7.3	10.3	0.708738
	UAUCAGACUGAUGUUGA	UGUUGA	5.1	11.3	0.451327
	UAUCAGACUGAUGUUGAC	GUUGAC	9.6	17.2	0.55814
	UAUCAGACUGAUGUUGACU	UUGACU	8.5	13.2	0.643939
	AUCAGACUGAUGUUGACU	UUGACU	3.4	6.6	0.515152
	UCAGACUGAUGUUGACU	UUGACU	1.3	2.5	0.52
	CAACACCAGUCGAUGGGCUG	GGGCUG	2.3	2.5	0.92
	CAACACCAGUCGAUGGGCUGU	GGCUGU	19.2	11.5	1.66957
	CAACACCAGUCGAUGGGCUGUC	GCUGUC	11.7	52.7	0.222011
	CAACACCAGUCGAUGGGCUGUCU	CUGUCU	1.9	1	1.9
hsa-mir-210
	ACUGUGCGUGUGACAGCGGCUGA	GGCUGA	2.3	2.7	0.851852
	CUGUGCGUGUGACAGCGGCU	GCGGCU	4.1	4.7	0.87234
	CUGUGCGUGUGACAGCGGCUG	CGGCUG	2.4	2.9	0.827586
	CUGUGCGUGUGACAGCGGCUGA	GGCUGA	196.5	132.6	1.4819
	CUGUGCGUGUGACAGCGGCUGAU	GCUGAU	17.3	12.3	1.4065
hsa-mir-212
	ACCUUGGCUCUAGACUGCUUACUG	UUACUG	4.1	1	4.1
	UAACAGUCUCCAGUCACGGCCA	CGGCCA	3.8	2.2	1.72727
hsa-mir-215
	AUGACCUAUGAAUUGACAGAC	ACAGAC	3.2	2	1.6
	AUGACCUAUGAAUUGACAGACA	CAGACA	12.6	9.1	1.38462
	UGACCUAUGAAUUGACAG	UGACAG	1.9	1.7	1.11765
hsa-mir-22
	AGUUCUUCAGUGGCAAGCUUU	AGCUUU	17.1	16.7	1.02395
	AGUUCUUCAGUGGCAAGCUUUA	GCUUUA	16	17.2	0.930233
	AAGCUGCCAGUUGAAGAA	GAAGAA	7.7	9.6	0.802083
	AAGCUGCCAGUUGAAGAAC	AAGAAC	5.3	7.1	0.746479
	AAGCUGCCAGUUGAAGAACU	AGAACU	51.3	57.1	0.898424
	AAGCUGCCAGUUGAAGAACUG	GAACUG	5.1	7.6	0.671053
	AAGCUGCCAGUUGAAGAACUGU	AACUGU	185.3	198.1	0.935386
	AAGCUGCCAGUUGAAGAACUGUU	ACUGUU	16	10.1	1.58416
hsa-mir-221
	AACCUGGCAUACAAUGUAGAUUU	AGAUUU	8.1	4.9	1.65306
	AACCUGGCAUACAAUGUAGAUUUC	GAUUUC	2.6	0.2	13
	AACCUGGCAUACAAUGUAGAUUUCU	AUUUCU	1.9	0.5	3.8
	ACCUGGCAUACAAUGUAGAUU	UAGAUU	5.6	5.9	0.949153
	ACCUGGCAUACAAUGUAGAUUU	AGAUUU	53.2	26.5	2.00755
	ACCUGGCAUACAAUGUAGAUUUC	GAUUUC	23.9	9.3	2.56989
	ACCUGGCAUACAAUGUAGAUUUCU	AUUUCU	22.9	5.1	4.4902
	AGCUACAUUGUCUGCU	UCUGCU	4.5	2.5	1.8
	AGCUACAUUGUCUGCUG	CUGCUG	7	13	0.538462
	AGCUACAUUGUCUGCUGG	UGCUGG	64.1	32.8	1.95427
	AGCUACAUUGUCUGCUGGG	GCUGGG	162.9	114.7	1.42023
	AGCUACAUUGUCUGCUGGGU	CUGGGU	115.9	103.4	1.12089
	AGCUACAUUGUCUGCUGGGUU	UGGGUU	588.5	656.4	0.896557
	AGCUACAUUGUCUGCUGGGUUU	GGGUUU	3737.8	4245.1	0.880498
	AGCUACAUUGUCUGCUGGGUUUC	GGUUUC	2206	2627.3	0.839645
	AGCUACAUUGUCUGCUGGGUUUCA	GUUUCA	224.7	256.4	0.876365
	GCUACAUUGUCUGCUGGGUUU	GGGUUU	1.9	4.2	0.452381
	CUACAUUGUCUGCUGGGUUU	GGGUUU	2.3	2.7	0.851852
hsa-mir-222
	AGCUACAUCUGGCUACU	GCUACU	27.6	29.7	0.929293
	AGCUACAUCUGGCUACUG	CUACUG	35.7	32.4	1.10185
	AGCUACAUCUGGCUACUGG	UACUGG	19.2	13.7	1.40146
	AGCUACAUCUGGCUACUGGG	ACUGGG	49.8	47.1	1.05732
	AGCUACAUCUGGCUACUGGGU	CUGGGU	246.9	190	1.29947
	AGCUACAUCUGGCUACUGGGUC	UGGGUC	261.9	197.3	1.32742
	AGCUACAUCUGGCUACUGGGUCU	GGGUCU	2100.8	1789.2	1.17416
	AGCUACAUCUGGCUACUGGGUCUC	GGUCUC	714.2	783.7	0.911318
	AGCUACAUCUGGCUACUGGGUCUCU	GUCUCU	191.3	113.2	1.68993
hsa-mir-224
	CAAGUCACUAGUGGUUCCG	GUUCCG	1.9	0.2	9.5
	CAAGUCACUAGUGGUUCCGUU	UCCGUU	7.3	8.1	0.901235
	CAAGUCACUAGUGGUUCCGUUU	CCGUUU	84.4	51.5	1.63883
	CAAGUCACUAGUGGUUCCGUUUA	CGUUUA	97.9	52.5	1.86476
	CAAGUCACUAGUGGUUCCGUUUAG	GUUUAG	101.7	63.7	1.59655
	CAAGUCACUAGUGGUUCCGUUUAGU	UUUAGU	6.6	2.2	3
hsa-mir-23a
	GGGGUUCCUGGGGAUGGGAUU	GGGAUU	0.6	5.4	0.111111
	GGGGUUCCUGGGGAUGGGAUUU	GGAUUU	1.9	23	0.0826087
	GGGGUUCCUGGGGAUGGGAUUUG	GAUUUG	0	3.9	0
	AAUCACAUUGCCAGGGAUUU	GGAUUU	1.9	3.2	0.59375
	AAUCACAUUGCCAGGGAUUUC	GAUUUC	1.9	2.7	0.703704
	AAUCACAUUGCCAGGGAUUUCC	AUUUCC	1.7	4.2	0.404762
	AAUCACAUUGCCAGGGAUUUCCA	UUUCCA	3.4	2.5	1.36
	AUCACAUUGCCAGGGAU	AGGGAU	6.6	8.3	0.795181
	AUCACAUUGCCAGGGAUU	GGGAUU	29.5	30.4	0.970395
	AUCACAUUGCCAGGGAUUU	GGAUUU	228.1	320.1	0.71259
	AUCACAUUGCCAGGGAUUUC	GAUUUC	264.8	381.9	0.693375
	AUCACAUUGCCAGGGAUUUCC	AUUUCC	155.6	188.5	0.825464
	AUCACAUUGCCAGGGAUUUCCA	UUUCCA	1266.1	793.7	1.59519
	AUCACAUUGCCAGGGAUUUCCAA	UUCCAA	501.3	268.2	1.86913
	UCACAUUGCCAGGGAUUUCCA	UUUCCA	2.4	2	1.2
	UCACAUUGCCAGGGAUUUCCAA	UUCCAA	5.1	2.5	2.04
	ACAUUGCCAGGGAUUUC	GAUUUC	1.7	2.9	0.586207
	ACAUUGCCAGGGAUUUCCA	UUUCCA	7	5.1	1.37255
	ACAUUGCCAGGGAUUUCCAA	UUCCAA	2.3	1.7	1.35294
hsa-mir-23b
	UUGGGUUCCUGGCAUGCUGAUU	CUGAUU	4.1	1.2	3.41667
	UUGGGUUCCUGGCAUGCUGAUUU	UGAUUU	3.9	1.7	2.29412
	UGGGUUCCUGGCAUGCUGAU	GCUGAU	3	1.7	1.76471
	UGGGUUCCUGGCAUGCUGAUU	CUGAUU	11.3	6.6	1.71212
	UGGGUUCCUGGCAUGCUGAUUU	UGAUUU	56.7	30.4	1.86513
	GGGUUCCUGGCAUGCUGAUU	CUGAUU	1.7	29.9	0.0568562
	GGGUUCCUGGCAUGCUGAUUU	UGAUUU	13.2	92.9	0.142088
	GGGUUCCUGGCAUGCUGAUUUG	GAUUUG	0.6	3.2	0.1875
	AUCACAUUGCCAGGGAU	AGGGAU	6.6	8.3	0.795181
	AUCACAUUGCCAGGGAUU	GGGAUU	29.5	30.4	0.970395
	AUCACAUUGCCAGGGAUUA	GGAUUA	27.6	44.1	0.62585
	AUCACAUUGCCAGGGAUUAC	GAUUAC	19.5	25.7	0.758755
	AUCACAUUGCCAGGGAUUACC	AUUACC	19.7	22.8	0.864035
	AUCACAUUGCCAGGGAUUACCA	UUACCA	186	99.3	1.87311
	AUCACAUUGCCAGGGAUUACCAC	UACCAC	218.9	119.1	1.83795
	UCACAUUGCCAGGGAUUACCA	UUACCA	2.4	2.7	0.888889
	UCACAUUGCCAGGGAUUACCAC	UACCAC	8.1	6.1	1.32787
hsa-mir-24-1
	CUGGCUCAGUUCAGCAGGAACA	GGAACA	3.9	4.2	0.928571
	CUGGCUCAGUUCAGCAGGAACAG	GAACAG	8.5	9.6	0.885417
	UGGCUCAGUUCAGCAGG	AGCAGG	6.8	11	0.618182
	UGGCUCAGUUCAGCAGGA	GCAGGA	15.4	31.6	0.487342
	UGGCUCAGUUCAGCAGGAA	CAGGAA	22.7	21.8	1.04128
	UGGCUCAGUUCAGCAGGAAC	AGGAAC	42.7	70.4	0.606534
	UGGCUCAGUUCAGCAGGAACA	GGAACA	420	929.5	0.451856
	UGGCUCAGUUCAGCAGGAACAG	GAACAG	5871.6	10040.6	0.584786
	UGGCUCAGUUCAGCAGGAACAGG	AACAGG	5.6	11.5	0.486957
	GGCUCAGUUCAGCAGGAACAG	GAACAG	11.1	9.8	1.13265
	GCUCAGUUCAGCAGGAACAG	GAACAG	3.4	8.1	0.419753
hsa-mir-24-2
	GUGCCUACUGAGCUGAAACACA	AACACA	2.1	3.2	0.65625
	GUGCCUACUGAGCUGAAACACAG	ACACAG	7.1	9.8	0.72449
	GUGCCUACUGAGCUGAAACACAGU	CACAGU	2.4	9.3	0.258065
	CUGGCUCAGUUCAGCAGGAACA	GGAACA	3.9	4.2	0.928571
	CUGGCUCAGUUCAGCAGGAACAG	GAACAG	8.5	9.6	0.885417
	UGGCUCAGUUCAGCAGG	AGCAGG	6.8	11	0.618182
	UGGCUCAGUUCAGCAGGA	GCAGGA	15.4	31.6	0.487342
	UGGCUCAGUUCAGCAGGAA	CAGGAA	22.7	21.8	1.04128
	UGGCUCAGUUCAGCAGGAAC	AGGAAC	42.7	70.4	0.606534
	UGGCUCAGUUCAGCAGGAACA	GGAACA	420	929.5	0.451856
	UGGCUCAGUUCAGCAGGAACAG	GAACAG	5871.6	10040.6	0.584786
	UGGCUCAGUUCAGCAGGAACAGG	AACAGG	5.6	11.5	0.486957
	GGCUCAGUUCAGCAGGAACAG	GAACAG	11.1	9.8	1.13265
	GCUCAGUUCAGCAGGAACAG	GAACAG	3.4	8.1	0.419753
hsa-mir-25
	AGGCGGAGACUUGGGCAAUU	GCAAUU	0.9	8.8	0.102273
	AGGCGGAGACUUGGGCAAUUG	CAAUUG	4.3	45.1	0.0953437
	AGGCGGAGACUUGGGCAAUUGC	AAUUGC	5.8	49.3	0.117647
	AGGCGGAGACUUGGGCAAUUGCU	AUUGCU	25.6	204.9	0.124939
	AGGCGGAGACUUGGGCAAUUGCUGGA	GCUGGA	0	3.9	0
	CAUUGCACUUGUCUCGG	UCUCGG	17.9	16.7	1.07186
	CAUUGCACUUGUCUCGGU	CUCGGU	31	13.7	2.26277
	CAUUGCACUUGUCUCGGUC	UCGGUC	28.9	25.2	1.14683
	CAUUGCACUUGUCUCGGUCU	CGGUCU	56.2	97.3	0.577595
	CAUUGCACUUGUCUCGGUCUG	GGUCUG	822.8	742	1.10889
	CAUUGCACUUGUCUCGGUCUGA	GUCUGA	4154	4322.5	0.961018
	AUUGCACUUGUCUCGGUCUGA	GUCUGA	5.8	8.6	0.674419
hsa-mir-26a-1
	UUCAAGUAAUCCAGGAUA	AGGAUA	3.2	2.5	1.28
	UUCAAGUAAUCCAGGAUAG	GGAUAG	7.1	13.7	0.518248
	UUCAAGUAAUCCAGGAUAGG	GAUAGG	20.3	37	0.548649
	UUCAAGUAAUCCAGGAUAGGC	AUAGGC	44.7	80.9	0.552534
	UUCAAGUAAUCCAGGAUAGGCU	UAGGCU	1414.2	1882.8	0.751115
	UUCAAGUAAUCCAGGAUAGGCUG	AGGCUG	12	8.8	1.36364
	UUCAAGUAAUCCAGGAUAGGCUGU	GGCUGU	15	9.6	1.5625
	UCAAGUAAUCCAGGAUAGGCU	UAGGCU	5.6	9.1	0.615385
	CAAGUAAUCCAGGAUAGGCU	UAGGCU	3	3.7	0.810811
	AAGUAAUCCAGGAUAGGCU	UAGGCU	13.7	16.9	0.810651
hsa-mir-26a-2
	UUCAAGUAAUCCAGGAUA	AGGAUA	3.2	2.5	1.28
	UUCAAGUAAUCCAGGAUAG	GGAUAG	7.1	13.7	0.518248
	UUCAAGUAAUCCAGGAUAGG	GAUAGG	20.3	37	0.548649
	UUCAAGUAAUCCAGGAUAGGC	AUAGGC	44.7	80.9	0.552534
	UUCAAGUAAUCCAGGAUAGGCU	UAGGCU	1414.2	1882.8	0.751115
	UUCAAGUAAUCCAGGAUAGGCUG	AGGCUG	12	8.8	1.36364
	UUCAAGUAAUCCAGGAUAGGCUGU	GGCUGU	15	9.6	1.5625
	UCAAGUAAUCCAGGAUAGGCU	UAGGCU	5.6	9.1	0.615385
	CAAGUAAUCCAGGAUAGGCU	UAGGCU	3	3.7	0.810811
	AAGUAAUCCAGGAUAGGCU	UAGGCU	13.7	16.9	0.810651
hsa-mir-26b
	UUCAAGUAAUUCAGGAUA	AGGAUA	2.6	0.7	3.71429
	UUCAAGUAAUUCAGGAUAG	GGAUAG	4.3	1.2	3.58333
	UUCAAGUAAUUCAGGAUAGG	GAUAGG	23.3	25.2	0.924603
	UUCAAGUAAUUCAGGAUAGGU	AUAGGU	52.8	68.4	0.77193
	UUCAAGUAAUUCAGGAUAGGUU	UAGGUU	953	721.2	1.32141
	UUCAAGUAAUUCAGGAUAGGUUG	AGGUUG	6.8	10.3	0.660194
	UUCAAGUAAUUCAGGAUAGGUUGU	GGUUGU	2.1	0.5	4.2
	UCAAGUAAUUCAGGAUAGGUU	UAGGUU	3	1.7	1.76471
	CAAGUAAUUCAGGAUAGGUU	UAGGUU	4.5	1.2	3.75
	AAGUAAUUCAGGAUAGGUU	UAGGUU	26.5	19.6	1.35204
hsa-mir-27a
	AGGGCUUAGCUGCUUGUGAGCA	UGAGCA	2.1	18.4	0.11413
	UUCACAGUGGCUAAGU	CUAAGU	2.1	4.4	0.477273
	UUCACAGUGGCUAAGUU	UAAGUU	73.3	83.6	0.876794
	UUCACAGUGGCUAAGUUC	AAGUUC	78.9	116.7	0.676093
	UUCACAGUGGCUAAGUUCC	AGUUCC	62.6	46.3	1.35205
	UUCACAGUGGCUAAGUUCCG	GUUCCG	1193.2	1322	0.902572
	UUCACAGUGGCUAAGUUCCGC	UUCCGC	125.9	178.5	0.705322
	ACAGUGGCUAAGUUCCG	GUUCCG	8.8	6.1	1.44262
hsa-mir-27b
	CAGAGCUUAGCUGAUUGGUGAAC	GUGAAC	0.2	2.7	0.0740741
	CAGAGCUUAGCUGAUUGGUGAACA	UGAACA	1.1	18.1	0.0607735
	AGAGCUUAGCUGAUUGGUGA	UGGUGA	0.4	5.9	0.0677966
	AGAGCUUAGCUGAUUGGUGAA	GGUGAA	1.1	6.4	0.171875
	AGAGCUUAGCUGAUUGGUGAAC	GUGAAC	1.1	18.1	0.0607735
	AGAGCUUAGCUGAUUGGUGAACA	UGAACA	9.8	120.8	0.0811258
	AGAGCUUAGCUGAUUGGUGAACAG	GAACAG	3.4	3.4	1
	AGAGCUUAGCUGAUUGGUGAACAGU	AACAGU	2.8	3.9	0.717949
	UUCACAGUGGCUAAGU	CUAAGU	2.1	4.4	0.477273
	UUCACAGUGGCUAAGUU	UAAGUU	73.3	83.6	0.876794
	UUCACAGUGGCUAAGUUC	AAGUUC	78.9	116.7	0.676093
	UUCACAGUGGCUAAGUUCU	AGUUCU	101.7	167.9	0.605718
	UUCACAGUGGCUAAGUUCUG	GUUCUG	56.4	61.5	0.917073
	UUCACAGUGGCUAAGUUCUGC	UUCUGC	127.2	153.9	0.826511
	UUCACAGUGGCUAAGUUCUGCA	UCUGCA	72.5	67.7	1.0709
	ACAGUGGCUAAGUUCU	AGUUCU	1.3	2.5	0.52
hsa-mir-28
	AAGGAGCUCACAGUCUAUUG	CUAUUG	3.4	1	3.4
	AAGGAGCUCACAGUCUAUUGA	UAUUGA	5.4	4.4	1.22727
	AAGGAGCUCACAGUCUAUUGAG	AUUGAG	8.3	12.5	0.664
	CACUAGAUUGUGAGCUCCUGGA	CCUGGA	37.2	23.8	1.56303
	CACUAGAUUGUGAGCUCCUGGAG	CUGGAG	2.3	1.7	1.35294
	ACUAGAUUGUGAGCUCCUGGAG	CUGGAG	3.2	2.7	1.18519
hsa-mir-29a
	ACUGAUUUCUUUUGGUGUUCAGA	UUCAGA	1.9	2.7	0.703704
	CUAGCACCAUCUGAAAUCGGU	AUCGGU	2.8	5.4	0.518519
	CUAGCACCAUCUGAAAUCGGUU	UCGGUU	70.7	86	0.822093
	CUAGCACCAUCUGAAAUCGGUUA	CGGUUA	117.8	102.5	1.14927
	CUAGCACCAUCUGAAAUCGGUUAU	GGUUAU	3.6	5.1	0.705882
	UAGCACCAUCUGAAAUC	GAAAUC	3.8	3.9	0.974359
	UAGCACCAUCUGAAAUCG	AAAUCG	28.9	21.6	1.33796
	UAGCACCAUCUGAAAUCGG	AAUCGG	246.5	107.1	2.30159
	UAGCACCAUCUGAAAUCGGU	AUCGGU	46.4	51	0.909804
	UAGCACCAUCUGAAAUCGGUU	UCGGUU	1072.2	672.4	1.59459
	UAGCACCAUCUGAAAUCGGUUA	CGGUUA	19074.5	12192.3	1.56447
	UAGCACCAUCUGAAAUCGGUUAU	GGUUAU	107.3	64	1.67656
	AGCACCAUCUGAAAUCGGUUA	CGGUUA	8.3	5.6	1.48214
	GCACCAUCUGAAAUCGGUUA	CGGUUA	1.9	0.2	9.5
	ACCAUCUGAAAUCGGUUA	CGGUUA	2.6	2.5	1.04
hsa-mir-29b-1
	UAGCACCAUUUGAAAUCAG	AAUCAG	4.3	1.5	2.86667
	UAGCACCAUUUGAAAUCAGU	AUCAGU	19.2	4.4	4.36364
	UAGCACCAUUUGAAAUCAGUG	UCAGUG	10.5	2.5	4.2
	UAGCACCAUUUGAAAUCAGUGU	CAGUGU	41.2	9.8	4.20408
	UAGCACCAUUUGAAAUCAGUGUU	AGUGUU	355.3	78.2	4.54348
hsa-mir-29b-2
	UAGCACCAUUUGAAAUCAG	AAUCAG	4.3	1.5	2.86667
	UAGCACCAUUUGAAAUCAGU	AUCAGU	19.2	4.4	4.36364
	UAGCACCAUUUGAAAUCAGUG	UCAGUG	10.5	2.5	4.2
	UAGCACCAUUUGAAAUCAGUGU	CAGUGU	41.2	9.8	4.20408
	UAGCACCAUUUGAAAUCAGUGUU	AGUGUU	355.3	78.2	4.54348
	UAGCACCAUUUGAAAUCAGUGUUU	GUGUUU	37	7.4	5
hsa-mir-29c
	UAGCACCAUUUGAAAUCGG	AAUCGG	1.9	1.2	1.58333
	UAGCACCAUUUGAAAUCGGUU	UCGGUU	7.9	3.9	2.02564
	UAGCACCAUUUGAAAUCGGUUA	CGGUUA	222.7	78.4	2.84056
hsa-mir-301a
	GCUCUGACUUUAUUGCACUAC	CACUAC	3.8	6.1	0.622951
	GCUCUGACUUUAUUGCACUACU	ACUACU	6.8	11.5	0.591304
	CAGUGCAAUAGUAUUGUCAAAGCAU	AAGCAU	5.3	2.5	2.12
hsa-mir-301b
	CAGUGCAAUGAUAUUGUCAAAGCAU	AAGCAU	2.4	0.7	3.42857
hsa-mir-30a
	UGUAAACAUCCUCGAC	CUCGAC	7.5	6.6	1.13636
	UGUAAACAUCCUCGACUGG	GACUGG	7.9	15.2	0.519737
	UGUAAACAUCCUCGACUGGA	ACUGGA	10.3	24.3	0.423868
	UGUAAACAUCCUCGACUGGAA	CUGGAA	29.7	41.4	0.717391
	UGUAAACAUCCUCGACUGGAAG	UGGAAG	375.1	373.1	1.00536
	UGUAAACAUCCUCGACUGGAAGC	GGAAGC	1373.8	1135.9	1.20944
	UGUAAACAUCCUCGACUGGAAGCU	GAAGCU	1364.2	586.6	2.32561
	UGUAAACAUCCUCGACUGGAAGCUG	AAGCUG	2.6	2	1.3
	UGUAAACAUCCUCGACUGGAAGCUGU	AGCUGU	2.6	1	2.6
	GUAAACAUCCUCGACUGGAAGC	GGAAGC	3.4	3.9	0.871795
	GUAAACAUCCUCGACUGGAAGCU	GAAGCU	9.2	4.2	2.19048
	CUUUCAGUCGGAUGUUUG	UGUUUG	2.8	2.5	1.12
	CUUUCAGUCGGAUGUUUGC	GUUUGC	2.3	4.9	0.469388
	CUUUCAGUCGGAUGUUUGCA	UUUGCA	8.8	8.1	1.08642
	CUUUCAGUCGGAUGUUUGCAG	UUGCAG	132.8	105.6	1.25758
	CUUUCAGUCGGAUGUUUGCAGC	UGCAGC	188.3	197.3	0.954384
	CUUUCAGUCGGAUGUUUGCAGCU	GCAGCU	2.3	2.2	1.04545
	UUUCAGUCGGAUGUUUGCA	UUUGCA	8.3	4.2	1.97619
	UUUCAGUCGGAUGUUUGCAG	UUGCAG	121.9	66.7	1.82759
	UUUCAGUCGGAUGUUUGCAGC	UGCAGC	127.8	88.5	1.44407
	UUUCAGUCGGAUGUUUGCAGCU	GCAGCU	5.3	1.7	3.11765
	UUCAGUCGGAUGUUUGCAG	UUGCAG	2.6	2.5	1.04
	UUCAGUCGGAUGUUUGCAGC	UGCAGC	3.6	2.9	1.24138
	UCAGUCGGAUGUUUGCAGC	UGCAGC	2.6	2.2	1.18182
hsa-mir-30b
	UGUAAACAUCCUACACU	UACACU	1.5	2.7	0.555556
	UGUAAACAUCCUACACUCAGCU	UCAGCU	10.3	12.3	0.837398
	CUGGGAGGUGGAUGUUUACU	UUUACU	2.8	2	1.4
	CUGGGAGGUGGAUGUUUACUU	UUACUU	3.6	9.6	0.375
	CUGGGAGGUGGAUGUUUACUUC	UACUUC	0.9	3.2	0.28125
hsa-mir-30c-1
	UGUAAACAUCCUACACU	UACACU	1.5	2.7	0.555556
	UGUAAACAUCCUACACUCUCA	CUCUCA	1.5	4.9	0.306122
	UGUAAACAUCCUACACUCUCAGC	CUCAGC	10.7	14	0.764286
	UGUAAACAUCCUACACUCUCAGCU	UCAGCU	66.7	58.3	1.14408
hsa-mir-30c-2
	UGUAAACAUCCUACACU	UACACU	1.5	2.7	0.555556
	UGUAAACAUCCUACACUCUCA	CUCUCA	1.5	4.9	0.306122
	UGUAAACAUCCUACACUCUCAGC	CUCAGC	10.7	14	0.764286
	UGUAAACAUCCUACACUCUCAGCU	UCAGCU	66.7	58.3	1.14408
	CUGGGAGAAGGCUGUUUA	UGUUUA	1.9	1.7	1.11765
	CUGGGAGAAGGCUGUUUACU	UUUACU	12	7.4	1.62162
	CUGGGAGAAGGCUGUUUACUC	UUACUC	2.8	5.6	0.5
	CUGGGAGAAGGCUGUUUACUCU	UACUCU	8.6	10.5	0.819048
hsa-mir-30d
	UGUAAACAUCCCCGACUGGA	ACUGGA	4.9	14	0.35
	UGUAAACAUCCCCGACUGGAA	CUGGAA	9.6	28.2	0.340426
	UGUAAACAUCCCCGACUGGAAG	UGGAAG	76.9	133.1	0.577761
	UGUAAACAUCCCCGACUGGAAGC	GGAAGC	230.7	399.3	0.577761
	UGUAAACAUCCCCGACUGGAAGCU	GAAGCU	844.3	937.6	0.900491
	UGUAAACAUCCCCGACUGGAAGCUG	AAGCUG	1.7	2.5	0.68
hsa-mir-30e
	UGUAAACAUCCUUGACU	UUGACU	2.3	2.9	0.793103
	UGUAAACAUCCUUGACUG	UGACUG	2.3	1.2	1.91667
	UGUAAACAUCCUUGACUGGAAG	UGGAAG	10.1	11.8	0.855932
	UGUAAACAUCCUUGACUGGAAGC	GGAAGC	25.7	34.6	0.742775
	UGUAAACAUCCUUGACUGGAAGCU	GAAGCU	228.5	245.6	0.930375
	UGUAAACAUCCUUGACUGGAAGCUG	AAGCUG	2.4	4.2	0.571429
	GUAAACAUCCUUGACUGGAAGCU	GAAGCU	3.4	4.4	0.772727
	CUUUCAGUCGGAUGUUUACA	UUUACA	3.8	2.9	1.31034
	CUUUCAGUCGGAUGUUUACAG	UUACAG	40	36.5	1.09589
	CUUUCAGUCGGAUGUUUACAGC	UACAGC	42.5	45.6	0.932018
	UUUCAGUCGGAUGUUUACAG	UUACAG	1.9	1.2	1.58333
	UUUCAGUCGGAUGUUUACAGC	UACAGC	4.5	2.7	1.66667
	UCAGUCGGAUGUUUACAG	UUACAG	2.1	0.2	10.5
hsa-mir-31
	GAGGCAAGAUGCUGGCAUAGCU	AUAGCU	2.3	1.2	1.91667
	AGGCAAGAUGCUGGCA	CUGGCA	2.8	0.2	14
	AGGCAAGAUGCUGGCAU	UGGCAU	5.1	2.7	1.88889
	AGGCAAGAUGCUGGCAUA	GGCAUA	12	6.4	1.875
	AGGCAAGAUGCUGGCAUAG	GCAUAG	67.3	37.7	1.78515
	AGGCAAGAUGCUGGCAUAGC	CAUAGC	25	20.3	1.23153
	AGGCAAGAUGCUGGCAUAGCU	AUAGCU	471.6	268.2	1.75839
	AGGCAAGAUGCUGGCAUAGCUG	UAGCUG	752.2	482.9	1.55767
	AGGCAAGAUGCUGGCAUAGCUGU	AGCUGU	839	495.2	1.69426
	AGGCAAGAUGCUGGCAUAGCUGUU	GCUGUU	41.7	29.4	1.41837
	GCAAGAUGCUGGCAUAGCUGU	AGCUGU	1.5	2.5	0.6
	UGCUAUGCCAACAUAUUGCCAU	UGCCAU	3.2	1.2	2.66667
	UGCUAUGCCAACAUAUUGCCAUC	GCCAUC	6.8	2.9	2.34483
hsa-mir-32
	UAUUGCACAUUACUAAGUUGCA	GUUGCA	3.4	1.7	2
	UAUUGCACAUUACUAAGUUGCAU	UUGCAU	15.6	2.5	6.24
	UGUUGUCACGGCCUCAAUG	UCAAUG	0.2	3.4	0.0588235
hsa-mir-320a
	GAAAAGCUGGGUUGAGAGGGCG	AGGGCG	8.8	20.1	0.437811
	GAAAAGCUGGGUUGAGAGGGCGA	GGGCGA	27.8	63	0.44127
	GAAAAGCUGGGUUGAGAGGGCGAA	GGCGAA	1.7	2.7	0.62963
	AAAAGCUGGGUUGAGAG	UGAGAG	10	22.8	0.438596
	AAAAGCUGGGUUGAGAGG	GAGAGG	17.9	23.5	0.761702
	AAAAGCUGGGUUGAGAGGG	AGAGGG	57.7	69.4	0.831412
	AAAAGCUGGGUUGAGAGGGC	GAGGGC	39.8	61	0.652459
	AAAAGCUGGGUUGAGAGGGCG	AGGGCG	541.4	918.2	0.589632
	AAAAGCUGGGUUGAGAGGGCGA	GGGCGA	2144.2	3759	0.570418
	AAAAGCUGGGUUGAGAGGGCGAA	GGCGAA	896.1	1325.9	0.675843
	AAAAGCUGGGUUGAGAGGGCGAAA	GCGAAA	187	174.8	1.06979
	AAAAGCUGGGUUGAGAGGGCGAAAA	CGAAAA	20.3	18.6	1.0914
	AAAAGCUGGGUUGAGAGGGCGAAAAA	GAAAAA	3.9	3.2	1.21875
	AAAGCUGGGUUGAGAGG	GAGAGG	3.2	2	1.6
	AAAGCUGGGUUGAGAGGG	AGAGGG	6	8.3	0.722892
	AAAGCUGGGUUGAGAGGGC	GAGGGC	3.2	5.9	0.542373
	AAAGCUGGGUUGAGAGGGCG	AGGGCG	73.8	92.2	0.800434
	AAAGCUGGGUUGAGAGGGCGA	GGGCGA	213.5	266.2	0.802029
	AAAGCUGGGUUGAGAGGGCGAA	GGCGAA	133.4	148.5	0.898316
	AAAGCUGGGUUGAGAGGGCGAAA	GCGAAA	37.8	24.8	1.52419
	AAAGCUGGGUUGAGAGGGCGAAAA	CGAAAA	3.9	2	1.95
	AAGCUGGGUUGAGAGGGCG	AGGGCG	8.1	9.6	0.84375
	AAGCUGGGUUGAGAGGGCGA	GGGCGA	36.3	31.9	1.13793
	AAGCUGGGUUGAGAGGGCGAA	GGCGAA	44	42.4	1.03774
	AAGCUGGGUUGAGAGGGCGAAA	GCGAAA	23.7	18.9	1.25397
hsa-mir-320b-1
	AAAAGCUGGGUUGAGAG	UGAGAG	10	22.8	0.438596
	AAAAGCUGGGUUGAGAGG	GAGAGG	17.9	23.5	0.761702
	AAAAGCUGGGUUGAGAGGG	AGAGGG	57.7	69.4	0.831412
	AAAAGCUGGGUUGAGAGGGC	GAGGGC	39.8	61	0.652459
	AAAAGCUGGGUUGAGAGGGCA	AGGGCA	21.8	41.4	0.52657
	AAAAGCUGGGUUGAGAGGGCAA	GGGCAA	27.6	48.5	0.569072
	AAAAGCUGGGUUGAGAGGGCAAA	GGCAAA	6.8	7.8	0.871795
	AAAGCUGGGUUGAGAGG	GAGAGG	3.2	2	1.6
	AAAGCUGGGUUGAGAGGG	AGAGGG	6	8.3	0.722892
	AAAGCUGGGUUGAGAGGGC	GAGGGC	3.2	5.9	0.542373
	AAAGCUGGGUUGAGAGGGCA	AGGGCA	3.4	2.9	1.17241
	AAAGCUGGGUUGAGAGGGCAA	GGGCAA	3.2	6.4	0.5
hsa-mir-320b-2
	AAAAGCUGGGUUGAGAG	UGAGAG	10	22.8	0.438596
	AAAAGCUGGGUUGAGAGG	GAGAGG	17.9	23.5	0.761702
	AAAAGCUGGGUUGAGAGGG	AGAGGG	57.7	69.4	0.831412
	AAAAGCUGGGUUGAGAGGGC	GAGGGC	39.8	61	0.652459
	AAAAGCUGGGUUGAGAGGGCA	AGGGCA	21.8	41.4	0.52657
	AAAAGCUGGGUUGAGAGGGCAA	GGGCAA	27.6	48.5	0.569072
	AAAAGCUGGGUUGAGAGGGCAAA	GGCAAA	6.8	7.8	0.871795
	AAAGCUGGGUUGAGAGG	GAGAGG	3.2	2	1.6
	AAAGCUGGGUUGAGAGGG	AGAGGG	6	8.3	0.722892
	AAAGCUGGGUUGAGAGGGC	GAGGGC	3.2	5.9	0.542373
	AAAGCUGGGUUGAGAGGGCA	AGGGCA	3.4	2.9	1.17241
	AAAGCUGGGUUGAGAGGGCAA	GGGCAA	3.2	6.4	0.5
hsa-mir-320c-1
	AAAAGCUGGGUUGAGAG	UGAGAG	10	22.8	0.438596
	AAAAGCUGGGUUGAGAGG	GAGAGG	17.9	23.5	0.761702
	AAAAGCUGGGUUGAGAGGG	AGAGGG	57.7	69.4	0.831412
	AAAAGCUGGGUUGAGAGGGU	GAGGGU	13.5	27.5	0.490909
	AAAAGCUGGGUUGAGAGGGUA	AGGGUA	1.3	3.7	0.351351
	AAAGCUGGGUUGAGAGG	GAGAGG	3.2	2	1.6
	AAAGCUGGGUUGAGAGGG	AGAGGG	6	8.3	0.722892
	AAAGCUGGGUUGAGAGGGU	GAGGGU	1.1	4.2	0.261905
hsa-mir-320c-2
	AAAAGCUGGGUUGAGAG	UGAGAG	10	22.8	0.438596
	AAAAGCUGGGUUGAGAGG	GAGAGG	17.9	23.5	0.761702
	AAAAGCUGGGUUGAGAGGG	AGAGGG	57.7	69.4	0.831412
	AAAAGCUGGGUUGAGAGGGU	GAGGGU	13.5	27.5	0.490909
	AAAGCUGGGUUGAGAGG	GAGAGG	3.2	2	1.6
	AAAGCUGGGUUGAGAGGG	AGAGGG	6	8.3	0.722892
	AAAGCUGGGUUGAGAGGGU	GAGGGU	1.1	4.2	0.261905
hsa-mir-320d-1
	AAAAGCUGGGUUGAGAG	UGAGAG	10	22.8	0.438596
	AAAAGCUGGGUUGAGAGG	GAGAGG	17.9	23.5	0.761702
	AAAAGCUGGGUUGAGAGGA	AGAGGA	3.4	3.9	0.871795
	AAAGCUGGGUUGAGAGG	GAGAGG	3.2	2	1.6
hsa-mir-320d-2
	AAAAGCUGGGUUGAGAG	UGAGAG	10	22.8	0.438596
	AAAAGCUGGGUUGAGAGG	GAGAGG	17.9	23.5	0.761702
	AAAAGCUGGGUUGAGAGGA	AGAGGA	3.4	3.9	0.871795
	AAAGCUGGGUUGAGAGG	GAGAGG	3.2	2	1.6
hsa-mir-324
	CGCAUCCCCUAGGGCAUUGGUGU	UGGUGU	2.3	0.5	4.6
	ACUGCCCCAGGUGCUGCUGG	UGCUGG	2.1	2.9	0.724138
hsa-mir-330
	GCAAAGCACACGGCCUGC	GCCUGC	3.6	3.7	0.972973
	GCAAAGCACACGGCCUGCAG	CUGCAG	3	1.7	1.76471
	GCAAAGCACACGGCCUGCAGA	UGCAGA	28.9	30.2	0.956954
	GCAAAGCACACGGCCUGCAGAG	GCAGAG	64.6	59.3	1.08938
	GCAAAGCACACGGCCUGCAGAGA	CAGAGA	448.5	349.1	1.28473
	GCAAAGCACACGGCCUGCAGAGAG	AGAGAG	218	154.2	1.41375
	GCAAAGCACACGGCCUGCAGAGAGG	GAGAGG	75.9	55.9	1.35778
	CAAAGCACACGGCCUGCAG	CUGCAG	1.9	1	1.9
	CAAAGCACACGGCCUGCAGA	UGCAGA	2.6	1.5	1.73333
	CAAAGCACACGGCCUGCAGAG	GCAGAG	13.2	7.6	1.73684
	CAAAGCACACGGCCUGCAGAGA	CAGAGA	75	62.3	1.20385
	CAAAGCACACGGCCUGCAGAGAG	AGAGAG	143.7	89.5	1.60559
	CAAAGCACACGGCCUGCAGAGAGG	GAGAGG	153.3	101.2	1.51482
	AAAGCACACGGCCUGCAGAGA	CAGAGA	12.2	11.3	1.07965
	AAAGCACACGGCCUGCAGAGAG	AGAGAG	21	18.4	1.1413
	AAAGCACACGGCCUGCAGAGAGG	GAGAGG	55.1	44.1	1.24943
hsa-mir-331
	GGUUUUGUUUGGGUUUGUU	UUUGUU	4.1	0	∞
	GUUUUGUUUGGGUUUGUU	UUUGUU	2.3	0	∞
	GCCCCUGGGCCUAUCCUAGA	CCUAGA	6.8	2	3.4
	GCCCCUGGGCCUAUCCUAGAA	CUAGAA	21.2	9.1	2.32967
hsa-mir-335
	UCAAGAGCAAUAACGAAAAAUG	AAAAUG	11.1	20.3	0.546798
	UCAAGAGCAAUAACGAAAAAUGU	AAAUGU	5.6	7.4	0.756757
	UUUUUCAUUAUUGCUCCUGAC	CCUGAC	1.7	3.4	0.5
	UUUUUCAUUAUUGCUCCUGACC	CUGACC	3.2	2.2	1.45455
hsa-mir-338
	UCCAGCAUCAGUGAUUUUGUUGA	UGUUGA	11.3	7.8	1.44872
hsa-mir-339
	UCCCUGUCCUCCAGGAGCUCA	AGCUCA	6.8	9.6	0.708333
	UCCCUGUCCUCCAGGAGCUCACG	CUCACG	4.9	5.4	0.907407
	UCCCUGUCCUCCAGGAGCUCACGU	UCACGU	4.5	1.5	3
	UGAGCGCCUCGACGACAGAGC	CAGAGC	12.4	11.3	1.09735
	UGAGCGCCUCGACGACAGAGCC	AGAGCC	30.3	47.1	0.643312
	UGAGCGCCUCGACGACAGAGCCG	GAGCCG	27.8	30.4	0.914474
	GAGCGCCUCGACGACAGAGCCG	GAGCCG	1.7	4.2	0.404762
	AGCGCCUCGACGACAGAGCCG	GAGCCG	13.2	31.6	0.417722
	AGCGCCUCGACGACAGAGCCGG	AGCCGG	1.1	2.5	0.44
hsa-mir-33a
	GUGCAUUGUAGUUGCAUUGC	CAUUGC	24.1	14.5	1.66207
	GUGCAUUGUAGUUGCAUUGCA	AUUGCA	121.9	52.5	2.3219
hsa-mir-33b
	GUGCAUUGCUGUUGCAUUG	GCAUUG	3.8	3.7	1.02703
	GUGCAUUGCUGUUGCAUUGC	CAUUGC	14.7	7.6	1.93421
	GUGCAUUGCUGUUGCAUUGCA	AUUGCA	4.7	3.2	1.46875
	CGUGUGUGAGGCGGGUG	CGGGUG	0.4	8.8	0.0454545
	CAGUGCCUCGGCAGUGCAGCC	GCAGCC	0.2	2.7	0.0740741
hsa-mir-340
	UUAUAAAGCAAUGAGACUG	AGACUG	0.9	2.5	0.36
	UUAUAAAGCAAUGAGACUGA	GACUGA	8.3	7.1	1.16901
	UUAUAAAGCAAUGAGACUGAU	ACUGAU	28	40.2	0.696517
	UUAUAAAGCAAUGAGACUGAUU	CUGAUU	162.7	133.8	1.21599
hsa-mir-342
	UCUCACACAGAAAUCGCACCCG	CACCCG	2.1	2.9	0.724138
	UCUCACACAGAAAUCGCACCCGU	ACCCGU	18.2	20.8	0.875
	UCUCACACAGAAAUCGCACCCGUC	CCCGUC	28.6	29.4	0.972789
	UCUCACACAGAAAUCGCACCCGUCA	CCGUCA	9	6.6	1.36364
	UCACACAGAAAUCGCACCCGUC	CCCGUC	1.9	1.2	1.58333
	UCACACAGAAAUCGCACCCGUCA	CCGUCA	7.5	3.9	1.92308
hsa-mir-345
	GCUGACUCCUAGUCCAGGGCU	AGGGCU	6.2	7.8	0.794872
	GCUGACUCCUAGUCCAGGGCUC	GGGCUC	17.3	26.7	0.64794
hsa-mir-34c
	AGGCAGUGUAGUUAGCUGAUUGC	GAUUGC	1.9	0.2	9.5
hsa-mir-361
	UUAUCAGAAUCUCCAGGGGUA	GGGGUA	7.5	4.9	1.53061
	UUAUCAGAAUCUCCAGGGGUAC	GGGUAC	8.3	8.1	1.02469
hsa-mir-365-1
	AGGGACUUUUGGGGGCAGAUGU	AGAUGU	3	6.1	0.491803
	AGGGACUUUUGGGGGCAGAUGUG	GAUGUG	1.7	16.9	0.100592
	AGGGACUUUUGGGGGCAGAUGUGU	AUGUGU	4.1	5.6	0.732143
	UAAUGCCCCUAAAAAUCCUUAU	CCUUAU	6.8	1	6.8
hsa-mir-365-2
	AGGGACUUUCAGGGGCAGCUGUG	GCUGUG	0.4	2.5	0.16
	UAAUGCCCCUAAAAAUCCUUAU	CCUUAU	6.8	1	6.8
hsa-mir-374a
	UUAUAAUACAACCUGAUAAGU	AUAAGU	14.7	30.4	0.483553
	UUAUAAUACAACCUGAUAAGUG	UAAGUG	52.4	77.2	0.678756
	CUUAUCAGAUUGUAUUGUAAU	UGUAAU	4.1	5.1	0.803922
	CUUAUCAGAUUGUAUUGUAAUU	GUAAUU	11.3	21.8	0.518349
hsa-mir-374b
	AUAUAAUACAACCUGCUAAGU	CUAAGU	8.6	10.8	0.796296
	AUAUAAUACAACCUGCUAAGUG	UAAGUG	179.8	112.5	1.59822
	AUAUAAUACAACCUGCUAAGUGU	AAGUGU	6	4.7	1.2766
	AUAAUACAACCUGCUAAGUG	UAAGUG	1.9	2.5	0.76
	CUUAGCAGGUUGUAUUAUCAUU	AUCAUU	2.4	6.4	0.375
hsa-mir-375
	UUUGUUCGUUCGGCUCGCGU	UCGCGU	2.1	1	2.1
	UUUGUUCGUUCGGCUCGCGUG	CGCGUG	8.5	4.9	1.73469
	UUUGUUCGUUCGGCUCGCGUGA	GCGUGA	73.8	30.6	2.41176
	UUGUUCGUUCGGCUCGCGUGA	GCGUGA	3.2	1	3.2
hsa-mir-378
	ACUGGACUUGGAGUCAG	AGUCAG	1.1	4.2	0.261905
	ACUGGACUUGGAGUCAGA	GUCAGA	2.1	1.2	1.75
	ACUGGACUUGGAGUCAGAA	UCAGAA	10	4.4	2.27273
	ACUGGACUUGGAGUCAGAAG	CAGAAG	99.2	46.8	2.11966
	ACUGGACUUGGAGUCAGAAGG	AGAAGG	853.3	422.8	2.01821
	ACUGGACUUGGAGUCAGAAGGC	GAAGGC	1739.2	917.7	1.89517
	ACUGGACUUGGAGUCAGAAGGCC	AAGGCC	3.6	2.9	1.24138
	CUGGACUUGGAGUCAGAAG	CAGAAG	2.3	1.2	1.91667
	CUGGACUUGGAGUCAGAAGG	AGAAGG	25.6	10.1	2.53465
	CUGGACUUGGAGUCAGAAGGC	GAAGGC	166.1	72.6	2.28788
	CUGGACUUGGAGUCAGAAGGCC	AAGGCC	3.8	1.7	2.23529
	UGGACUUGGAGUCAGAAGGC	GAAGGC	2.3	3.4	0.676471
hsa-mir-421
	AUCAACAGACAUUAAUUGGGCG	UGGGCG	19.2	20.6	0.932039
	AUCAACAGACAUUAAUUGGGCGC	GGGCGC	15.4	15	1.02667
	ACAGACAUUAAUUGGGCGCCUG	CGCCUG	2.8	3.2	0.875
hsa-mir-423
	UGAGGGGCAGAGAGCGA	GAGCGA	4.3	3.7	1.16216
	UGAGGGGCAGAGAGCGAG	AGCGAG	4.9	4.9	1
	UGAGGGGCAGAGAGCGAGA	GCGAGA	9.8	9.1	1.07692
	UGAGGGGCAGAGAGCGAGAC	CGAGAC	16.3	12.5	1.304
	UGAGGGGCAGAGAGCGAGACU	GAGACU	44.3	39	1.1359
	UGAGGGGCAGAGAGCGAGACUU	AGACUU	90.6	79.2	1.14394
	UGAGGGGCAGAGAGCGAGACUUU	GACUUU	840.3	732.9	1.14654
	UGAGGGGCAGAGAGCGAGACUUUU	ACUUUU	206.9	157.4	1.31449
	AGGGGCAGAGAGCGAGACUUUU	ACUUUU	2.6	2.5	1.04
	AAGCUCGGUCUGAGGCC	GAGGCC	8.6	6.4	1.34375
	AAGCUCGGUCUGAGGCCC	AGGCCC	6.6	4.7	1.40426
	AAGCUCGGUCUGAGGCCCCU	GCCCCU	3.9	2.7	1.44444
	AAGCUCGGUCUGAGGCCCCUCA	CCCUCA	7.9	2.9	2.72414
	AAGCUCGGUCUGAGGCCCCUCAG	CCUCAG	8.5	6.9	1.23188
	AAGCUCGGUCUGAGGCCCCUCAGU	CUCAGU	39.1	22.3	1.75336
	AGCUCGGUCUGAGGCCC	AGGCCC	13.2	6.6	2
	AGCUCGGUCUGAGGCCCC	GGCCCC	5.4	4.2	1.28571
	AGCUCGGUCUGAGGCCCCU	GCCCCU	6.4	4.9	1.30612
	AGCUCGGUCUGAGGCCCCUC	CCCCUC	4.9	4.7	1.04255
	AGCUCGGUCUGAGGCCCCUCA	CCCUCA	17.5	9.1	1.92308
	AGCUCGGUCUGAGGCCCCUCAG	CCUCAG	40.2	29.2	1.37671
	AGCUCGGUCUGAGGCCCCUCAGU	CUCAGU	256.9	162	1.5858
hsa-mir-424
	CAGCAGCAAUUCAUGUUUUG	GUUUUG	2.1	1	2.1
	CAGCAGCAAUUCAUGUUUUGA	UUUUGA	7	2.5	2.8
	CAGCAGCAAUUCAUGUUUUGAA	UUUGAA	4.9	2.5	1.96
	CAAAACGUGAGGCGCUGCUAU	UGCUAU	7.7	48	0.160417
	CAAAACGUGAGGCGCUGCUAUA	GCUAUA	4.1	28.7	0.142857
hsa-mir-425
	AAUGACACGAUCACUCCCGUUG	CCGUUG	5.1	3.4	1.5
	AAUGACACGAUCACUCCCGUUGA	CGUUGA	20.1	20.1	1
	AAUGACACGAUCACUCCCGUUGAG	GUUGAG	5.3	4.2	1.2619
	AAUGACACGAUCACUCCCGUUGAGU	UUGAGU	6.2	6.9	0.898551
	AUGACACGAUCACUCCCGUUGAG	GUUGAG	2.1	1.2	1.75
	AUGACACGAUCACUCCCGUUGAGU	UUGAGU	2.3	3.7	0.621622
	CAUCGGGAAUGUCGUGUCCGC	GUCCGC	1.7	2.5	0.68
	CAUCGGGAAUGUCGUGUCCGCC	UCCGCC	2.6	11.8	0.220339
	AUCGGGAAUGUCGUGUCCGC	GUCCGC	3	2.5	1.2
	AUCGGGAAUGUCGUGUCCGCC	UCCGCC	10	12.5	0.8
hsa-mir-429
	UAAUACUGUCUGGUAAAACCG	AAACCG	3.2	7.4	0.432432
	UAAUACUGUCUGGUAAAACCGU	AACCGU	30.3	28.2	1.07447
hsa-mir-448
	UUGCAUAUGUAGGAUGUCCC	UGUCCC	3.9	3.9	1
	UUGCAUAUGUAGGAUGUCCCA	GUCCCA	8.3	4.7	1.76596
hsa-mir-452
	AACUGUUUGCAGAGGAAACU	GAAACU	2.3	1.5	1.53333
	AACUGUUUGCAGAGGAAACUG	AAACUG	6.8	5.4	1.25926
	AACUGUUUGCAGAGGAAACUGA	AACUGA	113.9	74.3	1.53297
	AACUGUUUGCAGAGGAAACUGAG	ACUGAG	382.8	287	1.3338
	AACUGUUUGCAGAGGAAACUGAGA	CUGAGA	207.3	220.6	0.93971
	ACUGUUUGCAGAGGAAACUGAG	ACUGAG	2.6	2.9	0.896552
	ACUGUUUGCAGAGGAAACUGAGA	CUGAGA	3	3.4	0.882353
	CUGUUUGCAGAGGAAACUGAGA	CUGAGA	4.1	4.4	0.931818
	UGUUUGCAGAGGAAACUGAGA	CUGAGA	20.5	21.1	0.971564
	UGUUUGCAGAGGAAACUGAGAC	UGAGAC	83.6	61.3	1.36378
	UGUUUGCAGAGGAAACUGAGACU	GAGACU	3	1.7	1.76471
hsa-mir-455
	GUAUGUGCCUUUGGACUACAU	CUACAU	2.3	1.2	1.91667
	GUAUGUGCCUUUGGACUACAUCGU	CAUCGU	2.4	0.5	4.8
	UAUGUGCCUUUGGACUACAUCG	ACAUCG	4.9	3.7	1.32432
hsa-mir-484
	UCAGGCUCAGUCCCCUCCCGAU	CCCGAU	1.9	0.7	2.71429
hsa-mir-486
	UCCUGUACUGAGCUGCCCCGA	CCCCGA	1.7	2.5	0.68
	UCCUGUACUGAGCUGCCCCGAG	CCCGAG	3.4	2.9	1.17241
hsa-mir-497
	CAGCAGCACACUGUGGUUUGUA	UUUGUA	3	3.2	0.9375
hsa-mir-499
	UUAAGACUUGCAGUGAUGUUU	AUGUUU	1.7	2.5	0.68
	UUAAGACUUGCAGUGAUGUUUA	UGUUUA	4.7	4.9	0.959184
hsa-mir-500
	AUGCACCUGGGCAAGGAUUCU	GAUUCU	4.1	2	2.05
hsa-mir-502
	AAUGCACCUGGGCAAGGAUUCA	GAUUCA	3	5.1	0.588235
	AAUGCACCUGGGCAAGGAUUCAG	AUUCAG	6.2	6.4	0.96875
hsa-mir-503
	UAGCAGCGGGAACAGUUC	CAGUUC	2.1	2	1.05
	UAGCAGCGGGAACAGUUCU	AGUUCU	6	7.4	0.810811
	UAGCAGCGGGAACAGUUCUG	GUUCUG	8.1	4.7	1.7234
	UAGCAGCGGGAACAGUUCUGCA	UCUGCA	10.7	7.8	1.37179
	UAGCAGCGGGAACAGUUCUGCAG	CUGCAG	17.5	17.4	1.00575
hsa-mir-505
	GGGAGCCAGGAAGUAUUGAUGUU	GAUGUU	2.8	5.4	0.518519
hsa-mir-532
	CAUGCCUUGAGUGUAGGACCGU	GACCGU	33.1	25	1.324
	CCUCCCACACCCAAGGCUUGCA	CUUGCA	1.7	2.5	0.68
hsa-mir-548e
	AAAAACUGAGACUACUUUUGC	UUUUGC	0.6	3.2	0.1875
	AAAAACUGAGACUACUUUUGCA	UUUGCA	4.5	5.9	0.762712
hsa-mir-548h-1
	AAAAGUAAUCGCGGUUUUUGU	UUUUGU	0.9	2.7	0.333333
hsa-mir-548h-2
	AAAAGUAAUCGCGGUUUUUGU	UUUUGU	0.9	2.7	0.333333
hsa-mir-548h-3
	AAAAGUAAUCGCGGUUUUUGU	UUUUGU	0.9	2.7	0.333333
hsa-mir-548h-4
	AAAAGUAAUCGCGGUUUUUGU	UUUUGU	0.9	2.7	0.333333
hsa-mir-548j
	AAAAGUAAUUGCGGUCUUUGGU	UUUGGU	8.5	3.9	2.17949
hsa-mir-548k
	AAAAGUACUUGCGGAUUUUGCU	UUUGCU	14.5	7.4	1.95946
hsa-mir-548l
	AAAAGUAUUUGCGGGUUUUGU	UUUUGU	1.5	3.2	0.46875
	AAAAGUAUUUGCGGGUUUUGUC	UUUGUC	3.2	6.4	0.5
hsa-mir-574
	UGAGUGUGUGUGUGUGAGUGU	GAGUGU	0.9	3.2	0.28125
	UGAGUGUGUGUGUGUGAGUGUGU	GUGUGU	1.3	2.9	0.448276
	UGAGUGUGUGUGUGUGAGUGUGUG	UGUGUG	0.9	2.5	0.36
	UGAGUGUGUGUGUGUGAGUGUGUGU	GUGUGU	2.3	3.9	0.589744
	CACGCUCAUGCACACACCCACA	CCCACA	3.6	2.2	1.63636
hsa-mir-576
	AAGAUGUGGAAAAAUUGGAAUC	GGAAUC	2.4	0.7	3.42857
	AAGAUGUGGAAAAAUUGGAAUCC	GAAUCC	1.9	1.5	1.26667
hsa-mir-582
	UUACAGUUGUUCAACCAGUUA	CAGUUA	2.3	1.5	1.53333
	UUACAGUUGUUCAACCAGUUACU	GUUACU	6	4.7	1.2766
	UACAGUUGUUCAACCAGUUACU	GUUACU	1.9	1.5	1.26667
	UAACUGGUUGAACAACUGAAC	CUGAAC	2.3	1	2.3
hsa-mir-584
	UUAUGGUUUGCCUGGGACU	GGGACU	2.1	0.7	3
	UUAUGGUUUGCCUGGGACUG	GGACUG	12.8	7.1	1.80282
	UUAUGGUUUGCCUGGGACUGA	GACUGA	72.9	47.3	1.54123
	UUAUGGUUUGCCUGGGACUGAG	ACUGAG	3	2.2	1.36364
hsa-mir-589
	UGAGAACCACGUCUGCUCUGA	CUCUGA	11.8	12	0.983333
	UGAGAACCACGUCUGCUCUGAGC	CUGAGC	1.9	1.7	1.11765
	UCAGAACAAAUGCCGGUUCCCA	UUCCCA	1.9	1.5	1.26667
hsa-mir-590
	GAGCUUAUUCAUAAAAGUGCAG	GUGCAG	4.5	2.9	1.55172
	UAAUUUUAUGUAUAAGCUAGU	GCUAGU	2.4	1	2.4
hsa-mir-615
	GGGGGUCCCCGGUGCUCGGAU	UCGGAU	1.5	3.9	0.384615
	GGGGGUCCCCGGUGCUCGGAUC	CGGAUC	0.6	7.4	0.0810811
hsa-mir-619
	GCUGGGAUUACAGGCAUG	GGCAUG	2.3	0.2	11.5
	CUGGGAUUACAGGCAUGAG	CAUGAG	1.9	0.2	9.5
	GGGAUUACAGGCAUGAGCCA	GAGCCA	1.9	0	∞
hsa-mir-624
	UAGUACCAGUACCUUGUGUUCA	UGUUCA	1.3	3.2	0.40625
hsa-mir-625
	AGGGGGAAAGUUCUAUAGUCCU	AGUCCU	2.1	1	2.1
hsa-mir-629
	UGGGUUUACGUUGGGAG	UGGGAG	55.6	27.5	2.02182
	UGGGUUUACGUUGGGAGA	GGGAGA	17.5	12.3	1.42276
	UGGGUUUACGUUGGGAGAA	GGAGAA	32.7	19.4	1.68557
	UGGGUUUACGUUGGGAGAAC	GAGAAC	4.9	0.7	7
	UGGGUUUACGUUGGGAGAACU	AGAACU	5.6	2.9	1.93103
	UGGGUUUACGUUGGGAGAACUU	GAACUU	3	3.4	0.882353
hsa-mir-642
	AGACACAUUUGGAGAGGGAAC	GGGAAC	0.6	3.9	0.153846
	AGACACAUUUGGAGAGGGAACC	GGAACC	0	2.9	0
hsa-mir-651
	UUUAGGAUAAGCUUGACUUUUG	CUUUUG	1.3	3.2	0.40625
hsa-mir-652
	AAUGGCGCCACUAGGGUUGUG	GUUGUG	10.7	3.7	2.89189
hsa-mir-659
	AGGACCUUCCCUGAACCAAGGA	CAAGGA	1.9	1	1.9
hsa-mir-660
	UACCCAUUGCAUAUCGGAGUUG	GAGUUG	7.1	11.8	0.601695
	UACCCAUUGCAUAUCGGAGUUGU	AGUUGU	5.1	5.9	0.864407
hsa-mir-663
	CGGGGCGCCGCGGGACCGC	GACCGC	3.2	0	∞
	CGGGGCGCCGCGGGACCGCCC	CCGCCC	5.1	0.2	25.5
hsa-mir-664
	ACUGGCUAGGGAAAAUGAUUGG	GAUUGG	6.6	6.4	1.03125
	ACUGGCUAGGGAAAAUGAUUGGA	AUUGGA	7.1	4.4	1.61364
	CUGGCUAGGGAAAAUGAUUGGA	AUUGGA	7.7	6.6	1.16667
	UGGCUAGGGAAAAUGAUUGGA	AUUGGA	2.3	1	2.3
hsa-mir-671
	AGGAAGCCCUGGAGGGGCUGGAGGU	GGAGGU	3	0.5	6
hsa-mir-675
	UGGUGCGGAGAGGGCCC	GGGCCC	5.4	4.9	1.10204
	UGGUGCGGAGAGGGCCCA	GGCCCA	25.6	19.6	1.30612
	UGGUGCGGAGAGGGCCCAC	GCCCAC	13.5	9.1	1.48352
	UGGUGCGGAGAGGGCCCACA	CCCACA	6	5.1	1.17647
	UGGUGCGGAGAGGGCCCACAG	CCACAG	5.1	4.4	1.15909
	UGGUGCGGAGAGGGCCCACAGU	CACAGU	12.6	8.3	1.51807
	UGGUGCGGAGAGGGCCCACAGUG	ACAGUG	36.8	30.9	1.19094
	GGUGCGGAGAGGGCCCACAGUG	ACAGUG	2.1	2.5	0.84
hsa-mir-675b
	UGGUGCGGAGAGGGCCC	GGGCCC	5.4	4.9	1.10204
	UGGUGCGGAGAGGGCCCA	GGCCCA	25.6	19.6	1.30612
	UGGUGCGGAGAGGGCCCAC	GCCCAC	13.5	9.1	1.48352
	UGGUGCGGAGAGGGCCCACA	CCCACA	6	5.1	1.17647
	UGGUGCGGAGAGGGCCCACAG	CCACAG	5.1	4.4	1.15909
	UGGUGCGGAGAGGGCCCACAGU	CACAGU	12.6	8.3	1.51807
	UGGUGCGGAGAGGGCCCACAGUG	ACAGUG	36.8	30.9	1.19094
	GGUGCGGAGAGGGCCCACAGUG	ACAGUG	2.1	2.5	0.84
hsa-mir-7-1
	UGGAAGACUAGUGAUUU	UGAUUU	17.5	8.8	1.98864
	UGGAAGACUAGUGAUUUUG	AUUUUG	3.4	1.2	2.83333
	UGGAAGACUAGUGAUUUUGU	UUUUGU	8.6	5.1	1.68627
	UGGAAGACUAGUGAUUUUGUU	UUUGUU	19.7	10.5	1.87619
	UGGAAGACUAGUGAUUUUGUUG	UUGUUG	25	10.8	2.31481
	UGGAAGACUAGUGAUUUUGUUGU	UGUUGU	164.2	64.2	2.55763
	UGGAAGACUAGUGAUUUUGUUGUU	GUUGUU	291.3	141.7	2.05575
	UGGAAGACUAGUGAUUUUGUUGUUU	UUGUUU	13.3	5.6	2.375
	CAACAAAUCACAGUCUGCCAUA	GCCAUA	1.9	5.6	0.339286
hsa-mir-7-2
	UGGAAGACUAGUGAUUU	UGAUUU	17.5	8.8	1.98864
	UGGAAGACUAGUGAUUUUG	AUUUUG	3.4	1.2	2.83333
	UGGAAGACUAGUGAUUUUGU	UUUUGU	8.6	5.1	1.68627
	UGGAAGACUAGUGAUUUUGUU	UUUGUU	19.7	10.5	1.87619
	UGGAAGACUAGUGAUUUUGUUG	UUGUUG	25	10.8	2.31481
	UGGAAGACUAGUGAUUUUGUUGU	UGUUGU	164.2	64.2	2.55763
	UGGAAGACUAGUGAUUUUGUUGUU	GUUGUU	291.3	141.7	2.05575
hsa-mir-7-3
	UGGAAGACUAGUGAUUU	UGAUUU	17.5	8.8	1.98864
	UGGAAGACUAGUGAUUUUG	AUUUUG	3.4	1.2	2.83333
	UGGAAGACUAGUGAUUUUGU	UUUUGU	8.6	5.1	1.68627
	UGGAAGACUAGUGAUUUUGUU	UUUGUU	19.7	10.5	1.87619
	UGGAAGACUAGUGAUUUUGUUG	UUGUUG	25	10.8	2.31481
	UGGAAGACUAGUGAUUUUGUUGU	UGUUGU	164.2	64.2	2.55763
	UGGAAGACUAGUGAUUUUGUUGUU	GUUGUU	291.3	141.7	2.05575
hsa-mir-720
	AUCUCGCUGGGGCCUCCA	CCUCCA	0.2	7.6	0.0263158
	UCUCGCUGGGGCCUCCA	CCUCCA	0	13.7	0
hsa-mir-744
	UGCGGGGCUAGGGCUAA	GGCUAA	2.8	3.7	0.756757
	UGCGGGGCUAGGGCUAAC	GCUAAC	2.8	3.4	0.823529
	UGCGGGGCUAGGGCUAACA	CUAACA	5.4	3.2	1.6875
	UGCGGGGCUAGGGCUAACAG	UAACAG	36.8	38.7	0.950904
	UGCGGGGCUAGGGCUAACAGC	AACAGC	79.3	62	1.27903
	UGCGGGGCUAGGGCUAACAGCA	ACAGCA	589.6	490.5	1.20204
	UGCGGGGCUAGGGCUAACAGCAG	CAGCAG	13.3	11.3	1.17699
	UGCGGGGCUAGGGCUAACAGCAGU	AGCAGU	5.4	3.9	1.38462
	GCGGGGCUAGGGCUAACAGC	AACAGC	2.1	1	2.1
	GCGGGGCUAGGGCUAACAGCA	ACAGCA	34.8	21.1	1.64929
hsa-mir-760
	CGGCUCUGGGUCUGUGGGGA	UGGGGA	2.4	0.7	3.42857
	CGGCUCUGGGUCUGUGGGGAG	GGGGAG	3.4	4.9	0.693878
hsa-mir-766
	AGGAGGAAUUGGUGCUGGUCU	UGGUCU	2.8	1	2.8
	AGGAGGAAUUGGUGCUGGUCUU	GGUCUU	6.2	6.4	0.96875
	AGGAGGAAUUGGUGCUGGUCUUU	GUCUUU	3.8	4.4	0.863636
	AGGAGGAAUUGGUGCUGGUCUUUCA	CUUUCA	0.4	2.7	0.148148
hsa-mir-767
	UGCACCAUGGUUGUCUGAGCA	UGAGCA	1.9	1	1.9
	UGCACCAUGGUUGUCUGAGCAU	GAGCAU	9.8	11.5	0.852174
hsa-mir-769
	UGAGACCUCUGGGUUCUGAGC	CUGAGC	1.9	1.5	1.26667
	UGAGACCUCUGGGUUCUGAGCU	UGAGCU	10.5	4.9	2.14286
hsa-mir-873
	GCAGGAACUUGUGAGUCUCCUA	CUCCUA	4.1	4.2	0.97619
	GCAGGAACUUGUGAGUCUCCUAU	UCCUAU	2.6	2.5	1.04
	GGAGACUGAUGAGUUCCCGGGA	CCGGGA	4.5	3.2	1.40625
hsa-mir-877
	GUAGAGGAGAUGGCGCAGGGGA	AGGGGA	0.8	2.5	0.32
	GUAGAGGAGAUGGCGCAGGGGAC	GGGGAC	1.3	5.9	0.220339
	GUAGAGGAGAUGGCGCAGGGGACA	GGGACA	3	6.9	0.434783
	UAGAGGAGAUGGCGCAGGGGACA	GGGACA	2.3	2.5	0.92
hsa-mir-886
	ACCCGGGUCGGAGUUAGCUCAAGCGG	AAGCGG	1.3	6.9	0.188406
	ACCCGGGUCGGAGUUAGCUCAAGCGGU	AGCGGU	1.9	9.6	0.197917
	CCCGGGUCGGAGUUAGCUCAAGCGGU	AGCGGU	2.3	2	1.15
	CCGGGUCGGAGUUAGCUCAAGCGG	AAGCGG	24.2	13.2	1.83333
	CCGGGUCGGAGUUAGCUCAAGCGGU	AGCGGU	19.9	24	0.829167
	CCGGGUCGGAGUUAGCUCAAGCGGUU	GCGGUU	5.1	8.8	0.579545
	CGGGUCGGAGUUAGCUCAAGC	UCAAGC	2.3	1.5	1.53333
	CGGGUCGGAGUUAGCUCAAGCG	CAAGCG	5.8	4.7	1.23404
	CGGGUCGGAGUUAGCUCAAGCGG	AAGCGG	312.3	227.7	1.37154
	CGGGUCGGAGUUAGCUCAAGCGGU	AGCGGU	674.8	598.6	1.1273
	CGGGUCGGAGUUAGCUCAAGCGGUU	GCGGUU	160.8	201.7	0.797224
	CGGGUCGGAGUUAGCUCAAGCGGUUA	CGGUUA	16	20.1	0.79602
	GGGUCGGAGUUAGCUCAAGC	UCAAGC	0.2	5.6	0.0357143
	GGGUCGGAGUUAGCUCAAGCG	CAAGCG	0.2	5.9	0.0338983
	GGGUCGGAGUUAGCUCAAGCGG	AAGCGG	39.8	500.8	0.0794728
	GGGUCGGAGUUAGCUCAAGCGGU	AGCGGU	99	1130	0.0876106
	GGGUCGGAGUUAGCUCAAGCGGUU	GCGGUU	26.5	455.4	0.0581906
	GGGUCGGAGUUAGCUCAAGCGGUUA	CGGUUA	8.6	100	0.086
	GGGUCGGAGUUAGCUCAAGCGGUUAC	GGUUAC	2.1	6.1	0.344262
	GGUCGGAGUUAGCUCAAGCGGU	AGCGGU	0.6	2.9	0.206897
	CAUCUCUGUGCUGGGGUU	GGGGUU	0.2	4.7	0.0425532
	CGCGGGUGCUUACUGACCCUU	ACCCUU	19	11.8	1.61017
	CGCGGGUGCUUACUGACCCUUU	CCCUUU	17.5	10.1	1.73267
	CGCGGGUGCUUACUGACCCUUUU	CCUUUU	2.4	1	2.4
hsa-mir-923
	UCAGCGGAGGAAAAGAAACUAACCAGGA	CCAGGA	0.6	3.7	0.162162
	AGCGGAGGAAAAGAAACU	GAAACU	0.6	3.4	0.176471
	GCGGAGGAAAAGAAACUAACCAGGA	CCAGGA	0.4	3.9	0.102564
hsa-mir-92a-1
	AGGUUGGGAUCGGUUGCAAU	UGCAAU	0	3.7	0
	AGGUUGGGAUCGGUUGCAAUG	GCAAUG	0.2	6.9	0.0289855
	AGGUUGGGAUCGGUUGCAAUGC	CAAUGC	2.6	30.2	0.0860927
	AGGUUGGGAUCGGUUGCAAUGCU	AAUGCU	12.2	438.5	0.0278221
	UAUUGCACUUGUCCCGG	UCCCGG	2.4	2	1.2
	UAUUGCACUUGUCCCGGC	CCCGGC	15.2	11	1.38182
	UAUUGCACUUGUCCCGGCC	CCGGCC	13.2	9.1	1.45055
	UAUUGCACUUGUCCCGGCCU	CGGCCU	66	59.3	1.11298
	UAUUGCACUUGUCCCGGCCUG	GGCCUG	112	106.6	1.05066
	UAUUGCACUUGUCCCGGCCUGU	GCCUGU	1705.4	1290.8	1.3212
	UAUUGCACUUGUCCCGGCCUGUU	CCUGUU	80.8	45.1	1.79157
	AUUGCACUUGUCCCGGCCUG	GGCCUG	2.1	3.7	0.567568
	AUUGCACUUGUCCCGGCCUGU	GCCUGU	31	37.7	0.822281
hsa-mir-92a-2
	UAUUGCACUUGUCCCGG	UCCCGG	2.4	2	1.2
	UAUUGCACUUGUCCCGGC	CCCGGC	15.2	11	1.38182
	UAUUGCACUUGUCCCGGCC	CCGGCC	13.2	9.1	1.45055
	UAUUGCACUUGUCCCGGCCU	CGGCCU	66	59.3	1.11298
	UAUUGCACUUGUCCCGGCCUG	GGCCUG	112	106.6	1.05066
	UAUUGCACUUGUCCCGGCCUGU	GCCUGU	1705.4	1290.8	1.3212
	AUUGCACUUGUCCCGGCCUG	GGCCUG	2.1	3.7	0.567568
	AUUGCACUUGUCCCGGCCUGU	GCCUGU	31	37.7	0.822281
hsa-mir-92b
	AGGGACGGGACGCGGUGCAG	GUGCAG	1.9	1.7	1.11765
	AGGGACGGGACGCGGUGCAGU	UGCAGU	6.8	4.4	1.54545
	AGGGACGGGACGCGGUGCAGUG	GCAGUG	4.7	3.9	1.20513
	AGGGACGGGACGCGGUGCAGUGU	CAGUGU	34.2	25.2	1.35714
	AGGGACGGGACGCGGUGCAGUGUU	AGUGUU	33.4	40	0.835
	AUAUUGCACUCGUCCCGGCCUCC	GCCUCC	3	3.2	0.9375
	UAUUGCACUCGUCCCGG	UCCCGG	7.7	9.8	0.785714
	UAUUGCACUCGUCCCGGC	CCCGGC	23.5	20.1	1.16915
	UAUUGCACUCGUCCCGGCC	CCGGCC	49.2	43.1	1.14153
	UAUUGCACUCGUCCCGGCCU	CGGCCU	290.9	245.4	1.18541
	UAUUGCACUCGUCCCGGCCUC	GGCCUC	248.4	187.8	1.32268
	UAUUGCACUCGUCCCGGCCUCC	GCCUCC	301.6	224	1.34643
	AUUGCACUCGUCCCGGCCUCC	GCCUCC	2.4	3.2	0.75
hsa-mir-93
	CAAAGUGCUGUUCGUGCAG	GUGCAG	3.6	8.6	0.418605
	CAAAGUGCUGUUCGUGCAGG	UGCAGG	6.6	5.4	1.22222
	CAAAGUGCUGUUCGUGCAGGU	GCAGGU	18.2	20.8	0.875
	CAAAGUGCUGUUCGUGCAGGUA	CAGGUA	97.9	103	0.950485
	CAAAGUGCUGUUCGUGCAGGUAG	AGGUAG	641.5	849.8	0.754884
	CAAAGUGCUGUUCGUGCAGGUAGU	GGUAGU	38.7	52.5	0.737143
	AAAGUGCUGUUCGUGCAGGUA	CAGGUA	2.1	0.2	10.5
	AAAGUGCUGUUCGUGCAGGUAG	AGGUAG	10.9	8.8	1.23864
hsa-mir-935
	CAGUUACCGCUUCCGCUACCG	CUACCG	2.3	2.5	0.92
	CAGUUACCGCUUCCGCUACCGC	UACCGC	3.9	0.5	7.8
hsa-mir-940
	AAGGCAGGGCCCCCGCUCCCC	CUCCCC	3.6	1	3.6
hsa-mir-941-1
	CACCCGGCUGUGUGCACAUGUG	CAUGUG	6	7.6	0.789474
	CACCCGGCUGUGUGCACAUGUGC	AUGUGC	25.4	25.2	1.00794
hsa-mir-941-2
	CACCCGGCUGUGUGCACAUGUG	CAUGUG	6	7.6	0.789474
	CACCCGGCUGUGUGCACAUGUGC	AUGUGC	25.4	25.2	1.00794
hsa-mir-941-3
	CACCCGGCUGUGUGCACAUGUG	CAUGUG	6	7.6	0.789474
	CACCCGGCUGUGUGCACAUGUGC	AUGUGC	25.4	25.2	1.00794
hsa-mir-941-4
	CACCCGGCUGUGUGCACAUGUG	CAUGUG	6	7.6	0.789474
	CACCCGGCUGUGUGCACAUGUGC	AUGUGC	25.4	25.2	1.00794
	CACCCGGCUGUGUGCACAUGUG	CAUGUG	6	7.6	0.789474
	CACCCGGCUGUGUGCACAUGUGC	AUGUGC	25.4	25.2	1.00794
hsa-mir-942
	UCUUCUCUGUUUUGGCCAUGUG	CAUGUG	0.9	2.9	0.310345
	UUCUCUGUUUUGGCCAUGUGUG	UGUGUG	1.3	2.7	0.481481
hsa-mir-944
	GAAAUUAUUGUACAUCGGAUGA	GGAUGA	2.1	6.1	0.344262
	GAAAUUAUUGUACAUCGGAUGAG	GAUGAG	8.1	35.3	0.229462
	AAAUUAUUGUACAUCGGAUGA	GGAUGA	5.4	6.4	0.84375
	AAAUUAUUGUACAUCGGAUGAG	GAUGAG	72.3	103.9	0.695861
	AAUUAUUGUACAUCGGAUGAG	GAUGAG	13.7	25	0.548
hsa-mir-95
	UUCAACGGGUAUUUAUUGA	UAUUGA	2.6	3.7	0.702703
	UUCAACGGGUAUUUAUUGAG	AUUGAG	9	7.4	1.21622
	UUCAACGGGUAUUUAUUGAGC	UUGAGC	2.8	3.7	0.756757
	UUCAACGGGUAUUUAUUGAGCA	UGAGCA	62.4	94.6	0.659619
	UCAACGGGUAUUUAUUGAGCA	UGAGCA	9.2	9.8	0.938776
	AACGGGUAUUUAUUGAGCA	UGAGCA	2.1	1.5	1.4
hsa-mir-96
	UUUGGCACUAGCACAUUUUUG	UUUUUG	2.3	1	2.3
	UUUGGCACUAGCACAUUUUUGCU	UUUGCU	14.3	8.3	1.72289
hsa-mir-98
	UGAGGUAGUAAGUUGUAU	UUGUAU	56	24.5	2.28571
	UGAGGUAGUAAGUUGUAUU	UGUAUU	7.3	7.1	1.02817
	UGAGGUAGUAAGUUGUAUUG	GUAUUG	12.8	7.6	1.68421
	UGAGGUAGUAAGUUGUAUUGU	UAUUGU	53.2	35.1	1.51567
	UGAGGUAGUAAGUUGUAUUGUU	AUUGUU	930.3	430.4	2.16148
	UGAGGUAGUAAGUUGUAUUGUUG	UUGUUG	5.8	2.2	2.63636
	GAGGUAGUAAGUUGUAUUGUU	AUUGUU	2.8	1	2.8
hsa-mir-99a
	AACCCGUAGAUCCGAUCUUGU	UCUUGU	14.8	22.8	0.649123
	AACCCGUAGAUCCGAUCUUGUG	CUUGUG	88.7	96.3	0.92108
hsa-mir-99b
	CACCCGUAGAACCGACC	CCGACC	2.1	2	1.05
	CACCCGUAGAACCGACCU	CGACCU	2.1	2.9	0.724138
	CACCCGUAGAACCGACCUUG	ACCUUG	2.4	2.2	1.09091
	CACCCGUAGAACCGACCUUGC	CCUUGC	75.3	55.6	1.35432
	CACCCGUAGAACCGACCUUGCG	CUUGCG	401.4	287.5	1.39617
	CACCCGUAGAACCGACCUUGCGG	UUGCGG	6.8	6.1	1.11475
	ACCCGUAGAACCGACCUUGCG	CUUGCG	4.1	2.7	1.51852
	CAAGCUCGUGUCUGUGGGUCCG	GGUCCG	6.4	5.4	1.18519
	CAAGCUCGUGUCUGUGGGUCCGU	GUCCGU	8.3	5.4	1.53704
