# Supplementary material for: Deep Sequencing of Human Nuclear and Cytoplasmic Small RNAs Reveals an Unexpectedly Complex Subcellular Distribution of miRNAs and tRNA 3′ Trailers
Source: PLoS One. 2010 May 14;5(5):e10563. doi: 10.1371/journal.pone.0010563 (PMC2871053; doi:10.1371/journal.pone.0010563)
Supplement: Table S6 — A large number of tRNA 3′ trailers are accumulated in different cells of human and diverse vertebrates. We employed the total count of all isotrailers of a given tRNA 3′ trailer to represent its read count. tRNA 3′ trailers of human and chicken with raw read counts more than 10 in at least one library were listed. The sequence indicates the most abundant tRNA 3′trailer sequence from cytoplasmic sRNA library in human, CE5 sRNA library in chicken. Cytoplasmic, nuclear, hESCs, EBs, CE5, CE7, CE9 and dog lymphocyte represent the read counts in cytoplasmic, nuclear, human pluripotent human embryonic stem cells, human embryoid bodies, 5-day-old chicken embryo, 7-day-old chicken embryo, 9-day-old chicken embryo and dog lymphocyte sRNA libraries, respectively. C/N indicates the ratio of cytoplasmic sRNA library count to nuclear sRNA library count of each unique sequence. Read counts of each sequence were normalized to reads per million (RPM). (0.03 MB XLS) [file pone.0010563.s008.xls]

## Sheet: Supplemental table 6
Table S6. A large number of tRNA 3' trailers are accumulated in different cells of human and diverse vertebrates. We employed the total count of all isotrailers of a given tRNA 3' trailer to represent its read count. tRNA 3' trailers of human and chicken with raw read counts more than 10 in at least one library were listed. The sequence indicates the most abundant tRNA 3'trailer sequence from cyt…
Human								Chicken						Dog
tRNA	Sequence	Cytoplasmic	Nuclear	hESC	EB	C/N		tRNA	Sequence	CE5	CE7	CE9		tRNA	Sequence	Dog lymphocyte
tRNA-Ala(CGC)	AGGCGAUCACGUAGAUUUUGUUUA	853	203.3	2076.1	534.6	4.19577		tRNA-Ala(AGC)	CUUACUGUUUGCUUUU	0.6	5.4	0.3		tRNA-Arg(CCG)	UGCAGUGGUCGUUUUU	54.3
tRNA-Ala(TGC)	AGCGAUGGUUUUGCUCUGGUAGUUUU	2.5	0.2	1.7	0.5	12.5		tRNA-Ala(TGC)	CGGGCGCCCAGUACUUU	4.4	28	3.2		tRNA-Arg(TCG)	AAGGGAGUCUGCCUACAAUUU	5.7
tRNA-Arg(ACG)	GUGUAAGCAGGGUCGUUUU	1176.6	196	371.9	165.5	6.00306		tRNA-Arg(CCT)	AGCGGAUUGCCCUUUUCUCGCUUUU	67.7	331	29.3		tRNA-Asp(GTC)	ACAGCGAAGGCUCUUU	10.4
	GGUGUUAAUCUUGGCUUUU	7.4	0.6	15.1	28.5	12.3333		tRNA-Arg(TCT)	AACAGAGGUGGUGUACUCUUUU	138.4	56.4	30.2		tRNA-Leu(TAG)	ACCCAGGACGGUCUCA	9612.7
tRNA-Arg(CCG)	UUGCCAUGUUAACGUUUU	3.7	0.2	8	11.4	18.5		tRNA-Asn(GTT)	GGGGUUGUCAUCUCUUGAUCUU	22.9	8.6	4.5		tRNA-Ser(TGA)	AAGCGGGUGGCUUCUCUUUU	237.1
tRNA-Arg(CCT)	AAGAAAGGCCGAAUUUUA	41.2	5.1	33.1	57.6	8.07843			AGGAAGGGGAGCUUUUU	98.4	167.6	14.3		tRNA-Thr(AGT)	AACCGAGCGUCCCGGCUCUCUU	25.8
	UCGAGAGGGGCUGUGCUCGCAAGGUU	4.2	4.5	0.4	0	0.933333		tRNA-Asp(GTC)	ACGUAGCAAGUAUUUU	1.9	16.6	1		tRNA-Val(AAC)	GCAGCGGGCACUGUUGCUUUU	11.1
tRNA-Arg(TCG)	UUGAGAUACUGACUAGUCUGGUG	4.4	6	0	0	0.733333		tRNA-Cys(GCA)	UCACAUGGUAGACUUUUU	4.1	9.6	0.6
	AGGGAGGUUAUGAUUAACUUU	29.2	16.7	10.9	15.2	1.7485		tRNA-Gln(TTG)	GGUGGACAGGGGUCACUUUU	2153.1	1742.6	978.9
tRNA-Asp(GTC)	GUGUGUAGCUGCACUUUU	6.1	0.2	1.3	2.4	30.5		tRNA-Glu(TTC)	AGUCCGCCUAUCGGUAUUUU	6	0	0
	GCCGGGUACUUUCGUAUUUU	112	11.1	29.7	10.9	10.0901		tRNA-Gly(CCC)	CGGCUGCAUGAACUUUU	0	30.6	5.7
tRNA-Cys(GCA)	UUUGGCCUUUUCGAGAUACUGUUU	24	3.6	22.6	19.5	6.66667			CAACGGGCUGCUAUUU	18.5	85.7	8.6
	UGUGCUCCGGAGUUACCUCGUUU	22.8	3.9	112.7	38.5	5.84615		tRNA-Gly(TCC)	AGUGGGCUUACUUUUCUUU	115.9	0	8
tRNA-Gln(TTG)	UUCAAAGGUGAACGUUUU	56.9	2.3	58.2	56.6	24.7391		tRNA-His(GTG)	AACUGAAGGGUAUCUUU	20.4	46.2	8.9
tRNA-Glu(CTC)	GCCUUCCUUCGUUGGCUCUGCCUG	7.4	1.3	4.2	1.4	5.69231		tRNA-Ile(AAT)	UAAGCGGUAGUCUUUU	500.5	2228.1	261.2
tRNA-Glu(TTC)	UGACUGGACCUUUCUUU	9.1	3.4	314.5	41.4	2.67647			GUGGGUAUGAGCUUUUU	98.7	315.4	98.9
tRNA-Gly(GCC)	ACGAUGACGUUUUAUUCUU	2.5	1.3	0	0.5	1.92308		tRNA-Lys(CTT)	CUUGGAUUUCAACACUACUUUU	2.5	5.4	0.3
tRNA-Gly(TCC)	GUGUCAGUUUUUCUCUUCAGCUUUUU	2.5	0.8	0	0	3.125		tRNA-Met(CAT)	AGUUGGCUUUCCUCCUU	25.1	41.4	7.3
	AGUCGUUUUGGGUGUUUUU	15.7	0.8	0	0	19.625			AAGGCGGGCAAUGCUUUUC	3021	9964	4073.1
tRNA-His(GTG)	UUGUGAGGACAAUGGCACGGC	4.7	13.7	2.1	2.4	0.343066		tRNA-Ser(AGA)	GUGCAGCCCGUCCUUUU	42.3	236.1	18.5
	UUGUGGAAACAAUGGUACGGCAA	25.7	44.7	7.5	11.9	0.574944			GCCCAAGCCGUUCUUUU	1.6	3.5	0.3
	GGAGGGGAGAAGGUUUU	15.9	10.1	39.8	2.4	1.57426		tRNA-Ser(TGA)	GCCCGGAAGGGCUUCGCUUUUU	20.4	0	96.1
	UUGUGGGAACAAUGGCACGGCAAGG	7.6	19.4	2.1	2.9	0.391753		tRNA-Thr(AGT)	GGGGUCCCCCUUCAUCUU	2.8	15.6	1
tRNA-Ile(AAT)	GUAUUCUCUGUGGCUUUU	29.4	2.4	49.4	33.3	12.25			CCGGGCGCAGCGAUUUU	50.4	90.2	10.2
	GUGGGUGGCUUUUUUU	7.6	3.4	0	0	2.23529			GCGUGGACGAGGUCCGCCUUUU	24.1	18.8	15.9
	UUCCGUGGGUUUGUUUUUU	105.2	13.9	506.8	364.3	7.56835		tRNA-Thr(TGT)	CUGGACGUCCACUUUU	12.5	71.7	5.7
	GAGGGUUCUCACCUUCUCUCUCCG	3.4	0.8	26	3.8	4.25		tRNA-Trp(CCA)	CUGUGUUCCCGUGGCGGGUUCACUUUU	4.4	0	0.3
	UGGAUGCCAUAGUGGGGCCCUUC	4.7	0	0.4	0	N.A.		tRNA-Tyr(GTA)	GACGGCGAUAUAUUUU	93.3	1193.7	149.5
tRNA-Leu(CAG)	AGCGCUCUUUUCCGGUAUUU	2.9	0.8	0	0	3.625			GACGGCGGUAUUUUUU	13.5	56.7	2.2
tRNA-Leu(TAG)	ACCUCAGAAGGUCUCACUUU	74.8	4.7	172.6	133.7	15.9149		tRNA-Val(AAC)	CCGGCUGGCAGCCACGAUUU	137.8	0	84.3
tRNA-Lys(CTT)	GCAACUGGUCGUUUUA	8.6	1.7	25.1	15.2	5.05882		tRNA-Val(TAC)	UUGGCACUAAACUUUA	0.9	5.1	0.6
tRNA-Lys(TTT)	GGAGUGGUGGCUUUUA	3.4	1.7	0.4	0	2
tRNA-Met(CAT)	AGGCGUCUGUUUUGCCAUUU	2.7	0.4	0.4	0	6.75
	AUGGCCGCAUAUAUUU	6.1	2.6	25.5	15.2	2.34615
	GGGAGCGUUUUGUGGAUUUGUUU	35.5	13.2	13.8	6.7	2.68939
tRNA-Phe(GAA)	GAGAGCGCUCGGUUUUU	316.9	23.7	149.9	32.3	13.3713
tRNA-Pro(TGG)	UCGUGGCUACUGUUUU	4.2	0.6	58.6	138.4	7
tRNA-Ser(GCT)	CUCGGCUUUCCCUGCUAACUGGGCUUUU	6.9	0.9	3.8	1	7.66667
	AUGUGGUGGCUUACUUU	262.3	48.7	234.5	73.7	5.38604
	GCUAAGGAAGUCCUGUGCUCAGUUUU	184.3	11.7	116.9	121.8	15.7521
tRNA-Ser(TGA)	GAAGCGGGUGCUCUUAUU	39889	264.2	21617	10396.7	150.98
tRNA-Thr(AGT)	AACCGAGCGUCCAAGCUCUUUCCAUUUU	3.4	0.4	6.7	10.5	8.5
	GAUUUCUGUACCUUACACAUUUU	134.1	17.1	34.8	46.1	7.84211
	GAGUUAGCGGGGAGUGAUAUAUU	29.4	10	10.1	0.5	2.94
	CCGUGUUUCCCCCACGCUUU	3.2	0.2	9.6	2.9	16
	UUAUUCAAUUGAAACAGCGUGAUUU	4.9	0.2	0	0.5	24.5
tRNA-Thr(CGT)	AGGGUGUGCGUGUUUUUUU	349.3	144.7	172.1	54.7	2.41396
	AGACCCGAGGUAGGGCUUUG	25.7	0.4	10.5	5.2	64.25
tRNA-Thr(TGT)	CCUGUUGGCUUACUUUU	4.4	1.5	51.9	37.1	2.93333
	GGCUGUAGGAAUACUUUU	6.4	0.6	6.3	3.8	10.6667
tRNA-Tyr(GTA)	ACAAGUGCGGUUUUUU	15	1.9	0	0	7.89474
tRNA-Val(AAC)	AAGAGAGUCGCUUUUU	22.6	7.9	0	0	2.86076
	AGUGGUUACCCUUCUUACGUCUU	2.5	0.8	1.3	1.4	3.125
tRNA-Val(CAC)	AAGUGGUUCCCGUUUUUGUUU	7.6	1.9	18.8	4.3	4
tRNA-Val(TAC)	UAGCCGUAAGGCGGCUGUUUU	76.2	0.9	5	26.6	84.6667
	GGUGUGGUCUGUUGUUU	113	41.3	178.4	53.7	2.73608
	UGAGAUGUUACCUAGCGUUU	14	0.9	2.9	1.9	15.5556
	GGCGUGAUUCAUACCUUUU	75	0.9	16.8	4.3	83.3333
